# Supplementary material for: Dosage compensation can buffer copy-number variation in wild yeast
Source: eLife. 2015 May 8;4:e05462. doi: 10.7554/eLife.05462 (PMC4448642; doi:10.7554/eLife.05462)
Supplement: Supplementary file 1. — Strains used in this study. DOI: http://dx.doi.org/10.7554/eLife.05462.014 [file elife05462s001.xlsx]

## Sheet: Sheet1
Strain Name	Ploidy	Aneuploidy status	Isolation Source	Obtained From	Genotype	Order in Fig 1A data	Strain index in Gasch Strain Library
BY4743	Diploid	Euploid	Lab strain	D. Botstein	S288c_Mat a/alpha his3-Δ1/his3-Δ1 leu2-Δ0/leu2-Δ0 lys2-Δ0/LYS2 met15-Δ0/MET15 ura3-Δ0/ura3-Δ0	N/A	AGY003
NCYC110_Chr8-2n	Diploid	Euploid	derived	G. Liti, N/AtioN/Al Collection of Yeast Cultures		N/A	AGY729
NCYC110_Chr8-3n	Diploid	Chr 8 (3n)	derived	G. Liti, N/AtioN/Al Collection of Yeast Cultures		N/A	AGY730
NCYC110 (aka NCYC110_Chr8-4n)	Diploid	Chr 8 (4n)	West Africa, Ginger beer from Z. officiN/Ale	G. Liti, N/AtioN/Al Collection of Yeast Cultures		47	AGY703
NCYC3290	Diploid	Euploid	West Africa, Bili Wine	G. Liti, N/AtioN/Al Collection of Yeast Cultures		46	AGY362
W303_Chr12-2n	Diploid	Euploid	derived	this study, see Methods	W303_Mat a/alpha ade2-1/ade2-1, leu2-3/leu2-3, ura3/ura3, trp1-1/ trp1-1, his3-11,15/his3-11,15, can1-100/can1-100, GAL, psi+, ade1Δ::HIS3/ADE1, lys2Δ::KAN/LYS2, ade16Δ::HygMX4/ADE16	N/A	AGY765
W303_Chr12-3n	Diploid	Chr 12 (3n)	derived	this study, see Methods	W303_Mat a/alpha ade2-1/ade2-1, leu2-3/leu2-3, ura3/ura3, trp1-1/ trp1-1, his3-11,15/his3-11,15, can1-100/can1-100, GAL, psi+, ade16Δ::HIS3/ade16Δ::KAN/ade16Δ::HygMX4	N/A	AGY766
W303_Chr12-4n	Diploid	Chr 12 (4n)	derived	this study, see Methods	W303_Mat a/alpha ade2-1/ade2-1, leu2-3/leu2-3, ura3/ura3, trp1-1/ trp1-1, his3-11,15/his3-11,15, can1-100/can1-100, GAL, psi+, ade16Δ::HIS3/ade16Δ::KAN/ade16Δ::HygMX4/ade16Δ::NatMX4	N/A	AGY767
YPS163	Diploid	Euploid
YPS1009_Chr12-2n	Diploid	Euploid	derived	this study, see Methods		N/A	AGY613
YPS1009 (aka YPS1009_Chr12-3n)	Diploid	Chr 12 (3n)	Mettlers Woods, NJ, USA, Oak Exudate	Paul Sniegowski		45	AGY066
YPS1009_Chr12-4n	Diploid	Chr 12 (4n)	derived	this study, see Methods		N/A	AGY614
haploid_W303	Haploid	Euploid	Lab strain	C. Fox	W303_Mat a ade2-1, leu2,3-112, ura3-1, trp1-1, his3-11, can1-100, GAL	N/A	AGY103
haploid_W303_Chr12-disome	Haploid	Chr 12 (disomic)	N/A	Angelika Amon	W303_Mat a, ade2-1, leu2-3, ura3, trp1-1, his3-11,15, can1-100, GAL, psi+, ade16Δ::KAN/ade16Δ::HIS3	N/A	AGY488
haploid_YPS1009	Haploid	Euploid	derived	this study, see Methods	YPS1009 Mat a hoΔ::HygMX4	N/A	AGY731
haploid_DBY7268 (aka DBY7286_monosome)	Haploid	Euploid	Lab strain	D. Botstein	S288c_Mat a ura3-52 GAL2 ho-	N/A	AGY001
haploid_DBY7268_disome	Haploid	Chr 8 (disomic)	derived	this study, see Methods	S288c_Mat a ura3-52 GAL2 ho-	N/A	AGY1099
haploid_KCY40 (aka KCYC40_monosome)	Haploid	Euploid	haploid derivative of VC580 from MO vineyard, Chardonel grape	K. Clowers, Gasch Lab (Clowers et al, Mol Biol Evo, under revision)	VC580_Mat a hoΔ::MFA-HYG,NAT	N/A	AGY806
haploid_KCY40_disome	Haploid	Chr 8 (disomic)	derived	this study, see Methods	VC580_Mat a hoΔ::MFA-HYG,NAT	N/A	AGY1105
haploid_YPS163 (aka haploid_YPS163_monosome)	Haploid	Euploid	derived	this study, see Methods	YPS163_Mat a hoΔ::KAN	N/A	AGY741
haploid_YPS163_disome	Haploid	Chr 8 (disomic)	derived	this study, see Methods	YPS163_Mat a hoΔ::KAN	N/A	AGY1106
T73_Chr8-2n	Diploid	Euploid	derived	this study, see Methods		N/A	AGY1211
T73_Chr8-4n	Diploid	Chr 8 (4n)	Alicante, Spain, Grape red wie	Justin Fay, Washington University		11
YJM428_Chr16-2n	Diploid	Euploid	derived	this study, see Methods		N/A	AGY1213
YJM428_Chr16-3n	Diploid	Chr 16 (3n)	derived	this study, see Methods		N/A	AGY1212
YJM428_Chr16-4n	Diploid	Chr 16 (4n)	derived	this study, see Methods		N/A	AGY1214
Schizosaccharomyces pombe PR100	Haploid	Euploid	Lab strain	J. Millar	PR100 h+ leu1.32 ura4.D18	N/A	AGY310
YJM451	Diploid	Euploid	Europe, Clinical isolate	J. McCusker		1
Y2189	Diploid	Chr 1 (4n), Chr 3 (3n), Chr 9 (3n), Chr 11 (3n)	San Jacinto, California, USA, Drosophila	C. Kurtzman, USDA ARS Culture Collection		2
YJM428	Diploid	Chr 12 (3n), Chr 16 (4n)	USA, Clinical isolate	J. McCusker		3
YB908	Diploid	Euploid	NA, Wild cherry tree gum	C. Kurtzman, USDA ARS Culture Collection		4
YJM421	Diploid	Euploid	USA, Clinical isolate	J. McCusker		5
YJM653	Diploid	Euploid	N/A, Clinical isolate	J. McCusker		6
FL100	Diploid	Euploid	Lab strain	Justin Fay, Washington University		7
UC5	Haploid	Chr 1 L arm	Kurashi, Japan, Sake	UC Davis via Justin Fay, Washington University		8
YB210	Diploid	Euploid	Costa Rica, Banana	C. Kurtzman, USDA ARS Culture Collection		9
SB	Diploid	Chr 1 (<3n)	Indonesia, Lychee fruit	Audrey Gasch, University of Wisconsin		10
YJM454	Diploid	Euploid	USA, Clinical isolate	J. McCusker		12
Y7568	Diploid	Euploid	Philippines, Papaya	C. Kurtzman, USDA ARS Culture Collection		13
YJM440	Diploid	Chr 1 L arm loss, Chr 6 loss	USA, Clinical isolate	J. McCusker		14
YB4082	Diploid	Euploid	Philippines, Papaya	C. Kurtzman, USDA ARS Culture Collection		15
Y3	Diploid	Chr 8 (3n)	Africa, Palm Wine	C. Kurtzman, USDA ARS Culture Collection		16
Y389	Diploid	Euploid	N/A, Mushrooms	C. Kurtzman, USDA ARS Culture Collection		17
Y2	Diploid	Euploid	Trinidad, Rum fermentation	C. Kurtzman, USDA ARS Culture Collection		18
YJM339	Diploid	Chr 1 loss	USA, Clinical isolate	J. McCusker		19
Y1	Diploid	Euploid	N/A, Mushrooms	C. Kurtzman, USDA ARS Culture Collection		20
Y6	Diploid	Chr 8 (3n)	French Guiana, N/A	C. Kurtzman, USDA ARS Culture Collection		21
EthanolRed	Diploid	Euploid	N/A, Biofuel strain	N/A		22
PW5	Diploid	Euploid	Aba, Nigeria, Raphia palm wine	Justin Fay, Washington University		23
WE372	Diploid	Chr 1 (3n)	Cape Town, South Africa, Wine	Justin Fay, Washington University		24
I14	Diploid	Euploid	Petina, Italy, Vineyard (soil)	Justin Fay, Washington University		25
CBS7960	Haploid	Chr 8 (disomic)	Sau Paulo, Brazil, Industrial fermentation (sugar cane)	Justin Fay, Washington University		26
YJM1129	Diploid	Euploid	N/A, Fermentation (Distillery)	J. McCusker		27
Y2209	Diploid	Euploid	San Jacinto, California, USA, Leaves from Lepidopterous	C. Kurtzman, USDA ARS Culture Collection		28
CLIB324	Diploid	Euploid	Vietnam, Bakery	Justin Fay, Washington University		29
NC02	Diploid	Euploid	Smoky Mountains, NC, Oak Exudate	Justin Fay, Washington University		30
K1	Diploid	Chr 3 (4n)	Japan, Sake	C. Kurtzman, USDA ARS Culture Collection		31
K9	Diploid	Chr 9 (3n), Chr 10 (3n)	Japan, Sake	C. Kurtzman, USDA ARS Culture Collection		32
K10	Diploid	Euploid	Japan, Sake	C. Kurtzman, USDA ARS Culture Collection		33
IL01	Diploid	Euploid	Cahokia, IL, Soil	Justin Fay, Washington University		34
YJM269	Diploid	Euploid	N/A, Fermentation (Apple juice)	J. McCusker		35
YJM326	Diploid	Euploid	USA, Clinical isolate	J. McCusker		36
YJM326	Diploid	Euploid	USA, Clinical isolate	J. McCusker		36
DBVPG1853	Diploid	Euploid	Ethiopia, White tecc	G. Liti, National Collection of Yeast Cultures		37
YJM320	Diploid	Euploid	USA, Clinical isolate	J. McCusker		38
YIIc17_E5	Diploid	Euploid	Sauternes, France, Wine	G. Liti, National Collection of Yeast Cultures		39
PE2	Diploid	Euploid	Brazil, Sugar cane fermentation	Argueso, JL et al., Genome Res. 2009, Tom Jeffries		40
YJM308	Diploid	Euploid	USA, Clinical isolate	J. McCusker		41
YB4081	Diploid	Euploid	Philippines, Guava	C. Kurtzman, USDA ARS Culture Collection		42
YS4	Diploid	Euploid	The Netherlands, Bakery	G. Liti, National Collection of Yeast Cultures		43
YPS163	Diploid	Euploid	Pennsylvania, USA, Oak Exudate	Paul Sniegowski		44
