# Supplementary material for: Dosage compensation can buffer copy-number variation in wild yeast
Source: eLife. 2015 May 8;4:e05462. doi: 10.7554/eLife.05462 (PMC4448642; doi:10.7554/eLife.05462)
Supplement: Supplementary file 2. — Functional enrichments and p-values for gene classes. All enrichments with p < 2e-3 are shown; enrichments that meet the Bonferroni cutoff (2e-5) are highlighted in red. Enrichments are listed for (a) amplified genes with expression proportionate to gene copy (from Figure 4A), (b) pooled set of amplified genes with expression proportionate to gene copy (from Figure 9), (c) dosage compensated genes (from Figure 9). (d) Genes in Class 2a, (e) genes with higher-than-expected expression (from Figure 4A,B plus Class 3b genes). DOI: http://dx.doi.org/10.7554/eLife.05462.015 [file elife05462s002.xlsx]

## Sheet: Sheet1
Table S2: functional enrichments in gene groups. Functional groups enriched at p<2e-3 are shown for each group. Groups enriched at the stringent cutoff of p<1e-5 are highlighted in red.
Table S2A: Amplified genes with less-than-expected relative expression (Fig 4A, blue points)
Category	p-value	In Category from Cluster	Number of gene with annotation in subset	Number of yeast genes with annotation
mitochondrion [GO:0005739]	9.91925e-09	PGS1 LDB16 ILV6 NFS1 MXR2 MGR1 YCL057C-A PRD1 MRPL32 YCP4 CIT2 BPH1 IMG1 IMG2 PTC6 TRX3 MRP4 YLF2 QCR10 LEU5 YHR003C SOD2 DIA4 MAS2 PUT2 RRF1 COX6 FYV4 YHR080C SAM35 NAM8 MSR1 COX23 TOM71 MSH1 YCK1 YHR162W MTG2 GND1 KOG1 PTH1 MDM31 AIM18 YIA6 SNL1 TIM44 PKP1 SYG1 MMF1 FIS1 RNR3 MAM33 YIL077C THS1 AIM19 RSM25 FMC1 KGD1 OM45 GUT2 COA1 MRS1 COX16 TDH1 BNA3 MRPL8 KHA1 MRPL49 MEF2 YJL133C-A TIM17 YJL1…	188	1072
mitochondrial translation [GO:0032543]	2.79154e-06	MRPL32 IMG1 IMG2 MRP4 RRF1 MSR1 PTH1 MMF1 RSM25 MRPL8 MRPL49 RSM26 MRP17 MRPL13 MRPL20 MEF1 SLS1 MRPL15 NAM2 MRPL4 MRPS16 ISM1 MRP51 MRPL40 RTC6 MRPL51 MRP2	27	88
nucleus [GO:0005634]	2.99191e-06	SGF29 GBP2 NFS1 RNQ1 BIK1 GID7 SPB1 KAR4 ADF1 KRR1 MRC1 POL4 YCR016W HTL1 RPS14A SNT1 TAF2 BUD23 YCR051W RSC6 PWP2 YIH1 TAH1 BUD31 HCM1 RAD18 PAT1 SRB8 TUP1 YCR087C-A YCR090C MSH3 CDC39 HMRA2 YAP3 OPI1 SNF6 SBP1 STP2 PIH1 BRL1 BCD1 SRB2 AAP1 RSC30 MED6 RPP1 TRM5 STE12 IPI1 RTC3 GAR1 YNG2 TRA1 ORC6 SET1 YHR127W IGO2 WSS1 RTT107 SOL3 DNA2 PRP8 DBP8 SPC97 STB5 IKI1 EGD2 MDM31 NVJ1 RIX1 SCH9 SKN7 EST…	295	1965
ribonucleoprotein complex [GO:0030529]	3.16986e-06	KRR1 MRPL32 RPS14A IMG1 PWP2 IMG2 MRP4 RPS20 RPL8A GAR1 PRP8 RPS4B SNP1 RPS24B RSM25 RPL16A RPL40A MSL1 MRPL8 MRPL49 RPL39 TMA22 RSM26 MRP17 SRP21 MRPL13 MRPL20 RPL40B SOF1 RPL8B RPL15A RPS0B RPL22A RPL10 DIP2 SMD3 RPS31 RPL37A EMG1 NOP56 RSA3 UTP13 RPS28B SMD2 MRPL15 RPL38 RPP0 RPL26A RPL31B UTP21 LSM3 MRPL4 RPL6B MRPS16 RPS9A RPS6A MRP51 MRPL40 RTC6 RPL7B SRP72 MRPL51 RPL11A RRP9 MRP2	65	307
ribosome biogenesis [GO:0042254]	3.59336e-06	SPB1 KRR1 RPS14A PWP2 RPL8A BCD1 IPI1 GAR1 DBP8 RIX1 FAF1 RPL40A RRP14 TOR2 RPL40B DRS1 SOF1 RPL8B NOC3 RLP24 SDO1 RPS0B FCF2 DIP2 RPS31 EMG1 NOP56 RSA3 UTP13 DBP9 RPP0 UTP21 RRP12 NOP4 RPS9A RPS6A NOG1 NOP53 RTC6 BMS1 RRP9 RRP15	42	170
nucleus [750]	1.04795e-05	SGF29 GBP2 DCC1 NFS1 RNQ1 BIK1 LSB5 GID7 SPB1 KAR4 KRR1 MRC1 POL4 YCR016W MAK31 HTL1 YCR025C SNT1 TAF2 BUD23 YCR051W RSC6 YIH1 TAH1 BUD31 HCM1 RAD18 RSA4 PAT1 SRB8 TUP1 YCR090C KIN82 MSH3 CDC39 HMRA2 YAP3 OPI1 SNF6 SBP1 STP2 TDA3 DIA4 RRM3 PIH1 BCD1 SRB2 AAP1 CPR2 MED6 RPP1 TRM5 STE12 IPI1 NAM8 RTC3 GAR1 YNG2 ORC6 SET1 YHR127W IGO2 YCK1 RTT107 SOL3 DNA2 PRP8 DBP8 SPC97 STB5 MDM31 NVJ1 RIX1 RPN10 …	293	1976
translation [GO:0006412]	1.08801e-05	SRO9 MRPL32 RPS14A IMG1 IMG2 MRP4 RPS20 RPL8A DIA4 RRF1 MSR1 MTG2 PTH1 RPS4B RPS24B THS1 RSM25 RPL16A RPL40A MRPL8 MRPL49 MEF2 RPL39 MRP17 HBS1 RPL40B DPS1 RPL8B RLP24 RPL15A RPS0B RPL22A MEF1 RPL10 SLS1 RPS31 RPL37A HCR1 TMA7 RPS28B GUF1 GCD7 RPL38 RPP0 RPL26A NAM2 RPL31B MRPL4 RPL6B TAE2 MRPS16 ISM1 RPS9A RPS6A MSY1 MRPL40 RTC6 NAB3 RPL7B TIF6 TIF5 MSF1 RPL11A TIF3 MRP2	65	318
ribosomal proteins [12.01.01]	3.29027e-05	MRPL32 RPS14A IMG1 IMG2 MRP4 RPS20 RPL8A PIH1 RPS4B RPS24B RSM25 RPL16A RPL40A SQT1 MRPL8 MRPL49 RPL39 RSM26 MRP17 MRPL13 MRPL20 RPL40B DRS1 RPL8B RPL15A RPS0B RPL22A RPL10 MDN1 RPS31 RPL37A RSA3 RPS28B DBP9 MRPL15 RPL38 RPP0 RPL26A RPL31B MRPL4 RPL6B MRPS16 RPS9A RPS6A MRP51 MRPL40 RTC6 RPL7B MRPL51 RPL11A RRP15 MRP2	52	246
mitochondrial matrix [GO:0005759]	3.84898e-05	PTC6 SOD2 DIA4 MAS2 PUT2 TRM5 MSR1 PPX1 PKP1 MMF1 MAM33 FMC1 KGD1 MRS1 SSC1 MDH1 CCP1 MAS1 HSP60 GUF1 ACO1 NAM2 SUV3 ISM1 MSY1 COA2 YAH1 AIM45 MSF1	29	111
YLR288C (MEC3)	5.02576e-05	ILV6 YCR007C YCR016W MSL1 MBB1 CYC1 MIR1 URA6 ASK1 TOA2 POM33 CMS1 RLP24 LOT6 IRC25 FCF2 LCL2 YLR125W STM1 YKE2 LIP2 NDL1	22	75
ribosome [GO:0005840]	0.000125358	MRPL32 RPS14A IMG1 IMG2 RSA4 MRP4 RPS20 RPL8A YHR080C APE4 RPS4B RPS24B RSM25 RPL16A RPL40A AIM21 MRPL8 MRPL49 YJL118W RPL39 TMA22 RSM26 MRP17 YET1 MRPL13 MRPL20 RPL40B POM33 RPL8B RLP24 RPL15A RPS0B RPL22A RPL10 RPS31 RPL37A RPS28B MRPL15 RPL38 RPP0 RPL26A RPL31B MRPL4 RPL6B TAE2 RRP12 MRPS16 RPS9A RPS6A SYH1 MRP51 MRPL40 RTC6 RPL7B YPR091C MRPL51 RPL11A YPR148C TIF3 MRP2	60	310
Bud localization [52.10.05]	0.000129008	CDC10 RVS161 BUD5 PWP2 MYO1 CDC12 AXL2 SPE1 NAP1 SPA2 CDC3 BUD6 VRP1	13	35
Slow Growers	0.000178395	DCC1 BIK1 MRC1 MRPL32 RVS161 HTL1 FEN2 PER1 IMG1 BUD23 BUD31 HCM1 IMG2 PAT1 SRB8 TUP1 SNF6 GOS1 SOD2 DIA4 PIH1 RRF1 VMA10 SRB2 FYV4 MSH1 MTG2 GND1 MDM31 RPS4B EST3 CAP2 FIS1 RSM25 MSL1 YVH1 COX16 MRPL49 MEF2 QCR8 RPL39 MRP17 DEF1 APN1 EAP1 MRPL20 RTT109 MMM1 COX19 IRC19 YLL044W PDC1 YLR049C IES3 RPL22A PET309 FYV7 MEF1 BUD20 SIC1 GEP5 SLS1 SWI6 RPL37A HCR1 UPS1 YKE2 COQ9 TOP3 VPS34 LCB5 YPT6 SEC2…	104	616
rRNA processing [11.04.01]	0.000214495	SPB1 KRR1 PWP2 RSA4 SBP1 PIH1 RPP1 IPI1 GAR1 DBP8 RIX1 FAF1 DRS1 SOF1 NOC3 SDO1 REX2 FYV7 MDN1 DIP2 EMG1 HCR1 NOP56 UTP13 IFH1 DBP9 UTP21 TSR2 LSM3 RRP12 SUV3 NOP4 NOP53 BMS1 TIF6 RRP9 RRP15	37	169
YIL038C (NOT3)	0.000444235	CDC39 NOT3 PDC1 SAM1 FAS2	5	7
mitochondrial intermembrane space [GO:0005758]	0.000588838	PRD1 PTC6 COX23 CYC1 MDM35 CYT2 MIA40 CCP1 COX17 COX19 UPS2 UPS1 COA4	13	40
mitochondrial respiratory chain complex IV assembly [GO:0033617]	0.000602129	COA1 COX16 COX17 COX19 COX12 COA4 COA2	7	14
Bassler et al. (2001) - Mol Cell 8:517-	0.000798509	SPB1 RSA4 RIX1 MTR2 NOC3 MDN1 NOG1 NOP53 MEX67 BMS1	10	27
actin cortical patch [GO:0030479]	0.000895934	LSB5 RVS161 ABP1 YSC84 BZZ1 CAP2 ARC15 AIM21 PAN1 BBC1 ARP3 CAP1 ENT4 VRP1 CRN1 BSP1	16	57
YHR030C (SLT2)	0.000976461	SMD3 YPT6 SEC22 YLR346C	4	5
YMR022W (QRI8)	0.000976461	BCY1 UBI4 SSK1 AHP1	4	5
nucleosome disassembly [GO:0006337]	0.00100914	HTL1 RSC6 RSC30 NAP1 RSC58 SFH1 RSC2 ARP7	8	19
actin cortical patch localization [GO:0051666]	0.00101148	LSB5 RVS161 CDC50 YSC84 VRP1 CRN1 BSP1	7	15
RNA metabolic process [GO:0016070]	0.00101148	NMD2 RTC3 SDO1 PET309 SGD1 TIF5 SCD6	7	15
YGR245C (SDA1)	0.00101148	RSA4 RIX1 NAP1 BUD20 MDN1 NOG1 TIF6	7	15
essential	0.0010722	PGS1 NFS1 PDI1 PBN1 SPB1 KRR1 RSC6 PWP2 RSA4 CDC39 RPS20 MYO1 MAS2 BRL1 BCD1 MED6 RPP1 TRM5 SAM35 IPI1 CDC12 ORC6 DNA2 SPC97 KOG1 ERG9 RIX1 FAF1 RPB3 TIM44 MET30 MMF1 SNP1 ARC15 YRB2 THS1 CAB2 MOB1 NUP159 RHO3 CCT2 PAN1 DSN1 SQT1 RPR2 SEC11 PHS1 TIM17 SSC1 CDC8 ARP3 YAE1 RAM2 URA6 UGP1 SPC42 ASK1 TOA2 MPE1 RRP14 CAB3 YJU2 ABF1 SRP21 SDH3 RPC25 RPT1 GPM1 YKL153W FAS1 MTR2 ACP1 MIA40 YKT6 TOR2 PAP1…	165	1099
Morphology - Large	0.00110873	DCC1 BIK1 SRO9 MRC1 RAD18 YAP3 ARD1 SRB2 ARP1 RTT107 RPN10 EST3 RNR3 TOK1 RPE1 CAP1 YKL033W-A EAP1 RTT109 PDC1 GIS3 VTA1 QRI5 TOP3 VPS34 SEC22 RSC2 ROM2 TSR2 VTC3 CIN2 PLC1 CTF4	33	158
Actin cytoskeleton mutants [52.30.10]	0.00123047	RVS161 KIC1 CDC12 CAP2 CCT2 PAN1 ARP3 CAP1 TOR2 RPL10 CDC3 BUD6 VRP1 ROM2	14	48
Respiratory deficiency [42.25.20]	0.00143664	MRPL32 RVS161 PET18 IMG1 IMG2 RRF1 MSH1 EGD2 BCY1 MMF1 MRS1 MRPL8 IXR1 MDH1 CYT2 ACP1 MMM1 COX17 SDH2 COX12 PET309 SLS1 ATP14 ACO1 NAM2 MRPL4 SUV3 ISM1 ATP4 MSY1 MRP51 HFI1 PLC1 TOM5 MRP2	35	173
aerobic respiration [02.13.03]	0.0017061	QCR10 DIA4 COX6 COX23 MAM33 COX16 QCR8 SDH3 SDH2 ADE16 COX12 PET309 YLR132C SLS1 COQ9 HAP1 COX8 COX11 MRPL51	19	77
protein kinase inhibitor activity [GO:0004860]	0.00178595	LRE1 SPL2 FAR1	3	3
negative regulation of translational initiation [GO:0045947]	0.00178595	PAT1 TIF5 SCD6	3	3
Complex Number 195 [550.2.195]	0.00178595	MAS2 MSH1 MAS1	3	3
YGL090W (LIF1)	0.00178595	CDC50 NEJ1 SPP382	3	3
rRNA processing [GO:0006364]	0.00188169	SPB1 KRR1 RPS14A PWP2 PIH1 RPP1 IPI1 GAR1 DBP8 RIX1 RRP14 DRS1 SOF1 NOC3 SDO1 RPS0B FCF2 FYV7 MDN1 REX3 DIP2 EMG1 NOP56 UTP13 DBP9 UTP21 TSR2 LSM3 NOP4 RPS9A MOT1 RPS6A NOG1 NOP53 BMS1 TIF6 RRP9 RRP15	38	195
Table S2b: Amplified genes with proportinate increased expression (Fig 4A and 4B, grey points, + Class 1)
Morphology - WT	5.24109e-11	YCL002C LDB16 STP22 BUD3 KCC4 AGP1 FRM2 GRX1 ATG22 MGR1 POF1 APA1 PRD1 CIT2 YCR015C CWH43 PET18 YCR023C SLM5 PMP1 SYP1 SNT1 RBK1 PHO87 YCR043C THR4 YIH1 TAH1 SED4 CPR4 SSK22 YCR076C SRB8 AHC2 TRX3 CSM1 FIG2 YCR090C KIN82 MSH3 YCR101C STE20 OTU2 DUR3 YHL017W RIM4 YHL026C RIM101 ECM29 CBP2 EFM1 QCR10 YSC83 YHR022C THR1 VMA16 ERC1 YHR033W MSC7 YHR045W INM1 FSH1 SMF2 VMA22 GIC1 SSZ1 SSF1 YHR078W YHR0…	715	3667
cytoplasm [GO:0005737]	2.43877e-09	STP22 LEU2 FRM2 GRX1 APA1 PRD1 PGK1 SLM5 RRP43 RBK1 BUD5 THR4 CTR86 YIH1 TAH1 PAT1 AHC2 YCR090C MSH3 CDC39 RPL14B STE20 PRS3 OTU2 RIM4 RIM101 ECM29 EFM1 OSH7 ARD1 DED81 YHR020W RPN1 SLT2 YHR033W PIH1 BCD1 INM1 FSH1 GIC1 SSZ1 DYS1 RRP4 QNS1 YHR097C SFB3 SBE22 GRE3 YHR112C YHR131C RPL42B YAP1801 DNA2 NMD3 OYE2 NBL1 SCH9 YIL001W INP51 CFD1 NAS2 URM1 VID28 FAF1 HIS6 BCY1 NOT3 GVP36 AGE2 PIG2 DFG10 PC…	425	2026
ATP binding [GO:0005524]	3.97857e-07	KCC4 APA1 PGK1 SLM5 RBK1 SSK22 KIN82 MSH3 STE20 PRS3 DED81 YHR020W YHR022C THR1 SLT2 RRM3 SSZ1 QNS1 KSP1 RPF1 DNA2 SCH9 CFD1 FAA3 PDR11 TIM44 CKA1 NEO1 RNR3 THS1 PRK1 PFK26 STH1 CCT2 SSL2 SLN1 YIL151C MPH1 PRI1 YIR016W CYR1 CCT8 CCT3 MPS3 HCA4 KAR2 AIM22 MTR4 IKS1 TRL1 SRS2 BCK1 LSB6 GSH1 CCT7 PBS2 URA2 YAK1 FBP26 TPK1 HAL5 SWE1 CDC6 MET3 RAD26 TAH11 UTR1 PTK2 CCT5 TOR1 RFC2 ADO1 CPA2 YJR124C HSL…	151	622
membrane [GO:0016020]	4.51208e-07	YCL002C LDB16 STP22 AGP1 ATG22 MGR1 CWH43 YCR023C PMP1 RHB1 FEN1 PHO87 SED4 CPR4 FIG2 CDC50 DUR3 YHL017W YHL026C QCR10 NEM1 ERG11 YSC83 VMA16 ERC1 NCP1 YHR045W SMF2 ERG7 YHR078W YHR080C SFB3 GEP4 BIG1 EPT1 NSG1 CHS7 MTC6 YAP1801 CTR2 SVP26 GPI16 MDM31 MNL1 EPS1 YIA6 TIR3 PDR11 MNT3 SNL1 TIM44 YKE4 YIL029C SSM4 APQ12 GVP36 CBR1 YIL046W-A NEO1 DFG10 FIS1 YIL067C SEC28 KTR7 YIL089W ICE2 YIL092W SLM1…	348	1671
transferase activity [GO:0016740]	1.02797e-06	KCC4 APA1 CIT2 PGK1 FEN1 RBK1 SSK22 KIN82 STE20 PRS3 EFM1 ARD1 THR1 SLT2 YHR033W DYS1 KSP1 EPT1 FUR1 SCH9 MNT3 CKA1 SEE1 KTR7 PRK1 PFK26 HPM1 HIS5 SLN1 PRI1 DAL7 GTT1 OST1 BET4 AIM22 IKS1 LAS21 ARG2 TRL1 GWT1 BCK1 LSB6 GCD14 PBS2 URA2 GLG2 YUR1 YAK1 TPK1 HAL5 ERG20 SET2 MNN11 MNN5 SWE1 ELO1 POL31 MET3 GPI14 POL32 UTR1 PTK2 TOR1 OPI3 HOC1 ADO1 IBA57 STR2 PMT4 BAT2 HSL1 PRR1 KKQ8 NNK1 PTK1 TRP3 TRM…	147	611
endoplasmic reticulum [GO:0005783]	1.39115e-06	CWH43 FEN1 SED4 NEM1 ERG11 RPN1 MSC7 NCP1 YHR045W ERG7 SFB3 BIG1 EPT1 NSG1 CHS7 SVP26 GPI16 MNL1 EPS1 SNL1 YKE4 SSM4 APQ12 CBR1 DFG10 ICE2 SEC24 AYR1 GTT1 OST1 KAR2 LAS21 JEM1 PRY1 SCP160 GWT1 PHO86 LCB3 SFH5 CIS3 ERG20 SPC1 GPI14 GEF1 EMC2 STE24 PMT4 YJU3 AIM27 BET3 MMM1 EMC6 POM33 GPI13 YCT1 THI73 IZH3 SMF3 YLR050C ERG3 PER33 SPC3 BOS1 GAA1 ERG27 HRD3 SEC13 FAR10 ARV1 ERF2 SEC22 CTS1 ORM2 SUR4 …	107	416
endoplasmic reticulum membrane [GO:0005789]	1.8417e-06	CWH43 FEN1 SED4 NEM1 NCP1 ERG7 SFB3 BIG1 EPT1 NSG1 CHS7 GPI16 EPS1 SNL1 YKE4 SSM4 CBR1 DFG10 ICE2 SEC24 MGA2 GTT1 PRE3 OST1 LAS21 JEM1 SCP160 GWT1 LCB3 SFH5 SPC1 GPI14 STE24 PMT4 AIM27 MMM1 EMC6 POM33 GPI13 AQY2 YCT1 THI73 IZH3 SMF3 YLR050C ERG3 PER33 SPC3 BOS1 GAA1 ERG27 HRD3 SEC13 ARV1 ERF2 SEC22 HRI1 ORM2 SEC61 FLD1 HMG2 GAB1 MNN9 SEC16 YDC1 SEC62 ERI1 SPT14 UIP4 PGC1 SAR1 FLC1 ALG5 HUT1 YPR00…	86	318
nucleotide binding [GO:0000166]	2.02691e-05	KCC4 APA1 PGK1 SLM5 RHB1 RBK1 SSK22 KIN82 MSH3 STE20 PRS3 RIM4 DED81 YHR020W YHR022C THR1 SLT2 RRM3 SSZ1 QNS1 KSP1 FUR1 DNA2 SCH9 CFD1 FAA3 PDR11 TIM44 BCY1 CKA1 NEO1 RNR3 THS1 PRK1 PFK26 RHO3 STH1 CCT2 SSL2 SLN1 YIL151C SGN1 MPH1 PRI1 MSL1 YIR016W CYR1 CCT8 RPC17 CCT3 MPS3 HCA4 KAR2 AIM22 MTR4 IKS1 TRL1 SRS2 BCK1 LSB6 GSH1 CCT7 PBS2 URA2 RPB4 YAK1 FBP26 TPK1 HAL5 SWE1 CDC6 MET3 RAD26 UTR1 PTK2 C…	173	778
Heat-sensitivity (ts) [12.05]	2.2287e-05	TAF2 PAT1 NEM1 RPN1 SLT2 DNA2 BCY1 RPN2 THS1 NUP159 RHO3 STH1 MET18 CCT2 MCM10 STS1 GTT1 CYR1 CTK2 NSP1 TIM54 BCK1 CHS6 GCD14 SPT10 RPB4 YAK1 PRP21 RCY1 CBP1 POL31 GEA1 NUP85 HIT1 RFC2 CDC11 FIP1 CDC16 RAD27 PRP16 MMM1 HSP104 PRP19 COF1 GTT2 SNF7 BOS1 APC2 PEP3 CDC42 VPS34 YHC1 STT4 CDC25 VRP1 VPS33 SEN1 SVL3 VPS16 GPI2 BRO1 ELP3 SSE1 TAF14 MKK2 BEM4 COX10 SPT14 IPL1 LEA1 IQG1 HFI1 MCM4 YME1 HTS1…	81	313
Hydroxyurea sensitivity [82.10.05]	2.58201e-05	PAT1 MSH3 DPB11 POL31 POL32 TAH11 RFC2	7	8
integral to membrane [GO:0016021]	9.2367e-05	YCL002C LDB16 AGP1 ATG22 MGR1 CWH43 YCR023C PMP1 FEN1 PHO87 SED4 CPR4 CDC50 YCR101C DUR3 YHL017W YHL026C OSH7 QCR10 NEM1 ERG11 VMA16 ERC1 MSC7 NCP1 YHR045W SMF2 YHR078W YHR080C BIG1 EPT1 NSG1 CHS7 MTC6 CTR2 SVP26 GPI16 MDM31 EPS1 YIA6 PDR11 MNT3 SNL1 TIM44 YKE4 YIL029C SSM4 APQ12 CBR1 YIL046W-A NEO1 DFG10 FIS1 YIL067C KTR7 YIL089W ICE2 YIL092W COX5B POR2 NUP159 QDR1 AYR1 FLX1 AXL2 ATG32 SLN1 MLP2…	266	1303
nucleus [GO:0005634]	0.000120027	FRM2 RRP7 GRX1 APA1 HMLALPHA2 SNT1 RRP43 RBK1 TAF2 THR4 YIH1 TAH1 RAD18 PAT1 SRB8 AHC2 CSM1 YCR090C MSH3 CDC39 STE20 RIM101 ECM29 NEM1 RPN1 SLT2 PIH1 BCD1 INM1 FSH1 CIC1 SSF1 RRP4 PCL5 QNS1 LRP1 KSP1 RPF1 GAR1 YHR097C GRE3 IMP3 LIN1 DNA2 PRP8 NMD3 OYE2 CTF8 MDM31 UTP9 NBL1 SCH9 NAS2 URM1 SNL1 VID28 FAF1 RPB3 IRR1 SSM4 BCY1 CST6 NOT3 APQ12 PCL7 RHR2 VHR1 PCI8 RPN2 AIR1 CAB2 SDS3 UTP25 YIL092W YIL0…	383	1965
<A href='http://pfam.sanger.ac.uk/family?id=Pkinase_Tyr'>Pkinase_Tyr</A>	0.000146039	KCC4 SSK22 KIN82 STE20 SLT2 KSP1 SCH9 CKA1 PRK1 IKS1 BCK1 PBS2 YAK1 TPK1 HAL5 SWE1 PTK2 HSL1 PRR1 KKQ8 NNK1 PTK1 KIN2 RCK2 PHO85 SSN3 MKK2 FRK1 YPL150W RAD53 HRR25 IPL1 YPL236C DBF20	34	109
<A href='http://pfam.sanger.ac.uk/family?id=Pkinase'>Pkinase</A>	0.000146039	KCC4 SSK22 KIN82 STE20 SLT2 KSP1 SCH9 CKA1 PRK1 IKS1 BCK1 PBS2 YAK1 TPK1 HAL5 SWE1 PTK2 HSL1 PRR1 KKQ8 NNK1 PTK1 KIN2 RCK2 PHO85 SSN3 MKK2 FRK1 YPL150W RAD53 HRR25 IPL1 YPL236C DBF20	34	109
kinase activity [GO:0016301]	0.000196658	KCC4 PGK1 RBK1 SSK22 KIN82 STE20 PRS3 THR1 SLT2 YHR033W KSP1 SCH9 CKA1 PRK1 PFK26 SLN1 IKS1 TRL1 BCK1 LSB6 PBS2 YAK1 TPK1 HAL5 SWE1 UTR1 PTK2 TOR1 ADO1 HSL1 PRR1 KKQ8 NNK1 PTK1 GRC3 KIN2 CKI1 VPS34 RCK2 LCB5 STT4 YLR446W PHO85 SSN3 MKK2 FRK1 YPL150W RAD53 POS5 HRR25 IPL1 THI6 YPL236C ISR1 DBF20	55	206
phosphorylation [GO:0016310]	0.000196658	KCC4 PGK1 RBK1 SSK22 KIN82 STE20 PRS3 THR1 SLT2 YHR033W KSP1 SCH9 CKA1 PRK1 PFK26 SLN1 IKS1 TRL1 BCK1 LSB6 PBS2 YAK1 TPK1 HAL5 SWE1 UTR1 PTK2 TOR1 ADO1 HSL1 PRR1 KKQ8 NNK1 PTK1 GRC3 KIN2 CKI1 VPS34 RCK2 LCB5 STT4 YLR446W PHO85 SSN3 MKK2 FRK1 YPL150W RAD53 POS5 HRR25 IPL1 THI6 YPL236C ISR1 DBF20	55	206
protein kinase activity [GO:0004672]	0.000298372	KCC4 SSK22 KIN82 STE20 SLT2 KSP1 SCH9 CKA1 PRK1 IKS1 BCK1 PBS2 YAK1 TPK1 HAL5 SWE1 PTK2 TOR1 HSL1 PRR1 KKQ8 NNK1 PTK1 KIN2 VPS34 RCK2 PHO85 SSN3 MKK2 FRK1 YPL150W RAD53 HRR25 IPL1 YPL236C ISR1 DBF20	37	126
protein serine/threonine kinase activity [GO:0004674]	0.000323021	KCC4 SSK22 KIN82 STE20 SLT2 KSP1 SCH9 CKA1 PRK1 IKS1 BCK1 PBS2 YAK1 TPK1 HAL5 SWE1 PTK2 TOR1 HSL1 PRR1 KKQ8 NNK1 PTK1 KIN2 RCK2 PHO85 SSN3 MKK2 FRK1 YPL150W RAD53 HRR25 IPL1 YPL236C ISR1 DBF20	36	122
protein transport [GO:0015031]	0.000393126	STP22 ATG22 SED4 SFB3 SBE22 CHS7 NMD3 INP51 TIM44 NEO1 SEC6 SEC28 SEC24 NUP159 APS3 VPS53 SNX4 NUP192 NSP1 YJL049W PEP8 TIM54 NUP82 EXO70 CHS6 PAM16 VPS35 ATG27 RCY1 LAA1 OPT1 APL1 RAV1 NUP85 VPS55 ENT3 VPS70 NMD5 HOT13 LST4 PTR2 POM33 ATG10 PAM18 POM34 SNF7 TRX1 PER33 BOS1 PEP3 SEC10 SEC13 VPS34 SEC22 GSP1 KAP95 SEC61 IKI3 VAC14 VPS33 VPS36 ATG23 SNF8 RET3 EGD1 VPS16 TIM50 VPS28 BRO1 SEC16 ELP3 …	89	379
fungal-type cell wall organization [GO:0031505]	0.000419549	CWH43 PRS3 SLT2 SBE22 ECM14 SVP26 IRR1 KTR7 SIM1 ATG32 MHP1 BIT61 CIS3 KRE9 ECM25 GPI14 TOR1 CDC11 SOD1 ECM27 MET5 MYO3 IRS4 ECM4 YPS1 YLR194C MID2 CSR1 CCW14 TUS1 CNA1 ECM7 PHO85 RLM1 TCO89 CSR2 KRE6	37	128
protein phosphorylation [GO:0006468]	0.000454428	KCC4 SSK22 KIN82 STE20 SLT2 KSP1 SCH9 CKA1 PRK1 MOB1 CTK2 IKS1 BCK1 PBS2 YAK1 TPK1 HAL5 SWE1 PTK2 HSL1 PRR1 KKQ8 NNK1 PTK1 KIN2 VPS34 RCK2 PHO85 SSN3 MKK2 FRK1 YPL150W RAD53 HRR25 IPL1 YPL236C ISR1 DBF20	38	133
protein tyrosine kinase activity [GO:0004713]	0.000463397	BCK1 PBS2 YAK1 SWE1 MKK2 RAD53	6	8
YOR080W (DIA2)	0.000466054	DED81 SLT2 CIC1 SSZ1 SSF1 NMD3 UTP10 YAK1 LST4 COF1 MCM5 RRP12 TIF6 CTF4	14	33
Complex Number 82 [550.2.82]	0.000671077	DED81 SLT2 CIC1 SSZ1 SSF1 NMD3 UTP10 YAK1 LST4 COF1 MCM5 RRP12 TIF6 CTF4	14	34
methionine metabolic process [GO:0006555]	0.000727722	THR1 MET18 MET3 HOM6 SAM1 MET17 MET12 MET16	8	14
nitrogen compound metabolic process [GO:0006807]	0.000727722	QNS1 NIT1 YIL165C NIT2 URA2 CPS1 NTA1 CPA2	8	14
ER-golgi transport vesicles [745.01]	0.000727722	SFB3 SEC24 BOS1 SEC13 SEC22 SEC16 SAR1 SEC23	8	14
Table S2c: Dosage compensated genes (Genes in Class 3a AND lower-than-expected in both 4A and 4B)
Category	p-value	In Category from Cluster	k	f
translation [GO:0006412]	5.34128e-07	RPL14B RPS20 RPL8A DIA4 DED81 YHR020W RPS4B RPL15A RPS0B RPL22A MEF1 RPL10 RPS31 YEF3 RPS28B GUF1 GCD7 RPL38 RPP0 NAM2 RPS29A MRPL4 RPS1A RPL6B TAE2 MRPS16 RPS6A MRPL40 NAB3 RPL7B RPL11A	31	318
intracellular [GO:0005622]	8.90871e-06	RPL14B RPS20 GGA2 RTT107 RPS4B COF1 RPL15A RPS0B RPL22A MEF1 RPL10 ACE2 ACF2 RPS31 RPS28B CDC25 RPL38 RPP0 ROM2 STP3 RPS29A SFP1 SPP382 TUS1 RPS1A RPL6B MRPS16 RPS6A MRPL40 RPL7B YPR013C RPL11A	32	381
ribosomal proteins [12.01.01]	3.39729e-05	RPL14B RPS20 RPL8A RPS4B RPL15A RPS0B RPL22A RPL10 RPS31 RPS28B MRPL15 RPL38 RPP0 RPS29A MRPL4 RPS1A RPL6B MRPS16 RPS6A MRPL40 RPL7B RPL11A RRP15	23	246
mitochondrion [GO:0005739]	3.42277e-05	QCR10 LEU5 DIA4 MAS2 COX6 SAM35 TOM71 MSH1 YCK1 GND1 KOG1 BAT1 DNM1 MMM1 COX17 PUF3 SDH2 COX12 PET309 MEF1 CSF1 ALT1 GEP5 YLR132C TAR1 MAS1 YLR164W UPS2 MMR1 UPS1 COQ9 MSS51 LIP2 SYM1 YLR253W HSP60 GUF1 GCD7 ATP14 ACO1 STT4 MRPL15 YLR346C DIC1 ILV5 NAM2 ECM19 ATP10 COX8 SPP382 TDA5 MRPL4 FMP27 MRPS16 ALD6 ATP4 MOT1 AIM43 MRPL40 COA2 BMS1 FAS2 YAH1 CCL1	64	1072
Complex Number 195 [550.2.195]	4.98637e-05	MAS2 MSH1 MAS1	3	3
copper ion import [GO:0015677]	0.000113279	FRE6 FRE1 CTR3 CTR1	4	8
ribonucleoprotein complex [GO:0030529]	0.000150791	RPL14B RPS20 RPL8A RPS4B RPL15A RPS0B RPL22A RPL10 RPS31 RPS28B MRPL15 RPL38 RPP0 RPS29A UTP21 MRPL4 RPS1A RPL6B MRPS16 RPS6A MRPL40 RPL7B SRP72 RPL11A RRP9	25	307
electron transport chain [GO:0022900]	0.000375702	QCR10 SDH2 FRE6 FRE8 YLR164W FRE1 GRX8 YAH1	8	49
aerobic respiration [02.13.03]	0.00048948	QCR10 DIA4 COX6 SDH2 COX12 PET309 YLR132C COQ9 HAP1 COX8	10	77
mitochondrial inner membrane [GO:0005743]	0.000505505	QCR10 LEU5 COX6 SDH2 PET309 YLR164W UPS2 UPS1 COQ9 MSS51 SYM1 GUF1 ATP14 DIC1 ATP10 COX8 ATP4 COA2	18	204
guanyl-nucleotide exchange factor activity [GO:0005085]	0.000673534	RIC1 GCD7 CDC25 ROM2 YLR422W TUS1	6	30
cytoplasmic ribosomal large subunit [500.40.10]	0.000736408	RPL14B RPL8A RPL15A RPL22A RPL10 RPL38 RPP0 RPL6B RPL7B RPL11A	10	81
copper ion transport [GO:0006825]	0.000999285	COX17 FRE1 CTR3 CTR1	4	13
Table S2d: Genes in Class 2a (heritably reduced expression)
rRNA processing [11.04.01]	6.89836e-05	SBP1 PIH1 RPP1 RRP3 LRP1 IPI1 GAR1 DBP8 DRS1 SOF1 FYV7 MDN1 CBF5 EMG1 HCR1 NOP56 IFH1 DBP9 TSR2	19	169
<A href='http://pfam.sanger.ac.uk/family?id=DEAD'>DEAD</A>	7.39534e-05	YHL050C RRP3 DBP8 YHR218W DRS1 YLL066C YLL067C DBP9 YLR419W YRF1-4	10	55
clathrin binding [GO:0030276]	7.52089e-05	APM2 YAP1801 ENT4 APS1 ENT2	5	12
nucleus [GO:0005634]	8.24747e-05	SHU1 YAP3 SPO11 SNF6 RIM101 SBP1 STP2 PIH1 BRL1 BCD1 SRB2 AAP1 MED6 RPP1 RRP3 TRM5 QNS1 IRE1 LRP1 STE12 IPI1 RTC3 GAR1 YNG2 TRA1 ORC6 SET1 LSM12 YHR122W NDT80 YHR127W IGO2 WSS1 RPC10 CRP1 RTT107 PRP8 CDC23 THP2 DBP8 SPC97 IKI1 MDM31 NVJ1 SCH9 SKN7 SET5 RTT109 DRS1 SOF1 DPS1 HIF1 RIX7 UBI4 LOT6 BRE2 RAD5 TRX1 STU2 IES3 SPT8 FYV7 BUD20 SIC1 SRL2 SMC4 XDJ1 GIS3 IOC2 APC9 CDC45 SEN2 MDN1 REX3 HOG1 MS…	111	1965
ATP-dependent helicase activity [GO:0008026]	0.000118131	YHL050C RRP3 DBP8 YHR218W DRS1 YLL066C YLL067C DBP9 YLR419W YRF1-4	10	58
cytoplasm [GO:0005737]	0.000317376	YAP3 PRS3 RPS20 RIM101 OCA5 GUT1 SBP1 OSH7 STP2 TDA3 ARD1 YSC84 YHR033W PIH1 BCD1 AAP1 PAN5 TRM5 OSH3 QNS1 NMD2 RTC3 MSR1 SBE22 TRR2 CDC12 UBA4 APE4 BZZ1 DMA1 COX23 LSM12 YHR122W ARP1 YHR131C IGO2 SPL2 DCD1 KEL1 TDA11 YAP1801 ATG7 SPC97 YHR182W IKI1 YHR192W PPX1 SCH9 SET5 SFI1 DPS1 FRA1 UBI4 FPS1 RPL8B MHT1 LOT6 MEU1 SNF7 RAD5 TRX1 STU2 YLR072W SIC1 SRL2 SMC4 GIS3 APC9 REX3 HOG1 SRN2 PDC5 SLX4 YL…	111	2026
1-phosphatidylinositol binding [GO:0005545]	0.000506648	OSH3 CDC12 YAP1801 CDC3	4	10
rRNA modification [11.06.01]	0.00066193	GAR1 SOF1 PUS5 CBF5 NOP56	5	18
nucleic acid binding [GO:0003676]	0.000807501	RIM101 SBP1 YHL050C STP2 BCD1 RRP3 NAM8 THP2 DBP8 YHR218W DRS1 DPS1 YLL066C YLL067C RAD5 BUD20 SEN2 REX3 MSL5 DBP9 CWC24 YLR419W YRF1-4	23	270
YBR061C (TRM7)	0.000868069	PRS3 SOD2 VMA16 MED6 FYV4	5	19
Table S2e: Genes in Class 3b + non-amplified genes in YPS1009 or NCYC strain panels with slope >1.1 and Benjhamini-Hochberg-corrected p<0.05 for linear fit with aneuploidy dose
extracellular region [GO:0005576]	4.33051e-06	FLO9 YAR066W TIP1 SPI1 FLO5 YHR214W BAR1 MUC1 PGU1 PRY2 FLO10 YLR042C CTS1 CCW14	14	95
anchored to membrane [GO:0031225]	6.47644e-06	FLO9 TIP1 SPI1 FLO5 MUC1 FLO10 YLR042C YPS1 YLR194C GAS2 CCW14	11	61
Morphology - WT	6.49893e-06	YAL065C PRX1 YBR012C YBR013C EDS1 TIP1 TEC1 GLK1 YCR101C YDL124W HSP42 ADR1 PRB1 PHM8 MEI4 AGP3 AAD6 HXK1 YFR054C HFM1 COS12 STF2 MSB2 GSC2 RTA1 YGR250C GND2 ETP1 YHL012W DUR3 AIM17 RIM4 WSC4 ECM29 YHL037C YHL042W MIP6 DOG2 YHR045W YHK8 FSH1 SSZ1 YHR078W HXT1 YHR097C GRE3 YPT35 YHR112C YHR130C NSG1 YHR138C SPO12 YSP1 LIN1 REC104 PEX18 YHR177W OYE2 CRG1 BAR1 PRM5 QDR1 MUC1 SET4 NCA3 INO1 ANB1 PGU1…	160	3667
flocculation [GO:0000128]	6.98005e-06	FLO9 FLO5 MUC1 FLO10	4	5
mannose metabolic process [GO:0006013]	0.000162623	GLK1 HXK1 AMS1	3	4
