# Supplementary material for: Dosage compensation can buffer copy-number variation in wild yeast
Source: eLife. 2015 May 8;4:e05462. doi: 10.7554/eLife.05462 (PMC4448642; doi:10.7554/eLife.05462)
Supplement: Supplementary file 3. — Genes in each class are listed on file tabs. The first two columns list gene name and annotation, while the third column lists the strain and/or analysis that the gene was identified in. (a) Amplified genes with expression proportionate to gene copy. (b) Amplified genes with lower-than-expected expression. (c) Amplified genes with higher-than-expected expression. (d) Genes in each MLR classification group—intercept (‘alpha-hat’), slope (‘beta-hat’), and posterior probabilities for each class are shown. The mean DNA and mRNA sequencing reads for each gene are also shown. (e) Unamplified genes in the strain panels with linear increases in expression across the panel (FDR = 0.05). Pooled set of amplified genes with expression proportionate to gene copy (from Figure 9). (c) Dosage compensated genes (from Figure 9). DOI: http://dx.doi.org/10.7554/eLife.05462.016 [file elife05462s003.xlsx]

## Sheet: Amp. genes - normal expression
Amplified Genes, Proportionately higher expression ("Amplified unaffected")		Identified in
YCL002C	YCL002C ... YCL002C biological process unknown molecular function unknown cellular component unknown | YCL004W	Fig 4A
YCL005W	YCL005W … LDB16 biological process unknown molecular function unknown | Protein of unknown function; null mutants have decreased net negative cell surface charge; GFP-fusion protein expression is induced in response to the DNA-damaging agent MMS; native protein is detected in purified mitochondriaYCL005W-A	Fig 4A
YCL008C	YCL008C ... STP22 protein-vacuolar targeting* protein binding endosome* | YCL009C	Fig 4A
YCL014W	YCL014W ... BUD3 cytokinesis* molecular function unknown bud neck* | YCL016C	Fig 4A
YCL018W	YCL018W ... LEU2 leucine biosynthesis 3-isopropylmalate dehydrogenase actcytosol | YCL021W-A	Fig 4A
YCL024W	YCL024W ... KCC4 protein amino acid phosphoryla protein kinase activity bud neck | YCL025C	Fig 4A
YCL025C	YCL025C ... AGP1 amino acid transport amino acid transporter activity* plasma membrane | YCL026C-A	Fig 4A
YCL026C-A	YCL026C-A ... FRM2 negative regulation of fatty a molecular function unknown cytoplasm* | YCL026C-B	Fig 4A
YCL031C	YCL031C PAC cluster RRP7 35S primary transcript process molecular function unknown nucleus* | YCL032W	Fig 4A
YCL035C	YCL035C iESR cluster GRX1 response to oxidative stress* thiol-disulfide exchange intermediacytoplasm* | YCL036W	Fig 4A
YCL038C	YCL038C ... ATG22 protein-vacuolar targeting* molecular function unknown integral to membrane* | YCL039W	Fig 4A
YCL044C	YCL044C … MGR1 biological process unknown molecular function unknown | Subunit of the mitochondrial (mt) i-AAA protease supercomplex, which degrades misfolded mitochondrial proteins; forms a subcomplex with Mgr3p that binds to substrates to facilitate proteolysis; required for growth of cells lacking mtDNAYCL045C	Fig 4A
YCL047C	YCL047C ... YCL047C biological process unknown molecular function unknown cellular component unknown | YCL048W	Fig 4A
YCL050C	YCL050C ... APA1 nucleotide metabolism bis(5'-nucleosyl)-tetraphosphatase cytoplasm* | YCL051W	Fig 4A
YCL057W	YCL057W ... PRD1 proteolysis and peptidolysis metalloendopeptidase activity* cytoplasm* | YCL058C	Fig 4A
YCL067C	YCL067C ... HMLALPHA2 regulation of transcription fr transcription corepressor activity nucleus | YCL068C	Fig 4A
YCR005C	YCR005C ... CIT2 glutamate biosynthesis* citrate (Si)-synthase activity mitochondrion* | YCR006C	Fig 4A
YCR012W	YCR012W ... PGK1 glycolysis* phosphoglycerate kinase activity cytoplasm* | YCR013C	Fig 4A
YCR015C	YCR015C ... YCR015C biological process unknown molecular function unknown cellular component unknown | YCR016W	Fig 4A
YCR017C	YCR017C ... CWH43 cell wall organization and bio molecular function unknown bud neck* | YCR018C	Fig 4A
YCR020C	YCR020C ... PET18 mitochondrion organization and molecular function unknown cellular component unknown | YCR020C-A	Fig 4A
YCR023C	YCR023C ... YCR023C biological process unknown molecular function unknown cellular component unknown | YCR024C	Fig 4A
YCR024C	YCR024C ... SLM5 protein biosynthesis asparagine-tRNA ligase activity mitochondrion | YCR024C-A	Fig 4A
YCR024C-A	YCR024C-A ... PMP1 cation transport enzyme regulator activity plasma membrane* | YCR024C-B	Fig 4A
YCR027C	YCR027C ... RHB1 L-arginine transport* GTPase activity extrinsic to plasma membrane | YCR028C	Fig 4A
YCR030C	YCR030C ... SYP1 biological process unknown molecular function unknown bud neck* | YCR031C	Fig 4A
YCR033W	YCR033W ... SNT1 histone deacetylation* NAD-dependent histone deacetylase ahistone deacetylase complex | YCR034W	Fig 4A
YCR034W	YCR034W PAC cluster FEN1 vesicle-mediated transport* fatty acid elongase activity endoplasmic reticulum* | YCR035C	Fig 4A
YCR035C	YCR035C PAC cluster RRP43 35S primary transcript process 3'-5'-exoribonuclease activity nuclear exosome (RNase complex)* | YCR036W	Fig 4A
YCR036W	YCR036W ... RBK1 D-ribose metabolism ATP binding* cytoplasm* | YCR037C	Fig 4A
YCR037C	YCR037C ... PHO87 phosphate transport inorganic phosphate transporter actmembrane | YCR038C	Fig 4A
YCR038C	YCR038C ... BUD5 pseudohyphal growth* signal transducer activity* bud neck* | YCR038W-A	Fig 4A
YCR042C	YCR042C ... TAF2 transcription initiation from general RNA polymerase II transcriptranscription factor TFIID complex | YCR043C	Fig 4A
YCR043C	YCR043C ... YCR043C biological process unknown molecular function unknown Golgi apparatus | YCR044C	Fig 4A
YCR053W	YCR053W PAC cluster THR4 endocytosis* threonine synthase activity cytoplasm* | YCR054C	Fig 4A
YCR054C	YCR054C ... CTR86 biological process unknown molecular function unknown cytoplasm | YCR057C	Fig 4A
YCR059C	YCR059C ... YIH1 regulation of amino acid metab molecular function unknown cytoplasm* | YCR060W	Fig 4A
YCR060W	YCR060W ... TAH1 protein folding chaperone binding cytoplasm* | YCR061W	Fig 4A
YCR066W	YCR066W ... RAD18 DNA repair ubiquitin conjugating enzyme activinuclear chromatin | YCR067C	Fig 4A
YCR067C	YCR067C ... SED4 ER to Golgi transport molecular function unknown endoplasmic reticulum* | YCR068W	Fig 4A
YCR069W	YCR069W ... CPR4 biological process unknown peptidyl-prolyl cis-trans isomerasemembrane | YCR071C	Fig 4A
YCR073C	YCR073C ... SSK22 protein amino acid phosphoryla MAP kinase kinase kinase activity cellular component unknown | YCR073W-A	Fig 4A
YCR075W-A	YCR075W-A ... YCR075W-A biological process unknown molecular function unknown cellular component unknown | YCR076C	Fig 4A
YCR076C	YCR076C ... YCR076C biological process unknown molecular function unknown cellular component unknown | YCR077C	Fig 4A
YCR077C	YCR077C ... PAT1 chromosome segregation* molecular function unknown cytosolic small ribosomal subunit ( | YCR079W	Fig 4A
YCR081W	YCR081W ... SRB8 negative regulation of transcr RNA polymerase II transcription medtranscription factor complex | YCR082W	Fig 4A
YCR082W	YCR082W ... AHC2 biological process unknown molecular function unknown cytoplasm* | YCR083W	Fig 4A
YCR083W	YCR083W ... TRX3 response to oxidative stress thiol-disulfide exchange intermediamitochondrion | YCR084C	Fig 4A
YCR086W	YCR086W ... CSM1 DNA replication* molecular function unknown nucleolus* | YCR087C-A	Fig 4A
YCR089W	YCR089W ... FIG2 cellular morphogenesis during molecular function unknown cell wall (sensu Fungi) | YCR090C	Fig 4A
YCR090C	YCR090C ... YCR090C biological process unknown molecular function unknown cytoplasm* | YCR091W	Fig 4A
YCR091W	YCR091W iESR cluster KIN82 protein amino acid phosphoryla protein kinase activity cellular component unknown | YCR092C	Fig 4A
YCR092C	YCR092C ... MSH3 DNA recombination* damaged DNA binding nuclear chromosome | YCR093W	Fig 4A
YCR093W	YCR093W ... CDC39 regulation of transcription fr 3'-5'-exoribonuclease activity cytoplasm* | YCR094W	Fig 4A
YCR094W	YCR094W ... CDC50 regulation of transcription* transcription regulator activity late endosome* | YCR095C	Fig 4A
YCR101C	YCR101C ... YCR101C biological process unknown molecular function unknown membrane fraction | YCR102C	Fig 4A
YHL001W	YHL001W RP cluster RPL14B protein biosynthesis structural constituent of ribosome*cytosolic large ribosomal subunit ( | YHL002C-A	Fig 4A
YHL007C	YHL007C ... STE20 protein amino acid phosphoryla protein serine/threonine kinase actincipient bud site* | YHL008C	Fig 4A
YHL011C	YHL011C PAC cluster PRS3 histidine biosynthesis* ribose-phosphate diphosphokinase accytoplasm | YHL012W	Fig 4A
YHL013C	YHL013C … PAC cluster OTU2 biological process unknown molecular function unknown | Protein of unknown function that may interact with ribosomes, based on co-purification experiments; member of the ovarian tumor-like (OTU) superfamily of predicted cysteine proteases; shows cytoplasmic localizationYHL014C	Fig 4A
YHL016C	YHL016C ... DUR3 urea transport urea transporter activity plasma membrane | YHL017W	Fig 4A
YHL017W	YHL017W ... YHL017W biological process unknown molecular function unknown clathrin-coated vesicle | YHL018W	Fig 4A
YHL039W	YHL039W PAC cluster YHL039W biological process unknown molecular function unknown cytoplasm | YHL040C	Fig 4A
YHR017W	YHR017W ... YSC83 biological process unknown molecular function unknown mitochondrion | YHR018C	Fig 4A
YHR019C	YHR019C PAC cluster DED81 asparaginyl-tRNA aminoacylatio ATP binding* cytoplasm | YHR020W	Fig 4A
YHR020W	YHR020W PAC cluster YHR020W tRNA aminoacylation for protei proline-tRNA ligase activity cellular component unknown | YHR021C	Fig 4A
YHR022C	YHR022C ... YHR022C biological process unknown molecular function unknown cellular component unknown | YHR022C-A	Fig 4A
YHR026W	YHR026W PAC cluster PPA1 vacuolar acidification hydrogen-transporting ATPase activiintegral to membrane* | YHR027C	Fig 4A
YHR027C	YHR027C ... RPN1 ubiquitin-dependent protein ca endopeptidase activity* cytoplasm* | YHR028C	Fig 4A
YHR030C	YHR030C ... SLT2 cell wall organization and bio MAP kinase activity cytoplasm* | YHR031C	Fig 4A
YHR033W	YHR033W ... YHR033W biological process unknown molecular function unknown cytoplasm | YHR034C	Fig 4A
YHR039C	YHR039C ... MSC7 meiotic recombination molecular function unknown endoplasmic reticulum | YHR039C-A	Fig 4A
YHR042W	YHR042W PAC cluster NCP1 ergosterol biosynthesis electron transporter activity mitochondrion* | YHR043C	Fig 4A
YHR045W	YHR045W ... YHR045W biological process unknown molecular function unknown endoplasmic reticulum | YHR046C	Fig 4A
YHR046C	YHR046C ... INM1 inositol phosphate dephosphory inositol-1(or 4)-monophosphatase accytoplasm* | YHR047C	Fig 4A
YHR050W	YHR050W ... SMF2 manganese ion transport "di-, tri-valent inorganic cation tr"mitochondrion* | YHR050W-A	Fig 4A
YHR050W-A	YHR050W-A ... YHR050W-A biological process unknown molecular function unknown cellular component unknown | YHR051W	Fig 4A
YHR052W	YHR052W PAC cluster CIC1 ribosomal large subunit biogen "protein binding, bridging" nucleolus* | YHR052W-A	Fig 4A
YHR053C	YHR053C ... CUP1-1 response to copper ion copper ion binding cytosol | YHR054C	Fig 4A
YHR060W	YHR060W ... VMA22 protein complex assembly* unfolded protein binding endoplasmic reticulum membrane | YHR061C	Fig 4A
YHR064C	YHR064C PAC cluster SSZ1 protein biosynthesis unfolded protein binding cytoplasm | YHR065C	Fig 4A
YHR068W	YHR068W PAC cluster DYS1 hypusine biosynthesis from pep "transferase activity, transferring"cytoplasm | YHR069C	Fig 4A
YHR069C	YHR069C ... RRP4 35S primary transcript process 3'-5'-exoribonuclease activity nuclear exosome (RNase complex)* | YHR069C-A	Fig 4A
YHR069C-A	YHR069C-A | YHR070C-A	Fig 4A
YHR072W	YHR072W ... ERG7 ergosterol biosynthesis lanosterol synthase activity endoplasmic reticulum* | YHR072W-A	Fig 4A
YHR082C	YHR082C ... KSP1 protein amino acid phosphoryla protein serine/threonine kinase actnucleus | YHR083W	Fig 4A
YHR088W	YHR088W PAC cluster RPF1 ribosomal large subunit assemb rRNA primary transcript binding nucleolus | YHR089C	Fig 4A
YHR097C	YHR097C iESR cluster YHR097C biological process unknown molecular function unknown cytoplasm* | YHR098C	Fig 4A
YHR098C	YHR098C ... SFB3 ER to Golgi transport molecular function unknown endoplasmic reticulum* | YHR099W	Fig 4A
YHR100C	YHR100C … GEP4 biological process unknown molecular function unknown | Protein of unknown function required for respiratory growth; detected in highly purified mitochondria in high-throughput studies; null mutation confers sensitivity to tunicamycin and DTT and decreased levels of phosphatidylethanolYHR101C	Fig 4A
YHR101C	YHR101C ... BIG1 cell wall biosynthesis (sensu molecular function unknown endoplasmic reticulum* | YHR102W	Fig 4A
YHR104W	YHR104W iESR cluster GRE3 response to stress* aldo-keto reductase activity* cytoplasm* | YHR105W	Fig 4A
YHR112C	YHR112C iESR cluster YHR112C sulfur metabolism cystathionine beta-lyase activity cytoplasm | YHR113W	Fig 4A
YHR123W	YHR123W ... EPT1 phosphatidylethanolamine biosy ethanolaminephosphotransferase actiendoplasmic reticulum | YHR124W	Fig 4A
YHR130C	YHR130C | YHR131C	Fig 4A
YHR132C	YHR132C ... ECM14 cell wall organization and bio metalloendopeptidase activity vacuole (sensu Fungi) | YHR132W-A	Fig 4A
YHR133C	YHR133C PAC cluster NSG1 biological process unknown molecular function unknown cellular component unknown | YHR134W	Fig 4A
YHR141C	YHR141C RP cluster RPL42B protein biosynthesis structural constituent of ribosome cytosolic large ribosomal subunit ( | YHR142W	Fig 4A
YHR142W	YHR142W ... CHS7 ER to Golgi transport* molecular function unknown endoplasmic reticulum membrane | YHR143W	Fig 4A
YHR148W	YHR148W PAC cluster IMP3 rRNA modification* snoRNA binding small nucleolar ribonucleoprotein c | YHR149C	Fig 4A
YHR151C	YHR151C … MTC6 biological process unknown molecular function unknown | Protein of unknown function; mtc6 is synthetically sick with cdc13-1YHR152W	Fig 4A
YHR156C	YHR156C ... LIN1 biological process unknown protein binding nucleus* | YHR157W	Fig 4A
YHR161C	YHR161C ... YAP1801 endocytosis clathrin binding actin cortical patch | YHR162W	Fig 4A
YHR170W	YHR170W PAC cluster NMD3 ribosomal large subunit assemb protein binding* cytosol* | YHR171W	Fig 4A
YHR175W	YHR175W ... CTR2 intracellular copper ion trans copper uptake transporter activity*vacuolar membrane (sensu Fungi) | YHR175W-A	Fig 4A
YHR179W	YHR179W ... OYE2 biological process unknown NADPH dehydrogenase activity cytoplasm* | YHR180C-B	Fig 4A
YHR181W	YHR181W ... SVP26 biological process unknown molecular function unknown endoplasmic reticulum | YHR182C-A	Fig 4A
YHR188C	YHR188C ... GPI16 attachment of GPI anchor to pr GPI-anchor transamidase activity GPI-anchor transamidase complex | YHR189W	Fig 4A
YHR191C	YHR191C ... CTF8 mitotic sister chromatid cohes molecular function unknown DNA replication factor C complex | YHR192W	Fig 4A
YHR196W	YHR196W PAC cluster UTP9 processing of 20S pre-rRNA snoRNA binding nucleus* | YHR197W	Fig 4A
YHR199C-A	YHR199C-A … NBL1 biological process unknown molecular function unknown | Subunit of the conserved chromosomal passenger complex (CPC; Ipl1p-Sli15p-Bir1p-Nbl1p), which regulates mitotic chromosome segregation; not required for the kinase activity of the complex; mediates the interaction of Sli15p and Bir1pYHR200W	Fig 4A
YHR204W	YHR204W ... MNL1 ER-associated protein cataboli carbohydrate binding endoplasmic reticulum | YHR205W	Fig 4A
YIL001W	YIL001W ... YIL001W biological process unknown molecular function unknown cytoplasm | YIL002C	Fig 4A
YIL002C	YIL002C ... INP51 cell wall organization and bio inositol-polyphosphate 5-phosphatasmembrane fraction | YIL002W-A	Fig 4A
YIL003W	YIL003W ... CFD1 iron-sulfur cluster assembly ATPase activity cytoplasm | YIL004C	Fig 4A
YIL005W	YIL005W ... EPS1 protein-ER retention protein disulfide isomerase activitendoplasmic reticulum membrane | YIL006W	Fig 4A
YIL006W	YIL006W … YIA6 transport* transporter activity* | Mitochondrial NAD+ transporter, involved in the transport of NAD+ into the mitochondria (see also YEA6); member of the mitochondrial carrier subfamily; disputed role as a pyruvate transporter; has putative mouse and human orthologsYIL007C	Fig 4A
YIL007C	YIL007C ... NAS2 ubiquitin-dependent protein ca molecular function unknown cytoplasm | YIL008W	Fig 4A
YIL008W	YIL008W ... URM1 protein modification protein binding* cytoplasm* | YIL009C-A	Fig 4A
YIL009W	YIL009W ... FAA3 lipid metabolism* long-chain-fatty-acid-CoA ligase accellular component unknown | YIL010W	Fig 4A
YIL011W	YIL011W ... TIR3 biological process unknown molecular function unknown cell wall (sensu Fungi) | YIL012W	Fig 4A
YIL013C	YIL013C ... PDR11 sterol transport "ATPase activity, coupled to transme"membrane | YIL014C-A	Fig 4A
YIL014W	YIL014W ... MNT3 O-linked glycosylation "alpha-1,3-mannosyltransferase activ"cellular component unknown | YIL015W	Fig 4A
YIL016W	YIL016W ... SNL1 nuclear pore organization and molecular function unknown mitochondrion* | YIL017C	Fig 4A
YIL017C	YIL017C ... VID28 negative regulation of glucone molecular function unknown cytoplasm* | YIL018W	Fig 4A
YIL019W	YIL019W PAC cluster FAF1 processing of 20S pre-rRNA molecular function unknown cytoplasm* | YIL020C	Fig 4A
YIL020C	YIL020C PAC cluster HIS6 histidine biosynthesis 1-(5-phosphoribosyl)-5-[(5-phosphorintracellular | YIL020C-A	Fig 4A
YIL021W	YIL021W PAC cluster RPB3 transcription from RNA polymer DNA-directed RNA polymerase activit"DNA-directed RNA polymerase II, cor" | YIL022W	Fig 4A
YIL022W	YIL022W ... TIM44 mitochondrial matrix protein i protein transporter activity mitochondrial matrix* | YIL023C	Fig 4A
YIL023C	YIL023C … YKE4 biological process unknown molecular function unknown | Zinc transporter; localizes to the ER; null mutant is sensitive to calcofluor white, leads to zinc accumulation in cytosol; ortholog of the mouse KE4 and member of the ZIP (ZRT, IRT-like Protein) familyYIL024C	Fig 4A
YIL024C	YIL024C ... YIL024C biological process unknown molecular function unknown cellular component unknown | YIL025C	Fig 4A
YIL026C	YIL026C ... IRR1 mitotic sister chromatid cohes protein binding nuclear cohesin complex | YIL027C	Fig 4A
YIL029C	YIL029C ... YIL029C biological process unknown molecular function unknown cellular component unknown | YIL029W-A	Fig 4A
YIL030C	YIL030C ... SSM4 mRNA polyadenylylation ubiquitin-protein ligase activity nuclear membrane* | YIL030W-A	Fig 4A
YIL033C	YIL033C ... BCY1 response to stress* cAMP-dependent protein kinase inhibcytoplasm* | YIL034C	Fig 4A
YIL035C	YIL035C ... CKA1 protein amino acid phosphoryla protein kinase CK2 activity protein kinase CK2 complex | YIL036W	Fig 4A
YIL036W	YIL036W ... CST6 transcription initiation from specific RNA polymerase II transcrinucleus | YIL037C	Fig 4A
YIL038C	YIL038C ... NOT3 regulation of transcription fr 3'-5'-exoribonuclease activity cytoplasm* | YIL039W	Fig 4A
YIL040W	YIL040W ... APQ12 mRNA-nucleus export molecular function unknown endoplasmic reticulum* | YIL041W	Fig 4A
YIL041W	YIL041W ... GVP36 biological process unknown molecular function unknown cytoplasm | YIL042C	Fig 4A
YIL043C	YIL043C ... CBR1 electron transport cytochrome-b5 reductase activity mitochondrion* | YIL044C	Fig 4A
YIL044C	YIL044C ... AGE2 ER to Golgi transport* ARF GTPase activator activity clathrin-coated vesicle | YIL045W	Fig 4A
YIL045W	YIL045W iESR cluster PIG2 biological process unknown protein phosphatase regulator activcytoplasm | YIL046W	Fig 4A
YIL046W-A	YIL046W-A ... YIL046W-A biological process unknown molecular function unknown cellular component unknown | YIL047C	Fig 4A
YIL048W	YIL048W ... NEO1 retrograde transport, Golgi to phospholipid-translocating ATPase aendoplasmic reticulum membrane* | YIL049W	Fig 4A
YIL049W	YIL049W ... DFG10 pseudohyphal growth molecular function unknown cellular component unknown | YIL050W	Fig 4A
YIL050W	YIL050W ... PCL7 regulation of glycogen biosynt cyclin-dependent protein kinase regcyclin-dependent protein kinase hol | YIL051C	Fig 4A
YIL053W	YIL053W ... RHR2 response to osmotic stress* glycerol-1-phosphatase activity cytoplasm* | YIL054W	Fig 4A
YIL056W	YIL056W … VHR1 biological process unknown molecular function unknown | Transcriptional activator, required for the vitamin H-responsive element (VHRE) mediated induction of VHT1 (Vitamin H transporter) and BIO5 (biotin biosynthesis intermediate transporter) in response to low biotin concentrationsYIL057C	Fig 4A
YIL064W	YIL064W … SEE1 biological process unknown S-adenosylmethionine-dependent | Protein with a role in intracellular transport; has sequence similarity to S-adenosylmethionine-dependent methyltransferases of the seven beta-strand familyYIL065C	Fig 4A
YIL065C	YIL065C ... FIS1 mitochondrial fission molecular function unknown mitochondrial outer membrane | YIL066C	Fig 4A
YIL066C	YIL066C ... RNR3 DNA replication ribonucleoside-diphosphate reductascytoplasm* | YIL066W-A	Fig 4A
YIL067C	YIL067C ... YIL067C biological process unknown molecular function unknown vacuole (sensu Fungi) | YIL068C	Fig 4A
YIL068C	YIL068C ... SEC6 cytokinesis* protein binding bud tip* | YIL068W-A	Fig 4A
YIL071C	YIL071C ... PCI8 protein deneddylation molecular function unknown signalosome complex | YIL071W-A	Fig 4A
YIL074C	YIL074C ... SER33 serine family amino acid biosy phosphoglycerate dehydrogenase acticytoplasm | YIL075C	Fig 4A
YIL075C	YIL075C ... RPN2 ubiquitin-dependent protein ca endopeptidase activity* nucleus* | YIL076W	Fig 4A
YIL076W	YIL076W ... SEC28 ER to Golgi transport* molecular function unknown COPI vesicle coat | YIL077C	Fig 4A
YIL077C	YIL077C ... YIL077C biological process unknown molecular function unknown mitochondrion | YIL078W	Fig 4A
YIL078W	YIL078W PAC cluster THS1 protein biosynthesis threonine-tRNA ligase activity cytoplasm* | YIL079C	Fig 4A
YIL079C	YIL079C PAC cluster AIR1 mRNA-nucleus export* molecular function unknown nucleus* | YIL082W	Fig 4A
YIL083C	YIL083C … CAB2 coenzyme A biosynthesis phosphopantothenate-cysteine l | Probable phosphopantothenoylcysteine synthetase (PPCS), which catalyzes the second step of coenzyme A biosynthesis from pantothenate; null mutant lethality is complemented by E. coli coaBC (encoding a bifunctional enzyme with PPCS activity)YIL084C	Fig 4A
YIL084C	YIL084C ... SDS3 chromatin silencing* protein binding histone deacetylase complex | YIL085C	Fig 4A
YIL085C	YIL085C ... KTR7 cell wall organization and bio mannosyltransferase activity Golgi apparatus | YIL086C	Fig 4A
YIL089W	YIL089W ... YIL089W biological process unknown molecular function unknown cellular component unknown | YIL090W	Fig 4A
YIL090W	YIL090W ... ICE2 ER organization and biogenesis molecular function unknown endoplasmic reticulum | YIL091C	Fig 4A
YIL091C	YIL091C ... YIL091C biological process unknown RNA helicase activity nucleus* | YIL092W	Fig 4A
YIL092W	YIL092W ... YIL092W biological process unknown molecular function unknown cytoplasm* | YIL093C	Fig 4A
YIL094C	YIL094C ... LYS12 lysine biosynthesis homoisocitrate dehydrogenase activicytoplasm* | YIL095W	Fig 4A
YIL095W	YIL095W ... PRK1 protein amino acid phosphoryla protein serine/threonine kinase actactin cortical patch | YIL096C	Fig 4A
YIL096C	YIL096C PAC cluster YIL096C biological process unknown molecular function unknown nucleus* | YIL097W	Fig 4A
YIL097W	YIL097W iESR cluster FYV10 negative regulation of glucone molecular function unknown cytoplasm* | YIL098C	Fig 4A
YIL098C	YIL098C ... FMC1 protein complex assembly molecular function unknown mitochondrion | YIL099W	Fig 4A
YIL103W	YIL103W ... DPH1 peptidyl-diphthamide biosynthe molecular function unknown cytoplasm | YIL104C	Fig 4A
YIL104C	YIL104C PAC cluster SHQ1 snoRNA metabolism molecular function unknown nucleoplasm | YIL105C	Fig 4A
YIL105C	YIL105C ... SLM1 actin cytoskeleton organizatio phosphoinositide binding cytoplasm* | YIL105W-A	Fig 4A
YIL106W	YIL106W ... MOB1 protein amino acid phosphoryla kinase regulator activity bud neck* | YIL107C	Fig 4A
YIL107C	YIL107C iESR cluster PFK26 fructose 2,6-bisphosphate meta 6-phosphofructo-2-kinase activity cytoplasm | YIL108W	Fig 4A
YIL108W	YIL108W ... YIL108W proteolysis and peptidolysis metalloendopeptidase activity cytoplasm | YIL109C	Fig 4A
YIL109C	YIL109C ... SEC24 ER to Golgi transport* protein binding COPII vesicle coat | YIL110W	Fig 4A
YIL110W	YIL110W … PAC cluster MNI1 biological process unknown S-adenosylmethionine-dependent | Putative S-adenosylmethionine-dependent methyltransferase of the seven beta-strand family; deletion mutant exhibits a weak vacuolar protein sorting defect, enhanced resistance to caspofungin, and is synthetically lethal with MEN mutantsYIL111W	Fig 4A
YIL111W	YIL111W ... COX5B mitochondrial electron transpo cytochrome-c oxidase activity respiratory chain complex IV (sensu | YIL112W	Fig 4A
YIL112W	YIL112W ... HOS4 histone deacetylation* NAD-dependent histone deacetylase ahistone deacetylase complex | YIL113W	Fig 4A
YIL114C	YIL114C ... POR2 ion transport voltage-gated ion-selective channelmitochondrion* | YIL115C	Fig 4A
YIL115C	YIL115C ... NUP159 mRNA-nucleus export* structural molecule activity nuclear pore | YIL115W-A	Fig 4A
YIL116W	YIL116W ... HIS5 histidine biosynthesis histidinol-phosphate transaminase aintracellular | YIL117C	Fig 4A
YIL118W	YIL118W ... RHO3 actin filament organization* GTPase activity* intracellular | YIL119C	Fig 4A
YIL120W	YIL120W iESR cluster QDR1 multidrug transport multidrug transporter activity* plasma membrane* | YIL121W	Fig 4A
YIL123W	YIL123W ... SIM1 microtubule cytoskeleton organ molecular function unknown cell wall (sensu Fungi) | YIL124W	Fig 4A
YIL124W	YIL124W iESR cluster AYR1 phosphatidic acid biosynthesis acylglycerone-phosphate reductase acytoplasm* | YIL125W	Fig 4A
YIL125W	YIL125W ... KGD1 tricarboxylic acid cycle* oxoglutarate dehydrogenase (succinymitochondrial matrix* | YIL126W	Fig 4A
YIL126W	YIL126W ... STH1 meiosis* ATPase activity* RSC complex | YIL127C	Fig 4A
YIL127C	YIL127C … PAC cluster RRT14 biological process unknown molecular function unknown | Putative protein of unknown function; identified in a screen for mutants with decreased levels of rDNA transcription; green fluorescent protein (GFP)-fusion protein localizes to the nucleolus; predicted to be involved in ribosome biogenesisYIL128W	Fig 4A
YIL128W	YIL128W ... MET18 transcription from RNA polymer RNA polymerase II transcription facnucleoplasm | YIL129C	Fig 4A
YIL129C	YIL129C ... TAO3 cellular morphogenesis* molecular function unknown mitochondrion* | YIL130W	Fig 4A
YIL130W	YIL130W ... ASG1 biological process unknown molecular function unknown nucleus | YIL131C	Fig 4A
YIL131C	YIL131C ... FKH1 pseudohyphal growth* transcription factor activity nucleus | YIL132C	Fig 4A
YIL132C	YIL132C ... CSM2 meiotic chromosome segregation molecular function unknown cytoplasm* | YIL133C	Fig 4A
YIL134W	YIL134W ... FLX1 FAD transport FAD transporter activity mitochondrion | YIL135C	Fig 4A
YIL135C	YIL135C ... VHS2 G1/S transition of mitotic cel molecular function unknown cytoplasm | YIL136W	Fig 4A
YIL137C	YIL137C … TMA108 (RBF108) proteolysis and peptidolysis metalloendopeptidase activity cytoplasm | Protein that associates with ribosomes; putative metalloproteaseYIL138C	Fig 4A
YIL138C	YIL138C ... TPM2 actin filament organization* actin lateral binding contractile ring (sensu Saccharomyc | YIL139C	Fig 4A
YIL140W	YIL140W ... AXL2 bud site selection* molecular function unknown bud neck* | YIL141W	Fig 4A
YIL142W	YIL142W ... CCT2 protein folding* unfolded protein binding cytoplasm* | YIL143C	Fig 4A
YIL143C	YIL143C ... SSL2 transcription initiation from general RNA polymerase II transcriptranscription factor TFIIH complex* | YIL144W	Fig 4A
YIL144W	YIL144W ... TID3 chromosome segregation* structural constituent of cytoskelecondensed nuclear chromosome kineto | YIL145C	Fig 4A
YIL146C	YIL146C ... ECM37 cell wall organization and bio molecular function unknown cellular component unknown | YIL147C	Fig 4A
YIL147C	YIL147C ... SLN1 protein amino acid phosphoryla osmosensor activity* plasma membrane | YIL148W	Fig 4A
YIL149C	YIL149C ... MLP2 mRNA-nucleus export* ribonucleoprotein binding mitochondrion* | YIL150C	Fig 4A
YIL150C	YIL150C ... MCM10 DNA replication initiation* chromatin binding nucleus | YIL151C	Fig 4A
YIL151C	YIL151C ... YIL151C biological process unknown molecular function unknown cellular component unknown | YIL152W	Fig 4A
YIL152W	YIL152W ... YIL152W biological process unknown molecular function unknown cellular component unknown | YIL153W	Fig 4A
YIL155C	YIL155C ... GUT2 carbohydrate metabolism* glycerol-3-phosphate dehydrogenase mitochondrion | YIL156W	Fig 4A
YIL156W	YIL156W ... UBP7 protein deubiquitination ubiquitin-specific protease activitcytoplasm | YIL156W-A	Fig 4A
YIL156W-B	YIL156W-B | YIL157C	Fig 4A
YIL158W	YIL158W … AIM20 biological process unknown molecular function unknown | Putative protein of unknown function; overexpression causes a cell cycle delay or arrest; green fluorescent protein (GFP)-fusion protein localizes to the vacuole; null mutant displays elevated frequency of mitochondrial genome lossYIL159W	Fig 4A
YIL159W	YIL159W ... BNR1 actin filament organization* cytoskeletal protein binding contractile ring (sensu Saccharomyc | YIL160C	Fig 4A
YIL161W	YIL161W ... YIL161W biological process unknown molecular function unknown cytoplasm | YIL162W	Fig 4A
YIL164C	YIL164C ... NIT1 biological process unknown nitrilase activity cellular component unknown | YIL165C	Fig 4A
YIL165C	YIL165C ... YIL165C biological process unknown molecular function unknown cellular component unknown | YIL166C	Fig 4A
YIR001C	YIR001C ... SGN1 mRNA metabolism poly(A) binding cytoplasm | YIR002C	Fig 4A
YIR002C	YIR002C ... MPH1 DNA repair RNA helicase activity* nucleus | YIR003W	Fig 4A
YIR003W	YIR003W … AIM21 biological process unknown molecular function unknown | Protein of unknown function; may interact with ribosomes; GFP-fusion protein colocalizes with Sac1p to the actin cytoskeleton; YIR003W is not an essential gene; null mutant displays elevated frequency of mitochondrial genome lossYIR004W	Fig 4A
YIR004W	YIR004W ... DJP1 peroxisome matrix protein impo chaperone binding cytosol | YIR005W	Fig 4A
YIR007W	YIR007W ... YIR007W biological process unknown molecular function unknown cytoplasm | YIR008C	Fig 4A
YIR008C	YIR008C ... PRI1 DNA replication initiation* alpha DNA polymerase activity alpha DNA polymerase:primase comple | YIR009W	Fig 4A
YIR009W	YIR009W ... MSL1 nuclear mRNA splicing, via spl RNA binding snRNP U2 | YIR010W	Fig 4A
YIR010W	YIR010W ... DSN1 chromosome segregation molecular function unknown kinetochore* | YIR011C	Fig 4A
YIR011C	YIR011C ... STS1 ubiquitin-dependent protein ca molecular function unknown nucleus | YIR012W	Fig 4A
YIR012W	YIR012W PAC cluster SQT1 ribosomal large subunit assemb molecular function unknown cytoplasm* | YIR013C	Fig 4A
YIR015W	YIR015W ... RPR2 tRNA processing ribonuclease P activity nucleolar ribonuclease P complex | YIR016W	Fig 4A
YIR016W	YIR016W ... YIR016W biological process unknown molecular function unknown cellular component unknown | YIR017C	Fig 4A
YIR017C	YIR017C ... MET28 regulation of transcription fr DNA binding* nucleus | YIR017W-A	Fig 4A
YIR021W	YIR021W ... MRS1 Group I intron splicing RNA binding* mitochondrion | YIR021W-A	Fig 4A
YIR023W	YIR023W ... DAL81 regulation of transcription fr specific RNA polymerase II transcrinucleus | YIR024C	Fig 4A
YIR024C	YIR024C ... YIR024C biological process unknown molecular function unknown mitochondrion | YIR025W	Fig 4A
YIR025W	YIR025W ... MND2 mitotic sister chromatid segre molecular function unknown anaphase-promoting complex | YIR026C	Fig 4A
YIR026C	YIR026C PAC cluster YVH1 sporulation (sensu Fungi)* protein tyrosine phosphatase activicytoplasm | YIR027C	Fig 4A
YIR027C	YIR027C ... DAL1 allantoin catabolism allantoinase activity intracellular | YIR028W	Fig 4A
YIR029W	YIR029W ... DAL2 allantoin catabolism allantoicase activity cellular component unknown | YIR030C	Fig 4A
YIR031C	YIR031C ... DAL7 allantoin catabolism malate synthase activity cytoplasm | YIR032C	Fig 4A
YIR033W	YIR033W ... MGA2 positive regulation of transcr transcriptional activator activity endoplasmic reticulum membrane | YIR034C	Fig 4A
YIR034C	YIR034C ... LYS1 lysine biosynthesis, aminoadip "saccharopine dehydrogenase (NAD+, L"cytoplasm* | YIR035C	Fig 4A
YIR036C	YIR036C … IRC24 biological process unknown molecular function unknown | Putative benzil reductase;(GFP)-fusion protein localizes to the cytoplasm and is induced by the DNA-damaging agent MMS; sequence similarity with short-chain dehydrogenase/reductases; null mutant has increased spontaneous Rad52p fociYIR036W-A	Fig 4A
YIR038C	YIR038C iESR cluster GTT1 glutathione metabolism glutathione transferase activity mitochondrion* | YIR039C	Fig 4A
YJL001W	YJL001W ... PRE3 response to stress* endopeptidase activity "proteasome core complex, beta-subun" | YJL002C	Fig 4A
YJL002C	YJL002C PAC cluster OST1 N-linked glycosylation* dolichyl-diphosphooligosaccharide-poligosaccharyl transferase complex* | YJL003W	Fig 4A
YJL005W	YJL005W ... CYR1 meiosis* adenylate cyclase activity mitochondrion* | YJL006C	Fig 4A
YJL006C	YJL006C ... CTK2 protein amino acid phosphoryla cyclin-dependent protein kinase regnucleus | YJL007C	Fig 4A
YJL008C	YJL008C ... CCT8 protein folding* unfolded protein binding cytoplasm* | YJL009W	Fig 4A
YJL010C	YJL010C … NOP9 rRNA processing RNA binding | Essential subunit of U3-containing 90S preribosome involved in production of 18S rRNA and assembly of small ribosomal subunit; also part of pre-40S ribosome and required for its export into cytoplasm; binds RNA and contains pumilio domainYJL011C	Fig 4A
YJL011C	YJL011C ... RPC17 transcription initiation from DNA-directed RNA polymerase activitDNA-directed RNA polymerase III com | YJL012C	Fig 4A
YJL013C	YJL013C ... MAD3 mitotic spindle checkpoint molecular function unknown nucleus | YJL014W	Fig 4A
YJL014W	YJL014W PAC cluster CCT3 protein folding* unfolded protein binding cytoplasm* | YJL015C	Fig 4A
YJL016W	YJL016W ... YJL016W biological process unknown molecular function unknown cytoplasm | YJL019W	Fig 4A
YJL019W	YJL019W ... MPS3 mitotic sister chromatid cohes molecular function unknown integral to membrane* | YJL020C	Fig 4A
YJL023C	YJL023C ... PET130 biological process unknown molecular function unknown mitochondrion | YJL024C	Fig 4A
YJL024C	YJL024C ... APS3 vesicle-mediated transport* molecular function unknown AP-3 adaptor complex | YJL025W	Fig 4A
YJL026W	YJL026W ... RNR2 DNA replication ribonucleoside-diphosphate reductascytoplasm* | YJL027C	Fig 4A
YJL029C	YJL029C ... VPS53 Golgi to vacuole transport* molecular function unknown cytoplasm* | YJL030W	Fig 4A
YJL030W	YJL030W ... MAD2 mitotic spindle checkpoint molecular function unknown nuclear pore* | YJL031C	Fig 4A
YJL031C	YJL031C ... BET4 protein amino acid geranylgera Rab-protein geranylgeranyltransferaRab-protein geranylgeranyltransfera | YJL032W	Fig 4A
YJL033W	YJL033W PAC cluster HCA4 35S primary transcript process ATP-dependent RNA helicase activitynucleolus | YJL034W	Fig 4A
YJL034W	YJL034W ... KAR2 SRP-dependent cotranslational ATPase activity* endoplasmic reticulum lumen | YJL035C	Fig 4A
YJL035C	YJL035C ... TAD2 tRNA modification tRNA specific adenosine deaminase acytoplasm* | YJL036W	Fig 4A
YJL036W	YJL036W ... SNX4 transport* lipid binding membrane | YJL037W	Fig 4A
YJL039C	YJL039C ... NUP192 nuclear pore organization and structural constituent of nuclear pnuclear pore | YJL041W	Fig 4A
YJL041W	YJL041W ... NSP1 mRNA-nucleus export* structural molecule activity nuclear pore | YJL042W	Fig 4A
YJL042W	YJL042W ... MHP1 cell wall organization and bio structural constituent of cytoskelemicrotubule | YJL043W	Fig 4A
YJL046W	YJL046W … AIM22 biological process unknown molecular function unknown | Putative lipoate-protein ligase A family member; null mutant is viable and displays reduced frequency of mitochondrial genome lossYJL047C	Fig 4A
YJL047C	YJL047C ... RTT101 ubiquitin-dependent protein ca protein binding* cytoplasm* | YJL047C-A	Fig 4A
YJL048C	YJL048C iESR cluster UBX6 ubiquitin-dependent protein ca molecular function unknown nucleus | YJL049W	Fig 4A
YJL049W	YJL049W ... YJL049W biological process unknown molecular function unknown cellular component unknown | YJL050W	Fig 4A
YJL050W	YJL050W PAC cluster MTR4 35S primary transcript process ATP-dependent RNA helicase activitynucleus* | YJL051W	Fig 4A
YJL051W	YJL051W … IRC8 biological process unknown molecular function unknown | Bud tip localized protein of unknown function; mRNA is targeted to the bud by a She2p dependent transport system; mRNA is cell cycle regulated via Fkh2p, peaking in G2/M phase; null mutant displays increased levels of spontaneous Rad52p focYJL052C-A	Fig 4A
YJL053W	YJL053W ... PEP8 protein-Golgi retention* molecular function unknown endosome* | YJL054W	Fig 4A
YJL054W	YJL054W ... TIM54 mitochondrial inner membrane p protein transporter activity mitochondrial inner membrane protei | YJL055W	Fig 4A
YJL056C	YJL056C ... ZAP1 regulation of transcription fr DNA binding* nucleus | YJL057C	Fig 4A
YJL057C	YJL057C … iESR cluster IKS1 biological process unknown molecular function unknown | Putative serine/threonine kinase; expression is induced during mild heat stress; deletion mutants are hypersensitive to copper sulphate and resistant to sorbate; interacts with an N-terminal fragment of Sst2pYJL058C	Fig 4A
YJL058C	YJL058C ... BIT61 biological process unknown molecular function unknown cytoplasm | YJL059W	Fig 4A
YJL059W	YJL059W ... YHC3 intracellular protein transpor basic amino acid transporter activivacuole (sensu Fungi) | YJL060W	Fig 4A
YJL061W	YJL061W ... NUP82 mRNA-nucleus export* structural molecule activity nuclear pore | YJL062W	Fig 4A
YJL062W	YJL062W ... LAS21 GPI anchor biosynthesis transferase activity integral to plasma membrane* | YJL062W-A	Fig 4A
YJL066C	YJL066C iESR cluster MPM1 biological process unknown molecular function unknown mitochondrion* | YJL067W	Fig 4A
YJL068C	YJL068C iESR cluster YJL068C formaldehyde catabolism carboxylesterase activity cytosol | YJL069C	Fig 4A
YJL069C	YJL069C PAC cluster UTP18 35S primary transcript process molecular function unknown nucleolus* | YJL070C	Fig 4A
YJL070C	YJL070C ... YJL070C biological process unknown molecular function unknown cytoplasm* | YJL071W	Fig 4A
YJL071W	YJL071W ... ARG2 arginine biosynthesis* amino-acid N-acetyltransferase actimitochondrial matrix | YJL072C	Fig 4A
YJL072C	YJL072C ... PSF2 DNA-dependent DNA replication DNA binding nucleus* | YJL073W	Fig 4A
YJL073W	YJL073W ... JEM1 protein folding* unfolded protein binding* endoplasmic reticulum* | YJL074C	Fig 4A
YJL076W	YJL076W ... NET1 regulation of exit from mitosi ribosomal DNA (rDNA) binding nucleolus* | YJL077C	Fig 4A
YJL077W-A	YJL077W-A … Dubious Dubious open reading frame unlikely to encode a protein, based on available experimental and comparative sequence data; completely overlaps the verified gene YJL077C/ICS3YJL113W	Fig 4A
YJL078C	YJL078C ... PRY3 biological process unknown molecular function unknown cell wall (sensu Fungi) | YJL079C	Fig 4A
YJL079C	YJL079C ... PRY1 biological process unknown molecular function unknown endoplasmic reticulum* | YJL080C	Fig 4A
YJL080C	YJL080C PAC cluster SCP160 chromosome segregation* RNA binding endoplasmic reticulum membrane* | YJL081C	Fig 4A
YJL081C	YJL081C ... ARP4 regulation of transcription fr chromatin binding* nucleus* | YJL082W	Fig 4A
YJL082W	YJL082W ... IML2 biological process unknown molecular function unknown cytoplasm* | YJL083W	Fig 4A
YJL084C	YJL084C … ALY2 biological process unknown cyclin binding | Protein proposed to regulate the endocytosis of plasma membrane proteins; interacts with the cyclin Pcl7p and ubiquitin ligase Rsp5p; phosphorylated by the cyclin-CDK complex, Pcl7p-Pho85p; mRNA is cell cycle regulated, peaking in M phaseYJL085W	Fig 4A
YJL085W	YJL085W ... EXO70 cytokinesis* protein binding exocyst | YJL086C	Fig 4A
YJL087C	YJL087C ... TRL1 tRNA splicing* RNA ligase (ATP) activity nucleoplasm* | YJL088W	Fig 4A
YJL089W	YJL089W ... SIP4 regulation of transcription fr specific RNA polymerase II transcrinucleus | YJL090C	Fig 4A
YJL090C	YJL090C ... DPB11 DNA replication initiation* protein binding replication fork | YJL091C	Fig 4A
YJL091C	YJL091C ... GWT1 GPI anchor biosynthesis molecular function unknown membrane* | YJL092W	Fig 4A
YJL092W	YJL092W … SRS2 (HPR5) biological process unknown transcription factor activity nucleus | DNA helicase and DNA-dependent ATPase involved in DNA repair, needed for proper timing of commitment to meiotic recombination and transition from Meiosis I to II; blocks trinucleotide repeat expansion; affects genome stabilityYJL093C	Fig 4A
YJL095W	YJL095W ... BCK1 protein amino acid phosphoryla MAP kinase kinase kinase activity intracellular | YJL096W	Fig 4A
YJL098W	YJL098W ... SAP185 G1/S transition of mitotic cel protein serine/threonine phosphatascytoplasm* | YJL099W	Fig 4A
YJL099W	YJL099W ... CHS6 Golgi to plasma membrane trans molecular function unknown clathrin-coated vesicle | YJL100W	Fig 4A
YJL100W	YJL100W ... LSB6 actin filament organization* 1-phosphatidylinositol 4-kinase actcytoplasm* | YJL101C	Fig 4A
YJL101C	YJL101C ... GSH1 response to cadmium ion* glutamate-cysteine ligase activity intracellular | YJL102W	Fig 4A
YJL104W	YJL104W ... PAM16 mitochondrial matrix protein i protein binding* mitochondrion* | YJL105W	Fig 4A
YJL105W	YJL105W ... SET4 biological process unknown molecular function unknown cellular component unknown | YJL106W	Fig 4A
YJL107C	YJL107C ... YJL107C biological process unknown molecular function unknown cellular component unknown | YJL108C	Fig 4A
YJL108C	YJL108C ... PRM10 conjugation with cellular fusi molecular function unknown integral to membrane | YJL109C	Fig 4A
YJL109C	YJL109C PAC cluster UTP10 processing of 20S pre-rRNA snoRNA binding mitochondrion* | YJL110C	Fig 4A
YJL110C	YJL110C ... GZF3 negative regulation of transcr transcription factor activity* nucleus | YJL111W	Fig 4A
YJL111W	YJL111W ... CCT7 protein folding* unfolded protein binding cytoplasm* | YJL112W	Fig 4A
YJL112W	YJL112W ... MDV1 mitochondrial genome maintenan molecular function unknown mitochondrial outer membrane | YJL115W	Fig 4A
YJL115W	YJL115W ... ASF1 DNA damage response, signal tr transcription regulator activity* chromatin assembly complex | YJL116C	Fig 4A
YJL116C	YJL116C ... NCA3 mitochondrion organization and molecular function unknown cellular component unknown | YJL117W	Fig 4A
YJL117W	YJL117W ... PHO86 secretory pathway* molecular function unknown endoplasmic reticulum | YJL118W	Fig 4A
YJL122W	YJL122W … PAC cluster ALB1 biological process unknown molecular function unknown | Shuttling pre-60S factor; involved in the biogenesis of ribosomal large subunit; interacts directly with Arx1p; responsible for Tif6p recycling defects in absence of Rei1pYJL123C	Fig 4A
YJL125C	YJL125C PAC cluster GCD14 tRNA methylation tRNA methyltransferase activity nucleus | YJL126W	Fig 4A
YJL126W	YJL126W ... NIT2 biological process unknown "hydrolase activity, acting on carbo"cellular component unknown | YJL127C	Fig 4A
YJL127C	YJL127C ... SPT10 chromatin remodeling* histone acetyltransferase activity nucleus | YJL127C-B	Fig 4A
YJL128C	YJL128C ... PBS2 protein amino acid phosphoryla MAP kinase kinase activity* cytoplasm | YJL129C	Fig 4A
YJL129C	YJL129C ... TRK1 potassium ion homeostasis potassium ion transporter activity plasma membrane | YJL130C	Fig 4A
YJL130C	YJL130C ... URA2 pyrimidine base biosynthesis aspartate carbamoyltransferase acticytoplasm* | YJL131C	Fig 4A
YJL131C	YJL131C … AIM23 biological process unknown molecular function unknown | Putative protein of unknown function; the authentic non-tagged protein is detected in highly purified mitochondria; null mutant is viable, displays severe respiratory growth defect and elevated frequency of mitochondrial genome lossYJL132W	Fig 4A
YJL132W	YJL132W iESR cluster YJL132W biological process unknown molecular function unknown membrane fraction | YJL133C-A	Fig 4A
YJL133W	YJL133W ... MRS3 RNA splicing* iron ion transporter activity* mitochondrion | YJL134W	Fig 4A
YJL134W	YJL134W ... LCB3 sphingolipid biosynthesis* sphingosine-1-phosphate phosphataseendoplasmic reticulum | YJL135W	Fig 4A
YJL136C	YJL136C RP cluster RPS21B protein biosynthesis structural constituent of ribosome cytosolic small ribosomal subunit ( | YJL136W-A	Fig 4A
YJL137C	YJL137C ... GLG2 glycogen biosynthesis glycogenin glucosyltransferase acticytoplasm | YJL138C	Fig 4A
YJL139C	YJL139C ... YUR1 N-linked glycosylation* mannosyltransferase activity Golgi apparatus | YJL140W	Fig 4A
YJL140W	YJL140W ... RPB4 mRNA-nucleus export* DNA-directed RNA polymerase activitcytoplasm* | YJL141C	Fig 4A
YJL141C	YJL141C iESR cluster YAK1 protein amino acid phosphoryla protein kinase activity cytoplasm* | YJL142C	Fig 4A
YJL145W	YJL145W ... SFH5 phospholipid transport phosphatidylinositol transporter accytosol* | YJL146W	Fig 4A
YJL146W	YJL146W ... IDS2 meiosis molecular function unknown cytoplasm* | YJL147C	Fig 4A
YJL148W	YJL148W PAC cluster RPA34 transcription from RNA polymer DNA-directed RNA polymerase activitnucleus* | YJL149W	Fig 4A
YJL149W	YJL149W ... YJL149W biological process unknown molecular function unknown SCF ubiquitin ligase complex | YJL150W	Fig 4A
YJL153C	YJL153C ... INO1 myo-inositol metabolism inositol-3-phosphate synthase activcytoplasm | YJL154C	Fig 4A
YJL154C	YJL154C ... VPS35 protein-Golgi retention* molecular function unknown endosome* | YJL155C	Fig 4A
YJL155C	YJL155C iESR cluster FBP26 glucose metabolism "fructose-2,6-bisphosphate 2-phospha"cytosol | YJL156C	Fig 4A
YJL156C	YJL156C ... SSY5 sensory perception of chemical amino acid binding extrinsic to plasma membrane | YJL156W-A	Fig 4A
YJL158C	YJL158C ... CIS3 cell wall organization and bio structural constituent of cell wallendoplasmic reticulum* | YJL159W	Fig 4A
YJL162C	YJL162C ... JJJ2 biological process unknown molecular function unknown cytoplasm* | YJL163C	Fig 4A
YJL163C	YJL163C iESR cluster YJL163C biological process unknown molecular function unknown cellular component unknown | YJL164C	Fig 4A
YJL164C	YJL164C iESR cluster TPK1 protein amino acid phosphoryla protein serine/threonine kinase actcytoplasm* | YJL165C	Fig 4A
YJL165C	YJL165C ... HAL5 cation homeostasis protein kinase activity cellular component unknown | YJL166W	Fig 4A
YJL167W	YJL167W ... ERG20 ergosterol biosynthesis* dimethylallyltranstransferase activcytosol | YJL168C	Fig 4A
YJL168C	YJL168C ... SET2 regulation of transcription, D histone methyltransferase activity*nucleus | YJL169W	Fig 4A
YJL171C	YJL171C ... YJL171C biological process unknown molecular function unknown mitochondrion* | YJL172W	Fig 4A
YJL172W	YJL172W ... CPS1 proteolysis and peptidolysis* Gly-X carboxypeptidase activity vacuole (sensu Fungi) | YJL173C	Fig 4A
YJL173C	YJL173C ... RFA3 DNA recombination* DNA binding "chromosome, telomeric region*" | YJL174W	Fig 4A
YJL174W	YJL174W ... KRE9 cell wall organization and bio molecular function unknown extracellular region | YJL175W	Fig 4A
YJL176C	YJL176C ... SWI3 chromatin remodeling general RNA polymerase II transcripSWI/SNF complex* | YJL177W	Fig 4A
YJL177W	YJL177W RP cluster RPL17B protein biosynthesis structural constituent of ribosome cytosolic large ribosomal subunit ( | YJL178C	Fig 4A
YJL178C	YJL178C ... ATG27 vesicle organization and bioge protein kinase regulator activity membrane | YJL179W	Fig 4A
YJL180C	YJL180C ... ATP12 protein complex assembly unfolded protein binding mitochondrial matrix | YJL181W	Fig 4A
YJL181W	YJL181W ... YJL181W biological process unknown molecular function unknown cellular component unknown | YJL182C	Fig 4A
YJL183W	YJL183W PAC cluster MNN11 protein amino acid glycosylati "alpha-1,6-mannosyltransferase activ"mannosyltransferase complex | YJL184W	Fig 4A
YJL184W	YJL184W ... GON7 cell wall mannoprotein biosynt molecular function unknown cellular component unknown | YJL185C	Fig 4A
YJL185C	YJL185C ... YJL185C biological process unknown molecular function unknown cellular component unknown | YJL186W	Fig 4A
YJL186W	YJL186W ... MNN5 protein amino acid glycosylati "alpha-1,2-mannosyltransferase activ"Golgi apparatus | YJL187C	Fig 4A
YJL187C	YJL187C ... SWE1 G2/M transition of mitotic cel protein kinase activity nucleus* | YJL188C	Fig 4A
YJL190C	YJL190C RP cluster RPS22A protein biosynthesis structural constituent of ribosome cytosolic small ribosomal subunit ( | YJL191W	Fig 4A
YJL193W	YJL193W ... YJL193W biological process unknown molecular function unknown cellular component unknown | YJL194W	Fig 4A
YJL194W	YJL194W ... CDC6 pre-replicative complex format protein binding* pre-replicative complex | YJL195C	Fig 4A
YJL196C	YJL196C ... ELO1 fatty acid elongation, unsatur fatty acid elongase activity membrane | YJL197W	Fig 4A
YJL197W	YJL197W ... UBP12 biological process unknown ubiquitin-specific protease activitcytoplasm* | YJL198W	Fig 4A
YJL198W	YJL198W PAC cluster PHO90 phosphate transport phosphate transporter activity membrane | YJL199C	Fig 4A
YJL200C	YJL200C … ACO2 biological process unknown aconitate hydratase activity | Putative mitochondrial aconitase isozyme; similarity to Aco1p, an aconitase required for the TCA cycle; expression induced during growth on glucose, by amino acid starvation via Gcn4p, and repressed on ethanolYJL201W	Fig 4A
YJL201W	YJL201W ... ECM25 cell wall organization and bio molecular function unknown cytoplasm | YJL202C	Fig 4A
YJL203W	YJL203W ... PRP21 nuclear mRNA splicing, via spl RNA binding snRNP U2 | YJL204C	Fig 4A
YJL204C	YJL204C ... RCY1 endocytosis protein binding site of polarized growth | YJL205C	Fig 4A
YJL206C	YJL206C ... YJL206C biological process unknown molecular function unknown cellular component unknown | YJL207C	Fig 4A
YJL207C	YJL207C … LAA1 biological process unknown molecular function unknown | AP-1 accessory protein; colocalizes with clathrin to the late-Golgi apparatus; involved in TGN-endosome transport; physically interacts with AP-1; similar to the mammalian p200; may interact with ribosomes; YJL207C is a non-essential geneYJL208C	Fig 4A
YJL208C	YJL208C PAC cluster NUC1 DNA recombination* ribonuclease activity* mitochondrial inner membrane | YJL209W	Fig 4A
YJL209W	YJL209W ... CBP1 aerobic respiration* mRNA binding mitochondrion | YJL210W	Fig 4A
YJL210W	YJL210W ... PEX2 peroxisome organization and bi protein binding peroxisomal membrane | YJL211C	Fig 4A
YJL212C	YJL212C ... OPT1 sulfur metabolism oligopeptide transporter activity endoplasmic reticulum* | YJL213W	Fig 4A
YJL213W	YJL213W ... YJL213W biological process unknown molecular function unknown cellular component unknown | YJL214W	Fig 4A
YJL219W	YJL219W ... HXT9 hexose transport glucose transporter activity* plasma membrane | YJL220W	Fig 4A
YJR001W	YJR001W ... AVT1 neutral amino acid transport neutral amino acid transporter activacuole | YJR002W	Fig 4A
YJR002W	YJR002W PAC cluster MPP10 rRNA modification* molecular function unknown nucleus* | YJR003C	Fig 4A
YJR003C	YJR003C PAC cluster YJR003C biological process unknown molecular function unknown mitochondrion | YJR004C	Fig 4A
YJR004C	YJR004C ... SAG1 agglutination during conjugati cell adhesion molecule binding cell wall (sensu Fungi) | YJR005C-A	Fig 4A
YJR005W	YJR005W ... APL1 vesicle-mediated transport molecular function unknown AP-2 adaptor complex | YJR006W	Fig 4A
YJR006W	YJR006W … POL31 (HYS2) response to heat* ATPase activity endoplasmic reticulum | DNA polymerase III (delta) subunit, essential for cell viability; involved in DNA replication and DNA repairYJR007W	Fig 4A
YJR007W	YJR007W PAC cluster SUI2 translational initiation translation initiation factor activcytoplasm* | YJR008W	Fig 4A
YJR008W	YJR008W iESR cluster YJR008W biological process unknown molecular function unknown cytoplasm* | YJR009C	Fig 4A
YJR010C-A	YJR010C-A ... SPC1 signal peptide processing molecular function unknown signal peptidase complex | YJR010W	Fig 4A
YJR010W	YJR010W ... MET3 methionine metabolism* sulfate adenylyltransferase (ATP) acytoplasm* | YJR011C	Fig 4A
YJR012C	YJR012C … Essential protein of unknown function; proposed involvement in transport based on mass spectrometry analysis of copurifying proteins; partially overlaps neighboring ORF, GPI14/YJR013WYJR026W	Fig 4A
YJR013W	YJR013W ... GPI14 GPI anchor biosynthesis mannosyltransferase activity endoplasmic reticulum membrane | YJR014W	Fig 4A
YJR016C	YJR016C ... ILV3 branched chain family amino ac dihydroxy-acid dehydratase activitymitochondrion | YJR017C	Fig 4A
YJR017C	YJR017C ... ESS1 negative regulation of transcr peptidyl-prolyl cis-trans isomerasenucleus | YJR018W	Fig 4A
YJR021C	YJR021C ... REC107 meiotic recombination molecular function unknown cellular component unknown | YJR022W	Fig 4A
YJR022W	YJR022W ... LSM8 nuclear mRNA splicing, via spl RNA binding nucleus* | YJR023C	Fig 4A
YJR030C	YJR030C ... YJR030C biological process unknown molecular function unknown cellular component unknown | YJR031C	Fig 4A
YJR031C	YJR031C ... GEA1 ER to Golgi transport* ARF guanyl-nucleotide exchange factGolgi vesicle* | YJR032W	Fig 4A
YJR032W	YJR032W ... CPR7 response to stress unfolded protein binding* cytosol | YJR033C	Fig 4A
YJR033C	YJR033C ... RAV1 vacuolar acidification* molecular function unknown cytoplasm* | YJR034W	Fig 4A
YJR034W	YJR034W ... PET191 cytochrome c oxidase complex a molecular function unknown mitochondrial inner membrane | YJR035W	Fig 4A
YJR035W	YJR035W ... RAD26 nucleotide-excision repair* DNA-dependent ATPase activity nucleus | YJR036C	Fig 4A
YJR036C	YJR036C ... HUL4 protein monoubiquitination* ubiquitin-protein ligase activity cellular component unknown | YJR037W	Fig 4A
YJR039W	YJR039W ... YJR039W biological process unknown molecular function unknown mitochondrion | YJR040W	Fig 4A
YJR040W	YJR040W ... GEF1 iron ion homeostasis* voltage-gated chloride channel actiGolgi apparatus* | YJR041C	Fig 4A
YJR041C	YJR041C PAC cluster URB2 ribosome biogenesis* molecular function unknown nucleolus | YJR042W	Fig 4A
YJR042W	YJR042W ... NUP85 mRNA-nucleus export* structural molecule activity nuclear pore | YJR043C	Fig 4A
YJR043C	YJR043C PAC cluster POL32 nucleotide-excision repair* delta DNA polymerase activity nucleus* | YJR044C	Fig 4A
YJR044C	YJR044C ... VPS55 late endosome to vacuole trans molecular function unknown late endosome | YJR045C	Fig 4A
YJR046W	YJR046W ... TAH11 regulation of DNA replication molecular function unknown cytoplasm* | YJR047C	Fig 4A
YJR049C	YJR049C ... UTR1 iron ion homeostasis* NAD+ kinase activity cytoplasm* | YJR050W	Fig 4A
YJR050W	YJR050W ... ISY1 nuclear mRNA splicing, via spl "RNA splicing factor activity, trans"spliceosome complex | YJR051W	Fig 4A
YJR051W	YJR051W ... OSM1 metabolism fumarate reductase (NADH) activity mitochondrion | YJR052W	Fig 4A
YJR052W	YJR052W ... RAD7 nucleotide-excision repair, DN DNA binding* repairosome* | YJR053W	Fig 4A
YJR053W	YJR053W ... BFA1 conjugation with cellular fusi GTPase activator activity spindle pole body | YJR054W	Fig 4A
YJR054W	YJR054W ... YJR054W biological process unknown molecular function unknown vacuole (sensu Fungi) | YJR055W	Fig 4A
YJR055W	YJR055W ... HIT1 biological process unknown molecular function unknown cytoplasm* | YJR056C	Fig 4A
YJR056C	YJR056C ... YJR056C biological process unknown molecular function unknown cytoplasm* | YJR057W	Fig 4A
YJR059W	YJR059W iESR cluster PTK2 G1/S transition of mitotic cel protein kinase activity cytoplasm* | YJR060W	Fig 4A
YJR062C	YJR062C ... NTA1 protein catabolism* protein N-terminal asparagine amidomitochondrion | YJR063W	Fig 4A
YJR063W	YJR063W PAC cluster RPA12 transcription from RNA polymer DNA-directed RNA polymerase activitDNA-directed RNA polymerase I compl | YJR064W	Fig 4A
YJR064W	YJR064W PAC cluster CCT5 protein folding* unfolded protein binding cytoplasm* | YJR065C	Fig 4A
YJR066W	YJR066W iESR cluster TOR1 meiosis* protein binding* plasma membrane* | YJR067C	Fig 4A
YJR068W	YJR068W ... RFC2 mismatch repair* DNA clamp loader activity* DNA replication factor C complex | YJR069C	Fig 4A
YJR069C	YJR069C ... HAM1 DNA repair molecular function unknown cytoplasm* | YJR070C	Fig 4A
YJR072C	YJR072C ... NPA3 aerobic respiration protein binding cytoplasm | YJR073C	Fig 4A
YJR073C	YJR073C ... OPI3 phosphatidylcholine biosynthes phosphatidyl-N-methylethanolamine Nmitochondrion* | YJR074W	Fig 4A
YJR075W	YJR075W ... HOC1 cell wall mannoprotein biosynt "transferase activity, transferring"mannosyltransferase complex | YJR076C	Fig 4A
YJR076C	YJR076C ... CDC11 cell wall organization and bio structural constituent of cytoskeleprospore membrane* | YJR077C	Fig 4A
YJR082C	YJR082C ... EAF6 biological process unknown molecular function unknown nucleus* | YJR083C	Fig 4A
YJR084W	YJR084W ... CSN12 adaptation to pheromone during molecular function unknown signalosome complex | YJR085C	Fig 4A
YJR088C	YJR088C … EMC2 biological process unknown molecular function unknown | Member of a transmembrane complex required for efficient folding of proteins in the ER; null mutant displays induction of the unfolded protein responseYJR089W	Fig 4A
YJR089W	YJR089W ... BIR1 chromosome segregation molecular function unknown mitochondrion* | YJR090C	Fig 4A
YJR090C	YJR090C ... GRR1 G1/S transition of mitotic cel protein binding* cytoplasm* | YJR091C	Fig 4A
YJR091C	YJR091C ... JSN1 mRNA catabolism, deadenylylati mRNA binding cellular component unknown | YJR092W	Fig 4A
YJR092W	YJR092W ... BUD4 bud site selection* GTP binding contractile ring (sensu Saccharomyc | YJR093C	Fig 4A
YJR093C	YJR093C ... FIP1 mRNA polyadenylylation* protein binding* mRNA cleavage and polyadenylation s | YJR094C	Fig 4A
YJR094W-A	YJR094W-A RP cluster RPL43B protein biosynthesis structural constituent of ribosome cytosolic large ribosomal subunit ( | YJR095W	Fig 4A
YJR096W	YJR096W iESR cluster YJR096W arabinose catabolism* aldo-keto reductase activity* cytoplasm* | YJR097W	Fig 4A
YJR097W	YJR097W ... JJJ3 peptidyl-diphthamide biosynthe molecular function unknown cytoplasm* | YJR098C	Fig 4A
YJR098C	YJR098C ... YJR098C biological process unknown molecular function unknown cytoplasm* | YJR099W	Fig 4A
YJR099W	YJR099W ... YUH1 protein deubiquitination ubiquitin-specific protease activitcytoplasm | YJR100C	Fig 4A
YJR104C	YJR104C iESR cluster SOD1 zinc ion homeostasis* "copper, zinc superoxide dismutase a"cytosol* | YJR105W	Fig 4A
YJR105W	YJR105W ... ADO1 purine base metabolism adenosine kinase activity cytoplasm* | YJR106W	Fig 4A
YJR106W	YJR106W ... ECM27 cell wall organization and bio molecular function unknown cellular component unknown | YJR107W	Fig 4A
YJR109C	YJR109C ... CPA2 arginine biosynthesis carbamoyl-phosphate synthase (glutacarbamoyl-phosphate synthase comple | YJR110W	Fig 4A
YJR110W	YJR110W ... YMR1 vesicle-mediated transport* phosphoric monoester hydrolase acticytoplasm | YJR111C	Fig 4A
YJR111C	YJR111C ... YJR111C biological process unknown molecular function unknown mitochondrion | YJR112W	Fig 4A
YJR112W	YJR112W ... NNF1 chromosome segregation molecular function unknown kinetochore* | YJR112W-A	Fig 4A
YJR116W	YJR116W ... YJR116W biological process unknown molecular function unknown cellular component unknown | YJR117W	Fig 4A
YJR117W	YJR117W ... STE24 peptide pheromone maturation metalloendopeptidase activity* integral to endoplasmic reticulum m | YJR118C	Fig 4A
YJR122W	YJR122W … IBA57 biological process unknown molecular function unknown mitochondrion | Mitochondrial matrix protein involved in the incorporation of iron-sulfur clusters into mitochondrial aconitase-type proteins; activates the radical-SAM family members Bio2p and Lip5p; interacts with Ccr4p in the two-hybrid systemYJR123W	Fig 4A
YJR123W	YJR123W RP cluster RPS5 protein biosynthesis structural constituent of ribosome cytosolic small ribosomal subunit ( | YJR124C	Fig 4A
YJR124C	YJR124C PAC cluster YJR124C biological process unknown molecular function unknown cellular component unknown | YJR125C	Fig 4A
YJR125C	YJR125C ... ENT3 endocytosis* protein binding actin cortical patch* | YJR126C	Fig 4A
YJR126C	YJR126C ... VPS70 protein-vacuolar targeting molecular function unknown cellular component unknown | YJR127C	Fig 4A
YJR127C	YJR127C … RSF2 (ZMS1) biological process unknown molecular function unknown bud neck* | Zinc-finger protein involved in transcriptional control of both nuclear and mitochondrial genes, many of which specify products required for glycerol-based growth, respiration, and other functionsYJR128W	Fig 4A
YJR129C	YJR129C ... YJR129C biological process unknown S-adenosylmethionine-dependent methcytoplasm | YJR130C	Fig 4A
YJR130C	YJR130C ... STR2 sulfur metabolism cystathionine gamma-synthase activicytoplasm* | YJR131W	Fig 4A
YJR132W	YJR132W ... NMD5 protein-nucleus import protein carrier activity cytoplasm* | YJR133W	Fig 4A
YJR134C	YJR134C ... SGM1 biological process unknown molecular function unknown Golgi apparatus* | YJR135C	Fig 4A
YJR135C	YJR135C ... MCM22 chromosome segregation protein binding condensed nuclear chromosome kineto | YJR135W-A	Fig 4A
YJR136C	YJR136C … TTI2 protein biosynthesis molecular function unknown | Putative protein of unknown function; subunit of the ASTRA complex which is part of the chromatin remodeling machinery; similar to S. pombe Tti2p; may interact with Rsm23p; GFP-fusion protein localizes to the cytoplasmYJR137C	Fig 4A
YJR137C	YJR137C ... ECM17 cell wall organization and bio sulfite reductase (NADPH) activity cytoplasm* | YJR138W	Fig 4A
YJR138W	YJR138W ... IML1 biological process unknown molecular function unknown vacuolar membrane (sensu Fungi) | YJR139C	Fig 4A
YJR139C	YJR139C ... HOM6 methionine metabolism* homoserine dehydrogenase activity cytoplasm* | YJR140C	Fig 4A
YJR140C	YJR140C ... HIR3 G1/S-specific transcription in transcription corepressor activity nucleus | YJR141W	Fig 4A
YJR141W	YJR141W ... YJR141W mRNA processing molecular function unknown cellular component unknown | YJR142W	Fig 4A
YJR142W	YJR142W ... YJR142W biological process unknown molecular function unknown cellular component unknown | YJR143C	Fig 4A
YJR143C	YJR143C PAC cluster PMT4 O-linked glycosylation dolichyl-phosphate-mannose-protein endoplasmic reticulum | YJR144W	Fig 4A
YJR144W	YJR144W ... MGM101 DNA repair* DNA binding mitochondrial nucleoid* | YJR145C	Fig 4A
YJR148W	YJR148W ... BAT2 branched chain family amino ac branched-chain-amino-acid transamincytoplasm* | YJR149W	Fig 4A
YJR152W	YJR152W ... DAL5 allantoate transport allantoate transporter activity plasma membrane | YJR153W	Fig 4A
YJR153W	YJR153W ... PGU1 pseudohyphal growth* polygalacturonase activity extracellular region | YJR154W	Fig 4A
YJR154W	YJR154W ... YJR154W biological process unknown molecular function unknown cytoplasm | YJR155W	Fig 4A
YJR155W	YJR155W ... AAD10 aldehyde metabolism aryl-alcohol dehydrogenase activitycellular component unknown | YJR156C	Fig 4A
YKL016C	YKL016C ... ATP7 protein complex assembly* structural molecule activity* "proton-transporting ATP synthase, s" | YKL017C	Fig 4A
YKL022C	YKL022C ... CDC16 mitotic sister chromatid segre protein binding* anaphase-promoting complex | YKL023W	Fig 4A
YKL029C	YKL029C ... MAE1 pyruvate metabolism* malate dehydrogenase (oxaloacetate-mitochondrion | YKL030W	Fig 4A
YKL038W	YKL038W ... RGT1 glucose metabolism* DNA binding* nucleus | YKL039W	Fig 4A
YKL061W	YKL061W ... YKL061W biological process unknown molecular function unknown endosome | YKL062W	Fig 4A
YKL066W	YKL066W ... | YKL067W	Fig 4A
YKL084W	YKL084W ... HOT13 mitochondrial intermembrane sp molecular function unknown mitochondrial intermembrane space | YKL085W	Fig 4A
YKL091C	YKL091C iESR cluster YKL091C biological process unknown molecular function unknown nucleus | YKL092C	Fig 4A
YKL094W	YKL094W ... YJU3 biological process unknown serine hydrolase activity cytoplasm* | YKL095W	Fig 4A
YKL099C	YKL099C PAC cluster UTP11 processing of 20S pre-rRNA snoRNA binding small nucleolar ribonucleoprotein c | YKL100C	Fig 4A
YKL100C	YKL100C iESR cluster YKL100C biological process unknown molecular function unknown cellular component unknown | YKL101W	Fig 4A
YKL101W	YKL101W ... HSL1 protein amino acid phosphoryla protein kinase activity bud neck* | YKL102C	Fig 4A
YKL109W	YKL109W ... HAP4 transcription* transcriptional activator activity CCAAT-binding factor complex | YKL110C	Fig 4A
YKL113C	YKL113C ... RAD27 DNA repair* 5'-flap endonuclease activity nucleus | YKL114C	Fig 4A
YKL116C	YKL116C ... PRR1 MAPKKK cascade receptor signaling protein serine/tcytoplasm | YKL117W	Fig 4A
YKL121W	YKL121W … iESR cluster DGR2 biological process unknown molecular function unknown | Protein of unknown function; null mutant is resistant to 2-deoxy-D-glucose and displays abnormally elongated budsYKL122C	Fig 4A
YKL129C	YKL129C ... MYO3 cell wall organization and bio microfilament motor activity actin cortical patch | YKL130C	Fig 4A
YKL134C	YKL134C ... OCT1 iron ion homeostasis* metallopeptidase activity* mitochondrion | YKL135C	Fig 4A
YKL138C-A	YKL138C-A ... HSK3 mitotic spindle organization a protein binding kinetochore* | YKL139W	Fig 4A
YKL168C	YKL168C ... KKQ8 biological process unknown protein kinase activity cytoplasm | YKL169C	Fig 4A
YKL171W	YKL171W ... YKL171W proteolysis and peptidolysis protein kinase activity cytoplasm | YKL172W	Fig 4A
YKL176C	YKL176C ... LST4 vesicle-mediated transport* protein transporter activity vesicle coat | YKL177W	Fig 4A
YKL197C	YKL197C ... PEX1 peroxisome organization and bi ATPase activity peroxisome | YKL198C	Fig 4A
YKL198C	YKL198C ... PTK1 polyamine transport protein kinase activity cellular component unknown | YKL201C	Fig 4A
YKL206C	YKL206C … ADD66 biological process unknown molecular function unknown | Protein involved in 20S proteasome assembly; forms a heterodimer with Pba1p that binds to proteasome precursors; similar to human PAC2 constituent of the PAC1-PAC2 complex involved in proteasome assemblyYKL207W	Fig 4A
YKL207W	YKL207W … AIM27 biological process unknown molecular function unknown | Member of a transmembrane complex required for efficient folding of proteins in the ER; required for respiratory growth; null mutant displays induction of the unfolded protein responseYKL208W	Fig 4A
YKL209C	YKL209C ... STE6 peptide pheromone export "ATPase activity, coupled to transme"mating projection tip* | YKL210W	Fig 4A
YKL210W	YKL210W ... UBA1 ubiquitin cycle ubiquitin activating enzyme activitcytoplasm* | YKL211C	Fig 4A
YKL211C	YKL211C ... TRP3 tryptophan biosynthesis anthranilate synthase activity* cytoplasm* | YKL212W	Fig 4A
YKL215C	YKL215C ... YKL215C biological process unknown molecular function unknown cytoplasm | YKL216W	Fig 4A
YKL222C	YKL222C ... YKL222C biological process unknown molecular function unknown cellular component unknown | YKL223W	Fig 4A
YKR011C	YKR011C iESR cluster YKR011C biological process unknown molecular function unknown nucleus | YKR012C	Fig 4A
YKR013W	YKR013W ... PRY2 biological process unknown molecular function unknown vacuole (sensu Fungi)* | YKR014C	Fig 4A
YKR018C	YKR018C ... YKR018C biological process unknown molecular function unknown cytoplasm* | YKR019C	Fig 4A
YKR019C	YKR019C ... IRS4 cell wall organization and bio molecular function unknown mitochondrion | YKR020W	Fig 4A
YKR021W	YKR021W … ALY1 biological process unknown molecular function unknown | Protein proposed to regulate the endocytosis of plasma membrane proteins by recruiting the ubiquitin ligase Rsp5p to its target in the plasma membrane; green fluorescent protein (GFP)-fusion protein localizes to the cytoplasmYKR022C	Fig 4A
YKR023W	YKR023W ... YKR023W biological process unknown molecular function unknown cytoplasm* | YKR024C	Fig 4A
YKR026C	YKR026C PAC cluster GCN3 translational initiation translation initiation factor activeukaryotic translation initiation f | YKR027W	Fig 4A
YKR055W	YKR055W ... RHO4 actin filament organization* GTPase activity* intracellular | YKR056W	Fig 4A
YKR056W	YKR056W PAC cluster TRM2 tRNA modification tRNA methyltransferase activity cellular component unknown | YKR057W	Fig 4A
YKR068C	YKR068C ... BET3 ER to Golgi transport molecular function unknown Golgi apparatus* | YKR069W	Fig 4A
YKR076W	YKR076W iESR cluster ECM4 cell wall organization and bio molecular function unknown cytoplasm | YKR077W	Fig 4A
YKR080W	YKR080W ... MTD1 one-carbon compound metabolism methylenetetrahydrofolate dehydrogecytosol | YKR081C	Fig 4A
YKR086W	YKR086W ... PRP16 formation of catalytic U2-type "RNA splicing factor activity, trans"spliceosome complex | YKR087C	Fig 4A
YKR089C	YKR089C … TGL4 (STC1) DNA repair* DNA helicase activity nucleus | Triacylglycerol lipase involved in triacylglycerol mobilization and degradation; found in lipid particles; phosphorylated and activated by Cdc28p; required with Tgl3p for timely bud formationYKR090W	Fig 4A
YKR093W	YKR093W ... PTR2 peptide transport peptide transporter activity plasma membrane | YKR094C	Fig 4A
YKR099W	YKR099W ... BAS1 transcription from RNA polymer RNA polymerase II transcription facnucleus | YKR100C	Fig 4A
YLL003W	YLL003W ... SFI1 G2/M transition of mitotic cel molecular function unknown half bridge of spindle pole body | YLL004W	Fig 4A
YLL006W	YLL006W ... MMM1 mitochondrion organization and molecular function unknown mitochondrial outer membrane | YLL006W-A	Fig 4A
YLL007C	YLL007C ... YLL007C biological process unknown molecular function unknown cytoplasm | YLL008W	Fig 4A
YLL010C	YLL010C ... PSR1 response to stress phosphoprotein phosphatase activityplasma membrane | YLL011W	Fig 4A
YLL012W	YLL012W ... YEH1 sterol metabolism sterol esterase activity integral to membrane* | YLL013C	Fig 4A
YLL014W	YLL014W … EMC6 biological process unknown molecular function unknown | Member of a transmembrane complex required for efficient folding of proteins in the ER; null mutant displays induction of the unfolded protein responseYLL015W	Fig 4A
YLL015W	YLL015W ... BPT1 bilirubin transport* bilirubin transporter activity* vacuolar membrane (sensu Fungi) | YLL018C	Fig 4A
YLL018C-A	YLL018C-A ... COX19 cytochrome c oxidase complex a metal ion transporter activity cytosol* | YLL019C	Fig 4A
YLL023C	YLL023C ... YLL023C biological process unknown molecular function unknown endoplasmic reticulum | YLL024C	Fig 4A
YLL024C	YLL024C ... SSA2 protein folding ATP binding cytoplasm* | YLL025W	Fig 4A
YLL026W	YLL026W iESR cluster HSP104 response to stress* chaperone binding* cytoplasm* | YLL027W	Fig 4A
YLL027W	YLL027W ... ISA1 iron ion transport molecular function unknown mitochondrial matrix | YLL028W	Fig 4A
YLL029W	YLL029W … FRA1 biological process unknown molecular function unknown | Protein involved in negative regulation of transcription of iron regulon; forms an iron independent complex with Fra2p, Grx3p, and Grx4p; cytosolic; mutant fails to repress transcription of iron regulon and is defective in spore formationYLL030C	Fig 4A
YLL031C	YLL031C ... GPI13 GPI anchor biosynthesis "transferase activity, transferring"endoplasmic reticulum | YLL032C	Fig 4A
YLL032C	YLL032C ... YLL032C biological process unknown molecular function unknown cytoplasm | YLL033W	Fig 4A
YLL035W	YLL035W PAC cluster GRC3 rRNA processing molecular function unknown cellular component unknown | YLL036C	Fig 4A
YLL036C	YLL036C PAC cluster PRP19 nuclear mRNA splicing, via spl "RNA splicing factor activity, trans"cytoplasm* | YLL037W	Fig 4A
YLL042C	YLL042C ... ATG10 protein-vacuolar targeting* ubiquitin-like conjugating enzyme acytoplasm | YLL043W	Fig 4A
YLL048C	YLL048C ... YBT1 bile acid transport "ATPase activity, coupled to transme"vacuole (sensu Fungi) | YLL049W	Fig 4A
YLL050C	YLL050C ... COF1 actin filament organization* protein binding actin cortical patch | YLL051C	Fig 4A
YLL051C	YLL051C ... FRE6 biological process unknown ferric-chelate reductase activity vacuole (sensu Fungi) | YLL052C	Fig 4A
YLL052C	YLL052C ... AQY2 water transport water channel activity plasma membrane* | YLL053C	Fig 4A
YLL053C	YLL053C ... YLL053C biological process unknown molecular function unknown cellular component unknown | YLL054C	Fig 4A
YLL054C	YLL054C ... YLL054C biological process unknown transcriptional activator activity plasma membrane | YLL055W	Fig 4A
YLL055W	YLL055W … YCT1 biological process unknown ion transporter activity | High-affinity cysteine-specific transporter with similarity to the Dal5p family of transporters; green fluorescent protein (GFP)-fusion protein localizes to the endoplasmic reticulum; YCT1 is not an essential geneYLL056C	Fig 4A
YLL056C	YLL056C ... YLL056C biological process unknown molecular function unknown cellular component unknown | YLL057C	Fig 4A
YLL060C	YLL060C ... GTT2 glutathione metabolism glutathione transferase activity mitochondrion | YLL061W	Fig 4A
YLL062C	YLL062C ... MHT1 sulfur amino acid metabolism homocysteine S-methyltransferase accytoplasm | YLL063C	Fig 4A
YLL063C	YLL063C ... AYT1 secondary metabolism trichothecene 3-O-acetyltransferasecellular component unknown | YLL064C	Fig 4A
YLR001C	YLR001C iESR cluster YLR001C biological process unknown molecular function unknown mitochondrion* | YLR002C	Fig 4A
YLR003C	YLR003C … PAC cluster CMS1 regulation of DNA replication molecular function unknown | Subunit of U3-containing 90S preribosome processome complex involved in production of 18S rRNA and assembly of small ribosomal subunit; overexpression rescues supressor mutant of mcm10; null mutant is viableYLR004C	Fig 4A
YLR004C	YLR004C … THI73 transport transporter activity | Putative plasma membrane permease proposed to be involved in carboxylic acid uptake and repressed by thiamine; substrate of Dbf2p/Mob1p kinase; transcription is altered if mitochondrial dysfunction occursYLR005W	Fig 4A
YLR007W	YLR007W ... NSE1 DNA repair* molecular function unknown nucleus* | YLR008C	Fig 4A
YLR009W	YLR009W PAC cluster RLP24 ribosomal large subunit biogen molecular function unknown nucleolus | YLR010C	Fig 4A
YLR011W	YLR011W ... LOT6 biological process unknown FMN reductase activity cytoplasm* | YLR012C	Fig 4A
YLR014C	YLR014C ... PPR1 regulation of transcription, D transcription factor activity nucleus | YLR015W	Fig 4A
YLR018C	YLR018C ... POM34 nucleocytoplasmic transport molecular function unknown nuclear pore | YLR019W	Fig 4A
YLR019W	YLR019W ... PSR2 response to stress phosphoprotein phosphatase activityplasma membrane | YLR020C	Fig 4A
YLR022C	YLR022C ... SDO1 35S primary transcript process molecular function unknown cytoplasm* | YLR023C	Fig 4A
YLR023C	YLR023C ... IZH3 lipid metabolism* metal ion binding endoplasmic reticulum* | YLR024C	Fig 4A
YLR024C	YLR024C ... UBR2 protein monoubiquitination* ubiquitin-protein ligase activity cytoplasm | YLR025W	Fig 4A
YLR025W	YLR025W ... SNF7 late endosome to vacuole trans molecular function unknown cytoplasm* | YLR026C	Fig 4A
YLR028C	YLR028C ... ADE16 aerobic respiration* IMP cyclohydrolase activity* cytosol | YLR029C	Fig 4A
YLR033W	YLR033W ... RSC58 chromatin remodeling molecular function unknown RSC complex | YLR034C	Fig 4A
YLR034C	YLR034C ... SMF3 intracellular sequestering of iron ion transporter activity vacuolar membrane (sensu Fungi) | YLR035C	Fig 4A
YLR035C	YLR035C ... MLH2 DNA repair molecular function unknown nucleus | YLR036C	Fig 4A
YLR036C	YLR036C ... YLR036C biological process unknown molecular function unknown cellular component unknown | YLR037C	Fig 4A
YLR039C	YLR039C ... RIC1 intracellular protein transpor guanyl-nucleotide exchange factor anucleus* | YLR040C	Fig 4A
YLR043C	YLR043C ... TRX1 response to oxidative stress* thiol-disulfide exchange intermediacytosol* | YLR044C	Fig 4A
YLR046C	YLR046C ... YLR046C biological process unknown molecular function unknown integral to membrane | YLR047C	Fig 4A
YLR047C	YLR047C … FRE8 biological process unknown "oxidoreductase activity, oxid | Protein with sequence similarity to iron/copper reductases, involved in iron homeostasis; deletion mutant has iron deficiency/accumulation growth defects; expression increased in the absence of copper-responsive transcription factor Mac1pYLR048W	Fig 4A
YLR048W	YLR048W RP cluster RPS0B protein biosynthesis* structural constituent of ribosome cytosolic small ribosomal subunit ( | YLR049C	Fig 4A
YLR050C	YLR050C ... YLR050C biological process unknown molecular function unknown endoplasmic reticulum | YLR051C	Fig 4A
YLR056W	YLR056W ... ERG3 ergosterol biosynthesis C-5 sterol desaturase activity endoplasmic reticulum | YLR057W	Fig 4A
YLR058C	YLR058C ... SHM2 one-carbon compound metabolism glycine hydroxymethyltransferase accytoplasm | YLR059C	Fig 4A
YLR060W	YLR060W PAC cluster FRS1 phenylalanyl-tRNA aminoacylati phenylalanine-tRNA ligase activity cytoplasm* | YLR061W	Fig 4A
YLR063W	YLR063W PAC cluster YLR063W biological process unknown molecular function unknown cytoplasm | YLR064W	Fig 4A
YLR064W	YLR064W ... YLR064W biological process unknown molecular function unknown endoplasmic reticulum | YLR065C	Fig 4A
YLR065C	YLR065C PAC cluster YLR065C biological process unknown molecular function unknown cellular component unknown | YLR066W	Fig 4A
YLR066W	YLR066W ... SPC3 signal peptide processing signal peptidase activity signal peptidase complex | YLR067C	Fig 4A
YLR067C	YLR067C ... PET309 protein biosynthesis* translation regulator activity integral to membrane* | YLR068W	Fig 4A
YLR071C	YLR071C ... RGR1 transcription from RNA polymer RNA polymerase II transcription medmediator complex | YLR072W	Fig 4A
YLR078C	YLR078C ... BOS1 ER to Golgi transport v-SNARE activity endoplasmic reticulum membrane | YLR079W	Fig 4A
YLR083C	YLR083C PAC cluster EMP70 transport transporter activity membrane fraction* | YLR084C	Fig 4A
YLR084C	YLR084C ... RAX2 bud site selection molecular function unknown mitochondrion* | YLR085C	Fig 4A
YLR085C	YLR085C ... ARP6 protein-vacuolar targeting* molecular function unknown cytoplasm* | YLR086W	Fig 4A
YLR087C	YLR087C ... CSF1 fermentation molecular function unknown mitochondrion | YLR088W	Fig 4A
YLR088W	YLR088W ... GAA1 attachment of GPI anchor to pr GPI-anchor transamidase activity GPI-anchor transamidase complex | YLR089C	Fig 4A
YLR089C	YLR089C ... ALT1 biological process unknown transaminase activity mitochondrion | YLR090W	Fig 4A
YLR092W	YLR092W ... SUL2 sulfate transport sulfate transporter activity plasma membrane | YLR093C	Fig 4A
YLR093C	YLR093C ... NYV1 vesicle fusion v-SNARE activity vacuolar membrane | YLR094C	Fig 4A
YLR096W	YLR096W ... KIN2 exocytosis protein kinase activity plasma membrane* | YLR097C	Fig 4A
YLR097C	YLR097C ... HRT3 ubiquitin-dependent protein ca ubiquitin-protein ligase activity nuclear ubiquitin ligase complex | YLR098C	Fig 4A
YLR098C	YLR098C ... CHA4 regulation of transcription, D transcription factor activity nucleus | YLR099C	Fig 4A
YLR099C	YLR099C ... ICT1 biological process unknown molecular function unknown cellular component unknown | YLR099W-A	Fig 4A
YLR100W	YLR100W ... ERG27 ergosterol biosynthesis 3-keto sterol reductase activity endoplasmic reticulum* | YLR101C	Fig 4A
YLR106C	YLR106C ... MDN1 rRNA processing* ATPase activity nucleus* | YLR107W	Fig 4A
YLR107W	YLR107W ... REX3 RNA processing 3'-5' exonuclease activity cytoplasm* | YLR108C	Fig 4A
YLR109W	YLR109W ... AHP1 regulation of cell redox homeo thioredoxin peroxidase activity cytoplasm | YLR110C	Fig 4A
YLR118C	YLR118C ... YLR118C biological process unknown "hydrolase activity, acting on ester"cytoplasm* | YLR119W	Fig 4A
YLR120C	YLR120C ... YPS1 protein processing aspartic-type endopeptidase activitcell wall (sensu Fungi) | YLR121C	Fig 4A
YLR127C	YLR127C ... APC2 mitotic sister chromatid segre protein binding* anaphase-promoting complex | YLR128W	Fig 4A
YLR128W	YLR128W ... DCN1 biological process unknown molecular function unknown cellular component unknown | YLR129W	Fig 4A
YLR129W	YLR129W PAC cluster DIP2 processing of 20S pre-rRNA snoRNA binding small nucleolar ribonucleoprotein c | YLR130C	Fig 4A
YLR130C	YLR130C ... ZRT2 low-affinity zinc ion transpor low-affinity zinc ion transporter aplasma membrane | YLR131C	Fig 4A
YLR133W	YLR133W ... CKI1 phosphatidylcholine biosynthes choline kinase activity cytosol | YLR134W	Fig 4A
YLR137W	YLR137W ... YLR137W biological process unknown molecular function unknown cellular component unknown | YLR138W	Fig 4A
YLR138W	YLR138W ... NHA1 monovalent inorganic cation ho cation:cation antiporter activity plasma membrane | YLR139C	Fig 4A
YLR144C	YLR144C ... ACF2 actin cytoskeleton organizatio "glucan 1,3-beta-glucosidase activit"intracellular | YLR145W	Fig 4A
YLR146C	YLR146C PAC cluster SPE4 pantothenate biosynthesis* spermine synthase activity cytoplasm | YLR147C	Fig 4A
YLR153C	YLR153C ... ACS2 acetyl-CoA biosynthesis acetate-CoA ligase activity cytosol | YLR154C	Fig 4A
YLR154C	YLR154C ... RNH203 DNA replication ribonuclease H activity cytoplasm* | YLR154C-G	Fig 4A
YLR165C	YLR165C ... PUS5 rRNA modification* pseudouridylate synthase activity mitochondrion | YLR166C	Fig 4A
YLR166C	YLR166C ... SEC10 establishment of cell polarity protein binding exocyst | YLR167W	Fig 4A
YLR172C	YLR172C PAC cluster DPH5 peptidyl-diphthamide biosynthe diphthine synthase activity cytoplasm | YLR173W	Fig 4A
YLR178C	YLR178C iESR cluster TFS1 regulation of proteolysis and lipid binding* soluble fraction | YLR179C	Fig 4A
YLR180W	YLR180W ... SAM1 methionine metabolism methionine adenosyltransferase acticytoplasm | YLR181C	Fig 4A
YLR188W	YLR188W ... MDL1 oligopeptide transport ATPase activity* mitochondrial inner membrane | YLR189C	Fig 4A
YLR190W	YLR190W ... MMR1 mitochondrion inheritance molecular function unknown mitochondrion* | YLR191W	Fig 4A
YLR194C	YLR194C ... YLR194C biological process unknown molecular function unknown cell wall (sensu Fungi) | YLR195C	Fig 4A
YLR196W	YLR196W PAC cluster PWP1 rRNA processing molecular function unknown cytoplasm* | YLR197W	Fig 4A
YLR199C	YLR199C … PBA1 biological process unknown molecular function unknown | Protein involved in 20S proteasome assembly; forms a heterodimer with Add66p that binds to proteasome precursors; similar to human PAC1 constituent of the PAC1-PAC2 complex involved in proteasome assemblyYLR200W	Fig 4A
YLR207W	YLR207W ... HRD3 ER-associated protein cataboli ubiquitin-protein ligase activity endoplasmic reticulum | YLR208W	Fig 4A
YLR209C	YLR209C ... PNP1 purine nucleoside catabolism purine-nucleoside phosphorylase actcellular component unknown | YLR210W	Fig 4A
YLR210W	YLR210W ... CLB4 G2/M transition of mitotic cel cyclin-dependent protein kinase regcytoplasm* | YLR211C	Fig 4A
YLR214W	YLR214W ... FRE1 iron ion transport* ferric-chelate reductase activity plasma membrane | YLR215C	Fig 4A
YLR215C	YLR215C ... CDC123 regulation of mitotic cell cyc molecular function unknown cytoplasm | YLR216C	Fig 4A
YLR220W	YLR220W ... CCC1 iron ion homeostasis* molecular function unknown Golgi apparatus* | YLR221C	Fig 4A
YLR222C	YLR222C PAC cluster UTP13 processing of 20S pre-rRNA snoRNA binding small nucleolar ribonucleoprotein c | YLR223C	Fig 4A
YLR225C	YLR225C ... YLR225C biological process unknown molecular function unknown cytoplasm | YLR226W	Fig 4A
YLR227C	YLR227C ... ADY4 sporulation structural molecule activity spindle pole body | YLR228C	Fig 4A
YLR228C	YLR228C ... ECM22 sterol biosynthesis RNA polymerase II transcription facnucleus | YLR229C	Fig 4A
YLR229C	YLR229C ... CDC42 establishment of cell polarity GTPase activity* plasma membrane* | YLR230W	Fig 4A
YLR230W	YLR230W ... | YLR231C	Fig 4A
YLR231C	YLR231C ... BNA5 NAD biosynthesis kynureninase activity cytoplasm* | YLR232W	Fig 4A
YLR233C	YLR233C ... EST1 telomerase-dependent telomere RNA binding* nucleus* | YLR234W	Fig 4A
YLR237W	YLR237W ... THI7 thiamin transport thiamin transporter activity plasma membrane | YLR238W	Fig 4A
YLR238W	YLR238W ... FAR10 cell cycle arrest in response molecular function unknown endoplasmic reticulum | YLR239C	Fig 4A
YLR240W	YLR240W ... VPS34 protein amino acid phosphoryla protein kinase activity* membrane fraction | YLR241W	Fig 4A
YLR241W	YLR241W ... YLR241W biological process unknown molecular function unknown cellular component unknown | YLR242C	Fig 4A
YLR242C	YLR242C ... ARV1 sphingolipid metabolism* molecular function unknown endoplasmic reticulum* | YLR243W	Fig 4A
YLR244C	YLR244C ... MAP1 proteolysis and peptidolysis methionyl aminopeptidase activity cytosolic ribosome (sensu Eukaryota | YLR245C	Fig 4A
YLR245C	YLR245C ... CDD1 cytidine catabolism* cytidine deaminase activity cytoplasm* | YLR246W	Fig 4A
YLR246W	YLR246W ... ERF2 protein-membrane targeting* protein-cysteine S-palmitoleyltransintegral to endoplasmic reticulum m | YLR247C	Fig 4A
YLR247C	YLR247C … IRC20 biological process unknown helicase activity | Putative helicase; localizes to the mitochondrion and the nucleus; YLR247C is not an essential gene; null mutant displays increased levels of spontaneous Rad52p fociYLR248W	Fig 4A
YLR248W	YLR248W ... RCK2 protein amino acid phosphoryla protein serine/threonine kinase actcytoplasm | YLR249W	Fig 4A
YLR249W	YLR249W PAC cluster YEF3 translational elongation translation elongation factor activribosome | YLR250W	Fig 4A
YLR258W	YLR258W iESR cluster GSY2 glycogen metabolism glycogen (starch) synthase activitycytoplasm | YLR259C	Fig 4A
YLR260W	YLR260W ... LCB5 response to heat* D-erythro-sphingosine kinase activimembrane fraction* | YLR261C	Fig 4A
YLR265C	YLR265C ... NEJ1 DNA repair* molecular function unknown nucleus | YLR266C	Fig 4A
YLR271W	YLR271W ... YLR271W biological process unknown molecular function unknown cytoplasm* | YLR272C	Fig 4A
YLR272C	YLR272C ... YCS4 mitotic chromosome condensatio molecular function unknown nuclear condensin complex | YLR273C	Fig 4A
YLR273C	YLR273C ... PIG1 regulation of glycogen biosynt protein phosphatase regulator activprotein phosphatase type 1 complex | YLR274W	Fig 4A
YLR274W	YLR274W … MCM5 DNA replication initiation* chromatin binding* cytoplasm* | Component of the hexameric MCM complex, which is important for priming origins of DNA replication in G1 and becomes an active ATP-dependent helicase that promotes DNA melting and elongation when activated by Cdc7p-Dbf4p in S-phaseYLR275W	Fig 4A
YLR286C	YLR286C ... CTS1 cytokinesis, completion of sep endochitinase activity endoplasmic reticulum* | YLR287C	Fig 4A
YLR287C	YLR287C ... YLR287C biological process unknown molecular function unknown cytoplasm | YLR287C-A	Fig 4A
YLR289W	YLR289W ... GUF1 biological process unknown GTPase activity mitochondrion | YLR290C	Fig 4A
YLR290C	YLR290C iESR cluster YLR290C biological process unknown molecular function unknown mitochondrion | YLR291C	Fig 4A
YLR293C	YLR293C PAC cluster GSP1 rRNA processing* GTPase activity cytoplasm* | YLR295C	Fig 4A
YLR298C	YLR298C ... YHC1 nuclear mRNA splicing, via spl mRNA binding commitment complex* | YLR299W	Fig 4A
YLR299W	YLR299W iESR cluster ECM38 glutathione catabolism protein-glutamine gamma-glutamyltraintracellular | YLR300W	Fig 4A
YLR303W	YLR303W ... MET17 methionine metabolism* cysteine synthase activity* cytoplasm | YLR304C	Fig 4A
YLR305C	YLR305C ... STT4 actin cytoskeleton organizatio 1-phosphatidylinositol 4-kinase actmitochondrion* | YLR306W	Fig 4A
YLR310C	YLR310C ... CDC25 regulation of cell cycle* Ras guanyl-nucleotide exchange factcytoplasm* | YLR311C	Fig 4A
YLR312W-A	YLR312W-A ... MRPL15 protein biosynthesis structural constituent of ribosome mitochondrial large ribosomal subun | YLR313C	Fig 4A
YLR313C	YLR313C ... SPH1 actin filament organization* cytoskeletal regulatory protein binbud neck* | YLR314C	Fig 4A
YLR318W	YLR318W ... EST2 telomerase-dependent telomere telomerase activity* nucleus* | YLR319C	Fig 4A
YLR320W	YLR320W ... MMS22 double-strand break repair molecular function unknown nucleus | YLR321C	Fig 4A
YLR324W	YLR324W ... PEX30 peroxisome organization and bi molecular function unknown peroxisome* | YLR325C	Fig 4A
YLR329W	YLR329W ... REC102 meiotic recombination* protein binding nucleus | YLR330W	Fig 4A
YLR332W	YLR332W ... MID2 cell wall organization and bio transmembrane receptor activity integral to plasma membrane | YLR333C	Fig 4A
YLR333C	YLR333C PAC cluster RPS25B protein biosynthesis structural constituent of ribosome cytosolic small ribosomal subunit ( | YLR334C	Fig 4A
YLR337C	YLR337C ... VRP1 endocytosis* actin binding actin cortical patch | YLR338W	Fig 4A
YLR342W	YLR342W ... FKS1 cell wall organization and bio "1,3-beta-glucan synthase activity"actin cortical patch* | YLR342W-A	Fig 4A
YLR342W-A	YLR342W-A ... YLR342W-A biological process unknown molecular function unknown cellular component unknown | YLR343W	Fig 4A
YLR343W	YLR343W ... GAS2 biological process unknown "1,3-beta-glucanosyltransferase acti"cytoplasm | YLR344W	Fig 4A
YLR347C	YLR347C ... KAP95 protein-nucleus import protein carrier activity cytoplasm* | YLR348C	Fig 4A
YLR348C	YLR348C ... DIC1 dicarboxylic acid transport dicarboxylic acid transporter activmitochondrial membrane | YLR349W	Fig 4A
YLR350W	YLR350W ... ORM2 response to unfolded protein molecular function unknown endoplasmic reticulum | YLR351C	Fig 4A
YLR352W	YLR352W ... YLR352W biological process unknown molecular function unknown cellular component unknown | YLR353W	Fig 4A
YLR353W	YLR353W ... BUD8 pseudohyphal growth* molecular function unknown bud tip* | YLR354C	Fig 4A
YLR354C	YLR354C ... TAL1 pentose-phosphate shunt transaldolase activity cytoplasm | YLR355C	Fig 4A
YLR355C	YLR355C ... ILV5 mitochondrial genome maintenan ketol-acid reductoisomerase activitmitochondrion* | YLR356W	Fig 4A
YLR356W	YLR356W iESR cluster YLR356W biological process unknown molecular function unknown mitochondrion | YLR357W	Fig 4A
YLR361C	YLR361C ... DCR2 biological process unknown molecular function unknown cellular component unknown | YLR361C-A	Fig 4A
YLR361C-A	YLR361C-A ... YLR361C-A biological process unknown molecular function unknown cellular component unknown | YLR362W	Fig 4A
YLR367W	YLR367W RP cluster RPS22B protein biosynthesis structural constituent of ribosome cytosolic small ribosomal subunit ( | YLR368W	Fig 4A
YLR368W	YLR368W ... MDM30 mitochondrion organization and molecular function unknown mitochondrion | YLR369W	Fig 4A
YLR372W	YLR372W PAC cluster SUR4 sphingolipid biosynthesis* fatty acid elongase activity endoplasmic reticulum* | YLR373C	Fig 4A
YLR376C	YLR376C ... PSY3 error-free DNA repair molecular function unknown cytoplasm* | YLR377C	Fig 4A
YLR381W	YLR381W ... CTF3 chromosome segregation protein binding condensed nuclear chromosome kineto | YLR382C	Fig 4A
YLR384C	YLR384C ... IKI3 regulation of transcription fr RNA polymerase II transcription elotranscription elongation factor com | YLR385C	Fig 4A
YLR386W	YLR386W ... VAC14 vacuole inheritance* enzyme activator activity vacuolar membrane (sensu Fungi)* | YLR387C	Fig 4A
YLR388W	YLR388W RP cluster RPS29A protein biosynthesis structural constituent of ribosome cytosolic small ribosomal subunit ( | YLR389C	Fig 4A
YLR390W-A	YLR390W-A ... CCW14 cell wall organization and bio structural constituent of cell wallmitochondrion* | YLR392C	Fig 4A
YLR394W	YLR394W ... CST9 synaptonemal complex formation DNA binding nuclear chromosome | YLR395C	Fig 4A
YLR396C	YLR396C ... VPS33 late endosome to vacuole trans ATP binding cytosol* | YLR397C	Fig 4A
YLR397C	YLR397C PAC cluster AFG2 response to drug ATPase activity intracellular | YLR398C	Fig 4A
YLR398C	YLR398C ... SKI2 mRNA catabolism* RNA helicase activity* cytoplasm* | YLR399C	Fig 4A
YLR403W	YLR403W ... SFP1 transcription from RNA polymer transcription factor activity cytoplasm* | YLR404W	Fig 4A
YLR404W	YLR404W … FLD1 biological process unknown molecular function unknown | Seipin protein involved in lipid droplet morphology, number, and size; proposed to be involved in lipid metabolism; related to the human BSCL2 which is associated with lipodystrophyYLR405W	Fig 4A
YLR405W	YLR405W PAC cluster DUS4 tRNA modification tRNA dihydrouridine synthase activicellular component unknown | YLR406C	Fig 4A
YLR413W	YLR413W PAC cluster YLR413W biological process unknown molecular function unknown cellular component unknown | YLR414C	Fig 4A
YLR414C	YLR414C ... YLR414C biological process unknown molecular function unknown cytoplasm* | YLR415C	Fig 4A
YLR417W	YLR417W ... VPS36 protein-vacuolar targeting* regulator of G-protein signaling acESCRT II complex | YLR418C	Fig 4A
YLR419W	YLR419W ... YLR419W biological process unknown helicase activity cytoplasm* | YLR420W	Fig 4A
YLR422W	YLR422W ... YLR422W biological process unknown molecular function unknown cytoplasm | YLR423C	Fig 4A
YLR425W	YLR425W ... TUS1 cell wall organization and bio Rho guanyl-nucleotide exchange factcellular component unknown | YLR426W	Fig 4A
YLR427W	YLR427W ... MAG2 DNA dealkylation alkylbase DNA N-glycosylase activitcytoplasm | YLR428C	Fig 4A
YLR430W	YLR430W ... SEN1 35S primary transcript process ATP-dependent RNA helicase activitynucleus | YLR431C	Fig 4A
YLR431C	YLR431C ... ATG23 protein-vacuolar targeting* molecular function unknown extrinsic to membrane | YLR432W	Fig 4A
YLR432W	YLR432W PAC cluster IMD3 GTP biosynthesis IMP dehydrogenase activity cytoplasm | YLR433C	Fig 4A
YLR433C	YLR433C PAC cluster CNA1 cell wall organization and bio calcium-dependent protein serine/thcytoplasm* | YLR434C	Fig 4A
YLR437C	YLR437C … DIF1 biological process unknown molecular function unknown | Protein that regulates the nuclear localization of ribonucleotide reductase Rnr2p and Rnr4p subunits; phosphorylated by Dun1p in response to DNA damage and degraded; N-terminal half has similarity to S. pombe Spd1 proteinYLR438C-A	Fig 4A
YLR443W	YLR443W ... ECM7 cell wall organization and bio molecular function unknown integral to membrane | YLR444C	Fig 4A
YLR446W	YLR446W ... YLR446W biological process unknown molecular function unknown cellular component unknown | YLR447C	Fig 4A
YLR450W	YLR450W ... HMG2 ergosterol biosynthesis hydroxymethylglutaryl-CoA reductaseendoplasmic reticulum membrane* | YLR451W	Fig 4A
YLR451W	YLR451W ... LEU3 regulation of transcription fr specific RNA polymerase II transcrinucleus | YLR452C	Fig 4A
YLR452C	YLR452C ... SST2 signal transduction* GTPase activator activity plasma membrane | YLR453C	Fig 4A
YLR453C	YLR453C ... RIF2 telomerase-dependent telomere telomeric DNA binding nuclear telomere cap complex | YLR454W	Fig 4A
YLR456W	YLR456W ... YLR456W biological process unknown molecular function unknown cellular component unknown | YLR457C	Fig 4A
YLR459W	YLR459W ... GAB1 attachment of GPI anchor to pr GPI-anchor transamidase activity GPI-anchor transamidase complex | YLR460C	Fig 4A
YPL002C	YPL002C ... SNF8 protein-vacuolar targeting* molecular function unknown ESCRT II complex | YPL003W	Fig 4A
YPL004C	YPL004C iESR cluster LSP1 response to heat protein kinase inhibitor activity cytoplasm* | YPL005W	Fig 4A
YPL005W	YPL005W ... AEP3 mRNA metabolism molecular function unknown cytoplasm* | YPL006W	Fig 4A
YPL008W	YPL008W ... CHL1 chromosome segregation* DNA helicase activity nucleus | YPL009C	Fig 4A
YPL010W	YPL010W ... RET3 retrograde transport, Golgi to protein binding COPI vesicle coat | YPL011C	Fig 4A
YPL011C	YPL011C ... TAF3 transcription initiation from general RNA polymerase II transcriptranscription factor TFIID complex | YPL012W	Fig 4A
YPL015C	YPL015C ... HST2 chromatin silencing at telomer NAD-dependent histone deacetylase acytoplasm | YPL016W	Fig 4A
YPL020C	YPL020C ... ULP1 G2/M transition of mitotic cel cysteine-type peptidase activity* nuclear pore* | YPL021W	Fig 4A
YPL022W	YPL022W ... RAD1 removal of nonhomologous ends* single-stranded DNA specific endodenucleotide excision repair factor 1 | YPL023C	Fig 4A
YPL024W	YPL024W ... RMI1 response to DNA damage stimulu molecular function unknown cytoplasm* | YPL025C	Fig 4A
YPL025C	YPL025C ... | YPL026C	Fig 4A
YPL028W	YPL028W ... ERG10 ergosterol biosynthesis acetyl-CoA C-acetyltransferase acticytosol | YPL029W	Fig 4A
YPL030W	YPL030W … TRM44 biological process unknown molecular function unknown | tRNA(Ser) Um(44) 2'-O-methyltransferase; involved in maintaining levels of the tRNA-Ser species tS(CGA) and tS(UGA); conserved among metazoans and fungi but there does not appear to be a homolog in plants; TRM44 is a non-essential geneYPL031C	Fig 4A
YPL034W	YPL034W ... YPL034W biological process unknown molecular function unknown cellular component unknown | YPL035C	Fig 4A
YPL036W	YPL036W ... PMA2 regulation of pH* "hydrogen-exporting ATPase activity,"plasma membrane | YPL037C	Fig 4A
YPL042C	YPL042C ... SSN3 protein amino acid phosphoryla general RNA polymerase II transcriptranscription factor complex | YPL043W	Fig 4A
YPL045W	YPL045W ... VPS16 protein-vacuolar targeting* molecular function unknown vacuolar membrane (sensu Fungi)* | YPL046C	Fig 4A
YPL047W	YPL047W ... SGF11 regulation of transcription fr molecular function unknown nucleus* | YPL048W	Fig 4A
YPL048W	YPL048W ... CAM1 regulation of translational el translation elongation factor activcytosolic ribosome (sensu Eukaryota | YPL049C	Fig 4A
YPL050C	YPL050C ... MNN9 N-linked glycosylation mannosyltransferase activity membrane* | YPL051W	Fig 4A
YPL052W	YPL052W ... OAZ1 protein catabolism enzyme inhibitor activity cell | YPL053C	Fig 4A
YPL057C	YPL057C ... SUR1 sphingolipid biosynthesis* mannosyltransferase activity* intracellular | YPL058C	Fig 4A
YPL059W	YPL059W ... GRX5 response to osmotic stress* thiol-disulfide exchange intermediamitochondrial matrix | YPL060W	Fig 4A
YPL060W	YPL060W ... LPE10 mitochondrial magnesium ion tr magnesium ion transporter activity mitochondrial inner membrane | YPL061W	Fig 4A
YPL066W	YPL066W ... YPL066W biological process unknown molecular function unknown cytoplasm* | YPL067C	Fig 4A
YPL070W	YPL070W ... MUK1 regulation of transcription molecular function unknown cytoplasm | YPL071C	Fig 4A
YPL071C	YPL071C ... YPL071C biological process unknown molecular function unknown cytoplasm* | YPL072W	Fig 4A
YPL072W	YPL072W ... UBP16 protein deubiquitination ubiquitin-specific protease activitcytoplasm | YPL073C	Fig 4A
YPL074W	YPL074W ... YTA6 biological process unknown ATPase activity cell cortex | YPL075W	Fig 4A
YPL083C	YPL083C ... SEN54 tRNA splicing tRNA-intron endonuclease activity mitochondrial outer membrane* | YPL084W	Fig 4A
YPL086C	YPL086C PAC cluster ELP3 regulation of transcription fr RNA polymerase II transcription elotranscription elongation factor com | YPL087W	Fig 4A
YPL087W	YPL087W iESR cluster YDC1 response to heat* ceramidase activity endoplasmic reticulum | YPL088W	Fig 4A
YPL088W	YPL088W ... YPL088W aldehyde metabolism aryl-alcohol dehydrogenase activitycellular component unknown | YPL089C	Fig 4A
YPL091W	YPL091W ... GLR1 response to oxidative stress glutathione-disulfide reductase actcytoplasm* | YPL092W	Fig 4A
YPL095C	YPL095C … EEB1 biological process unknown molecular function unknown | Acyl-coenzymeA:ethanol O-acyltransferase responsible for the major part of medium-chain fatty acid ethyl ester biosynthesis during fermentation; possesses short-chain esterase activity; may be involved in lipid metabolism and detoxificationYPL096C-A	Fig 4A
YPL096C-A	YPL096C-A ... ERI1 small GTPase mediated signal t GTPase inhibitor activity glycosylphosphatidylinositol-N-acet | YPL096W	Fig 4A
YPL100W	YPL100W ... ATG21 autophagy* phosphoinositide binding cytosol* | YPL101W	Fig 4A
YPL101W	YPL101W ... ELP4 regulation of transcription fr RNA polymerase II transcription elocytoplasm* | YPL102C	Fig 4A
YPL103C	YPL103C ... FMP30 biological process unknown molecular function unknown mitochondrion | YPL104W	Fig 4A
YPL106C	YPL106C ... SSE1 protein folding unfolded protein binding cytoplasm | YPL107W	Fig 4A
YPL109C	YPL109C ... YPL109C biological process unknown molecular function unknown mitochondrion | YPL110C	Fig 4A
YPL110C	YPL110C … GDE1 biological process unknown molecular function unknown | Glycerophosphocholine (GroPCho) phosphodiesterase; hydrolyzes GroPCho to choline and glycerolphosphate, for use as a phosphate source and as a precursor for phosphocholine synthesis; may interact with ribosomesYPL111W	Fig 4A
YPL111W	YPL111W ... CAR1 arginine catabolism to ornithi arginase activity cytosol | YPL112C	Fig 4A
YPL113C	YPL113C ... YPL113C metabolism oxidoreductase activity cellular component unknown | YPL114W	Fig 4A
YPL116W	YPL116W ... HOS3 histone deacetylation histone deacetylase activity cytoplasm* | YPL117C	Fig 4A
YPL117C	YPL117C ... IDI1 ergosterol biosynthesis isopentenyl-diphosphate delta-isomecytosol | YPL118W	Fig 4A
YPL119C	YPL119C ... DBP1 translational initiation* RNA helicase activity cytoplasm | YPL119C-A	Fig 4A
YPL120W	YPL120W ... VPS30 protein-vacuolar targeting* molecular function unknown membrane fraction | YPL121C	Fig 4A
YPL122C	YPL122C ... TFB2 transcription initiation from general RNA polymerase II transcriptranscription factor TFIIH complex* | YPL123C	Fig 4A
YPL125W	YPL125W ... KAP120 protein-nucleus import structural constituent of nuclear pcytoplasm* | YPL126W	Fig 4A
YPL129W	YPL129W ... TAF14 chromatin remodeling* general RNA polymerase II transcripmediator complex* | YPL130W	Fig 4A
YPL133C	YPL133C ... RDS2 response to xenobiotic stimulu transcription factor activity cytoplasm* | YPL134C	Fig 4A
YPL134C	YPL134C ... ODC1 mitochondrial transport intracellular transporter activity*mitochondrion* | YPL135W	Fig 4A
YPL135W	YPL135W ... ISU1 iron ion homeostasis* protein binding mitochondrion* | YPL136W	Fig 4A
YPL137C	YPL137C … GIP3 biological process unknown molecular function unknown | Glc7-interacting protein whose overexpression relocalizes Glc7p from the nucleus and prevents chromosome segregation; may interact with ribosomes, based on co-purification experimentsYPL138C	Fig 4A
YPL138C	YPL138C ... SPP1 chromatin silencing at telomer histone lysine N-methyltransferase COMPASS complex | YPL139C	Fig 4A
YPL140C	YPL140C ... MKK2 protein amino acid phosphoryla MAP kinase kinase activity intracellular | YPL141C	Fig 4A
YPL141C	YPL141C ... YPL141C biological process unknown protein kinase activity cytoplasm | YPL142C	Fig 4A
YPL147W	YPL147W ... PXA1 fatty acid transport "ATPase activity, coupled to transme"integral to peroxisomal membrane | YPL148C	Fig 4A
YPL148C	YPL148C ... PPT2 protein-cofactor linkage phosphopantetheinyltransferase actimitochondrion | YPL149W	Fig 4A
YPL149W	YPL149W ... ATG5 protein-vacuolar targeting* molecular function unknown cytosol* | YPL150W	Fig 4A
YPL150W	YPL150W ... YPL150W biological process unknown protein kinase activity cellular component unknown | YPL151C	Fig 4A
YPL151C	YPL151C ... PRP46 nuclear mRNA splicing, via spl molecular function unknown spliceosome complex | YPL152W	Fig 4A
YPL152W	YPL152W iESR cluster RRD2 response to osmotic stress* protein phosphatase type 2A regulatcytosol* | YPL152W-A	Fig 4A
YPL156C	YPL156C ... PRM4 conjugation with cellular fusi molecular function unknown integral to membrane | YPL157W	Fig 4A
YPL157W	YPL157W ... TGS1 ribosome biogenesis* RNA methyltransferase activity nucleolus | YPL158C	Fig 4A
YPL159C	YPL159C ... PET20 biological process unknown molecular function unknown cellular component unknown | YPL160W	Fig 4A
YPL160W	YPL160W PAC cluster CDC60 leucyl-tRNA aminoacylation leucine-tRNA ligase activity cytoplasm | YPL161C	Fig 4A
YPL161C	YPL161C ... BEM4 establishment of cell polarity molecular function unknown cytoplasm* | YPL162C	Fig 4A
YPL162C	YPL162C ... YPL162C biological process unknown molecular function unknown vacuolar membrane (sensu Fungi) | YPL163C	Fig 4A
YPL164C	YPL164C ... MLH3 meiotic recombination* molecular function unknown nucleus | YPL165C	Fig 4A
YPL167C	YPL167C ... REV3 DNA repair* zeta DNA polymerase activity zeta DNA polymerase complex | YPL168W	Fig 4A
YPL168W	YPL168W ... YPL168W biological process unknown molecular function unknown mitochondrion | YPL169C	Fig 4A
YPL174C	YPL174C ... NIP100 establishment of mitotic spind protein binding* spindle pole body* | YPL175W	Fig 4A
YPL175W	YPL175W ... SPT14 GPI anchor biosynthesis "transferase activity, transferring"endoplasmic reticulum | YPL176C	Fig 4A
YPL176C	YPL176C ... TRE1 biological process unknown receptor activity plasma membrane | YPL177C	Fig 4A
YPL180W	YPL180W ... TCO89 glycerol metabolism molecular function unknown plasma membrane* | YPL181W	Fig 4A
YPL181W	YPL181W ... CTI6 positive regulation of transcr transcription factor binding nucleus | YPL182C	Fig 4A
YPL183C	YPL183C … PAC cluster RTT10 biological process unknown molecular function unknown | Cytoplasmic protein with a role in regulation of Ty1 transpositionYPL183W-A	Fig 4A
YPL186C	YPL186C iESR cluster UIP4 biological process unknown molecular function unknown endoplasmic reticulum* | YPL187W	Fig 4A
YPL188W	YPL188W ... POS5 response to oxidative stress* NADH kinase activity mitochondrial matrix | YPL189C-A	Fig 4A
YPL191C	YPL191C ... YPL191C biological process unknown molecular function unknown cytoplasm | YPL192C	Fig 4A
YPL194W	YPL194W ... DDC1 meiosis* molecular function unknown condensed nuclear chromosome | YPL195W	Fig 4A
YPL195W	YPL195W ... APL5 vesicle-mediated transport* molecular function unknown AP-3 adaptor complex | YPL196W	Fig 4A
YPL196W	YPL196W iESR cluster OXR1 response to oxidative stress molecular function unknown mitochondrion | YPL197C	Fig 4A
YPL206C	YPL206C … PGC1 biological process unknown molecular function unknown | Phosphatidyl Glycerol phospholipase C; regulates the phosphatidylglycerol (PG) content via a phospholipase C-type degradation mechanism; contains glycerophosphodiester phosphodiesterase motifsYPL207W	Fig 4A
YPL207W	YPL207W … PAC cluster TYW1 biological process unknown molecular function unknown | Protein required for the synthesis of wybutosine, a modified guanosine found at the 3'-position adjacent to the anticodon of phenylalanine tRNA which supports reading frame maintenance by stabilizing codon-anticodon interactionsYPL208W	Fig 4A
YPL208W	YPL208W … RKM1 biological process unknown molecular function unknown | SET-domain lysine-N-methyltransferase, catalyzes the formation of dimethyllysine residues on the large ribsomal subunit protein L23a (RPL23A and RPL23B)YPL209C	Fig 4A
YPL209C	YPL209C ... IPL1 chromosome segregation* protein kinase activity condensed nuclear chromosome kineto | YPL210C	Fig 4A
YPL212C	YPL212C PAC cluster PUS1 tRNA modification pseudouridylate synthase activity nucleus | YPL213W	Fig 4A
YPL214C	YPL214C ... THI6 thiamin biosynthesis hydroxyethylthiazole kinase activitcytoplasm | YPL215W	Fig 4A
YPL216W	YPL216W ... YPL216W biological process unknown molecular function unknown cellular component unknown | YPL217C	Fig 4A
YPL218W	YPL218W ... SAR1 ER to Golgi transport GTPase activity COPII vesicle coat | YPL219W	Fig 4A
YPL219W	YPL219W ... PCL8 regulation of glycogen biosynt cyclin-dependent protein kinase regcyclin-dependent protein kinase hol | YPL220W	Fig 4A
YPL221W	YPL221W … FLC1 (BOP1) DNA replication initiation* chromatin binding* cytoplasm* | Putative FAD transporter; required for uptake of FAD into endoplasmic reticulum; involved in cell wall maintenanceYPL222W	Fig 4A
YPL222W	YPL222W ... FMP40 biological process unknown molecular function unknown mitochondrion | YPL223C	Fig 4A
YPL224C	YPL224C ... MMT2 iron ion homeostasis molecular function unknown mitochondrion* | YPL225W	Fig 4A
YPL225W	YPL225W ... YPL225W biological process unknown molecular function unknown cytoplasm | YPL226W	Fig 4A
YPL226W	YPL226W PAC cluster NEW1 biological process unknown ATPase activity* cytoplasm* | YPL227C	Fig 4A
YPL227C	YPL227C ... ALG5 N-linked glycosylation dolichyl-phosphate beta-glucosyltraendoplasmic reticulum membrane | YPL228W	Fig 4A
YPL234C	YPL234C ... TFP3 vacuolar acidification hydrogen-transporting ATPase activiintegral to membrane* | YPL235W	Fig 4A
YPL236C	YPL236C ... YPL236C biological process unknown protein kinase activity vacuolar membrane (sensu Fungi) | YPL237W	Fig 4A
YPL237W	YPL237W PAC cluster SUI3 translational initiation translation initiation factor activribosome* | YPL238C	Fig 4A
YPL242C	YPL242C ... IQG1 actin filament organization* cytoskeletal protein binding contractile ring (sensu Saccharomyc | YPL243W	Fig 4A
YPL244C	YPL244C ... HUT1 UDP-galactose transport UDP-galactose transporter activity cellular component unknown | YPL245W	Fig 4A
YPL245W	YPL245W PAC cluster YPL245W biological process unknown molecular function unknown cytoplasm* | YPL246C	Fig 4A
YPL246C	YPL246C ... RBD2 biological process unknown molecular function unknown Golgi apparatus* | YPL247C	Fig 4A
YPL247C	YPL247C ... YPL247C biological process unknown molecular function unknown cytoplasm* | YPL248C	Fig 4A
YPL249C	YPL249C ... GYP5 ER to Golgi transport* Rab GTPase activator activity cytosol* | YPL249C-A	Fig 4A
YPL253C	YPL253C ... VIK1 mitotic sister chromatid cohes microtubule motor activity spindle pole body* | YPL254W	Fig 4A
YPL255W	YPL255W ... BBP1 microtubule nucleation* structural constituent of cytoskelespindle pole body | YPL256C	Fig 4A
YPL259C	YPL259C ... APM1 vesicle-mediated transport clathrin binding AP-1 adaptor complex | YPL260W	Fig 4A
YPL260W	YPL260W ... YPL260W biological process unknown molecular function unknown cytoplasm* | YPL261C	Fig 4A
YPL262W	YPL262W ... FUM1 tricarboxylic acid cycle* fumarate hydratase activity cytosol* | YPL263C	Fig 4A
YPL263C	YPL263C PAC cluster KEL3 biological process unknown molecular function unknown cytoplasm | YPL264C	Fig 4A
YPL264C	YPL264C ... YPL264C biological process unknown molecular function unknown integral to membrane | YPL265W	Fig 4A
YPL269W	YPL269W ... KAR9 nuclear migration, microtubule molecular function unknown mating projection tip* | YPL270W	Fig 4A
YPL270W	YPL270W ... MDL2 aerobic respiration "ATPase activity, coupled to transme"mitochondrial inner membrane | YPL271W	Fig 4A
YPL272C	YPL272C ... YPL272C biological process unknown molecular function unknown cellular component unknown | YPL273W	Fig 4A
YPR003C	YPR003C ... YPR003C biological process unknown molecular function unknown endoplasmic reticulum | YPR004C	Fig 4A
YPR006C	YPR006C ... ICL2 propionate metabolism* methylisocitrate lyase activity mitochondrial matrix | YPR007C	Fig 4A
YPR008W	YPR008W ... HAA1 transcription initiation from specific RNA polymerase II transcrinucleus | YPR009W	Fig 4A
YPR010C	YPR010C PAC cluster RPA135 transcription from RNA polymer DNA-directed RNA polymerase activitDNA-directed RNA polymerase I compl | YPR011C	Fig 4A
YPR011C	YPR011C ... YPR011C transport transporter activity mitochondrial inner membrane | YPR012W	Fig 4A
YPR017C	YPR017C ... DSS4 secretory pathway guanyl-nucleotide exchange factor amembrane fraction* | YPR018W	Fig 4A
YPR021C	YPR021C ... AGC1 L-aspartate transport* L-glutamate transporter activity* mitochondrial inner membrane | YPR022C	Fig 4A
YPR022C	YPR022C ... YPR022C biological process unknown molecular function unknown cytoplasm* | YPR023C	Fig 4A
YPR023C	YPR023C ... EAF3 regulation of transcription fr histone acetyltransferase activity histone acetyltransferase complex* | YPR024W	Fig 4A
YPR024W	YPR024W ... YME1 mitochondrion organization and ATP-dependent peptidase activity mitochondrion* | YPR025C	Fig 4A
YPR026W	YPR026W iESR cluster ATH1 response to stress* "alpha,alpha-trehalase activity" vacuole (sensu Fungi) | YPR027C	Fig 4A
YPR028W	YPR028W ... YOP1 vesicle-mediated transport protein binding integral to membrane | YPR029C	Fig 4A
YPR029C	YPR029C ... APL4 vesicle-mediated transport clathrin binding AP-1 adaptor complex | YPR030W	Fig 4A
YPR031W	YPR031W ... NTO1 biological process unknown molecular function unknown cytoplasm* | YPR032W	Fig 4A
YPR032W	YPR032W ... SRO7 exocytosis* molecular function unknown cytosol* | YPR033C	Fig 4A
YPR033C	YPR033C PAC cluster HTS1 histidyl-tRNA aminoacylation histidine-tRNA ligase activity cytoplasm* | YPR034W	Fig 4A
YPR037C	YPR037C ... ERV2 protein thiol-disulfide exchan thiol oxidase activity microsome | YPR038W	Fig 4A
YPR042C	YPR042C ... PUF2 mRNA catabolism, deadenylylati mRNA binding cytoplasm | YPR043W	Fig 4A
YPR043W	YPR043W RP cluster RPL43A protein biosynthesis structural constituent of ribosome cytosolic large ribosomal subunit ( | YPR044C	Fig 4A
YPR044C	YPR044C … RP cluster OPI11 | Dubious open reading frame unlikely to encode a protein, based on available experimental and comparative sequence data; partially overlaps verified gene RPL43A/YPR043W; deletion confers sensitivity to GSAOYPR045C	Fig 4A
YPR052C	YPR052C ... NHP6A regulation of transcription fr chromatin binding nuclear chromatin* | YPR053C	Fig 4A
YPR055W	YPR055W ... SEC8 cytokinesis* protein binding bud tip* | YPR056W	Fig 4A
YPR061C	YPR061C ... JID1 biological process unknown molecular function unknown mitochondrion | YPR062W	Fig 4A
YPR062W	YPR062W ... FCY1 pyrimidine salvage* cytosine deaminase activity cytoplasm* | YPR063C	Fig 4A
YPR063C	YPR063C ... YPR063C biological process unknown molecular function unknown endoplasmic reticulum | YPR064W	Fig 4A
YPR066W	YPR066W ... UBA3 protein neddylation NEDD8 activating enzyme activity cytoplasm | YPR067W	Fig 4A
YPR067W	YPR067W iESR cluster ISA2 iron ion transport molecular function unknown mitochondrial intermembrane space | YPR068C	Fig 4A
YPR068C	YPR068C ... HOS1 regulation of transcription, D histone deacetylase activity histone deacetylase complex | YPR069C	Fig 4A
YPR070W	YPR070W ... MED1 transcription from RNA polymer RNA polymerase II transcription medmediator complex | YPR071W	Fig 4A
YPR073C	YPR073C ... LTP1 protein amino acid dephosphory protein tyrosine phosphatase activicytoplasm* | YPR074C	Fig 4A
YPR074C	YPR074C PAC cluster TKL1 pentose-phosphate shunt transketolase activity cytoplasm | YPR074W-A	Fig 4A
YPR075C	YPR075C ... OPY2 cell cycle arrest in response molecular function unknown cytoplasm* | YPR076W	Fig 4A
YPR081C	YPR081C ... GRS2 glycyl-tRNA aminoacylation glycine-tRNA ligase activity cytoplasm | YPR082C	Fig 4A
YPR084W	YPR084W ... YPR084W biological process unknown molecular function unknown cellular component unknown | YPR085C	Fig 4A
YPR085C	YPR085C … ASA1 biological process unknown molecular function unknown | Putative protein of unknown function; subunit of the ASTRA complex (Rvb1p, Rvb2p, Tra1p, Tti1p, Tti2, Asa1p and Tra1p) which is part of the chromatin remodeling machineryYPR086W	Fig 4A
YPR093C	YPR093C ... ASR1 response to ethanol molecular function unknown cytoplasm* | YPR094W	Fig 4A
YPR094W	YPR094W ... RDS3 nuclear mRNA splicing, via spl transcription factor activity spliceosome complex | YPR095C	Fig 4A
YPR095C	YPR095C ... SYT1 vesicle-mediated transport* ARF guanyl-nucleotide exchange factmitochondrion | YPR096C	Fig 4A
YPR096C	YPR096C ... | YPR097W	Fig 4A
YPR097W	YPR097W ... YPR097W biological process unknown molecular function unknown mitochondrion | YPR098C	Fig 4A
YPR098C	YPR098C iESR cluster YPR098C biological process unknown molecular function unknown mitochondrion | YPR099C	Fig 4A
YPR103W	YPR103W ... PRE2 ubiquitin-dependent protein ca endopeptidase activity "proteasome core complex, beta-subun" | YPR104C	Fig 4A
YPR105C	YPR105C ... COG4 intra-Golgi transport* molecular function unknown Golgi transport complex | YPR106W	Fig 4A
YPR108W	YPR108W ... RPN7 ubiquitin-dependent protein ca structural molecule activity "proteasome regulatory particle, lid" | YPR108W-A	Fig 4A
YPR109W	YPR109W ... YPR109W biological process unknown molecular function unknown cellular component unknown | YPR110C	Fig 4A
YPR111W	YPR111W ... DBF20 protein amino acid phosphoryla protein serine/threonine kinase actcytoplasm | YPR112C	Fig 4A
YPR113W	YPR113W ... PIS1 cell cycle* CDP-diacylglycerol-inositol 3-phospendoplasmic reticulum* | YPR114W	Fig 4A
YPR115W	YPR115W ... YPR115W biological process unknown molecular function unknown cytoplasm | YPR116W	Fig 4A
YPR116W	YPR116W ... YPR116W biological process unknown molecular function unknown mitochondrion | YPR117W	Fig 4A
YPR118W	YPR118W … PAC cluster MRI1 methionine salvage ribose isomerase activity | 5'-methylthioribose-1-phosphate isomerase; catalyzes the isomerization of 5-methylthioribose-1-phosphate to 5-methylthioribulose-1-phosphate in the methionine salvage pathwayYPR119W	Fig 4A
YPR119W	YPR119W ... CLB2 G2/M transition of mitotic cel cyclin-dependent protein kinase regcytoplasm* | YPR120C	Fig 4A
YPR122W	YPR122W ... AXL1 bud site selection* metalloendopeptidase activity integral to membrane* | YPR123C	Fig 4A
YPR138C	YPR138C ... MEP3 ammonium transport ammonium transporter activity plasma membrane | YPR139C	Fig 4A
YPR139C	YPR139C ... VPS66 protein-vacuolar targeting molecular function unknown cytoplasm | YPR140W	Fig 4A
YPR140W	YPR140W ... TAZ1 phospholipid biosynthesis* acyltransferase activity mitochondrion | YPR141C	Fig 4A
YPR144C	YPR144C PAC cluster NOC4 processing of 20S pre-rRNA* snoRNA binding nucleus* | YPR145W	Fig 4A
YPR146C	YPR146C ... | YPR147C	Fig 4A
YPR147C	YPR147C ... YPR147C biological process unknown molecular function unknown cytoplasm | YPR148C	Fig 4A
YPR149W	YPR149W iESR cluster NCE102 protein secretion molecular function unknown cytoplasm* | YPR150W	Fig 4A
YPR151C	YPR151C iESR cluster SUE1 protein catabolism molecular function unknown mitochondrial membrane | YPR152C	Fig 4A
YPR153W	YPR153W ... YPR153W biological process unknown molecular function unknown cellular component unknown | YPR154W	Fig 4A
YPR155C	YPR155C ... NCA2 aerobic respiration* molecular function unknown mitochondrion | YPR156C	Fig 4A
YPR158W	YPR158W … CUR1 biological process unknown molecular function unknown | Protein of unknown function involved in destabilization of [URE3] prions; similar in sequence to Btn2pYPR159C-A	Fig 4A
YPR159W	YPR159W ... KRE6 cell wall organization and bio glucosidase activity integral to membrane* | YPR160W	Fig 4A
YPR160W	YPR160W ... GPH1 glycogen catabolism glycogen phosphorylase activity cytoplasm | YPR161C	Fig 4A
YPR162C	YPR162C ... ORC4 DNA replication initiation* DNA replication origin binding pre-replicative complex* | YPR163C	Fig 4A
YPR164W	YPR164W ... MMS1 DNA repair* molecular function unknown cellular component unknown | YPR165W	Fig 4A
YPR165W	YPR165W ... RHO1 cell wall organization and bio GTPase activity* mitochondrion* | YPR166C	Fig 4A
YPR167C	YPR167C ... MET16 methionine metabolism* phosphoadenylyl-sulfate reductase (cytoplasm* | YPR168W	Fig 4A
YPR168W	YPR168W ... NUT2 transcription from RNA polymer RNA polymerase II transcription medmediator complex | YPR169W	Fig 4A
YPR172W	YPR172W ... YPR172W biological process unknown molecular function unknown cytoplasm* | YPR173C	Fig 4A
YPR173C	YPR173C ... VPS4 protein-Golgi retention* ATPase activity cytoplasm* | YPR174C	Fig 4A
YPR178W	YPR178W ... PRP4 nuclear mRNA splicing, via spl "RNA splicing factor activity, trans"U4/U6 x U5 tri-snRNP complex | YPR179C	Fig 4A
YPR179C	YPR179C ... HDA3 regulation of transcription, D histone deacetylase activity nucleus* | YPR180W	Fig 4A
YPR184W	YPR184W iESR cluster GDB1 glycogen catabolism 4-alpha-glucanotransferase activitycytoplasm* | YPR185W	Fig 4A
YPR185W	YPR185W ... ATG13 protein-vacuolar targeting* protein binding extrinsic to membrane | YPR186C	Fig 4A
YPR186C	YPR186C ... PZF1 transcription initiation from RNA polymerase III transcription fatranscription factor complex | YPR187W	Fig 4A
YPR188C	YPR188C ... MLC2 cytokinesis, contractile ring myosin II binding contractile ring (sensu Saccharomyc | YPR189W	Fig 4A
YPR189W	YPR189W ... SKI3 mRNA catabolism* translation repressor activity cytoplasm* | YPR190C	Fig 4A
YPR192W	YPR192W ... AQY1 water transport water channel activity plasma membrane | YPR193C	Fig 4A
YPR199C	YPR199C ... ARR1 positive regulation of transcr RNA polymerase II transcription facnucleus | YPR200C	Fig 4A
YHR066W	YHR066W PAC cluster SSF1 ribosomal large subunit assemb rRNA binding nucleolus | YHR067W	Fig 4B
YHR034C	YHR034C ... PIH1 rRNA processing* molecular function unknown cytoplasm* | YHR035W	Fig 4B
YHR131C	YHR131C ... YHR131C biological process unknown molecular function unknown cytoplasm | YHR131W-A	Fig 4B
YHR074W	YHR074W ... QNS1 biological process unknown "hydrolase activity, acting on carbo"cytoplasm* | YHR075C	Fig 4B
YHR001W	YHR001W ... OSH7 steroid biosynthesis oxysterol binding cellular component unknown | YHR001W-A	Fig 4B
YHR013C	YHR013C PAC cluster ARD1 protein amino acid acetylation peptide alpha-N-acetyltransferase acytoplasm* | YHR014W	Fig 4B
YHR089C	YHR089C PAC cluster GAR1 rRNA modification* RNA binding nucleolus* | YHR090C	Fig 4B
YHR199C	YHR199C … AIM46 biological process unknown molecular function unknown mitochondrion | Putative protein of unknown function; the authentic, non-tagged protein is detected in highly purified mitochondria in high-throughput studies; null mutant displays elevated frequency of mitochondrial genome lossYHR199C-A	Fig 4B
YHR032W	YHR032W ... YHR032W biological process unknown molecular function unknown cellular component unknown | YHR032W-A	Fig 4B
YHR103W	YHR103W ... SBE22 cell wall organization and bio molecular function unknown cytoplasm | YHR104W	Fig 4B
YHR205W	YHR205W ... SCH9 protein amino acid phosphoryla protein serine/threonine kinase actcytoplasm* | YHR206W	Fig 4B
YHR194W	YHR194W ... MDM31 mitochondrion organization and molecular function unknown nucleus* | YHR195W	Fig 4B
YHR165C	YHR165C ... PRP8 nuclear mRNA splicing, via spl "RNA splicing factor activity, trans"U4/U6 x U5 tri-snRNP complex* | YHR165W-A	Fig 4B
YHR031C	YHR031C ... RRM3 DNA replication DNA helicase activity* nuclear telomeric heterochromatin | YHR032C-A	Fig 4B
YHR081W	YHR081W ... LRP1 DNA repair* molecular function unknown nuclear exosome (RNase complex) | YHR082C	Fig 4B
YHR040W	YHR040W ... BCD1 snoRNA metabolism nucleic acid binding cytoplasm* | YHR041C	Fig 4B
YHL027W	YHL027W ... RIM101 sporulation (sensu Fungi)* specific transcriptional repressor nucleus | YHL028W	Fig 4B
YHR080C	YHR080C ... YHR080C biological process unknown molecular function unknown mitochondrion | YHR081W	Fig 4B
YHR025W	YHR025W PAC cluster THR1 methionine metabolism* homoserine kinase activity cellular component unknown | YHR026W	Fig 4B
YHL026C	YHL026C ... YHL026C biological process unknown molecular function unknown cellular component unknown | YHL027W	Fig 4B
YHR001W-A	YHR001W-A ... QCR10 aerobic respiration* ubiquinol-cytochrome-c reductase acmitochondrion* | YHR002W	Fig 4B
YHL030W	YHL030W ... ECM29 protein catabolism protein binding cytoplasm* | YHL030W-A	Fig 4B
YHR004C	YHR004C ... NEM1 sporulation (sensu Fungi)* molecular function unknown mitochondrion* | YHR005C	Fig 4B
YHR049W	YHR049W ... FSH1 biological process unknown serine hydrolase activity cytoplasm* | YHR050W	Fig 4B
YHL024W	YHL024W ... RIM4 meiosis* RNA binding cytoplasm | YHL025W	Fig 4B
YHR078W	YHR078W ... YHR078W biological process unknown molecular function unknown cellular component unknown | YHR079C	Fig 4B
YHR128W	YHR128W RP cluster FUR1 pyrimidine salvage uracil phosphoribosyltransferase accellular component unknown | YHR129C	Fig 4B
YHR164C	YHR164C ... DNA2 DNA repair* ATP-dependent DNA helicase activitynucleus* | YHR165C	Fig 4B
YHR071W	YHR071W ... PCL5 cell cycle cyclin-dependent protein kinase regcyclin-dependent protein kinase hol | YHR072W	Fig 4B
YHR039C-A	YHR039C-A ... VMA10 vacuolar acidification* hydrogen-transporting ATPase activihydrogen-transporting ATPase V1 dom | YHR040W	Fig 4B
YHR061C	YHR061C ... GIC1 establishment of cell polarity small GTPase regulator activity bud neck* | YHR062C	Fig 4B
YPR020W	YPR020W ... ATP20 ATP synthesis coupled proton t structural molecule activity proton-transporting ATP synthase co | YPR021C	Fig 4B
YPL273W	YPL273W PAC cluster SAM4 sulfur amino acid metabolism homocysteine S-methyltransferase accytoplasm* | YPL274W	Fig 4B
YPL274W	YPL274W ... SAM3 S-adenosylmethionine transport S-adenosylmethionine transporter acplasma membrane | YPL277C	Fig 4B
YPL213W	YPL213W ... LEA1 nuclear mRNA splicing, via spl "RNA splicing factor activity, trans"cytoplasm* | YPL214C	Fig 4B
YPL037C	YPL037C PAC cluster EGD1 nascent polypeptide associatio unfolded protein binding cytosolic ribosome (sensu Eukaryota | YPL038W	Fig 4B
YPR198W	YPR198W ... SGE1 response to drug* xenobiotic-transporting ATPase actiintegral to plasma membrane | YPR199C	Fig 4B
YPR120C	YPR120C ... CLB5 G1/S transition of mitotic cel cyclin-dependent protein kinase regnucleus | YPR121W	Fig 4B
YPL049C	YPL049C ... DIG1 invasive growth (sensu Sacchar DNA binding* nucleus | YPL050C	Fig 4B
YPR193C	YPR193C ... HPA2 histone acetylation histone acetyltransferase activity cytoplasm | YPR194C	Fig 4B
YPL118W	YPL118W ... MRP51 protein biosynthesis* structural constituent of ribosome mitochondrial small ribosomal subun | YPL119C	Fig 4B
YPL081W	YPL081W RP cluster RPS9A protein biosynthesis* structural constituent of ribosome cytoplasm* | YPL082C	Fig 4B
YPL112C	YPL112C ... PEX25 peroxisome organization and bi molecular function unknown peroxisomal membrane | YPL113C	Fig 4B
YPL108W	YPL108W ... YPL108W biological process unknown molecular function unknown cytoplasm | YPL109C	Fig 4B
YPL093W	YPL093W ... NOG1 ribosome-nucleus export GTPase activity nucleolus | YPL094C	Fig 4B
YPL127C	YPL127C ... HHO1 regulation of transcription, D DNA binding nucleus* | YPL128C	Fig 4B
YPR176C	YPR176C ... BET2 protein amino acid geranylgera Rab-protein geranylgeranyltransferaRab-protein geranylgeranyltransfera | YPR177C	Fig 4B
YPR110C	YPR110C PAC cluster RPC40 transcription from RNA polymer DNA-directed RNA polymerase activitDNA-directed RNA polymerase III com | YPR111W	Fig 4B
YPL124W	YPL124W ... SPC29 microtubule nucleation* structural constituent of cytoskelecentral plaque of spindle pole body | YPL125W	Fig 4B
YPL063W	YPL063W ... TIM50 mitochondrial matrix protein i molecular function unknown mitochondrial inner membrane preseq | YPL064C	Fig 4B
YPL055C	YPL055C ... LGE1 meiosis* molecular function unknown nucleus | YPL056C	Fig 4B
YPR125W	YPR125W … YLH47 biological process unknown molecular function unknown | Mitochondrial inner membrane protein exposed to the mitochondrial matrix, associates with mitochondrial ribosomes, NOT required for respiratory growth; homolog of human Letm1, a protein implicated in Wolf-Hirschhorn syndromeYPR126C	Fig 4B
YPR034W	YPR034W PAC cluster ARP7 chromatin remodeling general RNA polymerase II transcripnucleus* | YPR035W	Fig 4B
YPL183W-A	YPL183W-A … RTC6 biological process unknown molecular function unknown | Homolog of the prokaryotic ribosomal protein L36, likely to be a mitochondrial ribosomal protein coded in the nuclear genome; null mutation suppresses cdc13-1 temperature sensitivityYPL184C	Fig 4B
YPR166C	YPR166C ... MRP2 protein biosynthesis structural constituent of ribosome mitochondrial small ribosomal subun | YPR167C	Fig 4B
YPL223C	YPL223C ... GRE1 response to stress* molecular function unknown cytoplasm | YPL224C	Fig 4B
YPR148C	YPR148C ... YPR148C biological process unknown molecular function unknown cytoplasm | YPR149W	Fig 4B
YPR154W	YPR154W ... PIN3 actin cytoskeleton organizatio molecular function unknown cytoplasm* | YPR155C	Fig 4B
YPR175W	YPR175W ... DPB2 nucleotide-excision repair* epsilon DNA polymerase activity cytoplasm* | YPR176C	Fig 4B
YPL105C	YPL105C … SYH1 biological process unknown molecular function unknown | Protein of unknown function that may interact with ribosomes, based on co-purification experiments; authentic, non-tagged protein is detected in highly purified mitochondria in high-throughput studiesYPL106C	Fig 4B
YPR104C	YPR104C ... FHL1 rRNA processing* transcription factor activity nucleus* | YPR105C	Fig 4B
YPR040W	YPR040W ... TIP41 signal transduction molecular function unknown cytoplasm* | YPR041W	Fig 4B
YPL023C	YPL023C ... MET12 methionine metabolism methylenetetrahydrofolate reductasecytoplasm | YPL024W	Fig 4B
YPR183W	YPR183W ... DPM1 N-linked glycosylation* "transferase activity, transferring"mitochondrion* | YPR184W	Fig 4B
YPL233W	YPL233W ... NSL1 chromosome segregation molecular function unknown kinetochore* | YPL234C	Fig 4B
YPR174C	YPR174C ... YPR174C biological process unknown molecular function unknown nuclear membrane* | YPR175W	Fig 4B
YPL235W	YPL235W PAC cluster RVB2 regulation of transcription fr ATPase activity nucleus* | YPL236C	Fig 4B
YPR128C	YPR128C ... ANT1 peroxisome organization and bi adenine nucleotide transporter acticytoplasm* | YPR129W	Fig 4B
YPR088C	YPR088C ... SRP54 protein-ER targeting* GTPase activity* signal recognition particle (sensu | YPR089W	Fig 4B
YPR051W	YPR051W ... MAK3 N-terminal protein amino acid peptide alpha-N-acetyltransferase acytoplasm | YPR052C	Fig 4B
YPL131W	YPL131W ... RPL5 protein biosynthesis* structural constituent of ribosome*cytosolic large ribosomal subunit ( | YPL132W	Fig 4B
YPL222C-A	YPL222C-A … Dubious Identified by gene-trapping, microarray-based expression analysis, and genome-wide homology searchingYPL250W-A	Fig 4B
YPL232W	YPL232W ... SSO1 vesicle fusion* t-SNARE activity integral to plasma membrane | YPL233W	Fig 4B
YPR187W	YPR187W PAC cluster RPO26 transcription from RNA polymer DNA-directed RNA polymerase activitDNA-directed RNA polymerase III com | YPR188C	Fig 4B
YPL029W	YPL029W ... SUV3 RNA catabolism ATP-dependent RNA helicase activitymitochondrion* | YPL030W	Fig 4B
YPL178W	YPL178W ... CBC2 nuclear mRNA splicing, via spl RNA cap binding commitment complex* | YPL179W	Fig 4B
YPL132W	YPL132W ... COX11 aerobic respiration* copper ion binding mitochondrial inner membrane* | YPL133C	Fig 4B
YPL012W	YPL012W ... RRP12 processing of 20S pre-rRNA* molecular function unknown nucleus* | YPL013C	Fig 4B
YPL271W	YPL271W ... ATP15 ATP synthesis coupled proton t hydrogen-transporting ATP synthase "proton-transporting ATP synthase, c" | YPL272C	Fig 4B
YPL228W	YPL228W ... CET1 mRNA capping polynucleotide 5'-phosphatase activnucleus | YPL229W	Fig 4B
YPL065W	YPL065W ... VPS28 protein-vacuolar targeting* molecular function unknown endosome* | YPL066W	Fig 4B
YPR036W	YPR036W ... VMA13 vacuolar acidification hydrogen-transporting ATPase activivacuolar membrane (sensu Fungi)* | YPR036W-A	Fig 4B
YPL215W	YPL215W ... CBP3 protein complex assembly molecular function unknown mitochondrial membrane | YPL216W	Fig 4B
YPL139C	YPL139C ... UME1 regulation of meiosis transcription corepressor activity nucleus | YPL140C	Fig 4B
YPL204W	YPL204W ... HRR25 DNA repair* casein kinase activity nucleus* | YPL205C	Fig 4B
YPL155C	YPL155C ... KIP2 nuclear migration, microtubule microtubule motor activity mitochondrion* | YPL156C	Fig 4B
YPL248C	YPL248C ... GAL4 regulation of transcription, D transcriptional activator activity nucleus | YPL249C	Fig 4B
YPL089C	YPL089C ... RLM1 cell wall organization and bio DNA binding* nucleus | YPL090C	Fig 4B
YPR002W	YPR002W ... PDH1 propionate metabolism molecular function unknown cytoplasm* | YPR003C	Fig 4B
YPL184C	YPL184C … MRN1 biological process unknown molecular function unknown | RNA-binding protein proposed to be involved in translational regulation; binds specific categories of mRNAs, including those that contain upstream open reading frames (uORFs) and internal ribosome entry sites (IRES)YPL185W	Fig 4B
YPL056C	YPL056C ... YPL056C biological process unknown molecular function unknown cellular component unknown | YPL057C	Fig 4B
YPL254W	YPL254W ... HFI1 transcription from RNA polymer transcription cofactor activity SAGA complex* | YPL255W	Fig 4B
YPL017C	YPL017C … IRC15 biological process unknown S-adenosylmethionine-dependent | Microtubule associated protein; regulates microtubule dynamics; required for accurate meiotic chromosome segregation; null mutant displays large budded cells due to delayed mitotic progression, increased levels of spontaneous Rad52 fociYPL018W	Fig 4B
YPL031C	YPL031C ... PHO85 protein amino acid phosphoryla cyclin-dependent protein kinase actnucleus | YPL032C	Fig 4B
YPL115C	YPL115C ... BEM3 establishment of cell polarity signal transducer activity* intracellular | YPL116W	Fig 4B
YPL040C	YPL040C ... ISM1 protein biosynthesis* isoleucine-tRNA ligase activity mitochondrion | YPL041C	Fig 4B
YPL003W	YPL003W ... ULA1 protein neddylation NEDD8 activating enzyme activity cellular component unknown | YPL004C	Fig 4B
YPL085W	YPL085W ... SEC16 vesicle-mediated transport* structural molecule activity endoplasmic reticulum membrane* | YPL086C	Fig 4B
YPR041W	YPR041W PAC cluster TIF5 regulation of translational in translation initiation factor activcytosolic small ribosomal subunit ( | YPR042C	Fig 4B
YPR141C	YPR141C ... KAR3 meiosis* microtubule motor activity* spindle pole body* | YPR142C	Fig 4B
YPR083W	YPR083W ... MDM36 mitochondrion organization and molecular function unknown cellular component unknown | YPR084W	Fig 4B
YPR135W	YPR135W ... CTF4 DNA repair* DNA binding nucleus* | YPR136C	Fig 4B
YPL084W	YPL084W ... BRO1 ubiquitin-dependent protein ca intracellular transporter activity cytoplasm* | YPL085W	Fig 4B
YPR030W	YPR030W ... CSR2 cell wall organization and bio molecular function unknown nucleus | YPR031W	Fig 4B
YPL068C	YPL068C ... YPL068C biological process unknown molecular function unknown nucleus | YPL069C	Fig 4B
YPR056W	YPR056W ... TFB4 transcription initiation from general RNA polymerase II transcriptranscription factor TFIIH complex | YPR057W	Fig 4B
YPL126W	YPL126W ... NAN1 processing of 20S pre-rRNA snoRNA binding small nucleolar ribonucleoprotein c | YPL127C	Fig 4B
YPR004C	YPR004C … AIM45 biological process unknown electron carrier activity | Protein with similarity to mammalian electron transfer flavoprotein complex subunit ETF-alpha; interacts with frataxin, Yfh1p; null mutant displays elevated frequency of mitochondrial genome lossYPR005C	Fig 4B
YPL098C	YPL098C … MGR2 biological process unknown molecular function unknown | Protein required for growth of cells lacking the mitochondrial genomeYPL099C	Fig 4B
YPR047W	YPR047W ... MSF1 protein biosynthesis phenylalanine-tRNA ligase activity mitochondrion | YPR048W	Fig 4B
YPL076W	YPL076W ... GPI2 GPI anchor biosynthesis molecular function unknown endoplasmic reticulum* | YPL077C	Fig 4B
YPL153C	YPL153C ... RAD53 DNA repair* protein threonine/tyrosine kinase anucleus | YPL154C	Fig 4B
YPL241C	YPL241C ... CIN2 microtubule-based process molecular function unknown cellular component unknown | YPL242C	Fig 4B
YPL007C	YPL007C ... TFC8 transcription initiation from RNA polymerase III transcription fatranscription factor TFIIIC complex | YPL008W	Fig 4B
YPR048W	YPR048W ... TAH18 biological process unknown molecular function unknown cellular component unknown | YPR049C	Fig 4B
YPR181C	YPR181C ... SEC23 ER to Golgi transport* GTPase activator activity cytoplasm* | YPR182W	Fig 4B
YPL179W	YPL179W ... PPQ1 protein amino acid dephosphory protein serine/threonine phosphatascytoplasm | YPL180W	Fig 4B
YPL016W	YPL016W ... SWI1 chromatin remodeling general RNA polymerase II transcripSWI/SNF complex* | YPL017C	Fig 4B
YPR019W	YPR019W … MCM4 DNA replication initiation* chromatin binding* cytoplasm* | Essential helicase component of heterohexameric MCM2-7 complexes which bind pre-replication complexes on DNA and melt the DNA prior to replication; accumulates in the nucleus in G1; homolog of S. pombe Cdc21pYPR020W	Fig 4B
YPL172C	YPL172C ... COX10 protein complex assembly* protoheme IX farnesyltransferase acmitochondrial inner membrane | YPL173W	Fig 4B
YPR071W	YPR071W ... YPR071W biological process unknown molecular function unknown integral to membrane | YPR072W	Fig 4B
YPR079W	YPR079W ... MRL1 vacuolar transport signal sequence binding cytoplasm* | YPR080W	Fig 4B
YPR121W	YPR121W ... THI22 thiamin biosynthesis phosphomethylpyrimidine kinase acticellular component unknown | YPR122W	Fig 4B
YPL032C	YPL032C ... SVL3 endocytosis molecular function unknown cytoplasm* | YPL033C	Fig 4B
YPL006W	YPL006W ... NCR1 sphingolipid metabolism sphingolipid transporter activity vacuolar membrane (sensu Fungi) | YPL007C	Fig 4B
YPL001W	YPL001W ... HAT1 chromatin silencing at telomer H3/H4 histone acetyltransferase actcytoplasm* | YPL002C	Fig 4B
YPL058C	YPL058C ... PDR12 transport* xenobiotic-transporting ATPase actiplasma membrane | YPL059W	Fig 4B
YPL144W	YPL144W … POC4 biological process unknown molecular function unknown | Component of a heterodimeric Poc4p-Irc25p chaperone involved in assembly of alpha subunits into the 20S proteasome; may regulate formation of proteasome isoforms with alternative subunits under different conditionsYPL145C	Fig 4B
YPL145C	YPL145C ... KES1 vesicle-mediated transport* oxysterol binding cytoplasm* | YPL146C	Fig 4B
YPR114W	YPR114W ... YPR114W biological process unknown molecular function unknown endoplasmic reticulum | YPR115W	Fig 4B
YPL163C	YPL163C ... SVS1 response to chemical substance molecular function unknown cell wall (sensu Fungi)* | YPL164C	Fig 4B
YPR091C	YPR091C ... YPR091C biological process unknown molecular function unknown endoplasmic reticulum | YPR092W	Fig 4B
YPL092W	YPL092W ... SSU1 sulfite transport sulfite transporter activity plasma membrane | YPL093W	Fig 4B
YPL257W	YPL257W ... YPL257W biological process unknown molecular function unknown cellular component unknown | YPL258C	Fig 4B
YPR106W	YPR106W ... ISR1 biological process unknown protein kinase activity cellular component unknown | YPR107C	Fig 4B
YPR005C	YPR005C ... HAL1 positive regulation of transcr molecular function unknown cytoplasm | YPR006C	Fig 4B
YPL041C	YPL041C ... YPL041C biological process unknown molecular function unknown cellular component unknown | YPL042C	Fig 4B
YPR016C	YPR016C PAC cluster TIF6 ribosomal large subunit biogen molecular function unknown cytoplasm* | YPR016W-A	Fig 4B
YPL128C	YPL128C ... TBF1 loss of chromatin silencing DNA binding* nucleus* | YPL129W	Fig 4B
YPL094C	YPL094C ... SEC62 posttranslational protein-memb protein binding* endoplasmic reticulum membrane* | YPL095C	Fig 4B
YPR009W	YPR009W ... SUT2 regulation of transcription fr specific RNA polymerase II transcrinucleus | YPR010C	Fig 4B
YPR087W	YPR087W … VPS69 | Dubious open reading frame, unlikely to encode a protein; not conserved in closely related Saccharomyces species; 85% of ORF overlaps the verified gene SRP54; deletion causes a vacuolar protein sorting defectYPR088C	Fig 4B
YLR130C	YLR130C ... ZRT2 low-affinity zinc ion transpor low-affinity zinc ion transporter aplasma membrane | YLR131C	Class 1
YLR405W	YLR405W PAC cluster DUS4 tRNA modification tRNA dihydrouridine synthase activicellular component unknown | YLR406C	Class 1
YLR241W	YLR241W ... YLR241W biological process unknown molecular function unknown cellular component unknown | YLR242C	Class 1
YLR434C	YLR434C ... | YLR435W	Class 1
YLR320W	YLR320W ... MMS22 double-strand break repair molecular function unknown nucleus | YLR321C	Class 1
YLR010C	YLR010C ... TEN1 telomere capping molecular function unknown nuclear telomere cap complex | YLR011W	Class 1
YLR460C	YLR460C ... YLR460C biological process unknown molecular function unknown cellular component unknown | YLR461W	Class 1
YLR178C	YLR178C iESR cluster TFS1 regulation of proteolysis and lipid binding* soluble fraction | YLR179C	Class 1
YLR337C	YLR337C ... VRP1 endocytosis* actin binding actin cortical patch | YLR338W	Class 1
YLR139C	YLR139C ... SLS1 protein biosynthesis* molecular function unknown integral to membrane* | YLR140W	Class 1
YLR464W	YLR464W ... YLR464W biological process unknown molecular function unknown cellular component unknown | YLR465C	Class 1
YLR070C	YLR070C ... XYL2 monosaccharide metabolism D-xylulose reductase activity cellular component unknown | YLR071C	Class 1
YLR268W	YLR268W ... SEC22 ER to Golgi transport* v-SNARE activity endoplasmic reticulum* | YLR269C	Class 1
YLR034C	YLR034C ... SMF3 intracellular sequestering of iron ion transporter activity vacuolar membrane (sensu Fungi) | YLR035C	Class 1
YLR379W	YLR379W ... | YLR380W	Class 1
YLR418C	YLR418C ... CDC73 RNA elongation from RNA polyme RNA polymerase II transcription elonucleus* | YLR419W	Class 1
YLR374C	YLR374C ... | YLR375W	Class 1
YLR136C	YLR136C ... TIS11 mRNA catabolism* mRNA binding cytoplasm* | YLR137W	Class 1
YLR097C	YLR097C ... HRT3 ubiquitin-dependent protein ca ubiquitin-protein ligase activity nuclear ubiquitin ligase complex | YLR098C	Class 1
YLR008C	YLR008C ... PAM18 mitochondrial matrix protein i unfolded protein binding* mitochondrial inner membrane preseq | YLR009W	Class 1
YLR437C-A	YLR437C-A … Dubious Dubious open reading frame unlikely to encode a protein, based on available experimental and comparative sequence data; partially overlaps the verified ORF CAR2/YLR438WYLR466C-A	Class 1
YLR198C	YLR198C PAC cluster | YLR199C	Class 1
YLR347W-A	YLR347W-A … Dubious Dubious open reading frame unlikely to encode a protein, based on available experimental and comparative sequence data; overlaps the verified ORF KAP95/YLR347CYLR364C-A	Class 1
YLR083C	YLR083C PAC cluster EMP70 transport transporter activity membrane fraction* | YLR084C	Class 1
YLR020C	YLR020C ... YEH2 cell wall mannoprotein biosynt sterol esterase activity plasma membrane* | YLR021W	Class 1
YLR033W	YLR033W ... RSC58 chromatin remodeling molecular function unknown RSC complex | YLR034C	Class 1
YLR380W	YLR380W ... CSR1 cell wall organization and bio phosphatidylinositol transporter accytoplasm* | YLR381W	Class 1
YLR176C	YLR176C ... RFX1 negative regulation of transcr specific transcriptional repressor cytoplasm* | YLR177W	Class 1
YLR370C	YLR370C iESR cluster ARC18 actin filament organization* structural constituent of cytoskeleArp2/3 protein complex | YLR371W	Class 1
YLR151C	YLR151C ... PCD1 biological process unknown pyrophosphatase activity peroxisome | YLR152C	Class 1
YLR115W	YLR115W ... CFT2 mRNA polyadenylylation* RNA binding mRNA cleavage and polyadenylation s | YLR116W	Class 1
YLR146W-A	YLR146W-A YLR146W-A YPR145C-A	Class 1
YLR415C	YLR415C ... YLR415C biological process unknown molecular function unknown cellular component unknown | YLR416C	Class 1
YLR245C	YLR245C ... CDD1 cytidine catabolism* cytidine deaminase activity cytoplasm* | YLR246W	Class 1
YLR392C	YLR392C ... YLR392C biological process unknown molecular function unknown cytoplasm | YLR393W	Class 1
YLR378C	YLR378C ... SEC61 protein-ER targeting* protein transporter activity integral to endoplasmic reticulum m | YLR379W	Class 1
YLR386W	YLR386W ... VAC14 vacuole inheritance* enzyme activator activity vacuolar membrane (sensu Fungi)* | YLR387C	Class 1
YLL010C	YLL010C ... PSR1 response to stress phosphoprotein phosphatase activityplasma membrane | YLL011W	Class 1
YLL032C	YLL032C ... YLL032C biological process unknown molecular function unknown cytoplasm | YLL033W	Class 1
YLR174W	YLR174W ... IDP2 glutamate biosynthesis* isocitrate dehydrogenase (NADP+) accytosol | YLR175W	Class 1
YLR287C-A	YLR287C-A ... RPS30A protein biosynthesis structural constituent of ribosome cytosolic small ribosomal subunit ( | YLR288C	Class 1
YLR263W	YLR263W ... RED1 synaptonemal complex formation molecular function unknown synaptonemal complex | YLR264C-A	Class 1
YLR288C	YLR288C ... MEC3 chromatin silencing at telomer DNA binding nucleus | YLR289W	Class 1
YHR007C	YHR007C ... ERG11 ergosterol biosynthesis sterol 14-demethylase activity endoplasmic reticulum | YHR007C-A	Class 1
YLR014C	YLR014C ... PPR1 regulation of transcription, D transcription factor activity nucleus | YLR015W	Class 1
YLR397C	YLR397C PAC cluster AFG2 response to drug ATPase activity intracellular | YLR398C	Class 1
YLR216C	YLR216C ... CPR6 protein folding unfolded protein binding* cytoplasm | YLR217W	Class 1
YLR063W	YLR063W PAC cluster YLR063W biological process unknown molecular function unknown cytoplasm | YLR064W	Class 1
YLR220W	YLR220W ... CCC1 iron ion homeostasis* molecular function unknown Golgi apparatus* | YLR221C	Class 1
YLR368W	YLR368W ... MDM30 mitochondrion organization and molecular function unknown mitochondrion | YLR369W	Class 1
YLR272C	YLR272C ... YCS4 mitotic chromosome condensatio molecular function unknown nuclear condensin complex | YLR273C	Class 1
YLR369W	YLR369W ... SSQ1 DNA-dependent DNA replication* unfolded protein binding mitochondrial matrix | YLR370C	Class 1
YLR148W	YLR148W ... PEP3 late endosome to vacuole trans protein binding vacuolar membrane (sensu Fungi)* | YLR149C	Class 1
YLR290C	YLR290C iESR cluster YLR290C biological process unknown molecular function unknown mitochondrion | YLR291C	Class 1
YLR009W	YLR009W PAC cluster RLP24 ribosomal large subunit biogen molecular function unknown nucleolus | YLR010C	Class 1
YLR412W	YLR412W … PAC cluster BER1 biological process unknown molecular function unknown | Protein involved in microtubule-related processes, N-acetylation; GFP-fusion protein localizes to the cytoplasm and is induced in response to the DNA-damaging agent MMS; YLR412W is not an essential gene; similar to Arabidopsis SRR1 geneYLR413W	Class 1
YLL036C	YLL036C PAC cluster PRP19 nuclear mRNA splicing, via spl "RNA splicing factor activity, trans"cytoplasm* | YLL037W	Class 1
YLR359W	YLR359W ... ADE13 purine nucleotide biosynthesis adenylosuccinate lyase activity cellular component unknown | YLR360W	Class 1
YLR024C	YLR024C ... UBR2 protein monoubiquitination* ubiquitin-protein ligase activity cytoplasm | YLR025W	Class 1
YLR057W	YLR057W ... YLR057W biological process unknown molecular function unknown cellular component unknown | YLR058C	Class 1
YLR381W	YLR381W ... CTF3 chromosome segregation protein binding condensed nuclear chromosome kineto | YLR382C	Class 1
YLR084C	YLR084C ... RAX2 bud site selection molecular function unknown mitochondrion* | YLR085C	Class 1
YLR208W	YLR208W ... SEC13 ER to Golgi transport* structural molecule activity cytoplasm* | YLR209C	Class 1
YLR222C	YLR222C PAC cluster UTP13 processing of 20S pre-rRNA snoRNA binding small nucleolar ribonucleoprotein c | YLR223C	Class 1
YLR060W	YLR060W PAC cluster FRS1 phenylalanyl-tRNA aminoacylati phenylalanine-tRNA ligase activity cytoplasm* | YLR061W	Class 1
YLR128W	YLR128W ... DCN1 biological process unknown molecular function unknown cellular component unknown | YLR129W	Class 1
YLR229C	YLR229C ... CDC42 establishment of cell polarity GTPase activity* plasma membrane* | YLR230W	Class 1
YLR224W	YLR224W ... YLR224W ubiquitin-dependent protein ca protein binding ubiquitin ligase complex | YLR225C	Class 1
YLR129W	YLR129W PAC cluster DIP2 processing of 20S pre-rRNA snoRNA binding small nucleolar ribonucleoprotein c | YLR130C	Class 1
YLR096W	YLR096W ... KIN2 exocytosis protein kinase activity plasma membrane* | YLR097C	Class 1
YLL007C	YLL007C ... YLL007C biological process unknown molecular function unknown cytoplasm | YLL008W	Class 1
YLR274W	YLR274W … MCM5 DNA replication initiation* chromatin binding* cytoplasm* | Component of the hexameric MCM complex, which is important for priming origins of DNA replication in G1 and becomes an active ATP-dependent helicase that promotes DNA melting and elongation when activated by Cdc7p-Dbf4p in S-phaseYLR275W	Class 1
YLR145W	YLR145W ... RMP1 rRNA processing* molecular function unknown cytoplasm* | YLR146C	Class 1
YLR002C	YLR002C PAC cluster NOC3 rRNA processing* protein binding* nucleus* | YLR003C	Class 1
YLR238W	YLR238W ... FAR10 cell cycle arrest in response molecular function unknown endoplasmic reticulum | YLR239C	Class 1
YLR451W	YLR451W ... LEU3 regulation of transcription fr specific RNA polymerase II transcrinucleus | YLR452C	Class 1
YLR301W	YLR301W ... YLR301W cotranslational protein-membra molecular function unknown endoplasmic reticulum membrane | YLR302C	Class 1
YLR056W	YLR056W ... ERG3 ergosterol biosynthesis C-5 sterol desaturase activity endoplasmic reticulum | YLR057W	Class 1
YHL038C	YHL038C ... CBP2 Group I intron splicing "RNA splicing factor activity, trans"mitochondrion | YHL039W	Class 1
YLR127C	YLR127C ... APC2 mitotic sister chromatid segre protein binding* anaphase-promoting complex | YLR128W	Class 1
YLR384C	YLR384C ... IKI3 regulation of transcription fr RNA polymerase II transcription elotranscription elongation factor com | YLR385C	Class 1
YHL013C	YHL013C … PAC cluster OTU2 biological process unknown molecular function unknown | Protein of unknown function that may interact with ribosomes, based on co-purification experiments; member of the ovarian tumor-like (OTU) superfamily of predicted cysteine proteases; shows cytoplasmic localizationYHL014C	Class 1
YLR443W	YLR443W ... ECM7 cell wall organization and bio molecular function unknown integral to membrane | YLR444C	Class 1
YHR066W	YHR066W PAC cluster SSF1 ribosomal large subunit assemb rRNA binding nucleolus | YHR067W	Class 1
YHR191C	YHR191C ... CTF8 mitotic sister chromatid cohes molecular function unknown DNA replication factor C complex | YHR192W	Class 1
YHR181W	YHR181W ... SVP26 biological process unknown molecular function unknown endoplasmic reticulum | YHR182C-A	Class 1
YHL039W	YHL039W PAC cluster YHL039W biological process unknown molecular function unknown cytoplasm | YHL040C	Class 1
YHR069C	YHR069C ... RRP4 35S primary transcript process 3'-5'-exoribonuclease activity nuclear exosome (RNase complex)* | YHR069C-A	Class 1
YLR430W	YLR430W ... SEN1 35S primary transcript process ATP-dependent RNA helicase activitynucleus | YLR431C	Class 1
YHR142W	YHR142W ... CHS7 ER to Golgi transport* molecular function unknown endoplasmic reticulum membrane | YHR143W	Class 1
YHR060W	YHR060W ... VMA22 protein complex assembly* unfolded protein binding endoplasmic reticulum membrane | YHR061C	Class 1
YHR027C	YHR027C ... RPN1 ubiquitin-dependent protein ca endopeptidase activity* cytoplasm* | YHR028C	Class 1
YHR101C	YHR101C ... BIG1 cell wall biosynthesis (sensu molecular function unknown endoplasmic reticulum* | YHR102W	Class 1
YHR072W	YHR072W ... ERG7 ergosterol biosynthesis lanosterol synthase activity endoplasmic reticulum* | YHR072W-A	Class 1
YHR042W	YHR042W PAC cluster NCP1 ergosterol biosynthesis electron transporter activity mitochondrion* | YHR043C	Class 1
YHL007C	YHL007C ... STE20 protein amino acid phosphoryla protein serine/threonine kinase actincipient bud site* | YHL008C	Class 1
YHL017W	YHL017W ... YHL017W biological process unknown molecular function unknown clathrin-coated vesicle | YHL018W	Class 1

## Sheet: Amp. genes - lower expression
UID	NAME	Called Lower-than-expected in:
YAL020C	YAL020C ... ATS1 budding cell bud growth* molecular function unknown cytoplasm | YAL021C	Y2189	Y2189 vs related control
YAL032C	YAL032C ... PRP45 positive regulation of transcr transcriptional activator activity nucleus | YAL033W	Y2189	Y2189 vs related control
YAR010C	YAR010C YAR010C ò TRANSPOSABLE TY ELEMENTYAR019W-A	Y2189	Y2189 vs related control
YCL010C	YCL010C ... SGF29 histone acetylation molecular function unknown SAGA complex | YCL011C	Y2189	Y2189 vs related control
YCL010C	YCL010C ... SGF29 histone acetylation molecular function unknown SAGA complex | YCL011C	K1	K1 vs related control
YCL012C	YCL012C ... YCL012C biological process unknown molecular function unknown cellular component unknown | YCL014W	K1	K1 vs related control
YCL024W	YCL024W ... KCC4 protein amino acid phosphoryla protein kinase activity bud neck | YCL025C	K1	K1 vs related control
YCL028W	YCL028W ... RNQ1 biological process unknown molecular function unknown cytosol | YCL029C	Y2189	Y2189 vs related control
YCL028W	YCL028W ... RNQ1 biological process unknown molecular function unknown cytosol | YCL029C	K1	K1 vs related control
YCL029C	YCL029C ... BIK1 mitotic spindle organization a microtubule binding spindle pole body* | YCL030C	Y2189	Y2189 vs related control
YCL029C	YCL029C ... BIK1 mitotic spindle organization a microtubule binding spindle pole body* | YCL030C	K1	K1 vs related control
YCL030C	YCL030C ... HIS4 histidine biosynthesis phosphoribosyl-ATP diphosphatase acintracellular | YCL031C	K1	K1 vs related control
YCL034W	YCL034W ... LSB5 endocytosis* molecular function unknown cell cortex | YCL035C	K1	K1 vs related control
YCL049C	YCL049C ... YCL049C biological process unknown molecular function unknown membrane fraction | YCL050C	K1	K1 vs related control
YCL054W	YCL054W PAC cluster SPB1 processing of 27S pre-rRNA S-adenosylmethionine-dependent methnucleus* | YCL055W	K1	K1 vs related control
YCL056C	YCL056C ... YCL056C biological process unknown molecular function unknown cytoplasm | YCL057C-A	K1	K1 vs related control
YCL059C	YCL059C PAC cluster KRR1 rRNA processing* molecular function unknown nucleolus* | YCL061C	K1	K1 vs related control
YCL061C	YCL061C ... MRC1 chromatin silencing at telomer molecular function unknown nucleus* | YCL063W	K1	K1 vs related control
YCR003W	YCR003W ... MRPL32 protein biosynthesis structural constituent of ribosome mitochondrial large ribosomal subun | YCR004C	Y2189	Y2189 vs related control
YCR003W	YCR003W ... MRPL32 protein biosynthesis structural constituent of ribosome mitochondrial large ribosomal subun | YCR004C	K1	K1 vs related control
YCR006C	YCR006C ... | YCR007C	K1	K1 vs related control
YCR014C	YCR014C ... POL4 double-strand break repair via beta DNA polymerase activity nucleus | YCR015C	K1	K1 vs related control
YCR020C-A	YCR020C-A ... MAK31 N-terminal protein amino acid amino-acid N-acetyltransferase acticellular component unknown | YCR020W-B	K1	K1 vs related control
YCR020W-B	YCR020W-B ... HTL1 regulation of cell cycle* molecular function unknown RSC complex | YCR021C	K1	K1 vs related control
YCR033W	YCR033W ... SNT1 histone deacetylation* NAD-dependent histone deacetylase ahistone deacetylase complex | YCR034W	K1	K1 vs related control
YCR046C	YCR046C ... IMG1 protein biosynthesis structural constituent of ribosome mitochondrial large ribosomal subun | YCR047C	Y2189	Y2189 vs related control
YCR046C	YCR046C ... IMG1 protein biosynthesis structural constituent of ribosome mitochondrial large ribosomal subun | YCR047C	K1	K1 vs related control
YCR052W	YCR052W ... RSC6 chromatin remodeling molecular function unknown RSC complex | YCR053W	Y2189	Y2189 vs related control
YCR052W	YCR052W ... RSC6 chromatin remodeling molecular function unknown RSC complex | YCR053W	K1	K1 vs related control
YCR065W	YCR065W ... HCM1 transcription initiation from specific RNA polymerase II transcrinucleus | YCR066W	K1	K1 vs related control
YCR071C	YCR071C ... IMG2 protein biosynthesis structural constituent of ribosome mitochondrial large ribosomal subun | YCR072C	Y2189	Y2189 vs related control
YCR073W-A	YCR073W-A ... SOL2 tRNA-nucleus export* molecular function unknown* cytoplasm* | YCR075C	Y2189	Y2189 vs related control
YCR088W	YCR088W ... ABP1 establishment of cell polarity protein binding cytoplasm* | YCR089W	Y2189	Y2189 vs related control
YCR088W	YCR088W ... ABP1 establishment of cell polarity protein binding cytoplasm* | YCR089W	K1	K1 vs related control
YHL002W	YHL002W ... HSE1 protein-vacuolar targeting protein binding endosome | YHL003C	NCYC110	NCYC110 vs related control
YHL004W	YHL004W ... MRP4 protein biosynthesis structural constituent of ribosome*mitochondrial small ribosomal subun | YHL005C	NCYC110	NCYC110 vs related control
YHL008C	YHL008C ... YHL008C biological process unknown transporter activity vacuole (sensu Fungi) | YHL009C	NCYC110	NCYC110 vs related control
YHL009C	YHL009C ... YAP3 regulation of transcription fr transcription factor activity nucleus | YHL010C	NCYC110	NCYC110 vs related control
YHL014C	YHL014C ... YLF2 biological process unknown molecular function unknown mitochondrion | YHL015W	NCYC110	NCYC110 vs related control
YHL019C	YHL019C ... APM2 vesicle-mediated transport clathrin binding AP-1 adaptor complex | YHL019W-A	NCYC110	NCYC110 vs related control
YHL020C	YHL020C ... OPI1 positive regulation of transcr transcription corepressor activity nucleus | YHL021C	NCYC110	NCYC110 vs related control
YHL031C	YHL031C ... GOS1 vesicle fusion* v-SNARE activity integral to membrane | YHL032C	NCYC110	NCYC110 vs related control
YHL033C	YHL033C RP cluster RPL8A protein biosynthesis structural constituent of ribosome cytosolic large ribosomal subunit ( | YHL034C	NCYC110	NCYC110 vs related control
YHL050C	YHL050C ... YHL050C biological process unknown helicase activity cellular component unknown | YHL050W-A	NCYC110	NCYC110 vs related control
YHR001W-A	YHR001W-A ... QCR10 aerobic respiration* ubiquinol-cytochrome-c reductase acmitochondrion* | YHR002W	NCYC110	NCYC110 vs related control
YHR008C	YHR008C ... SOD2 replicative cell aging* manganese superoxide dismutase actimitochondrion* | YHR009C	NCYC110	NCYC110 vs related control
YHR011W	YHR011W ... DIA4 aerobic respiration* serine-tRNA ligase activity cytoplasm* | YHR012W	NCYC110	NCYC110 vs related control
YHR013C	YHR013C PAC cluster ARD1 protein amino acid acetylation peptide alpha-N-acetyltransferase acytoplasm* | YHR014W	NCYC110	NCYC110 vs related control
YHR024C	YHR024C ... MAS2 mitochondrial protein processi mitochondrial processing peptidase mitochondrial processing peptidase | YHR025W	NCYC110	NCYC110 vs related control
YHR032W	YHR032W ... YHR032W biological process unknown molecular function unknown cellular component unknown | YHR032W-A	NCYC110	NCYC110 vs related control
YHR036W	YHR036W ˜ BRL1 biological process unknown molecular function unknown | Essential nuclear envelope integral membrane protein identified as a suppressor of a conditional mutation in the major karyopherin, CRM1; homologous to and interacts with Brr6p, a nuclear envelope protein involved in nuclear exportYHR037W	NCYC110	NCYC110 vs related control
YHR038W	YHR038W ... RRF1 protein biosynthesis translation termination factor actimitochondrion | YHR039C	NCYC110	NCYC110 vs related control
YHR040W	YHR040W ... BCD1 snoRNA metabolism nucleic acid binding cytoplasm* | YHR041C	NCYC110	NCYC110 vs related control
YHR041C	YHR041C ... SRB2 transcription from RNA polymer RNA polymerase II transcription medmediator complex | YHR042W	NCYC110	NCYC110 vs related control
YHR047C	YHR047C ˜ AAP1 proteolysis and peptidolysis* aminopeptidase activity cytoplasm* | Arginine/alanine aminopeptidase, overproduction stimulates glycogen accumulationYHR048W	NCYC110	NCYC110 vs related control
YHR051W	YHR051W ... COX6 aerobic respiration* cytochrome-c oxidase activity respiratory chain complex IV (sensu | YHR052W	NCYC110	NCYC110 vs related control
YHR054C	YHR054C ... YHR054C biological process unknown molecular function unknown cellular component unknown | YHR054W-A	NCYC110	NCYC110 vs related control
YHR077C	YHR077C ... NMD2 mRNA catabolism* protein binding cytoplasm* | YHR078W	NCYC110	NCYC110 vs related control
YHR080C	YHR080C ... YHR080C biological process unknown molecular function unknown mitochondrion | YHR081W	NCYC110	NCYC110 vs related control
YHR089C	YHR089C PAC cluster GAR1 rRNA modification* RNA binding nucleolus* | YHR090C	NCYC110	NCYC110 vs related control
YHR090C	YHR090C ... YNG2 chromatin modification enzyme activator activity nucleus* | YHR091C	NCYC110	NCYC110 vs related control
YHR091C	YHR091C ... MSR1 protein biosynthesis* arginine-tRNA ligase activity mitochondrion | YHR092C	NCYC110	NCYC110 vs related control
YHR092C	YHR092C ... HXT4 hexose transport glucose transporter activity* plasma membrane | YHR093W	NCYC110	NCYC110 vs related control
YHR105W	YHR105W ... YPT35 biological process unknown molecular function unknown endosome | YHR106W	NCYC110	NCYC110 vs related control
YHR109W	YHR109W ... CTM1 protein modification [cytochrome c]-lysine N-methyltranscytosol | YHR110W	NCYC110	NCYC110 vs related control
YHR110W	YHR110W ... ERP5 secretory pathway molecular function unknown integral to membrane | YHR111W	NCYC110	NCYC110 vs related control
YHR115C	YHR115C ... DMA1 mitotic spindle checkpoint* molecular function unknown cytoplasm | YHR116W	NCYC110	NCYC110 vs related control
YHR116W	YHR116W ... COX23 aerobic respiration molecular function unknown cytoplasm* | YHR117W	NCYC110	NCYC110 vs related control
YHR117W	YHR117W ... TOM71 biological process unknown protein transporter activity mitochondrial outer membrane | YHR118C	NCYC110	NCYC110 vs related control
YHR120W	YHR120W ... MSH1 DNA repair ATP binding mitochondrion | YHR121W	NCYC110	NCYC110 vs related control
YHR127W	YHR127W ... YHR127W biological process unknown molecular function unknown nucleus | YHR128W	NCYC110	NCYC110 vs related control
YHR134W	YHR134W ... WSS1 protein sumoylation molecular function unknown cellular component unknown | YHR135C	NCYC110	NCYC110 vs related control
YHR153C	YHR153C ... SPO16 sporulation (sensu Fungi) molecular function unknown cellular component unknown | YHR154W	NCYC110	NCYC110 vs related control
YHR154W	YHR154W ... RTT107 negative regulation of DNA tra molecular function unknown nucleus | YHR155W	NCYC110	NCYC110 vs related control
YHR159W	YHR159W ... YHR159W biological process unknown molecular function unknown cytoplasm | YHR160C	NCYC110	NCYC110 vs related control
YHR163W	YHR163W ... SOL3 tRNA processing* 6-phosphogluconolactonase activity cytoplasm* | YHR164C	NCYC110	NCYC110 vs related control
YHR168W	YHR168W ... MTG2 protein biosynthesis GTPase activity* mitochondrial inner membrane* | YHR169W	NCYC110	NCYC110 vs related control
YHR189W	YHR189W ... PTH1 protein biosynthesis aminoacyl-tRNA hydrolase activity mitochondrion | YHR190W	NCYC110	NCYC110 vs related control
YHR194W	YHR194W ... MDM31 mitochondrion organization and molecular function unknown nucleus* | YHR195W	NCYC110	NCYC110 vs related control
YHR198C	YHR198C ˜ AIM18 biological process unknown molecular function unknown mitochondrion | Putative protein of unknown function; the authentic, non-tagged protein is detected in highly purified mitochondria in high-throughput studies; null mutant displays elevated frequency of mitochondrial genome lossYHR199C	NCYC110	NCYC110 vs related control
YHR201C	YHR201C ... PPX1 polyphosphate metabolism exopolyphosphatase activity cytoplasm | YHR202W	NCYC110	NCYC110 vs related control
YHR202W	YHR202W ... YHR202W biological process unknown molecular function unknown vacuole (sensu Fungi)* | YHR203C	NCYC110	NCYC110 vs related control
YHR203C	YHR203C RP cluster RPS4B protein biosynthesis structural constituent of ribosome cytosolic small ribosomal subunit ( | YHR204W	NCYC110	NCYC110 vs related control
YHR219W	YHR219W ... YHR219W biological process unknown molecular function unknown cellular component unknown | YIL001W	NCYC110	NCYC110 vs related control
YIL006W	YIL006W ˜ YIA6 transport* transporter activity* | Mitochondrial NAD+ transporter, involved in the transport of NAD+ into the mitochondria (see also YEA6); member of the mitochondrial carrier subfamily; disputed role as a pyruvate transporter; has putative mouse and human orthologsYIL007C	Y2189	Y2189 vs related control
YIL019W	YIL019W PAC cluster FAF1 processing of 20S pre-rRNA molecular function unknown cytoplasm* | YIL020C	Y2189	Y2189 vs related control
YIL021W	YIL021W PAC cluster RPB3 transcription from RNA polymer DNA-directed RNA polymerase activit"DNA-directed RNA polymerase II, cor" | YIL022W	Y2189	Y2189 vs related control
YIL022W	YIL022W ... TIM44 mitochondrial matrix protein i protein transporter activity mitochondrial matrix* | YIL023C	Y2189	Y2189 vs related control
YIL038C	YIL038C ... NOT3 regulation of transcription fr 3'-5'-exoribonuclease activity cytoplasm* | YIL039W	Y2189	Y2189 vs related control
YIL047C	YIL047C ... SYG1 signal transduction molecular function unknown mitochondrion* | YIL047C-A	K9	K9 vs related control
YIL047C	YIL047C ... SYG1 signal transduction molecular function unknown mitochondrion* | YIL047C-A	Y2189	Y2189 vs related control
YIL050W	YIL050W ... PCL7 regulation of glycogen biosynt cyclin-dependent protein kinase regcyclin-dependent protein kinase hol | YIL051C	K9	K9 vs related control
YIL061C	YIL061C ... SNP1 nuclear mRNA splicing, via spl mRNA binding commitment complex* | YIL062C	Y2189	Y2189 vs related control
YIL064W	YIL064W ˜ SEE1 biological process unknown S-adenosylmethionine-dependent | Protein with a role in intracellular transport; has sequence similarity to S-adenosylmethionine-dependent methyltransferases of the seven beta-strand familyYIL065C	Y2189	Y2189 vs related control
YIL065C	YIL065C ... FIS1 mitochondrial fission molecular function unknown mitochondrial outer membrane | YIL066C	Y2189	Y2189 vs related control
YIL070C	YIL070C ... MAM33 aerobic respiration molecular function unknown mitochondrial matrix | YIL071C	K9	K9 vs related control
YIL070C	YIL070C ... MAM33 aerobic respiration molecular function unknown mitochondrial matrix | YIL071C	Y2189	Y2189 vs related control
YIL073C	YIL073C ... SPO22 meiosis molecular function unknown cellular component unknown | YIL074C	K9	K9 vs related control
YIL087C	YIL087C ˜ AIM19 biological process unknown molecular function unknown | Putative protein of unknown function; the authentic, non-tagged protein is detected in purified mitochondria in high-throughput studies; null mutant displays reduced respiratory growthYIL088C	K9	K9 vs related control
YIL093C	YIL093C ... RSM25 protein biosynthesis structural constituent of ribosome mitochondrial small ribosomal subun | YIL094C	Y2189	Y2189 vs related control
YIL098C	YIL098C ... FMC1 protein complex assembly molecular function unknown mitochondrion | YIL099W	Y2189	Y2189 vs related control
YIL106W	YIL106W ... MOB1 protein amino acid phosphoryla kinase regulator activity bud neck* | YIL107C	K9	K9 vs related control
YIL113W	YIL113W iESR cluster SDP1 MAPKKK cascade during cell wal MAP kinase phosphatase activity cytoplasm* | YIL114C	Y2189	Y2189 vs related control
YIL123W	YIL123W ... SIM1 microtubule cytoskeleton organ molecular function unknown cell wall (sensu Fungi) | YIL124W	Y2189	Y2189 vs related control
YIL125W	YIL125W ... KGD1 tricarboxylic acid cycle* oxoglutarate dehydrogenase (succinymitochondrial matrix* | YIL126W	Y2189	Y2189 vs related control
YIL133C	YIL133C RP cluster RPL16A protein biosynthesis structural constituent of ribosome*cytosolic large ribosomal subunit ( | YIL134C-A	K9	K9 vs related control
YIL136W	YIL136W iESR cluster OM45 biological process unknown molecular function unknown mitochondrial outer membrane | YIL137C	Y2189	Y2189 vs related control
YIL142W	YIL142W ... CCT2 protein folding* unfolded protein binding cytoplasm* | YIL143C	Y2189	Y2189 vs related control
YIL154C	YIL154C ... IMP2' DNA repair* transcription coactivator activity cytoplasm | YIL155C	K9	K9 vs related control
YIL154C	YIL154C ... IMP2' DNA repair* transcription coactivator activity cytoplasm | YIL155C	Y2189	Y2189 vs related control
YIL155C	YIL155C ... GUT2 carbohydrate metabolism* glycerol-3-phosphate dehydrogenase mitochondrion | YIL156W	Y2189	Y2189 vs related control
YIL156W-B	YIL156W-B | YIL157C	Y2189	Y2189 vs related control
YIL157C	YIL157C ˜ COA1 biological process unknown molecular function unknown mitochondrion | Mitochondrial inner membrane protein required for assembly of the cytochrome c oxidase complex (complex IV); interacts with complex IV assembly factor Shy1p during the early stages of assemblyYIL158W	K9	K9 vs related control
YIL157C	YIL157C ˜ COA1 biological process unknown molecular function unknown mitochondrion | Mitochondrial inner membrane protein required for assembly of the cytochrome c oxidase complex (complex IV); interacts with complex IV assembly factor Shy1p during the early stages of assemblyYIL158W	Y2189	Y2189 vs related control
YIL166C	YIL166C ... YIL166C transport transporter activity membrane | YIL169C	K9	K9 vs related control
YIL169C	YIL169C ... YIL169C biological process unknown molecular function unknown cellular component unknown | YIL171W-A	K9	K9 vs related control
YIL177C	YIL177C ... YIL177C biological process unknown helicase activity cellular component unknown | YIL177W-A	Y2189	Y2189 vs related control
YIR003W	YIR003W ˜ AIM21 biological process unknown molecular function unknown | Protein of unknown function; may interact with ribosomes; GFP-fusion protein colocalizes with Sac1p to the actin cytoskeleton; YIR003W is not an essential gene; null mutant displays elevated frequency of mitochondrial genome lossYIR004W	Y2189	Y2189 vs related control
YIR010W	YIR010W ... DSN1 chromosome segregation molecular function unknown kinetochore* | YIR011C	Y2189	Y2189 vs related control
YIR014W	YIR014W ... YIR014W biological process unknown molecular function unknown vacuole (sensu Fungi) | YIR015W	K9	K9 vs related control
YIR014W	YIR014W ... YIR014W biological process unknown molecular function unknown vacuole (sensu Fungi) | YIR015W	Y2189	Y2189 vs related control
YIR015W	YIR015W ... RPR2 tRNA processing ribonuclease P activity nucleolar ribonuclease P complex | YIR016W	Y2189	Y2189 vs related control
YIR027C	YIR027C ... DAL1 allantoin catabolism allantoinase activity intracellular | YIR028W	Y2189	Y2189 vs related control
YIR035C	YIR035C ... YIR035C biological process unknown molecular function unknown cytoplasm | YIR036C	K9	K9 vs related control
YIR035C	YIR035C ... YIR035C biological process unknown molecular function unknown cytoplasm | YIR036C	Y2189	Y2189 vs related control
YJL003W	YJL003W ... COX16 aerobic respiration* molecular function unknown mitochondrial inner membrane | YJL004C	K9	K9 vs related control
YJL012C	YJL012C ... VTC4 vacuole fusion, non-autophagic molecular function unknown intrinsic to vacuolar membrane | YJL013C	K9	K9 vs related control
YJL020C	YJL020C ... BBC1 actin cytoskeleton organizatio myosin I binding actin cortical patch | YJL022W	K9	K9 vs related control
YJL052W	YJL052W ... TDH1 glycolysis* glyceraldehyde-3-phosphate dehydrogcytosol* | YJL053W	K9	K9 vs related control
YJL060W	YJL060W ... BNA3 NAD biosynthesis arylformamidase activity cytoplasm* | YJL061W	K9	K9 vs related control
YJL063C	YJL063C ... MRPL8 protein biosynthesis* structural constituent of ribosome mitochondrial large ribosomal subun | YJL064W	K9	K9 vs related control
YJL096W	YJL096W ... MRPL49 protein biosynthesis structural constituent of ribosome mitochondrial large ribosomal subun | YJL097W	K9	K9 vs related control
YJL102W	YJL102W ... MEF2 translational elongation translation elongation factor activmitochondrion | YJL103C	K9	K9 vs related control
YJL103C	YJL103C ˜ iESR cluster GSM1 oxidative phosphorylation molecular function unknown | Putative zinc cluster protein of unknown function; proposed to be involved in the regulation of energy metabolism, based on patterns of expression and sequence analysisYJL104W	K9	K9 vs related control
YJL106W	YJL106W ... IME2 protein amino acid phosphoryla protein kinase activity nucleus | YJL107C	K9	K9 vs related control
YJL123C	YJL123C ˜ MTC1 biological process unknown molecular function unknown | Protein of unknown function that may interact with ribosomes; green fluorescent protein (GFP)-fusion protein localizes to the cytoplasm and to COPI-coated vesicles (early Golgi); mtc1 is synthetically lethal with cdc13-1YJL124C	K9	K9 vs related control
YJL133C-A	YJL133C-A ... YJL133C-A biological process unknown molecular function unknown cellular component unknown | YJL133W	K9	K9 vs related control
YJL143W	YJL143W ... TIM17 mitochondrial matrix protein i protein transporter activity mitochondrial inner membrane preseq | YJL144W	K9	K9 vs related control
YJL157C	YJL157C ... FAR1 signal transduction during con cyclin-dependent protein kinase inhcytoplasm* | YJL158C	K9	K9 vs related control
YJL166W	YJL166W ... QCR8 aerobic respiration* ubiquinol-cytochrome-c reductase acrespiratory chain complex III (sens | YJL167W	K9	K9 vs related control
YJL179W	YJL179W ... PFD1 protein folding* unfolded protein binding prefoldin complex | YJL180C	K9	K9 vs related control
YJL192C	YJL192C ... SOP4 ER to Golgi transport molecular function unknown endoplasmic reticulum* | YJL193W	K9	K9 vs related control
YJL199C	YJL199C ˜ MBB1 | Dubious open reading frame, unlikely to encode a protein; not conserved in closely related Saccharomyces species; protein detected in large-scale protein-protein interaction studiesYJL200C	K9	K9 vs related control
YJR015W	YJR015W ... YJR015W biological process unknown molecular function unknown cytoplasm* | YJR016C	K9	K9 vs related control
YJR019C	YJR019C ... TES1 fatty acid oxidation acyl-CoA thioesterase activity mitochondrion* | YJR020W	K9	K9 vs related control
YJR025C	YJR025C iESR cluster BNA1 NAD biosynthesis "3-hydroxyanthranilate 3,4-dioxygena"cytoplasm | YJR030C	K9	K9 vs related control
YJR045C	YJR045C ... SSC1 protein folding* ATPase activity* mitochondrion* | YJR046W	K9	K9 vs related control
YJR048W	YJR048W ... CYC1 electron transport electron carrier activity mitochondrial intermembrane space | YJR049C	K9	K9 vs related control
YJR057W	YJR057W ... CDC8 DNA repair* thymidylate kinase activity* cytoplasm* | YJR058C	K9	K9 vs related control
YJR060W	YJR060W ... CBF1 chromatin assembly or disassem DNA binding* nucleus* | YJR061W	K9	K9 vs related control
YJR061W	YJR061W ... YJR061W biological process unknown molecular function unknown cellular component unknown | YJR062C	K9	K9 vs related control
YJR067C	YJR067C ... YAE1 biological process unknown molecular function unknown cytoplasm* | YJR068W	K9	K9 vs related control
YJR077C	YJR077C ... MIR1 phosphate transport inorganic phosphate transporter actmitochondrion* | YJR078W	K9	K9 vs related control
YJR085C	YJR085C ... YJR085C biological process unknown molecular function unknown mitochondrion | YJR086W	K9	K9 vs related control
YJR087W	YJR087W ... | YJR088C	K9	K9 vs related control
YJR101W	YJR101W ... RSM26 protein biosynthesis structural constituent of ribosome mitochondrial small ribosomal subun | YJR102C	K9	K9 vs related control
YJR102C	YJR102C ... VPS25 protein-vacuolar targeting* molecular function unknown ESCRT II complex | YJR103W	K9	K9 vs related control
YJR103W	YJR103W ... URA8 phospholipid biosynthesis* CTP synthase activity cytosol | YJR104C	K9	K9 vs related control
YJR120W	YJR120W ... YJR120W mitochondrion organization and molecular function unknown cellular component unknown | YJR121W	K9	K9 vs related control
YJR121W	YJR121W ... ATP2 ATP synthesis coupled proton t hydrogen-transporting ATP synthase soluble fraction* | YJR122W	K9	K9 vs related control
YJR147W	YJR147W ... HMS2 pseudohyphal growth molecular function unknown cytoplasm* | YJR148W	K9	K9 vs related control
YJR149W	YJR149W ... YJR149W biological process unknown molecular function unknown cytoplasm | YJR150C	K9	K9 vs related control
YJR151C	YJR151C ... DAN4 biological process unknown molecular function unknown cell wall (sensu Fungi) | YJR151W-A	K9	K9 vs related control
YKL003C	YKL003C ... MRP17 protein biosynthesis structural constituent of ribosome mitochondrial small ribosomal subun | YKL004W	Y2189	Y2189 vs related control
YKL019W	YKL019W ... RAM2 peptide pheromone maturation* protein farnesyltransferase activitCAAX-protein geranylgeranyltransfer | YKL020C	Y2189	Y2189 vs related control
YKL023W	YKL023W ... YKL023W biological process unknown molecular function unknown cytoplasm | YKL024C	Y2189	Y2189 vs related control
YKL032C	YKL032C ... IXR1 DNA repair DNA binding nuclear chromosome | YKL033W	Y2189	Y2189 vs related control
YKL033W-A	YKL033W-A ... YKL033W-A biological process unknown molecular function unknown cellular component unknown | YKL034W	Y2189	Y2189 vs related control
YKL035W	YKL035W iESR cluster UGP1 protein amino acid glycosylati UTP-glucose-1-phosphate uridylyltracytoplasm | YKL036C	Y2189	Y2189 vs related control
YKL041W	YKL041W ... VPS24 late endosome to vacuole trans molecular function unknown cytoplasm* | YKL042W	Y2189	Y2189 vs related control
YKL042W	YKL042W ... SPC42 microtubule nucleation* structural constituent of cytoskelecentral plaque of spindle pole body | YKL043W	Y2189	Y2189 vs related control
YKL052C	YKL052C ... ASK1 mitotic spindle organization a structural constituent of cytoskelecondensed nuclear chromosome kineto | YKL053C-A	Y2189	Y2189 vs related control
YKL053C-A	YKL053C-A ... MDM35 mitochondrion organization and molecular function unknown cytoplasm* | YKL053W	Y2189	Y2189 vs related control
YKL054C	YKL054C ... DEF1 ubiquitin-dependent protein ca molecular function unknown nucleus | YKL055C	Y2189	Y2189 vs related control
YKL059C	YKL059C ... MPE1 mRNA polyadenylylation* RNA binding mRNA cleavage and polyadenylation s | YKL060C	Y2189	Y2189 vs related control
YKL064W	YKL064W ... MNR2 magnesium ion transport magnesium ion transporter activity membrane | YKL065C	Y2189	Y2189 vs related control
YKL068W-A	YKL068W-A ... YKL068W-A biological process unknown molecular function unknown cellular component unknown | YKL069W	Y2189	Y2189 vs related control
YKL069W	YKL069W ... YKL069W biological process unknown molecular function unknown cytoplasm* | YKL070W	Y2189	Y2189 vs related control
YKL082C	YKL082C PAC cluster RRP14 establishment of cell polarity molecular function unknown nucleolus | YKL083W	Y2189	Y2189 vs related control
YKL085W	YKL085W ... MDH1 tricarboxylic acid cycle* L-malate dehydrogenase activity mitochondrial matrix | YKL086W	Y2189	Y2189 vs related control
YKL087C	YKL087C ... CYT2 cytochrome c-heme linkage holocytochrome-c synthase activity mitochondrial intermembrane space | YKL088W	Y2189	Y2189 vs related control
YKL088W	YKL088W ˜ CAB3 response to salt stress* purine nucleotide binding* | Probable phosphopantothenoylcysteine decarboxylase (PPCDC), which catalyzes the third step of coenzyme A biosynthesis from pantothenate; null mutant lethality is complemented by E. coli coaBC; interacts with Sis2p and Vhs3pYKL089W	Y2189	Y2189 vs related control
YKL103C	YKL103C iESR cluster LAP4 vacuolar protein catabolism aminopeptidase I activity vacuole (sensu Fungi) | YKL104C	Y2189	Y2189 vs related control
YKL112W	YKL112W ... ABF1 DNA replication* DNA binding* nuclear chromatin | YKL113C	Y2189	Y2189 vs related control
YKL141W	YKL141W ... SDH3 tricarboxylic acid cycle* succinate dehydrogenase (ubiquinonerespiratory chain complex II (sensu | YKL142W	Y2189	Y2189 vs related control
YKL146W	YKL146W ... AVT3 neutral amino acid transport neutral amino acid transporter activacuole | YKL147C	Y2189	Y2189 vs related control
YKL157W	YKL157W ... APE2 peptide metabolism leucyl aminopeptidase activity cytoplasm* | YKL159C	Y2189	Y2189 vs related control
YKL160W	YKL160W ... ELF1 cell growth molecular function unknown nucleus | YKL161C	Y2189	Y2189 vs related control
YKL166C	YKL166C ... TPK3 protein amino acid phosphoryla protein serine/threonine kinase actcytoplasm* | YKL167C	Y2189	Y2189 vs related control
YKL185W	YKL185W ... ASH1 pseudohyphal growth* specific transcriptional repressor nucleus | YKL186C	Y2189	Y2189 vs related control
YKL192C	YKL192C ... ACP1 fatty acid biosynthesis acyl carrier activity mitochondrion | YKL193C	Y2189	Y2189 vs related control
YKL195W	YKL195W ... MIA40 mitochondrial intermembrane sp molecular function unknown mitochondrion* | YKL196C	Y2189	Y2189 vs related control
YKR006C	YKR006C ... MRPL13 protein biosynthesis structural constituent of ribosome mitochondrial large ribosomal subun | YKR007W	Y2189	Y2189 vs related control
YKR041W	YKR041W ... YKR041W biological process unknown molecular function unknown cytoplasm* | YKR042W	Y2189	Y2189 vs related control
YKR048C	YKR048C ... NAP1 budding cell bud growth* protein binding cytoplasm* | YKR049C	Y2189	Y2189 vs related control
YKR066C	YKR066C iESR cluster CCP1 response to oxidative stress cytochrome-c peroxidase activity mitochondrion* | YKR067W	Y2189	Y2189 vs related control
YKR072C	YKR072C ... SIS2 G1/S transition of mitotic cel phosphopantothenoylcysteine decarbocytoplasm* | YKR073C	Y2189	Y2189 vs related control
YKR085C	YKR085C ... MRPL20 protein biosynthesis* structural constituent of ribosome mitochondrial large ribosomal subun | YKR086W	Y2189	Y2189 vs related control
YLL001W	YLL001W ... DNM1 mitochondrion organization and GTPase activity mitochondrial outer membrane | YLL002W	YPS1009	YPS1009 vs related control
YLL003W	YLL003W ... SFI1 G2/M transition of mitotic cel molecular function unknown half bridge of spindle pole body | YLL004W	YPS1009	YPS1009 vs related control
YLL008W	YLL008W PAC cluster DRS1 35S primary transcript process ATP-dependent RNA helicase activitynucleolus | YLL009C	YJM428	YJM428 vs related control
YLL009C	YLL009C ... COX17 cytochrome c oxidase complex a thioredoxin peroxidase activity* cytosol* | YLL010C	YJM428	YJM428 vs related control
YLL013C	YLL013C ... PUF3 mRNA catabolism, deadenylylati mRNA binding cytoplasm | YLL014W	YJM428	YJM428 vs related control
YLL013C	YLL013C ... PUF3 mRNA catabolism, deadenylylati mRNA binding cytoplasm | YLL014W	YPS1009	YPS1009 vs related control
YLL018C	YLL018C ... DPS1 protein biosynthesis RNA binding* cytoplasm | YLL018C-A	YJM428	YJM428 vs related control
YLL018C	YLL018C ... DPS1 protein biosynthesis RNA binding* cytoplasm | YLL018C-A	YPS1009	YPS1009 vs related control
YLL018C-A	YLL018C-A ... COX19 cytochrome c oxidase complex a metal ion transporter activity cytosol* | YLL019C	YPS1009	YPS1009 vs related control
YLL019C	YLL019C iESR cluster KNS1 protein amino acid phosphoryla protein serine/threonine kinase actcellular component unknown | YLL020C	YPS1009	YPS1009 vs related control
YLL022C	YLL022C ... HIF1 chromatin silencing at telomer molecular function unknown nucleus* | YLL023C	YJM428	YJM428 vs related control
YLL022C	YLL022C ... HIF1 chromatin silencing at telomer molecular function unknown nucleus* | YLL023C	YPS1009	YPS1009 vs related control
YLL023C	YLL023C ... YLL023C biological process unknown molecular function unknown endoplasmic reticulum | YLL024C	YJM428	YJM428 vs related control
YLL033W	YLL033W ˜ IRC19 sporulation (sensu Fungi) molecular function unknown | Putative protein of unknown function; YLL033W is not an essential gene but mutant is defective in spore formation; null mutant displays increased levels of spontaneous Rad52p fociYLL034C	YJM428	YJM428 vs related control
YLL038C	YLL038C PAC cluster ENT4 endocytosis* clathrin binding actin cortical patch | YLL039C	YPS1009	YPS1009 vs related control
YLL041C	YLL041C ... SDH2 tricarboxylic acid cycle* succinate dehydrogenase (ubiquinonerespiratory chain complex II (sensu | YLL042C	YJM428	YJM428 vs related control
YLL041C	YLL041C ... SDH2 tricarboxylic acid cycle* succinate dehydrogenase (ubiquinonerespiratory chain complex II (sensu | YLL042C	YPS1009	YPS1009 vs related control
YLL044W	YLL044W RP cluster | YLL045C	YPS1009	YPS1009 vs related control
YLL045C	YLL045C RP cluster RPL8B protein biosynthesis structural constituent of ribosome cytosolic large ribosomal subunit ( | YLL046C	YJM428	YJM428 vs related control
YLL049W	YLL049W ˜ LDB18 biological process unknown molecular function unknown | Protein of unknown function; required for nuclear migration; null mutant shows a reduced affinity for the alcian blue dye suggesting a decreased net negative charge of the cell surfaceYLL050C	YPS1009	YPS1009 vs related control
YLL055W	YLL055W ˜ YCT1 biological process unknown ion transporter activity | High-affinity cysteine-specific transporter with similarity to the Dal5p family of transporters; green fluorescent protein (GFP)-fusion protein localizes to the endoplasmic reticulum; YCT1 is not an essential geneYLL056C	YJM428	YJM428 vs related control
YLL056C	YLL056C ... YLL056C biological process unknown molecular function unknown cellular component unknown | YLL057C	YPS1009	YPS1009 vs related control
YLL058W	YLL058W ... YLL058W sulfur metabolism cystathionine gamma-synthase activicellular component unknown | YLL059C	YPS1009	YPS1009 vs related control
YLR001C	YLR001C iESR cluster YLR001C biological process unknown molecular function unknown mitochondrion* | YLR002C	YPS1009	YPS1009 vs related control
YLR011W	YLR011W ... LOT6 biological process unknown FMN reductase activity cytoplasm* | YLR012C	YPS1009	YPS1009 vs related control
YLR016C	YLR016C ˜ PML1 biological process unknown molecular function unknown | Subunit of the RES complex, which is required for nuclear retention of unspliced pre-mRNAs; acts in the same pathway as Pml39p and Mlp1pYLR017W	YPS1009	YPS1009 vs related control
YLR019W	YLR019W ... PSR2 response to stress phosphoprotein phosphatase activityplasma membrane | YLR020C	YPS1009	YPS1009 vs related control
YLR027C	YLR027C ... AAT2 nitrogen compound metabolism* aspartate transaminase activity cytoplasm* | YLR028C	YJM428	YJM428 vs related control
YLR027C	YLR027C ... AAT2 nitrogen compound metabolism* aspartate transaminase activity cytoplasm* | YLR028C	YPS1009	YPS1009 vs related control
YLR032W	YLR032W ... RAD5 DNA repair ATPase activity nuclear chromatin | YLR033W	YPS1009	YPS1009 vs related control
YLR038C	YLR038C ... COX12 cytochrome c oxidase complex a cytochrome-c oxidase activity respiratory chain complex IV (sensu | YLR039C	YJM428	YJM428 vs related control
YLR043C	YLR043C ... TRX1 response to oxidative stress* thiol-disulfide exchange intermediacytosol* | YLR044C	YPS1009	YPS1009 vs related control
YLR049C	YLR049C ... YLR049C biological process unknown molecular function unknown cellular component unknown | YLR050C	YJM428	YJM428 vs related control
YLR049C	YLR049C ... YLR049C biological process unknown molecular function unknown cellular component unknown | YLR050C	YPS1009	YPS1009 vs related control
YLR055C	YLR055C ... SPT8 histone acetylation* transcription cofactor activity nucleus* | YLR056W	YJM428	YJM428 vs related control
YLR055C	YLR055C ... SPT8 histone acetylation* transcription cofactor activity nucleus* | YLR056W	YPS1009	YPS1009 vs related control
YLR058C	YLR058C ... SHM2 one-carbon compound metabolism glycine hydroxymethyltransferase accytoplasm | YLR059C	YPS1009	YPS1009 vs related control
YLR059C	YLR059C ... REX2 RNA processing 3'-5' exonuclease activity mitochondrion | YLR060W	YJM428	YJM428 vs related control
YLR069C	YLR069C ... MEF1 translational elongation translation elongation factor activmitochondrion | YLR070C	YPS1009	YPS1009 vs related control
YLR072W	YLR072W ... YLR072W biological process unknown molecular function unknown cytoplasm | YLR073C	YPS1009	YPS1009 vs related control
YLR073C	YLR073C ˜ PAC cluster RFU1 biological process unknown molecular function unknown | Protein that inhibits Doa4p deubiquitinating activity; contributes to ubiquitin homeostasis by regulating the conversion of free ubiquitin chains to ubiquitin monomers by Doa4p; GFP-fusion protein localizes to endosomesYLR074C	YPS1009	YPS1009 vs related control
YLR079W	YLR079W ... SIC1 G1/S transition of mitotic cel protein binding* cytoplasm* | YLR080W	YPS1009	YPS1009 vs related control
YLR090W	YLR090W ... XDJ1 biological process unknown chaperone regulator activity nucleus* | YLR091W	YJM428	YJM428 vs related control
YLR090W	YLR090W ... XDJ1 biological process unknown chaperone regulator activity nucleus* | YLR091W	YPS1009	YPS1009 vs related control
YLR091W	YLR091W ˜ GEP5 biological process unknown molecular function unknown | Protein of unknown function; detected in highly purified mitochondria in high-throughput studies; null mutant has decreased levels of cardiolipin and phosphatidylethanolamine; not an esssential geneYLR092W	YJM428	YJM428 vs related control
YLR091W	YLR091W ˜ GEP5 biological process unknown molecular function unknown | Protein of unknown function; detected in highly purified mitochondria in high-throughput studies; null mutant has decreased levels of cardiolipin and phosphatidylethanolamine; not an esssential geneYLR092W	YPS1009	YPS1009 vs related control
YLR094C	YLR094C ... GIS3 intracellular signaling cascad molecular function unknown cytoplasm* | YLR095C	YJM428	YJM428 vs related control
YLR094C	YLR094C ... GIS3 intracellular signaling cascad molecular function unknown cytoplasm* | YLR095C	YPS1009	YPS1009 vs related control
YLR099C	YLR099C ... ICT1 biological process unknown molecular function unknown cellular component unknown | YLR099W-A	YPS1009	YPS1009 vs related control
YLR099W-A	YLR099W-A ... YLR099W-A biological process unknown molecular function unknown cellular component unknown | YLR100W	YPS1009	YPS1009 vs related control
YLR102C	YLR102C ... APC9 mitotic sister chromatid segre protein binding* anaphase-promoting complex | YLR103C	YPS1009	YPS1009 vs related control
YLR108C	YLR108C ... YLR108C biological process unknown molecular function unknown nucleus | YLR109W	YJM428	YJM428 vs related control
YLR108C	YLR108C ... YLR108C biological process unknown molecular function unknown nucleus | YLR109W	YPS1009	YPS1009 vs related control
YLR109W	YLR109W ... AHP1 regulation of cell redox homeo thioredoxin peroxidase activity cytoplasm | YLR110C	YPS1009	YPS1009 vs related control
YLR112W	YLR112W ... | YLR113W	YJM428	YJM428 vs related control
YLR112W	YLR112W ... | YLR113W	YPS1009	YPS1009 vs related control
YLR114C	YLR114C ... AVL9 biological process unknown molecular function unknown cytoplasm | YLR115W	YJM428	YJM428 vs related control
YLR114C	YLR114C ... AVL9 biological process unknown molecular function unknown cytoplasm | YLR115W	YPS1009	YPS1009 vs related control
YLR125W	YLR125W ... YLR125W biological process unknown molecular function unknown cellular component unknown | YLR126C	YJM428	YJM428 vs related control
YLR126C	YLR126C ... YLR126C biological process unknown molecular function unknown cytoplasm | YLR127C	YJM428	YJM428 vs related control
YLR126C	YLR126C ... YLR126C biological process unknown molecular function unknown cytoplasm | YLR127C	YPS1009	YPS1009 vs related control
YLR146W-A	YLR146W-A YLR146W-A YPR145C-A	YJM428	YJM428 vs related control
YLR152C	YLR152C iESR cluster YLR152C biological process unknown molecular function unknown cellular component unknown | YLR153C	YPS1009	YPS1009 vs related control
YLR154C-G	YLR154C-G ... YLR154C-G biological process unknown molecular function unknown cellular component unknown | YLR154C-H	YPS1009	YPS1009 vs related control
YLR154W-B	YLR154W-B ˜ Dubious Dubious open reading frame unlikely to encode a protein; encoded within the the 25S rRNA gene on the opposite strandYLR154W-E	YPS1009	YPS1009 vs related control
YLR154W-C	YLR154W-C ... TAR1 biological process unknown molecular function unknown mitochondrion | YLR155C	YPS1009	YPS1009 vs related control
YLR163C	YLR163C ... MAS1 mitochondrial protein processi mitochondrial processing peptidase mitochondrial processing peptidase | YLR164W	YJM428	YJM428 vs related control
YLR163C	YLR163C ... MAS1 mitochondrial protein processi mitochondrial processing peptidase mitochondrial processing peptidase | YLR164W	YPS1009	YPS1009 vs related control
YLR168C	YLR168C ˜ UPS2 biological process unknown molecular function unknown | Mitochondrial intermembrane space protein involved in regulation of mitochondrial cardiolipin and phosphatidylethanolamine levels; null has defects in mitochondrial morphology; similar to Ups1p, Ups3p and to human PRELIYLR169W	YPS1009	YPS1009 vs related control
YLR179C	YLR179C ... YLR179C biological process unknown molecular function unknown cytoplasm* | YLR180W	YJM428	YJM428 vs related control
YLR179C	YLR179C ... YLR179C biological process unknown molecular function unknown cytoplasm* | YLR180W	YPS1009	YPS1009 vs related control
YLR180W	YLR180W ... SAM1 methionine metabolism methionine adenosyltransferase acticytoplasm | YLR181C	YJM428	YJM428 vs related control
YLR183C	YLR183C PAC cluster TOS4 G1/S-specific transcription in transcription factor activity cytoplasm* | YLR184W	YJM428	YJM428 vs related control
YLR183C	YLR183C PAC cluster TOS4 G1/S-specific transcription in transcription factor activity cytoplasm* | YLR184W	YPS1009	YPS1009 vs related control
YLR189C	YLR189C ... ATG26 sterol metabolism sterol 3-beta-glucosyltransferase acytoplasm | YLR190W	YPS1009	YPS1009 vs related control
YLR193C	YLR193C ˜ UPS1 biological process unknown molecular function unknown | Mitochondrial intermembrane space protein that regulates mitochondrial cardiolipin levels, null has defects in Mgm1p processing, integrity of mitochondrial inner membrane complexes, and mitochondrial morphology; ortholog of human PRELIYLR194C	YJM428	YJM428 vs related control
YLR197W	YLR197W ˜ PAC cluster NOP56 (SIK1) RNA catabolism exoribonuclease II activity mitochondrion* | Essential evolutionarily-conserved nucleolar protein component of the box C/D snoRNP complexes that direct 2'-O-methylation of pre-rRNA during its maturation; overexpression causes spindle orientation defectsYLR198C	YJM428	YJM428 vs related control
YLR201C	YLR201C ˜ COQ9 biological process unknown molecular function unknown mitochondrion | Protein required for ubiquinone (coenzyme Q) biosynthesis and respiratory growth; localizes to the matrix face of the mitochondrial inner membrane in a large complex with ubiquinone biosynthetic enzymesYLR202C	YJM428	YJM428 vs related control
YLR201C	YLR201C ˜ COQ9 biological process unknown molecular function unknown mitochondrion | Protein required for ubiquinone (coenzyme Q) biosynthesis and respiratory growth; localizes to the matrix face of the mitochondrial inner membrane in a large complex with ubiquinone biosynthetic enzymesYLR202C	YPS1009	YPS1009 vs related control
YLR204W	YLR204W ... QRI5 biological process unknown molecular function unknown mitochondrion | YLR205C	YJM428	YJM428 vs related control
YLR204W	YLR204W ... QRI5 biological process unknown molecular function unknown mitochondrion | YLR205C	YPS1009	YPS1009 vs related control
YLR205C	YLR205C ... HMX1 iron ion homeostasis* heme binding* endoplasmic reticulum* | YLR206W	YJM428	YJM428 vs related control
YLR205C	YLR205C ... HMX1 iron ion homeostasis* heme binding* endoplasmic reticulum* | YLR206W	YPS1009	YPS1009 vs related control
YLR213C	YLR213C ... CRR1 biological process unknown molecular function unknown cellular component unknown | YLR214W	YJM428	YJM428 vs related control
YLR218C	YLR218C ... YLR218C biological process unknown molecular function unknown cytoplasm* | YLR219W	YJM428	YJM428 vs related control
YLR219W	YLR219W ... MSC3 meiotic recombination molecular function unknown cellular component unknown | YLR220W	YPS1009	YPS1009 vs related control
YLR239C	YLR239C ... LIP2 protein-lipoylation ligase activity mitochondrion | YLR240W	YPS1009	YPS1009 vs related control
YLR246W	YLR246W ... ERF2 protein-membrane targeting* protein-cysteine S-palmitoleyltransintegral to endoplasmic reticulum m | YLR247C	YPS1009	YPS1009 vs related control
YLR253W	YLR253W ... YLR253W biological process unknown molecular function unknown mitochondrion | YLR254C	YJM428	YJM428 vs related control
YLR253W	YLR253W ... YLR253W biological process unknown molecular function unknown mitochondrion | YLR254C	YPS1009	YPS1009 vs related control
YLR262C	YLR262C ... YPT6 intracellular protein transpor GTPase activity Golgi apparatus | YLR262C-A	YPS1009	YPS1009 vs related control
YLR264W	YLR264W RP cluster RPS28B protein biosynthesis structural constituent of ribosome cytosolic small ribosomal subunit ( | YLR265C	YJM428	YJM428 vs related control
YLR264W	YLR264W RP cluster RPS28B protein biosynthesis structural constituent of ribosome cytosolic small ribosomal subunit ( | YLR265C	YPS1009	YPS1009 vs related control
YLR270W	YLR270W iESR cluster DCS1 deadenylylation-dependent deca "hydrolase activity, acting on acid"cytoplasm* | YLR271W	YPS1009	YPS1009 vs related control
YLR277C	YLR277C ... YSH1 mRNA polyadenylylation* RNA binding mRNA cleavage and polyadenylation s | YLR278C	YPS1009	YPS1009 vs related control
YLR283W	YLR283W ... YLR283W biological process unknown molecular function unknown mitochondrion | YLR284C	YPS1009	YPS1009 vs related control
YLR284C	YLR284C ... ECI1 fatty acid beta-oxidation dodecenoyl-CoA delta-isomerase actiperoxisome | YLR285C-A	YPS1009	YPS1009 vs related control
YLR289W	YLR289W ... GUF1 biological process unknown GTPase activity mitochondrion | YLR290C	YJM428	YJM428 vs related control
YLR292C	YLR292C ... SEC72 posttranslational protein-memb protein transporter activity endoplasmic reticulum membrane* | YLR293C	YJM428	YJM428 vs related control
YLR292C	YLR292C ... SEC72 posttranslational protein-memb protein transporter activity endoplasmic reticulum membrane* | YLR293C	YPS1009	YPS1009 vs related control
YLR294C	YLR294C ˜ dubious orfYLR299C-A	YJM428	YJM428 vs related control
YLR294C	YLR294C ˜ dubious orfYLR299C-A	YPS1009	YPS1009 vs related control
YLR295C	YLR295C ... ATP14 ATP synthesis coupled proton t hydrogen-transporting ATP synthase proton-transporting ATP synthase co | YLR296W	YPS1009	YPS1009 vs related control
YLR300W	YLR300W ... EXG1 cell wall organization and bio "glucan 1,3-beta-glucosidase activit"cell wall (sensu Fungi) | YLR301W	YJM428	YJM428 vs related control
YLR300W	YLR300W ... EXG1 cell wall organization and bio "glucan 1,3-beta-glucosidase activit"cell wall (sensu Fungi) | YLR301W	YPS1009	YPS1009 vs related control
YLR312W-A	YLR312W-A ... MRPL15 protein biosynthesis structural constituent of ribosome mitochondrial large ribosomal subun | YLR313C	YJM428	YJM428 vs related control
YLR315W	YLR315W ... NKP2 biological process unknown molecular function unknown spindle pole body* | YLR316C	YJM428	YJM428 vs related control
YLR315W	YLR315W ... NKP2 biological process unknown molecular function unknown spindle pole body* | YLR316C	YPS1009	YPS1009 vs related control
YLR321C	YLR321C ... SFH1 chromatin remodeling protein binding RSC complex | YLR322W	YJM428	YJM428 vs related control
YLR321C	YLR321C ... SFH1 chromatin remodeling protein binding RSC complex | YLR322W	YPS1009	YPS1009 vs related control
YLR324W	YLR324W ... PEX30 peroxisome organization and bi molecular function unknown peroxisome* | YLR325C	YPS1009	YPS1009 vs related control
YLR325C	YLR325C RP cluster RPL38 protein biosynthesis structural constituent of ribosome cytosolic large ribosomal subunit ( | YLR326W	YJM428	YJM428 vs related control
YLR325C	YLR325C RP cluster RPL38 protein biosynthesis structural constituent of ribosome cytosolic large ribosomal subunit ( | YLR326W	YPS1009	YPS1009 vs related control
YLR328W	YLR328W ... NMA1 NAD metabolism nicotinamide-nucleotide adenylyltracytoplasm* | YLR329W	YJM428	YJM428 vs related control
YLR328W	YLR328W ... NMA1 NAD metabolism nicotinamide-nucleotide adenylyltracytoplasm* | YLR329W	YPS1009	YPS1009 vs related control
YLR337C	YLR337C ... VRP1 endocytosis* actin binding actin cortical patch | YLR338W	YJM428	YJM428 vs related control
YLR339C	YLR339C RP cluster | YLR340W	YJM428	YJM428 vs related control
YLR344W	YLR344W RP cluster RPL26A protein biosynthesis structural constituent of ribosome*cytosolic large ribosomal subunit ( | YLR345W	YJM428	YJM428 vs related control
YLR354C	YLR354C ... TAL1 pentose-phosphate shunt transaldolase activity cytoplasm | YLR355C	YPS1009	YPS1009 vs related control
YLR357W	YLR357W ... RSC2 chromatin remodeling* molecular function unknown RSC complex | YLR358C	YPS1009	YPS1009 vs related control
YLR363C	YLR363C ... NMD4 mRNA catabolism, nonsense-medi molecular function unknown cytoplasm | YLR363W-A	YPS1009	YPS1009 vs related control
YLR364W	YLR364W ˜ GRX8 biological process unknown molecular function unknown | Glutaredoxin that employs a dithiol mechanism of catalysis; monomeric; activity is low and null mutation does not affect sensitivity to oxidative stress; GFP-fusion protein localizes to the cytoplasm; expression strongly induced by arsenicYLR365W	YPS1009	YPS1009 vs related control
YLR371W	YLR371W ... ROM2 cell wall organization and bio signal transducer activity* bud tip | YLR372W	YPS1009	YPS1009 vs related control
YLR382C	YLR382C ... NAM2 Group I intron splicing* mRNA binding* mitochondrion | YLR383W	YJM428	YJM428 vs related control
YLR382C	YLR382C ... NAM2 Group I intron splicing* mRNA binding* mitochondrion | YLR383W	YPS1009	YPS1009 vs related control
YLR393W	YLR393W ... ATP10 protein complex assembly chaperone binding mitochondrial membrane | YLR394W	YPS1009	YPS1009 vs related control
YLR395C	YLR395C ... COX8 aerobic respiration* cytochrome-c oxidase activity respiratory chain complex IV (sensu | YLR396C	YPS1009	YPS1009 vs related control
YLR399C	YLR399C ... BDF1 DNA repair* transcription regulator activity nucleus* | YLR400W	YJM428	YJM428 vs related control
YLR399C	YLR399C ... BDF1 DNA repair* transcription regulator activity nucleus* | YLR400W	YPS1009	YPS1009 vs related control
YLR401C	YLR401C PAC cluster DUS3 tRNA modification tRNA dihydrouridine synthase activicytoplasm* | YLR402W	YJM428	YJM428 vs related control
YLR401C	YLR401C PAC cluster DUS3 tRNA modification tRNA dihydrouridine synthase activicytoplasm* | YLR402W	YPS1009	YPS1009 vs related control
YLR402W	YLR402W ... | YLR403W	YJM428	YJM428 vs related control
YLR402W	YLR402W ... | YLR403W	YPS1009	YPS1009 vs related control
YLR408C	YLR408C ... YLR408C biological process unknown molecular function unknown endosome | YLR409C	YJM428	YJM428 vs related control
YLR408C	YLR408C ... YLR408C biological process unknown molecular function unknown endosome | YLR409C	YPS1009	YPS1009 vs related control
YLR411W	YLR411W ... CTR3 copper ion import copper uptake transporter activity integral to plasma membrane | YLR412C-A	YJM428	YJM428 vs related control
YLR411W	YLR411W ... CTR3 copper ion import copper uptake transporter activity integral to plasma membrane | YLR412C-A	YPS1009	YPS1009 vs related control
YLR426W	YLR426W ... YLR426W biological process unknown molecular function unknown mitochondrion | YLR427W	YJM428	YJM428 vs related control
YLR438W	YLR438W ... CAR2 arginine catabolism ornithine-oxo-acid transaminase actcytoplasm* | YLR439W	YPS1009	YPS1009 vs related control
YLR439W	YLR439W ... MRPL4 protein biosynthesis structural constituent of ribosome mitochondrial large ribosomal subun | YLR440C	YJM428	YJM428 vs related control
YLR439W	YLR439W ... MRPL4 protein biosynthesis structural constituent of ribosome mitochondrial large ribosomal subun | YLR440C	YPS1009	YPS1009 vs related control
YLR442C	YLR442C ... SIR3 double-strand break repair via histone binding* mitochondrion* | YLR443W	YJM428	YJM428 vs related control
YLR442C	YLR442C ... SIR3 double-strand break repair via histone binding* mitochondrion* | YLR443W	YPS1009	YPS1009 vs related control
YPL013C	YPL013C ... MRPS16 protein biosynthesis structural constituent of ribosome mitochondrial small ribosomal subun | YPL014W	YJM428	YJM428 vs related control
YPL018W	YPL018W ... CTF19 chromosome segregation* protein binding nucleus* | YPL019C	YJM428	YJM428 vs related control
YPL019C	YPL019C ... VTC3 vacuole fusion, non-autophagic molecular function unknown vacuolar membrane | YPL020C	YJM428	YJM428 vs related control
YPL026C	YPL026C ... SKS1 protein amino acid phosphoryla protein serine/threonine kinase actcytoplasm | YPL027W	YJM428	YJM428 vs related control
YPL029W	YPL029W ... SUV3 RNA catabolism ATP-dependent RNA helicase activitymitochondrion* | YPL030W	YJM428	YJM428 vs related control
YPL031C	YPL031C ... PHO85 protein amino acid phosphoryla cyclin-dependent protein kinase actnucleus | YPL032C	YJM428	YJM428 vs related control
YPL038W	YPL038W ... MET31 regulation of transcription* DNA binding* cytoplasm* | YPL038W-A	YJM428	YJM428 vs related control
YPL040C	YPL040C ... ISM1 protein biosynthesis* isoleucine-tRNA ligase activity mitochondrion | YPL041C	YJM428	YJM428 vs related control
YPL044C	YPL044C PAC cluster | YPL045W	YJM428	YJM428 vs related control
YPL049C	YPL049C ... DIG1 invasive growth (sensu Sacchar DNA binding* nucleus | YPL050C	YJM428	YJM428 vs related control
YPL058C	YPL058C ... PDR12 transport* xenobiotic-transporting ATPase actiplasma membrane | YPL059W	YJM428	YJM428 vs related control
YPL063W	YPL063W ... TIM50 mitochondrial matrix protein i molecular function unknown mitochondrial inner membrane preseq | YPL064C	YJM428	YJM428 vs related control
YPL064C	YPL064C ... CWC27 biological process unknown molecular function unknown spliceosome complex | YPL065W	YJM428	YJM428 vs related control
YPL067C	YPL067C ... YPL067C biological process unknown molecular function unknown cytoplasm | YPL068C	YJM428	YJM428 vs related control
YPL075W	YPL075W ... GCR1 positive regulation of transcr DNA binding* nucleus | YPL076W	YJM428	YJM428 vs related control
YPL077C	YPL077C ... YPL077C biological process unknown molecular function unknown cellular component unknown | YPL078C	YJM428	YJM428 vs related control
YPL078C	YPL078C ... ATP4 ATP synthesis coupled proton t structural molecule activity* "proton-transporting ATP synthase, s" | YPL079W	YJM428	YJM428 vs related control
YPL092W	YPL092W ... SSU1 sulfite transport sulfite transporter activity plasma membrane | YPL093W	YJM428	YJM428 vs related control
YPL097W	YPL097W ... MSY1 tyrosyl-tRNA aminoacylation tyrosine-tRNA ligase activity mitochondrion | YPL098C	YJM428	YJM428 vs related control
YPL099C	YPL099C ˜ AIM43 biological process unknown molecular function unknown mitochondrion | Protein of unknown function; the authentic, non-tagged protein is detected in purified mitochondria in high-throughput studies; null mutant displays elevated frequency of mitochondrial genome lossYPL100W	YJM428	YJM428 vs related control
YPL105C	YPL105C ˜ SYH1 biological process unknown molecular function unknown | Protein of unknown function that may interact with ribosomes, based on co-purification experiments; authentic, non-tagged protein is detected in highly purified mitochondria in high-throughput studiesYPL106C	YJM428	YJM428 vs related control
YPL118W	YPL118W ... MRP51 protein biosynthesis* structural constituent of ribosome mitochondrial small ribosomal subun | YPL119C	YJM428	YJM428 vs related control
YPL127C	YPL127C ... HHO1 regulation of transcription, D DNA binding nucleus* | YPL128C	YJM428	YJM428 vs related control
YPL132W	YPL132W ... COX11 aerobic respiration* copper ion binding mitochondrial inner membrane* | YPL133C	YJM428	YJM428 vs related control
YPL145C	YPL145C ... KES1 vesicle-mediated transport* oxysterol binding cytoplasm* | YPL146C	YJM428	YJM428 vs related control
YPL153C	YPL153C ... RAD53 DNA repair* protein threonine/tyrosine kinase anucleus | YPL154C	YJM428	YJM428 vs related control
YPL158C	YPL158C ˜ AIM44 biological process unknown molecular function unknown | Protein of unknown function; GFP-fusion protein localizes to the bud neck; transcription is regulated by Swi5p; null mutant displays elevated frequency of mitochondrial genome lossYPL159C	YJM428	YJM428 vs related control
YPL172C	YPL172C ... COX10 protein complex assembly* protoheme IX farnesyltransferase acmitochondrial inner membrane | YPL173W	YJM428	YJM428 vs related control
YPL173W	YPL173W ... MRPL40 protein biosynthesis structural constituent of ribosome mitochondrial large ribosomal subun | YPL174C	YJM428	YJM428 vs related control
YPL177C	YPL177C ... CUP9 transcription initiation from specific RNA polymerase II transcrinucleus | YPL178W	YJM428	YJM428 vs related control
YPL183W-A	YPL183W-A ˜ RTC6 biological process unknown molecular function unknown | Homolog of the prokaryotic ribosomal protein L36, likely to be a mitochondrial ribosomal protein coded in the nuclear genome; null mutation suppresses cdc13-1 temperature sensitivityYPL184C	YJM428	YJM428 vs related control
YPL189C-A	YPL189C-A ˜ COA2 biological process unknown molecular function unknown | Cytochrome oxidase assembly factor; null mutation results in respiratory deficiency with specific loss of cytochrome oxidase activity; functions downstream of assembly factors Mss51p and Coa1p and interacts with assembly factor Shy1pYPL189W	YJM428	YJM428 vs related control
YPL190C	YPL190C ... NAB3 regulation of transcription fr poly(A) binding nucleus | YPL191C	YJM428	YJM428 vs related control
YPL215W	YPL215W ... CBP3 protein complex assembly molecular function unknown mitochondrial membrane | YPL216W	YJM428	YJM428 vs related control
YPL232W	YPL232W ... SSO1 vesicle fusion* t-SNARE activity integral to plasma membrane | YPL233W	YJM428	YJM428 vs related control
YPL238C	YPL238C PAC cluster | YPL239W	YJM428	YJM428 vs related control
YPL248C	YPL248C ... GAL4 regulation of transcription, D transcriptional activator activity nucleus | YPL249C	YJM428	YJM428 vs related control
YPL254W	YPL254W ... HFI1 transcription from RNA polymer transcription cofactor activity SAGA complex* | YPL255W	YJM428	YJM428 vs related control
YPR004C	YPR004C ˜ AIM45 biological process unknown electron carrier activity | Protein with similarity to mammalian electron transfer flavoprotein complex subunit ETF-alpha; interacts with frataxin, Yfh1p; null mutant displays elevated frequency of mitochondrial genome lossYPR005C	YJM428	YJM428 vs related control
YPR010C-A	YPR010C-A ˜ Putative protein of unknown function; conserved among Saccharomyces sensu stricto speciesYPR137C-A	YJM428	YJM428 vs related control
YPR013C	YPR013C ... YPR013C biological process unknown molecular function unknown cellular component unknown | YPR014C	YJM428	YJM428 vs related control
YPR016C	YPR016C PAC cluster TIF6 ribosomal large subunit biogen molecular function unknown cytoplasm* | YPR016W-A	YJM428	YJM428 vs related control
YPR034W	YPR034W PAC cluster ARP7 chromatin remodeling general RNA polymerase II transcripnucleus* | YPR035W	YJM428	YJM428 vs related control
YPR047W	YPR047W ... MSF1 protein biosynthesis phenylalanine-tRNA ligase activity mitochondrion | YPR048W	YJM428	YJM428 vs related control
YPR065W	YPR065W ... ROX1 negative regulation of transcr specific transcriptional repressor nuclear chromosome | YPR066W	YJM428	YJM428 vs related control
YPR082C	YPR082C ... DIB1 nuclear mRNA splicing, via spl "RNA splicing factor activity, trans"U4/U6 x U5 tri-snRNP complex | YPR083W	YJM428	YJM428 vs related control
YPR100W	YPR100W ... MRPL51 protein biosynthesis* structural constituent of ribosome mitochondrial large ribosomal subun | YPR101W	YJM428	YJM428 vs related control
YPR120C	YPR120C ... CLB5 G1/S transition of mitotic cel cyclin-dependent protein kinase regnucleus | YPR121W	YJM428	YJM428 vs related control
YPR124W	YPR124W ... CTR1 copper ion import copper uptake transporter activity plasma membrane | YPR125W	YJM428	YJM428 vs related control
YPR125W	YPR125W ˜ YLH47 biological process unknown molecular function unknown | Mitochondrial inner membrane protein exposed to the mitochondrial matrix, associates with mitochondrial ribosomes, NOT required for respiratory growth; homolog of human Letm1, a protein implicated in Wolf-Hirschhorn syndromeYPR126C	YJM428	YJM428 vs related control
YPR130C	YPR130C ... | YPR131C	YJM428	YJM428 vs related control
YPR131C	YPR131C ... NAT3 N-terminal peptidyl-methionine peptide alpha-N-acetyltransferase acytoplasm | YPR132W	YJM428	YJM428 vs related control
YPR133C	YPR133C ˜ SPN1 (IWS1) nucleotide-excision repair* delta DNA polymerase activity delta DNA polymerase complex | Protein that interacts with Spt6p and copurifies with Spt5p and RNA polymerase II, probable transcriptional elongation factor; metazoan homologs contain an acidic N terminus; mutations in the gene confer an Spt- phenotypeYPR133W-A	YJM428	YJM428 vs related control
YPR133W-A	YPR133W-A ... TOM5 mitochondrial matrix protein i protein transporter activity mitochondrial outer membrane transl | YPR134W	YJM428	YJM428 vs related control
YPR145W	YPR145W PAC cluster ASN1 asparagine biosynthesis asparagine synthase (glutamine-hydrcytoplasm | YPR146C	YJM428	YJM428 vs related control
YPR166C	YPR166C ... MRP2 protein biosynthesis structural constituent of ribosome mitochondrial small ribosomal subun | YPR167C	YJM428	YJM428 vs related control
YPR171W	YPR171W ... BSP1 actin cytoskeleton organizatio "protein binding, bridging" bud neck* | YPR172W	YJM428	YJM428 vs related control
YHR084W	YHR084W ... STE12 pseudohyphal growth* transcription factor activity nucleus | YHR085W	NCYC110	NCYC110 vs related control
YIL131C	YIL131C ... FKH1 pseudohyphal growth* transcription factor activity nucleus | YIL132C	Y2189	Y2189 vs related control
YIL031W	YIL031W ... ULP2 mitotic spindle checkpoint* cysteine-type peptidase activity* nucleus | YIL032C	K9	K9 vs related control
YHR172W	YHR172W ... SPC97 microtubule nucleation structural constituent of cytoskeleouter plaque of spindle pole body* | YHR173C	NCYC110	NCYC110 vs related control
YCR073C	YCR073C ... SSK22 protein amino acid phosphoryla MAP kinase kinase kinase activity cellular component unknown | YCR073W-A	K1	K1 vs related control
YLR153C	YLR153C ... ACS2 acetyl-CoA biosynthesis acetate-CoA ligase activity cytosol | YLR154C	YJM428	YJM428 vs related control
YIL055C	YIL055C ... YIL055C biological process unknown molecular function unknown cellular component unknown | YIL056W	K9	K9 vs related control
YHR070W	YHR070W ... TRM5 tRNA methylation tRNA (guanine) methyltransferase accytoplasm* | YHR071C-A	NCYC110	NCYC110 vs related control
YPL169C	YPL169C ... MEX67 mRNA-nucleus export protein binding* cytoplasm* | YPL170W	YJM428	YJM428 vs related control
YLR228C	YLR228C ... ECM22 sterol biosynthesis RNA polymerase II transcription facnucleus | YLR229C	YPS1009	YPS1009 vs related control
YAR042W	YAR042W ... SWH1 steroid biosynthesis phosphatidylinositol binding endoplasmic reticulum* | YAR047C	Y2189	Y2189 vs related control
YKL068W	YKL068W ... NUP100 mRNA-nucleus export* structural molecule activity nuclear pore | YKL068W-A	Y2189	Y2189 vs related control
YJL147C	YJL147C ... YJL147C biological process unknown molecular function unknown mitochondrion | YJL148W	K9	K9 vs related control
YLR139C	YLR139C ... SLS1 protein biosynthesis* molecular function unknown integral to membrane* | YLR140W	YJM428	YJM428 vs related control
YHR164C	YHR164C ... DNA2 DNA repair* ATP-dependent DNA helicase activitynucleus* | YHR165C	NCYC110	NCYC110 vs related control
YPL032C	YPL032C ... SVL3 endocytosis molecular function unknown cytoplasm* | YPL033C	YJM428	YJM428 vs related control
YCL037C	YCL037C PAC cluster SRO9 protein biosynthesis RNA binding polysome | YCL038C	Y2189	Y2189 vs related control
YCL037C	YCL037C PAC cluster SRO9 protein biosynthesis RNA binding polysome | YCL038C	K1	K1 vs related control
YLR223C	YLR223C ... IFH1 rRNA processing* transcription factor activity nucleus* | YLR224W	YPS1009	YPS1009 vs related control
YPR018W	YPR018W ... RLF2 nucleosome assembly transcription regulator activity nucleus* | YPR019W	YJM428	YJM428 vs related control
YLR173W	YLR173W ... YLR173W biological process unknown molecular function unknown cellular component unknown | YLR174W	YPS1009	YPS1009 vs related control
YIL107C	YIL107C iESR cluster PFK26 fructose 2,6-bisphosphate meta 6-phosphofructo-2-kinase activity cytoplasm | YIL108W	K9	K9 vs related control
YHR009C	YHR009C ... YHR009C biological process unknown molecular function unknown cytoplasm | YHR010W	NCYC110	NCYC110 vs related control
YLR330W	YLR330W ... CHS5 spore wall assembly (sensu Fun molecular function unknown cytoplasm | YLR331C	YJM428	YJM428 vs related control
YLR330W	YLR330W ... CHS5 spore wall assembly (sensu Fun molecular function unknown cytoplasm | YLR331C	YPS1009	YPS1009 vs related control
YHR131C	YHR131C ... YHR131C biological process unknown molecular function unknown cytoplasm | YHR131W-A	NCYC110	NCYC110 vs related control
YAL019W	YAL019W ... FUN30 chromosome organization and bi molecular function unknown nucleus* | YAL020C	Y2189	Y2189 vs related control
YLR336C	YLR336C PAC cluster SGD1 osmoregulation molecular function unknown nucleus* | YLR337C	YJM428	YJM428 vs related control
YLR118C	YLR118C ... YLR118C biological process unknown "hydrolase activity, acting on ester"cytoplasm* | YLR119W	YJM428	YJM428 vs related control
YLR177W	YLR177W ... YLR177W biological process unknown molecular function unknown cytoplasm | YLR178C	YJM428	YJM428 vs related control
YLR177W	YLR177W ... YLR177W biological process unknown molecular function unknown cytoplasm | YLR178C	YPS1009	YPS1009 vs related control
YAL004W	YAL004W ... | YAL005C	Y2189	Y2189 vs related control
YAL014C	YAL014C ... SYN8 transport SNAP receptor activity endosome | YAL015C	Y2189	Y2189 vs related control
YAL037C-B	YAL037C-B ˜ Dubious Dubious open reading frame unlikely to encode a protein; identified by gene-trapping, microarray-based expression analysis, and genome-wide homology searchingYAL042C-A	Y2189	Y2189 vs related control
YAL041W	YAL041W ... CDC24 establishment of cell polarity signal transducer activity* nucleus* | YAL042W	Y2189	Y2189 vs related control
YAL042W	YAL042W ... ERV46 ER to Golgi transport molecular function unknown integral to endoplasmic reticulum m | YAL043C	Y2189	Y2189 vs related control
YAL044W-A	YAL044W-A ... YAL044W-A biological process unknown molecular function unknown cellular component unknown | YAL045C	Y2189	Y2189 vs related control
YAL058W	YAL058W ... CNE1 protein folding* unfolded protein binding integral to endoplasmic reticulum m | YAL059W	Y2189	Y2189 vs related control
YAL059W	YAL059W PAC cluster ECM1 cell wall organization and bio molecular function unknown nucleus* | YAL060W	Y2189	Y2189 vs related control
YAL060W	YAL060W ... BDH1 butanediol fermentation "(R,R)-butanediol dehydrogenase acti"cytoplasm | YAL061W	Y2189	Y2189 vs related control
YAR002W	YAR002W ... NUP60 nucleocytoplasmic transport* structural constituent of nuclear pnuclear pore | YAR003W	Y2189	Y2189 vs related control
YCL004W	YCL004W ... PGS1 phospholipid biosynthesis CDP-diacylglycerol-glycerol-3-phospmitochondrion | YCL005W	K1	K1 vs related control
YCL005W	YCL005W ˜ LDB16 biological process unknown molecular function unknown | Protein of unknown function; null mutants have decreased net negative cell surface charge; GFP-fusion protein expression is induced in response to the DNA-damaging agent MMS; native protein is detected in purified mitochondriaYCL005W-A	K1	K1 vs related control
YCL005W-A	YCL005W-A ... VMA9 vacuolar acidification* "ATPase activity, coupled to transme"vacuolar membrane* | YCL007C	K1	K1 vs related control
YCL009C	YCL009C ... ILV6 branched chain family amino ac enzyme regulator activity* mitochondrion* | YCL010C	K1	K1 vs related control
YCL011C	YCL011C ... GBP2 telomere maintenance* RNA binding* nucleus | YCL012C	Y2189	Y2189 vs related control
YCL011C	YCL011C ... GBP2 telomere maintenance* RNA binding* nucleus | YCL012C	K1	K1 vs related control
YCL016C	YCL016C ... DCC1 mitotic sister chromatid cohes molecular function unknown DNA replication factor C complex | YCL017C	Y2189	Y2189 vs related control
YCL016C	YCL016C ... DCC1 mitotic sister chromatid cohes molecular function unknown DNA replication factor C complex | YCL017C	K1	K1 vs related control
YCL017C	YCL017C ... NFS1 iron ion homeostasis* cystathionine gamma-lyase activity mitochondrion | YCL018W	Y2189	Y2189 vs related control
YCL025C	YCL025C ... AGP1 amino acid transport amino acid transporter activity* plasma membrane | YCL026C-A	K1	K1 vs related control
YCL032W	YCL032W ... STE50 signal transduction during con protein kinase regulator activity cytoplasm | YCL033C	Y2189	Y2189 vs related control
YCL032W	YCL032W ... STE50 signal transduction during con protein kinase regulator activity cytoplasm | YCL033C	K1	K1 vs related control
YCL033C	YCL033C ˜ MXR2 response to oxidative stress protein-methionine-R-oxide red | Methionine-R-sulfoxide reductase, involved in the response to oxidative stress; protects iron-sulfur clusters from oxidative inactivation along with MXR1; involved in the regulation of lifespanYCL034W	K1	K1 vs related control
YCL036W	YCL036W ... GFD2 biological process unknown molecular function unknown cellular component unknown | YCL037C	Y2189	Y2189 vs related control
YCL036W	YCL036W ... GFD2 biological process unknown molecular function unknown cellular component unknown | YCL037C	K1	K1 vs related control
YCL038C	YCL038C ... ATG22 protein-vacuolar targeting* molecular function unknown integral to membrane* | YCL039W	K1	K1 vs related control
YCL039W	YCL039W ... GID7 negative regulation of glucone molecular function unknown cytoplasm* | YCL040W	K1	K1 vs related control
YCL043C	YCL043C ... PDI1 protein folding protein disulfide isomerase activitendoplasmic reticulum lumen | YCL044C	K1	K1 vs related control
YCL044C	YCL044C ˜ MGR1 biological process unknown molecular function unknown | Subunit of the mitochondrial (mt) i-AAA protease supercomplex, which degrades misfolded mitochondrial proteins; forms a subcomplex with Mgr3p that binds to substrates to facilitate proteolysis; required for growth of cells lacking mtDNAYCL045C	K1	K1 vs related control
YCL045C	YCL045C ˜ PAC cluster EMC1 biological process unknown molecular function unknown | Member of a transmembrane complex required for efficient folding of proteins in the ER; null mutant displays induction of the unfolded protein response; interacts with Gal80pYCL046W	Y2189	Y2189 vs related control
YCL045C	YCL045C ˜ PAC cluster EMC1 biological process unknown molecular function unknown | Member of a transmembrane complex required for efficient folding of proteins in the ER; null mutant displays induction of the unfolded protein response; interacts with Gal80pYCL046W	K1	K1 vs related control
YCL047C	YCL047C ... YCL047C biological process unknown molecular function unknown cellular component unknown | YCL048W	K1	K1 vs related control
YCL051W	YCL051W ... LRE1 cell wall organization and bio transcription regulator activity* cell wall (sensu Fungi) | YCL052C	K1	K1 vs related control
YCL052C	YCL052C ... PBN1 GPI anchor biosynthesis* mannosyltransferase activity endoplasmic reticulum | YCL054W	K1	K1 vs related control
YCL055W	YCL055W ... KAR4 meiosis* transcription regulator activity nucleus | YCL056C	Y2189	Y2189 vs related control
YCL055W	YCL055W ... KAR4 meiosis* transcription regulator activity nucleus | YCL056C	K1	K1 vs related control
YCL057C-A	YCL057C-A ... YCL057C-A biological process unknown molecular function unknown cellular component unknown | YCL057W	Y2189	Y2189 vs related control
YCL057W	YCL057W ... PRD1 proteolysis and peptidolysis metalloendopeptidase activity* cytoplasm* | YCL058C	K1	K1 vs related control
YCL058W-A	YCL058W-A ... YCL058W-A biological process unknown molecular function unknown cellular component unknown | YCL059C	Y2189	Y2189 vs related control
YCL058W-A	YCL058W-A ... YCL058W-A biological process unknown molecular function unknown cellular component unknown | YCL059C	K1	K1 vs related control
YCL063W	YCL063W ... VAC17 vacuole inheritance receptor activity vacuolar membrane | YCL064C	K1	K1 vs related control
YCR002C	YCR002C ... CDC10 cell wall organization and bio GTPase activity* septin ring (sensu Saccharomyces) | YCR003W	K1	K1 vs related control
YCR004C	YCR004C iESR cluster YCP4 biological process unknown electron transporter activity cytoplasm* | YCR005C	K1	K1 vs related control
YCR005C	YCR005C ... CIT2 glutamate biosynthesis* citrate (Si)-synthase activity mitochondrion* | YCR006C	Y2189	Y2189 vs related control
YCR007C	YCR007C ... YCR007C biological process unknown molecular function unknown cellular component unknown | YCR008W	K1	K1 vs related control
YCR008W	YCR008W ... SAT4 G1/S transition of mitotic cel protein kinase activity cellular component unknown | YCR009C	Y2189	Y2189 vs related control
YCR008W	YCR008W ... SAT4 G1/S transition of mitotic cel protein kinase activity cellular component unknown | YCR009C	K1	K1 vs related control
YCR009C	YCR009C ... RVS161 endocytosis* cytoskeletal protein binding actin cortical patch* | YCR010C	K1	K1 vs related control
YCR011C	YCR011C ... ADP1 transport "ATPase activity, coupled to transme"cytoplasm* | YCR012W	K1	K1 vs related control
YCR013C	YCR013C ... | YCR014C	K1	K1 vs related control
YCR016W	YCR016W PAC cluster YCR016W biological process unknown molecular function unknown nucleus* | YCR017C	K1	K1 vs related control
YCR019W	YCR019W ... MAK32 viral life cycle molecular function unknown cellular component unknown | YCR020C	Y2189	Y2189 vs related control
YCR019W	YCR019W ... MAK32 viral life cycle molecular function unknown cellular component unknown | YCR020C	K1	K1 vs related control
YCR020C	YCR020C ... PET18 mitochondrion organization and molecular function unknown cellular component unknown | YCR020C-A	Y2189	Y2189 vs related control
YCR023C	YCR023C ... YCR023C biological process unknown molecular function unknown cellular component unknown | YCR024C	K1	K1 vs related control
YCR025C	YCR025C ... | YCR026C	Y2189	Y2189 vs related control
YCR026C	YCR026C ... NPP1 biological process unknown molecular function unknown cellular component unknown | YCR027C	Y2189	Y2189 vs related control
YCR026C	YCR026C ... NPP1 biological process unknown molecular function unknown cellular component unknown | YCR027C	K1	K1 vs related control
YCR027C	YCR027C ... RHB1 L-arginine transport* GTPase activity extrinsic to plasma membrane | YCR028C	K1	K1 vs related control
YCR028C	YCR028C ... FEN2 endocytosis* pantothenate transporter activity plasma membrane | YCR028C-A	Y2189	Y2189 vs related control
YCR028C	YCR028C ... FEN2 endocytosis* pantothenate transporter activity plasma membrane | YCR028C-A	K1	K1 vs related control
YCR031C	YCR031C RP cluster RPS14A protein biosynthesis* structural constituent of ribosome*cytosolic small ribosomal subunit ( | YCR032W	K1	K1 vs related control
YCR032W	YCR032W ... BPH1 cell wall organization and bio molecular function unknown mitochondrion | YCR033W	K1	K1 vs related control
YCR038C	YCR038C ... BUD5 pseudohyphal growth* signal transducer activity* bud neck* | YCR038W-A	K1	K1 vs related control
YCR042C	YCR042C ... TAF2 transcription initiation from general RNA polymerase II transcriptranscription factor TFIID complex | YCR043C	K1	K1 vs related control
YCR044C	YCR044C ... PER1 response to unfolded protein* molecular function unknown vacuolar membrane (sensu Fungi) | YCR045C	K1	K1 vs related control
YCR047C	YCR047C ... BUD23 bud site selection S-adenosylmethionine-dependent methcytoplasm* | YCR048W	Y2189	Y2189 vs related control
YCR048W	YCR048W ... ARE1 sterol metabolism sterol O-acyltransferase activity endoplasmic reticulum | YCR049C	K1	K1 vs related control
YCR051W	YCR051W ... YCR051W biological process unknown molecular function unknown cytoplasm* | YCR052W	Y2189	Y2189 vs related control
YCR051W	YCR051W ... YCR051W biological process unknown molecular function unknown cytoplasm* | YCR052W	K1	K1 vs related control
YCR054C	YCR054C ... CTR86 biological process unknown molecular function unknown cytoplasm | YCR057C	K1	K1 vs related control
YCR057C	YCR057C PAC cluster PWP2 35S primary transcript process snoRNA binding cytoplasm* | YCR059C	Y2189	Y2189 vs related control
YCR057C	YCR057C PAC cluster PWP2 35S primary transcript process snoRNA binding cytoplasm* | YCR059C	K1	K1 vs related control
YCR059C	YCR059C ... YIH1 regulation of amino acid metab molecular function unknown cytoplasm* | YCR060W	K1	K1 vs related control
YCR060W	YCR060W ... TAH1 protein folding chaperone binding cytoplasm* | YCR061W	K1	K1 vs related control
YCR061W	YCR061W iESR cluster YCR061W biological process unknown molecular function unknown cytoplasm | YCR063W	K1	K1 vs related control
YCR063W	YCR063W ... BUD31 bud site selection* molecular function unknown nucleus | YCR064C	Y2189	Y2189 vs related control
YCR063W	YCR063W ... BUD31 bud site selection* molecular function unknown nucleus | YCR064C	K1	K1 vs related control
YCR066W	YCR066W ... RAD18 DNA repair ubiquitin conjugating enzyme activinuclear chromatin | YCR067C	K1	K1 vs related control
YCR069W	YCR069W ... CPR4 biological process unknown peptidyl-prolyl cis-trans isomerasemembrane | YCR071C	K1	K1 vs related control
YCR072C	YCR072C ˜ PAC cluster RSA4 biological process unknown molecular function unknown | WD-repeat protein involved in ribosome biogenesis; may interact with ribosomes; required for maturation and efficient intra-nuclear transport or pre-60S ribosomal subunits, localizes to the nucleolusYCR073C	Y2189	Y2189 vs related control
YCR072C	YCR072C ˜ PAC cluster RSA4 biological process unknown molecular function unknown | WD-repeat protein involved in ribosome biogenesis; may interact with ribosomes; required for maturation and efficient intra-nuclear transport or pre-60S ribosomal subunits, localizes to the nucleolusYCR073C	K1	K1 vs related control
YCR075C	YCR075C ... ERS1 L-cystine transport L-cystine transporter activity integral to membrane | YCR075W-A	K1	K1 vs related control
YCR075W-A	YCR075W-A ... YCR075W-A biological process unknown molecular function unknown cellular component unknown | YCR076C	K1	K1 vs related control
YCR077C	YCR077C ... PAT1 chromosome segregation* molecular function unknown cytosolic small ribosomal subunit ( | YCR079W	Y2189	Y2189 vs related control
YCR079W	YCR079W ˜ PTC6 biological process unknown phosphoprotein phosphatase act | Mitochondrial protein phosphatase of type 2C with similarity to mammalian PP1Ks; involved in mitophagy; null mutant is sensitive to rapamycin and has decreased phosphorylation of the Pda1 subunit of pyruvate dehydrogenaseYCR081W	Y2189	Y2189 vs related control
YCR079W	YCR079W ˜ PTC6 biological process unknown phosphoprotein phosphatase act | Mitochondrial protein phosphatase of type 2C with similarity to mammalian PP1Ks; involved in mitophagy; null mutant is sensitive to rapamycin and has decreased phosphorylation of the Pda1 subunit of pyruvate dehydrogenaseYCR081W	K1	K1 vs related control
YCR081W	YCR081W ... SRB8 negative regulation of transcr RNA polymerase II transcription medtranscription factor complex | YCR082W	K1	K1 vs related control
YCR083W	YCR083W ... TRX3 response to oxidative stress thiol-disulfide exchange intermediamitochondrion | YCR084C	K1	K1 vs related control
YCR084C	YCR084C ... TUP1 negative regulation of transcr general transcriptional repressor anucleus | YCR085W	Y2189	Y2189 vs related control
YCR087C-A	YCR087C-A ... YCR087C-A biological process unknown molecular function unknown nucleolus | YCR087W	Y2189	Y2189 vs related control
YCR087W	YCR087W ... | YCR088W	Y2189	Y2189 vs related control
YCR090C	YCR090C ... YCR090C biological process unknown molecular function unknown cytoplasm* | YCR091W	K1	K1 vs related control
YCR091W	YCR091W iESR cluster KIN82 protein amino acid phosphoryla protein kinase activity cellular component unknown | YCR092C	K1	K1 vs related control
YCR092C	YCR092C ... MSH3 DNA recombination* damaged DNA binding nuclear chromosome | YCR093W	K1	K1 vs related control
YCR093W	YCR093W ... CDC39 regulation of transcription fr 3'-5'-exoribonuclease activity cytoplasm* | YCR094W	K1	K1 vs related control
YCR094W	YCR094W ... CDC50 regulation of transcription* transcription regulator activity late endosome* | YCR095C	K1	K1 vs related control
YCR095C	YCR095C ˜ OCA4 biological process unknown molecular function unknown | Cytoplasmic protein required for replication of Brome mosaic virus in S. cerevisiae, which is a model system for studying replication of positive-strand RNA viruses in their natural hostsYCR095W-A	K1	K1 vs related control
YCR095W-A	YCR095W-A ... YCR095W-A biological process unknown molecular function unknown cellular component unknown | YCR096C	Y2189	Y2189 vs related control
YCR096C	YCR096C ... HMRA2 biological process unknown molecular function unknown cellular component unknown | YCR097W	K1	K1 vs related control
YCR100C	YCR100C ... YCR100C biological process unknown molecular function unknown cellular component unknown | YCR101C	K1	K1 vs related control
YHL010C	YHL010C ˜ ETP1 biological process unknown nuclear localization sequence | Putative protein of unknown function that is required for growth on ethanol; contains a zinc finger region and has homology to human BRAP2, which is a cytoplasmic protein that binds nuclear localization sequencesYHL011C	NCYC110	NCYC110 vs related control
YHL015W	YHL015W ... RPS20 protein biosynthesis structural constituent of ribosome cytosolic small ribosomal subunit ( | YHL015W-A	NCYC110	NCYC110 vs related control
YHL023C	YHL023C ... RMD11 biological process unknown molecular function unknown cellular component unknown | YHL024W	NCYC110	NCYC110 vs related control
YHL025W	YHL025W ... SNF6 chromatin remodeling general RNA polymerase II transcripSWI/SNF complex* | YHL026C	NCYC110	NCYC110 vs related control
YHL029C	YHL029C ˜ OCA5 metabolism molecular function unknown | Cytoplasmic protein required for replication of Brome mosaic virus in S. cerevisiae, which is a model system for studying replication of positive-strand RNA viruses in their natural hostsYHL030W	NCYC110	NCYC110 vs related control
YHL034C	YHL034C ... SBP1 RNA metabolism RNA binding nucleolus | YHL034W-A	NCYC110	NCYC110 vs related control
YHR001W	YHR001W ... OSH7 steroid biosynthesis oxysterol binding cellular component unknown | YHR001W-A	NCYC110	NCYC110 vs related control
YHR002W	YHR002W ... LEU5 coenzyme A transport coenzyme A transporter activity mitochondrial inner membrane | YHR003C	NCYC110	NCYC110 vs related control
YHR003C	YHR003C ... YHR003C biological process unknown molecular function unknown mitochondrion | YHR004C	NCYC110	NCYC110 vs related control
YHR006W	YHR006W ... STP2 positive regulation of transcr specific RNA polymerase II transcrinucleus | YHR007C	NCYC110	NCYC110 vs related control
YHR016C	YHR016C ... YSC84 endocytosis* molecular function unknown actin cortical patch | YHR017W	NCYC110	NCYC110 vs related control
YHR023W	YHR023W ... MYO1 response to osmotic stress* microfilament motor activity contractile ring (sensu Saccharomyc | YHR024C	NCYC110	NCYC110 vs related control
YHR028C	YHR028C ... DAP2 protein processing dipeptidyl-peptidase and tripeptidyvacuolar membrane (sensu Fungi) | YHR028W-A	NCYC110	NCYC110 vs related control
YHR031C	YHR031C ... RRM3 DNA replication DNA helicase activity* nuclear telomeric heterochromatin | YHR032C-A	NCYC110	NCYC110 vs related control
YHR034C	YHR034C ... PIH1 rRNA processing* molecular function unknown cytoplasm* | YHR035W	NCYC110	NCYC110 vs related control
YHR035W	YHR035W ... YHR035W biological process unknown molecular function unknown cellular component unknown | YHR036W	NCYC110	NCYC110 vs related control
YHR037W	YHR037W ... PUT2 glutamate biosynthesis* 1-pyrroline-5-carboxylate dehydrogemitochondrion | YHR038W	NCYC110	NCYC110 vs related control
YHR039C-A	YHR039C-A ... VMA10 vacuolar acidification* hydrogen-transporting ATPase activihydrogen-transporting ATPase V1 dom | YHR040W	NCYC110	NCYC110 vs related control
YHR056C	YHR056C ... RSC30 regulation of transcription, D DNA binding RSC complex | YHR056W-A	NCYC110	NCYC110 vs related control
YHR057C	YHR057C ... CPR2 biological process unknown peptidyl-prolyl cis-trans isomerasecellular component unknown | YHR058C	NCYC110	NCYC110 vs related control
YHR058C	YHR058C ... MED6 transcription from RNA polymer RNA polymerase II transcription medmediator complex | YHR059W	NCYC110	NCYC110 vs related control
YHR059W	YHR059W ... FYV4 biological process unknown molecular function unknown mitochondrion | YHR060W	NCYC110	NCYC110 vs related control
YHR062C	YHR062C ... RPP1 rRNA processing* ribonuclease P activity* ribonuclease MRP complex* | YHR063C	NCYC110	NCYC110 vs related control
YHR083W	YHR083W ... SAM35 mitochondrial outer membrane p protein binding mitochondrial outer membrane* | YHR084W	NCYC110	NCYC110 vs related control
YHR085W	YHR085W ... IPI1 rRNA processing* molecular function unknown nucleus* | YHR086W	NCYC110	NCYC110 vs related control
YHR086W	YHR086W ... NAM8 nuclear mRNA splicing, via spl RNA binding* commitment complex* | YHR086W-A	NCYC110	NCYC110 vs related control
YHR087W	YHR087W ˜ iESR cluster RTC3 RNA metabolism molecular function unknown | Protein of unknown function involved in RNA metabolism; has structural similarity to SBDS, the human protein mutated in Shwachman-Diamond Syndrome (the yeast SBDS ortholog = SDO1); null mutation suppresses cdc13-1 temperature sensitivityYHR088W	NCYC110	NCYC110 vs related control
YHR099W	YHR099W ... TRA1 regulation of transcription fr histone acetyltransferase activity histone acetyltransferase complex* | YHR100C	NCYC110	NCYC110 vs related control
YHR102W	YHR102W ... KIC1 cell wall organization and bio kinase activity cytoplasm* | YHR103W	NCYC110	NCYC110 vs related control
YHR107C	YHR107C ... CDC12 cell wall organization and bio GTPase activity* cytoplasm* | YHR108W	NCYC110	NCYC110 vs related control
YHR108W	YHR108W ... GGA2 Golgi to vacuole transport molecular function unknown Golgi trans face | YHR109W	NCYC110	NCYC110 vs related control
YHR111W	YHR111W ... UBA4 protein modification URM1 activating enzyme activity cytoplasm | YHR112C	NCYC110	NCYC110 vs related control
YHR113W	YHR113W ... YHR113W proteolysis and peptidolysis metalloendopeptidase activity* cytoplasm* | YHR114W	NCYC110	NCYC110 vs related control
YHR114W	YHR114W ... BZZ1 actin filament organization* molecular function unknown cytoplasm* | YHR115C	NCYC110	NCYC110 vs related control
YHR118C	YHR118C ... ORC6 DNA replication initiation* DNA replication origin binding pre-replicative complex* | YHR119W	NCYC110	NCYC110 vs related control
YHR119W	YHR119W ... SET1 chromatin silencing at telomer histone lysine N-methyltransferase COMPASS complex | YHR120W	NCYC110	NCYC110 vs related control
YHR129C	YHR129C ... ARP1 establishment of mitotic spind structural constituent of cytoskeledynactin complex | YHR130C	NCYC110	NCYC110 vs related control
YHR132W-A	YHR132W-A ... YHR132W-A biological process unknown molecular function unknown cytoplasm* | YHR133C	NCYC110	NCYC110 vs related control
YHR135C	YHR135C ... YCK1 protein amino acid phosphoryla casein kinase I activity endoplasmic reticulum* | YHR136C	NCYC110	NCYC110 vs related control
YHR136C	YHR136C ... SPL2 response to temperature enzyme inhibitor activity cytoplasm | YHR137C-A	NCYC110	NCYC110 vs related control
YHR140W	YHR140W ... YHR140W biological process unknown molecular function unknown integral to membrane | YHR141C	NCYC110	NCYC110 vs related control
YHR149C	YHR149C ... SKG6 biological process unknown molecular function unknown bud neck* | YHR150W	NCYC110	NCYC110 vs related control
YHR150W	YHR150W ... PEX28 peroxisome organization and bi molecular function unknown peroxisomal membrane | YHR151C	NCYC110	NCYC110 vs related control
YHR162W	YHR162W ... YHR162W biological process unknown molecular function unknown mitochondrion | YHR163W	NCYC110	NCYC110 vs related control
YHR165C	YHR165C ... PRP8 nuclear mRNA splicing, via spl "RNA splicing factor activity, trans"U4/U6 x U5 tri-snRNP complex* | YHR165W-A	NCYC110	NCYC110 vs related control
YHR169W	YHR169W PAC cluster DBP8 35S primary transcript process ATP-dependent RNA helicase activitynucleolus | YHR170W	NCYC110	NCYC110 vs related control
YHR176W	YHR176W ... FMO1 protein folding monooxygenase activity endoplasmic reticulum membrane | YHR177W	NCYC110	NCYC110 vs related control
YHR178W	YHR178W ... STB5 transcription* transcription factor activity nucleus | YHR179W	NCYC110	NCYC110 vs related control
YHR183W	YHR183W ... GND1 response to oxidative stress* phosphogluconate dehydrogenase (deccytoplasm* | YHR184W	NCYC110	NCYC110 vs related control
YHR186C	YHR186C ... KOG1 biological process unknown molecular function unknown mitochondrion* | YHR187W	NCYC110	NCYC110 vs related control
YHR187W	YHR187W ... IKI1 regulation of transcription fr RNA polymerase II transcription elotranscription elongation factor com | YHR188C	NCYC110	NCYC110 vs related control
YHR190W	YHR190W ... ERG9 ergosterol biosynthesis farnesyl-diphosphate farnesyltransfendoplasmic reticulum | YHR191C	NCYC110	NCYC110 vs related control
YHR193C	YHR193C PAC cluster EGD2 nascent polypeptide associatio unfolded protein binding nascent polypeptide-associated comp | YHR193C-A	NCYC110	NCYC110 vs related control
YHR195W	YHR195W ... NVJ1 microautophagy protein binding nuclear membrane | YHR196W	NCYC110	NCYC110 vs related control
YHR197W	YHR197W PAC cluster RIX1 35S primary transcript process molecular function unknown nucleus* | YHR198C	NCYC110	NCYC110 vs related control
YHR200W	YHR200W ... RPN10 ubiquitin-dependent protein ca endopeptidase activity proteasome complex (sensu Eukaryota | YHR201C	NCYC110	NCYC110 vs related control
YHR205W	YHR205W ... SCH9 protein amino acid phosphoryla protein serine/threonine kinase actcytoplasm* | YHR206W	NCYC110	NCYC110 vs related control
YHR206W	YHR206W ... SKN7 response to osmotic stress* transcription factor activity* nucleus | YHR207C	NCYC110	NCYC110 vs related control
YIL002W-A	YIL002W-A ... YIL002W-A biological process unknown molecular function unknown cellular component unknown | YIL003W	K9	K9 vs related control
YIL009C-A	YIL009C-A ... EST3 telomerase-dependent telomere telomerase activity nucleus* | YIL009W	K9	K9 vs related control
YIL009W	YIL009W ... FAA3 lipid metabolism* long-chain-fatty-acid-CoA ligase accellular component unknown | YIL010W	Y2189	Y2189 vs related control
YIL014C-A	YIL014C-A ... YIL014C-A biological process unknown molecular function unknown cellular component unknown | YIL014W	K9	K9 vs related control
YIL016W	YIL016W ... SNL1 nuclear pore organization and molecular function unknown mitochondrion* | YIL017C	Y2189	Y2189 vs related control
YIL020C	YIL020C PAC cluster HIS6 histidine biosynthesis 1-(5-phosphoribosyl)-5-[(5-phosphorintracellular | YIL020C-A	Y2189	Y2189 vs related control
YIL027C	YIL027C ... KRE27 biological process unknown molecular function unknown endoplasmic reticulum | YIL028W	K9	K9 vs related control
YIL033C	YIL033C ... BCY1 response to stress* cAMP-dependent protein kinase inhibcytoplasm* | YIL034C	Y2189	Y2189 vs related control
YIL034C	YIL034C ... CAP2 barbed-end actin filament capp actin filament binding actin cortical patch* | YIL035C	K9	K9 vs related control
YIL034C	YIL034C ... CAP2 barbed-end actin filament capp actin filament binding actin cortical patch* | YIL035C	Y2189	Y2189 vs related control
YIL039W	YIL039W ˜ TED1 biological process unknown molecular function unknown | Conserved phosphoesterase domain-containing protein that acts together with Emp24p/Erv25p in cargo exit from the ER; deletion confers sensitivity to 4-(N-(S-glutathionylacetyl)amino) phenylarsenoxide (GSAO)YIL040W	K9	K9 vs related control
YIL039W	YIL039W ˜ TED1 biological process unknown molecular function unknown | Conserved phosphoesterase domain-containing protein that acts together with Emp24p/Erv25p in cargo exit from the ER; deletion confers sensitivity to 4-(N-(S-glutathionylacetyl)amino) phenylarsenoxide (GSAO)YIL040W	Y2189	Y2189 vs related control
YIL041W	YIL041W ... GVP36 biological process unknown molecular function unknown cytoplasm | YIL042C	Y2189	Y2189 vs related control
YIL042C	YIL042C ˜ PKP1 biological process unknown kinase activity | Mitochondrial protein kinase involved in negative regulation of pyruvate dehydrogenase complex activity by phosphorylating the ser-133 residue of the Pda1p subunit; acts in concert with kinase Pkp2p and phosphatases Ptc5p and Ptc6pYIL043C	K9	K9 vs related control
YIL042C	YIL042C ˜ PKP1 biological process unknown kinase activity | Mitochondrial protein kinase involved in negative regulation of pyruvate dehydrogenase complex activity by phosphorylating the ser-133 residue of the Pda1p subunit; acts in concert with kinase Pkp2p and phosphatases Ptc5p and Ptc6pYIL043C	Y2189	Y2189 vs related control
YIL046W	YIL046W ... MET30 protein ubiquitination* protein binding SCF ubiquitin ligase complex* | YIL046W-A	K9	K9 vs related control
YIL046W	YIL046W ... MET30 protein ubiquitination* protein binding SCF ubiquitin ligase complex* | YIL046W-A	Y2189	Y2189 vs related control
YIL051C	YIL051C ... MMF1 mitochondrial genome maintenan molecular function unknown mitochondrion* | YIL052C	K9	K9 vs related control
YIL059C	YIL059C | YIL060W	K9	K9 vs related control
YIL062C	YIL062C ... ARC15 mitochondrion inheritance* structural molecule activity* mitochondrial membrane* | YIL063C	K9	K9 vs related control
YIL062C	YIL062C ... ARC15 mitochondrion inheritance* structural molecule activity* mitochondrial membrane* | YIL063C	Y2189	Y2189 vs related control
YIL063C	YIL063C ... YRB2 mRNA-nucleus export* structural molecule activity nuclear pore | YIL064W	Y2189	Y2189 vs related control
YIL066C	YIL066C ... RNR3 DNA replication ribonucleoside-diphosphate reductascytoplasm* | YIL066W-A	K9	K9 vs related control
YIL067C	YIL067C ... YIL067C biological process unknown molecular function unknown vacuole (sensu Fungi) | YIL068C	Y2189	Y2189 vs related control
YIL069C	YIL069C ... RPS24B protein biosynthesis structural constituent of ribosome cytosolic small ribosomal subunit ( | YIL070C	K9	K9 vs related control
YIL077C	YIL077C ... YIL077C biological process unknown molecular function unknown mitochondrion | YIL078W	Y2189	Y2189 vs related control
YIL078W	YIL078W PAC cluster THS1 protein biosynthesis threonine-tRNA ligase activity cytoplasm* | YIL079C	Y2189	Y2189 vs related control
YIL079C	YIL079C PAC cluster AIR1 mRNA-nucleus export* molecular function unknown nucleus* | YIL082W	Y2189	Y2189 vs related control
YIL083C	YIL083C ˜ CAB2 coenzyme A biosynthesis phosphopantothenate-cysteine l | Probable phosphopantothenoylcysteine synthetase (PPCS), which catalyzes the second step of coenzyme A biosynthesis from pantothenate; null mutant lethality is complemented by E. coli coaBC (encoding a bifunctional enzyme with PPCS activity)YIL084C	Y2189	Y2189 vs related control
YIL088C	YIL088C ... AVT7 transport transporter activity vacuole | YIL089W	K9	K9 vs related control
YIL099W	YIL099W iESR cluster SGA1 sporulation (sensu Fungi)* "glucan 1,4-alpha-glucosidase activi"vacuole (sensu Fungi) | YIL100C-A	K9	K9 vs related control
YIL115C	YIL115C ... NUP159 mRNA-nucleus export* structural molecule activity nuclear pore | YIL115W-A	Y2189	Y2189 vs related control
YIL116W	YIL116W ... HIS5 histidine biosynthesis histidinol-phosphate transaminase aintracellular | YIL117C	Y2189	Y2189 vs related control
YIL118W	YIL118W ... RHO3 actin filament organization* GTPase activity* intracellular | YIL119C	Y2189	Y2189 vs related control
YIL120W	YIL120W iESR cluster QDR1 multidrug transport multidrug transporter activity* plasma membrane* | YIL121W	K9	K9 vs related control
YIL121W	YIL121W ... QDR2 multidrug transport multidrug efflux pump activity integral to plasma membrane | YIL122W	K9	K9 vs related control
YIL122W	YIL122W ... POG1 G1/S-specific transcription in specific RNA polymerase II transcrinucleus | YIL123W	K9	K9 vs related control
YIL140W	YIL140W ... AXL2 bud site selection* molecular function unknown bud neck* | YIL141W	Y2189	Y2189 vs related control
YIL145C	YIL145C ... PAN6 pantothenate biosynthesis pantoate-beta-alanine ligase activicytoplasm* | YIL146C	K9	K9 vs related control
YIL148W	YIL148W RP cluster RPL40A protein biosynthesis* structural constituent of ribosome*cytosolic large ribosomal subunit ( | YIL149C	K9	K9 vs related control
YIL153W	YIL153W ... RRD1 DNA repair* protein phosphatase type 2A regulatcytoplasm* | YIL154C	K9	K9 vs related control
YIL153W	YIL153W ... RRD1 DNA repair* protein phosphatase type 2A regulatcytoplasm* | YIL154C	Y2189	Y2189 vs related control
YIR006C	YIR006C ... PAN1 endocytosis* "protein binding, bridging" plasma membrane* | YIR007W	K9	K9 vs related control
YIR006C	YIR006C ... PAN1 endocytosis* "protein binding, bridging" plasma membrane* | YIR007W	Y2189	Y2189 vs related control
YIR009W	YIR009W ... MSL1 nuclear mRNA splicing, via spl RNA binding snRNP U2 | YIR010W	Y2189	Y2189 vs related control
YIR012W	YIR012W PAC cluster SQT1 ribosomal large subunit assemb molecular function unknown cytoplasm* | YIR013C	Y2189	Y2189 vs related control
YIR019C	YIR019C ... MUC1 pseudohyphal growth* molecular function unknown plasma membrane | YIR020C	K9	K9 vs related control
YIR021W	YIR021W ... MRS1 Group I intron splicing RNA binding* mitochondrion | YIR021W-A	Y2189	Y2189 vs related control
YIR022W	YIR022W ... SEC11 signal peptide processing signal peptidase activity endoplasmic reticulum* | YIR023C-A	K9	K9 vs related control
YIR023W	YIR023W ... DAL81 regulation of transcription fr specific RNA polymerase II transcrinucleus | YIR024C	Y2189	Y2189 vs related control
YIR026C	YIR026C PAC cluster YVH1 sporulation (sensu Fungi)* protein tyrosine phosphatase activicytoplasm | YIR027C	Y2189	Y2189 vs related control
YIR028W	YIR028W ... DAL4 allantoin transport allantoin permease activity membrane | YIR029W	K9	K9 vs related control
YIR029W	YIR029W ... DAL2 allantoin catabolism allantoicase activity cellular component unknown | YIR030C	K9	K9 vs related control
YIR037W	YIR037W iESR cluster HYR1 response to oxidative stress thiol peroxidase activity* intracellular | YIR038C	K9	K9 vs related control
YIR037W	YIR037W iESR cluster HYR1 response to oxidative stress thiol peroxidase activity* intracellular | YIR038C	Y2189	Y2189 vs related control
YJL004C	YJL004C ... SYS1 Golgi to endosome transport* molecular function unknown Golgi trans face* | YJL005W	K9	K9 vs related control
YJL025W	YJL025W ... RRN7 transcription from RNA polymer RNA polymerase I transcription factRNA polymerase I transcription fact | YJL026W	K9	K9 vs related control
YJL044C	YJL044C ... GYP6 intracellular protein transpor GTPase activator activity endosome* | YJL045W	K9	K9 vs related control
YJL083W	YJL083W ... TAX4 cell wall organization and bio molecular function unknown cellular component unknown | YJL084C	K9	K9 vs related control
YJL093C	YJL093C ... TOK1 potassium ion homeostasis potassium channel activity plasma membrane | YJL094C	K9	K9 vs related control
YJL094C	YJL094C ... KHA1 monovalent inorganic cation tr potassium:hydrogen antiporter activmitochondrion* | YJL095W	K9	K9 vs related control
YJL097W	YJL097W ˜ PHS1 biological process unknown molecular function unknown | Essential 3-hydroxyacyl-CoA dehydratase of the ER membrane, involved in elongation of very long-chain fatty acids; evolutionarily conserved, similar to mammalian PTPLA and PTPLB; involved in sphingolipid biosynthesis and protein traffickingYJL098W	K9	K9 vs related control
YJL118W	YJL118W ... YJL118W biological process unknown molecular function unknown cellular component unknown | YJL119C	K9	K9 vs related control
YJL121C	YJL121C ... RPE1 pentose-phosphate shunt ribulose-phosphate 3-epimerase acticytosol | YJL122W	K9	K9 vs related control
YJL127C-B	YJL127C-B ... YJL127C-B biological process unknown molecular function unknown cellular component unknown | YJL127W-A	K9	K9 vs related control
YJL189W	YJL189W PAC cluster RPL39 protein biosynthesis structural constituent of ribosome cytosolic large ribosomal subunit ( | YJL190C	K9	K9 vs related control
YJL205C	YJL205C ... NCE101 protein secretion molecular function unknown cellular component unknown | YJL206C	K9	K9 vs related control
YJR011C	YJR011C ... YJR011C biological process unknown molecular function unknown cellular component unknown | YJR013W	K9	K9 vs related control
YJR014W	YJR014W ˜ PAC cluster TMA22 biological process unknown RNA binding cytoplasm | Protein of unknown function; associates with ribosomes and has a putative RNA binding domain; interacts with Tma20p; similar to human GRAP and human DRP1, which interacts with human Tma20p homolog MCT-1YJR015W	K9	K9 vs related control
YJR024C	YJR024C ˜ MDE1 biological process unknown molecular function unknown | 5'-methylthioribulose-1-phosphate dehydratase; acts in the methionine salvage pathway; potential Smt3p sumoylation substrate; expression downregulated by caspofungin and deletion mutant is caspofungin resistantYJR025C	K9	K9 vs related control
YJR058C	YJR058C ... APS2 vesicle-mediated transport molecular function unknown AP-2 adaptor complex | YJR059W	K9	K9 vs related control
YJR065C	YJR065C ... ARP3 actin filament organization* structural constituent of cytoskeleArp2/3 protein complex | YJR066W	K9	K9 vs related control
YJR074W	YJR074W ... MOG1 protein-nucleus import Ran GTPase binding nucleus | YJR075W	K9	K9 vs related control
YJR078W	YJR078W ... BNA2 NAD biosynthesis "tryptophan 2,3-dioxygenase activity"cytoplasm | YJR079W	K9	K9 vs related control
YJR095W	YJR095W ... SFC1 fumarate transport* succinate:fumarate antiporter activmitochondrial inner membrane | YJR096W	K9	K9 vs related control
YJR100C	YJR100C ˜ AIM25 biological process unknown molecular function unknown | Putative protein of unknown function; non-tagged protein is detected in purified mitochondria in high-throughput studies; similar to murine NOR1; null mutant is viable and displays elevated frequency of mitochondrial genome lossYJR101W	K9	K9 vs related control
YJR107W	YJR107W ... YJR107W biological process unknown lipase activity cellular component unknown | YJR108W	K9	K9 vs related control
YJR119C	YJR119C ˜ JHD2 biological process unknown molecular function unknown | JmjC domain family histone demethylase specific for H3-K4 (histone H3 Lys4); removes methyl groups specifically added by Set1p methyltransferase; protein levels regulated by Not4p (E3 ubiquitin ligase) polyubiquitin-mediated degradationYJR120W	K9	K9 vs related control
YJR131W	YJR131W ... MNS1 N-linked glycosylation "mannosyl-oligosaccharide 1,2-alpha-"endoplasmic reticulum | YJR132W	K9	K9 vs related control
YJR133W	YJR133W ... XPT1 purine nucleotide biosynthesis "transferase activity, transferring"cytoplasm | YJR134C	K9	K9 vs related control
YJR135W-A	YJR135W-A ... TIM8 mitochondrial inner membrane p protein transporter activity mitochondrial intermembrane space p | YJR136C	K9	K9 vs related control
YKL005C	YKL005C ... BYE1 negative regulation of transcr transcriptional elongation regulatonucleus | YKL006C-A	Y2189	Y2189 vs related control
YKL007W	YKL007W ... CAP1 barbed-end actin filament capp actin filament binding actin cortical patch* | YKL008C	Y2189	Y2189 vs related control
YKL023C-A	YKL023C-A YKL023C-A YKL065W-A	Y2189	Y2189 vs related control
YKL024C	YKL024C ... URA6 nucleobase, nucleoside, nucleo uridine kinase activity cytoplasm* | YKL025C	Y2189	Y2189 vs related control
YKL046C	YKL046C ... DCW1 cell wall biosynthesis (sensu molecular function unknown membrane fraction* | YKL047W	Y2189	Y2189 vs related control
YKL051W	YKL051W ... SFK1 actin cytoskeleton organizatio molecular function unknown plasma membrane | YKL052C	Y2189	Y2189 vs related control
YKL058W	YKL058W ... TOA2 transcription initiation from general RNA polymerase II transcriptranscription factor TFIIA complex | YKL059C	Y2189	Y2189 vs related control
YKL065C	YKL065C iESR cluster YET1 biological process unknown molecular function unknown endoplasmic reticulum | YKL066W	Y2189	Y2189 vs related control
YKL095W	YKL095W ... YJU2 nuclear mRNA splicing, via spl molecular function unknown nucleus | YKL096C-B	Y2189	Y2189 vs related control
YKL098W	YKL098W ˜ MTC2 biological process unknown molecular function unknown | Protein of unknown function; mtc2 is synthetically sick with cdc13-1YKL099C	Y2189	Y2189 vs related control
YKL105C	YKL105C ... YKL105C biological process unknown molecular function unknown cellular component unknown | YKL106C-A	Y2189	Y2189 vs related control
YKL114C	YKL114C ... APN1 DNA repair* DNA-(apurinic or apyrimidinic site)nucleus* | YKL115C	Y2189	Y2189 vs related control
YKL122C	YKL122C PAC cluster SRP21 protein-ER targeting* signal sequence binding nucleus* | YKL123W	Y2189	Y2189 vs related control
YKL127W	YKL127W ... PGM1 glucose 1-phosphate utilizatio phosphoglucomutase activity cytosol | YKL128C	Y2189	Y2189 vs related control
YKL128C	YKL128C ... PMU1 biological process unknown molecular function unknown cytoplasm* | YKL129C	Y2189	Y2189 vs related control
YKL144C	YKL144C PAC cluster RPC25 transcription from RNA polymer DNA-directed RNA polymerase activitDNA-directed RNA polymerase III com | YKL145W	Y2189	Y2189 vs related control
YKL145W	YKL145W ... RPT1 ubiquitin-dependent protein ca ATPase activity* "proteasome regulatory particle, bas" | YKL146W	Y2189	Y2189 vs related control
YKL152C	YKL152C ... GPM1 glycolysis* phosphoglycerate mutase activity cytosol | YKL153W	Y2189	Y2189 vs related control
YKL153W	YKL153W ... | YKL154W	Y2189	Y2189 vs related control
YKL175W	YKL175W ... ZRT3 zinc ion homeostasis* zinc ion transporter activity vacuolar membrane | YKL176C	Y2189	Y2189 vs related control
YKL181W	YKL181W PAC cluster PRS1 histidine biosynthesis* ribose-phosphate diphosphokinase accytoplasm | YKL182W	Y2189	Y2189 vs related control
YKL182W	YKL182W ... FAS1 fatty acid biosynthesis [acyl-carrier protein] S-malonyltramitochondrion* | YKL183C-A	Y2189	Y2189 vs related control
YKL184W	YKL184W ... SPE1 pantothenate biosynthesis* ornithine decarboxylase activity cytoplasm | YKL185W	Y2189	Y2189 vs related control
YKL186C	YKL186C ... MTR2 poly(A)+ mRNA-nucleus export protein binding nuclear pore | YKL187C	Y2189	Y2189 vs related control
YKL191W	YKL191W ... DPH2 peptidyl-diphthamide biosynthe molecular function unknown cytoplasm | YKL192C	Y2189	Y2189 vs related control
YKL196C	YKL196C ... YKT6 vesicle fusion* v-SNARE activity mitochondrion* | YKL197C	Y2189	Y2189 vs related control
YKL203C	YKL203C ... TOR2 endocytosis* protein binding* mitochondrion* | YKL204W	Y2189	Y2189 vs related control
YKL204W	YKL204W ... EAP1 negative regulation of transla eukaryotic initiation factor 4E binmRNA cap complex | YKL205W	Y2189	Y2189 vs related control
YKL212W	YKL212W ... SAC1 exocytosis* inositol or phosphatidylinositol phmitochondrion* | YKL213C	Y2189	Y2189 vs related control
YKL213C	YKL213C ... DOA1 ubiquitin-dependent protein ca molecular function unknown cytoplasm* | YKL214C	Y2189	Y2189 vs related control
YKL219W	YKL219W ... COS9 biological process unknown molecular function unknown cellular component unknown | YKL220C	Y2189	Y2189 vs related control
YKR002W	YKR002W ... PAP1 mRNA-nucleus export* polynucleotide adenylyltransferase nucleoplasm* | YKR003W	Y2189	Y2189 vs related control
YKR007W	YKR007W ... MEH1 biological process unknown molecular function unknown vacuolar membrane (sensu Fungi) | YKR008W	Y2189	Y2189 vs related control
YKR036C	YKR036C ... CAF4 regulation of transcription, D protein binding mitochondrion* | YKR037C	Y2189	Y2189 vs related control
YKR037C	YKR037C ... SPC34 mitotic spindle organization a structural constituent of cytoskelespindle pole body* | YKR038C	Y2189	Y2189 vs related control
YKR038C	YKR038C ... KAE1 proteolysis and peptidolysis metalloendopeptidase activity* cytoplasm* | YKR039W	Y2189	Y2189 vs related control
YKR042W	YKR042W ... UTH1 mitochondrion organization and molecular function unknown cell wall (sensu Fungi)* | YKR043C	Y2189	Y2189 vs related control
YKR043C	YKR043C PAC cluster YKR043C biological process unknown molecular function unknown cytoplasm* | YKR044W	Y2189	Y2189 vs related control
YKR049C	YKR049C iESR cluster FMP46 biological process unknown molecular function unknown mitochondrion | YKR050W	Y2189	Y2189 vs related control
YKR050W	YKR050W ... TRK2 potassium ion homeostasis potassium ion transporter activity plasma membrane | YKR051W	Y2189	Y2189 vs related control
YKR053C	YKR053C ... YSR3 sphingolipid biosynthesis sphingosine-1-phosphate phosphataseendoplasmic reticulum | YKR054C	Y2189	Y2189 vs related control
YKR074W	YKR074W ˜ AIM29 biological process unknown molecular function unknown | Putative protein of unknown function; epitope-tagged protein localizes to the cytoplasm; YKR074W is not an essential gene; null mutant displays elevated frequency of mitochondrial genome lossYKR075C	Y2189	Y2189 vs related control
YKR084C	YKR084C ... HBS1 protein biosynthesis molecular function unknown cytoplasm | YKR085C	Y2189	Y2189 vs related control
YKR090W	YKR090W ... PXL1 maintenance of cell polarity ( protein binding cytoplasm* | YKR091W	Y2189	Y2189 vs related control
YKR094C	YKR094C RP cluster RPL40B protein biosynthesis* structural constituent of ribosome*mitochondrion* | YKR095W	Y2189	Y2189 vs related control
YLL002W	YLL002W ... RTT109 negative regulation of DNA tra molecular function unknown nucleus | YLL003W	YPS1009	YPS1009 vs related control
YLL004W	YLL004W ... ORC3 DNA replication initiation* DNA replication origin binding pre-replicative complex* | YLL005C	YJM428	YJM428 vs related control
YLL006W	YLL006W ... MMM1 mitochondrion organization and molecular function unknown mitochondrial outer membrane | YLL006W-A	YPS1009	YPS1009 vs related control
YLL010C	YLL010C ... PSR1 response to stress phosphoprotein phosphatase activityplasma membrane | YLL011W	YJM428	YJM428 vs related control
YLL011W	YLL011W PAC cluster SOF1 rRNA modification* snoRNA binding small nucleolar ribonucleoprotein c | YLL012W	YJM428	YJM428 vs related control
YLL021W	YLL021W ... SPA2 actin filament organization* cytoskeletal regulatory protein binbud neck* | YLL022C	YJM428	YJM428 vs related control
YLL021W	YLL021W ... SPA2 actin filament organization* cytoskeletal regulatory protein binbud neck* | YLL022C	YPS1009	YPS1009 vs related control
YLL026W	YLL026W iESR cluster HSP104 response to stress* chaperone binding* cytoplasm* | YLL027W	YPS1009	YPS1009 vs related control
YLL029W	YLL029W ˜ FRA1 biological process unknown molecular function unknown | Protein involved in negative regulation of transcription of iron regulon; forms an iron independent complex with Fra2p, Grx3p, and Grx4p; cytosolic; mutant fails to repress transcription of iron regulon and is defective in spore formationYLL030C	YPS1009	YPS1009 vs related control
YLL036C	YLL036C PAC cluster PRP19 nuclear mRNA splicing, via spl "RNA splicing factor activity, trans"cytoplasm* | YLL037W	YJM428	YJM428 vs related control
YLL039C	YLL039C iESR cluster UBI4 response to stress* protein tag* cytoplasm | YLL040C	YPS1009	YPS1009 vs related control
YLR002C	YLR002C PAC cluster NOC3 rRNA processing* protein binding* nucleus* | YLR003C	YJM428	YJM428 vs related control
YLR003C	YLR003C ˜ PAC cluster CMS1 regulation of DNA replication molecular function unknown | Subunit of U3-containing 90S preribosome processome complex involved in production of 18S rRNA and assembly of small ribosomal subunit; overexpression rescues supressor mutant of mcm10; null mutant is viableYLR004C	YJM428	YJM428 vs related control
YLR006C	YLR006C ... SSK1 osmosensory signaling pathway enzyme activator activity* cytoplasm | YLR007W	YPS1009	YPS1009 vs related control
YLR008C	YLR008C ... PAM18 mitochondrial matrix protein i unfolded protein binding* mitochondrial inner membrane preseq | YLR009W	YJM428	YJM428 vs related control
YLR009W	YLR009W PAC cluster RLP24 ribosomal large subunit biogen molecular function unknown nucleolus | YLR010C	YJM428	YJM428 vs related control
YLR017W	YLR017W PAC cluster MEU1 glutamate biosynthesis* S-methyl-5-thioadenosine phosphorylcytoplasm | YLR018C	YPS1009	YPS1009 vs related control
YLR021W	YLR021W ˜ IRC25 biological process unknown molecular function unknown | Component of a heterodimeric Poc4p-Irc25p chaperone involved in assembly of alpha subunits into the 20S proteasome; may regulate formation of proteasome isoforms with alternative subunits under different conditionsYLR022C	YJM428	YJM428 vs related control
YLR021W	YLR021W ˜ IRC25 biological process unknown molecular function unknown | Component of a heterodimeric Poc4p-Irc25p chaperone involved in assembly of alpha subunits into the 20S proteasome; may regulate formation of proteasome isoforms with alternative subunits under different conditionsYLR022C	YPS1009	YPS1009 vs related control
YLR022C	YLR022C ... SDO1 35S primary transcript process molecular function unknown cytoplasm* | YLR023C	YJM428	YJM428 vs related control
YLR025W	YLR025W ... SNF7 late endosome to vacuole trans molecular function unknown cytoplasm* | YLR026C	YJM428	YJM428 vs related control
YLR028C	YLR028C ... ADE16 aerobic respiration* IMP cyclohydrolase activity* cytosol | YLR029C	YPS1009	YPS1009 vs related control
YLR029C	YLR029C RP cluster RPL15A protein biosynthesis structural constituent of ribosome*cytosolic large ribosomal subunit ( | YLR030W	YJM428	YJM428 vs related control
YLR029C	YLR029C RP cluster RPL15A protein biosynthesis structural constituent of ribosome*cytosolic large ribosomal subunit ( | YLR030W	YPS1009	YPS1009 vs related control
YLR033W	YLR033W ... RSC58 chromatin remodeling molecular function unknown RSC complex | YLR034C	YJM428	YJM428 vs related control
YLR036C	YLR036C ... YLR036C biological process unknown molecular function unknown cellular component unknown | YLR037C	YPS1009	YPS1009 vs related control
YLR044C	YLR044C PAC cluster PDC1 pyruvate metabolism* pyruvate decarboxylase activity cytoplasm* | YLR045C	YJM428	YJM428 vs related control
YLR044C	YLR044C PAC cluster PDC1 pyruvate metabolism* pyruvate decarboxylase activity cytoplasm* | YLR045C	YPS1009	YPS1009 vs related control
YLR048W	YLR048W RP cluster RPS0B protein biosynthesis* structural constituent of ribosome cytosolic small ribosomal subunit ( | YLR049C	YJM428	YJM428 vs related control
YLR051C	YLR051C ˜ PAC cluster FCF2 biological process unknown molecular function unknown | Essential nucleolar protein involved in the early steps of 35S rRNA processing; interacts with Faf1p; member of a transcriptionally co-regulated set of genes called the RRB regulonYLR052W	YPS1009	YPS1009 vs related control
YLR052W	YLR052W ... IES3 chromatin remodeling molecular function unknown nucleus* | YLR053C	YJM428	YJM428 vs related control
YLR052W	YLR052W ... IES3 chromatin remodeling molecular function unknown nucleus* | YLR053C	YPS1009	YPS1009 vs related control
YLR061W	YLR061W RP cluster RPL22A protein biosynthesis structural constituent of ribosome cytosolic large ribosomal subunit ( | YLR062C	YJM428	YJM428 vs related control
YLR061W	YLR061W RP cluster RPL22A protein biosynthesis structural constituent of ribosome cytosolic large ribosomal subunit ( | YLR062C	YPS1009	YPS1009 vs related control
YLR065C	YLR065C PAC cluster YLR065C biological process unknown molecular function unknown cellular component unknown | YLR066W	YJM428	YJM428 vs related control
YLR067C	YLR067C ... PET309 protein biosynthesis* translation regulator activity integral to membrane* | YLR068W	YJM428	YJM428 vs related control
YLR068W	YLR068W ... FYV7 processing of 20S pre-rRNA molecular function unknown nucleus* | YLR069C	YJM428	YJM428 vs related control
YLR068W	YLR068W ... FYV7 processing of 20S pre-rRNA molecular function unknown nucleus* | YLR069C	YPS1009	YPS1009 vs related control
YLR074C	YLR074C PAC cluster BUD20 bud site selection molecular function unknown nucleus | YLR075W	YJM428	YJM428 vs related control
YLR075W	YLR075W RP cluster RPL10 protein biosynthesis* structural constituent of ribosome cytosolic large ribosomal subunit ( | YLR076C	YJM428	YJM428 vs related control
YLR075W	YLR075W RP cluster RPL10 protein biosynthesis* structural constituent of ribosome cytosolic large ribosomal subunit ( | YLR076C	YPS1009	YPS1009 vs related control
YLR077W	YLR077W ... FMP25 biological process unknown molecular function unknown mitochondrion | YLR078C	YJM428	YJM428 vs related control
YLR077W	YLR077W ... FMP25 biological process unknown molecular function unknown mitochondrion | YLR078C	YPS1009	YPS1009 vs related control
YLR082C	YLR082C ... SRL2 nucleobase, nucleoside, nucleo molecular function unknown cytoplasm* | YLR083C	YJM428	YJM428 vs related control
YLR082C	YLR082C ... SRL2 nucleobase, nucleoside, nucleo molecular function unknown cytoplasm* | YLR083C	YPS1009	YPS1009 vs related control
YLR086W	YLR086W ... SMC4 mitotic sister chromatid segre ATPase activity nuclear condensin complex | YLR087C	YPS1009	YPS1009 vs related control
YLR095C	YLR095C ... IOC2 chromatin remodeling protein binding ISW1 complex | YLR096W	YPS1009	YPS1009 vs related control
YLR103C	YLR103C ... CDC45 DNA replication initiation* DNA binding pre-replicative complex* | YLR104W	YPS1009	YPS1009 vs related control
YLR104W	YLR104W ... YLR104W biological process unknown molecular function unknown cellular component unknown | YLR105C	YPS1009	YPS1009 vs related control
YLR105C	YLR105C ... SEN2 tRNA splicing tRNA-intron endonuclease activity mitochondrial outer membrane* | YLR106C	YPS1009	YPS1009 vs related control
YLR106C	YLR106C ... MDN1 rRNA processing* ATPase activity nucleus* | YLR107W	YJM428	YJM428 vs related control
YLR107W	YLR107W ... REX3 RNA processing 3'-5' exonuclease activity cytoplasm* | YLR108C	YPS1009	YPS1009 vs related control
YLR110C	YLR110C ... CCW12 cell wall organization and bio molecular function unknown cell wall (sensu Fungi) | YLR111W	YJM428	YJM428 vs related control
YLR113W	YLR113W ... HOG1 protein amino acid phosphoryla MAP kinase activity cytoplasm* | YLR114C	YJM428	YJM428 vs related control
YLR113W	YLR113W ... HOG1 protein amino acid phosphoryla MAP kinase activity cytoplasm* | YLR114C	YPS1009	YPS1009 vs related control
YLR117C	YLR117C ... CLF1 nuclear mRNA splicing, via spl molecular function unknown spliceosome complex* | YLR118C	YJM428	YJM428 vs related control
YLR117C	YLR117C ... CLF1 nuclear mRNA splicing, via spl molecular function unknown spliceosome complex* | YLR118C	YPS1009	YPS1009 vs related control
YLR129W	YLR129W PAC cluster DIP2 processing of 20S pre-rRNA snoRNA binding small nucleolar ribonucleoprotein c | YLR130C	YJM428	YJM428 vs related control
YLR130C	YLR130C ... ZRT2 low-affinity zinc ion transpor low-affinity zinc ion transporter aplasma membrane | YLR131C	YJM428	YJM428 vs related control
YLR131C	YLR131C ... ACE2 G1-specific transcription in m transcriptional activator activity nucleus* | YLR132C	YPS1009	YPS1009 vs related control
YLR132C	YLR132C ... YLR132C nuclear mRNA splicing, via spl molecular function unknown cytoplasm* | YLR133W	YJM428	YJM428 vs related control
YLR132C	YLR132C ... YLR132C nuclear mRNA splicing, via spl molecular function unknown cytoplasm* | YLR133W	YPS1009	YPS1009 vs related control
YLR133W	YLR133W ... CKI1 phosphatidylcholine biosynthes choline kinase activity cytosol | YLR134W	YPS1009	YPS1009 vs related control
YLR134W	YLR134W PAC cluster PDC5 pyruvate metabolism* pyruvate decarboxylase activity cytoplasm* | YLR135W	YJM428	YJM428 vs related control
YLR135W	YLR135W ... SLX4 DNA replication* 5'-flap endonuclease activity nucleus | YLR136C	YPS1009	YPS1009 vs related control
YLR137W	YLR137W ... YLR137W biological process unknown molecular function unknown cellular component unknown | YLR138W	YPS1009	YPS1009 vs related control
YLR141W	YLR141W ... RRN5 transcription from RNA polymer RNA polymerase I transcription factRNA polymerase I upstream activatin | YLR142W	YJM428	YJM428 vs related control
YLR147C	YLR147C ... SMD3 nuclear mRNA splicing, via spl "RNA splicing factor activity, trans"U4/U6 x U5 tri-snRNP complex* | YLR148W	YJM428	YJM428 vs related control
YLR147C	YLR147C ... SMD3 nuclear mRNA splicing, via spl "RNA splicing factor activity, trans"U4/U6 x U5 tri-snRNP complex* | YLR148W	YPS1009	YPS1009 vs related control
YLR150W	YLR150W PAC cluster STM1 telomere maintenance* DNA binding* cytoplasm* | YLR151C	YJM428	YJM428 vs related control
YLR150W	YLR150W PAC cluster STM1 telomere maintenance* DNA binding* cytoplasm* | YLR151C	YPS1009	YPS1009 vs related control
YLR154C	YLR154C ... RNH203 DNA replication ribonuclease H activity cytoplasm* | YLR154C-G	YJM428	YJM428 vs related control
YLR164W	YLR164W ... YLR164W biological process unknown molecular function unknown mitochondrial inner membrane | YLR165C	YPS1009	YPS1009 vs related control
YLR167W	YLR167W RP cluster RPS31 protein biosynthesis* structural constituent of ribosome*cytoplasm* | YLR168C	YJM428	YJM428 vs related control
YLR167W	YLR167W RP cluster RPS31 protein biosynthesis* structural constituent of ribosome*cytoplasm* | YLR168C	YPS1009	YPS1009 vs related control
YLR170C	YLR170C ... APS1 vesicle-mediated transport clathrin binding AP-1 adaptor complex | YLR171W	YJM428	YJM428 vs related control
YLR172C	YLR172C PAC cluster DPH5 peptidyl-diphthamide biosynthe diphthine synthase activity cytoplasm | YLR173W	YJM428	YJM428 vs related control
YLR181C	YLR181C ... VTA1 late endosome to vacuole trans molecular function unknown endosome* | YLR182W	YJM428	YJM428 vs related control
YLR181C	YLR181C ... VTA1 late endosome to vacuole trans molecular function unknown endosome* | YLR182W	YPS1009	YPS1009 vs related control
YLR182W	YLR182W ... SWI6 meiosis* protein binding* cytoplasm* | YLR183C	YJM428	YJM428 vs related control
YLR182W	YLR182W ... SWI6 meiosis* protein binding* cytoplasm* | YLR183C	YPS1009	YPS1009 vs related control
YLR185W	YLR185W RP cluster RPL37A protein biosynthesis structural constituent of ribosome cytosolic large ribosomal subunit ( | YLR186W	YPS1009	YPS1009 vs related control
YLR186W	YLR186W PAC cluster EMG1 35S primary transcript process snoRNA binding cytoplasm* | YLR187W	YJM428	YJM428 vs related control
YLR186W	YLR186W PAC cluster EMG1 35S primary transcript process snoRNA binding cytoplasm* | YLR187W	YPS1009	YPS1009 vs related control
YLR187W	YLR187W ... SKG3 biological process unknown molecular function unknown cytoplasm* | YLR188W	YJM428	YJM428 vs related control
YLR188W	YLR188W ... MDL1 oligopeptide transport ATPase activity* mitochondrial inner membrane | YLR189C	YPS1009	YPS1009 vs related control
YLR190W	YLR190W ... MMR1 mitochondrion inheritance molecular function unknown mitochondrion* | YLR191W	YPS1009	YPS1009 vs related control
YLR192C	YLR192C ... HCR1 protein biosynthesis* translation initiation factor activeukaryotic translation initiation f | YLR193C	YJM428	YJM428 vs related control
YLR192C	YLR192C ... HCR1 protein biosynthesis* translation initiation factor activeukaryotic translation initiation f | YLR193C	YPS1009	YPS1009 vs related control
YLR195C	YLR195C ... NMT1 N-terminal peptidyl-glycine N- glycylpeptide N-tetradecanoyltransfcytosol | YLR196W	YJM428	YJM428 vs related control
YLR195C	YLR195C ... NMT1 N-terminal peptidyl-glycine N- glycylpeptide N-tetradecanoyltransfcytosol | YLR196W	YPS1009	YPS1009 vs related control
YLR198C	YLR198C PAC cluster | YLR199C	YJM428	YJM428 vs related control
YLR200W	YLR200W ... YKE2 protein folding* tubulin binding cytoplasm* | YLR201C	YJM428	YJM428 vs related control
YLR200W	YLR200W ... YKE2 protein folding* tubulin binding cytoplasm* | YLR201C	YPS1009	YPS1009 vs related control
YLR208W	YLR208W ... SEC13 ER to Golgi transport* structural molecule activity cytoplasm* | YLR209C	YJM428	YJM428 vs related control
YLR210W	YLR210W ... CLB4 G2/M transition of mitotic cel cyclin-dependent protein kinase regcytoplasm* | YLR211C	YPS1009	YPS1009 vs related control
YLR212C	YLR212C ... TUB4 mitotic spindle organization a structural constituent of cytoskeleouter plaque of spindle pole body* | YLR213C	YJM428	YJM428 vs related control
YLR221C	YLR221C PAC cluster RSA3 ribosomal large subunit assemb molecular function unknown nucleolus* | YLR222C	YPS1009	YPS1009 vs related control
YLR222C	YLR222C PAC cluster UTP13 processing of 20S pre-rRNA snoRNA binding small nucleolar ribonucleoprotein c | YLR223C	YJM428	YJM428 vs related control
YLR234W	YLR234W ... TOP3 meiotic recombination* DNA topoisomerase type I activity nucleus* | YLR235C	YJM428	YJM428 vs related control
YLR240W	YLR240W ... VPS34 protein amino acid phosphoryla protein kinase activity* membrane fraction | YLR241W	YPS1009	YPS1009 vs related control
YLR254C	YLR254C ... NDL1 biological process unknown molecular function unknown cytoplasm* | YLR255C	YPS1009	YPS1009 vs related control
YLR256W	YLR256W ... HAP1 aerobic respiration* specific RNA polymerase II transcrinucleus | YLR257W	YPS1009	YPS1009 vs related control
YLR259C	YLR259C ... HSP60 protein folding* single-stranded DNA binding mitochondrion* | YLR260W	YPS1009	YPS1009 vs related control
YLR260W	YLR260W ... LCB5 response to heat* D-erythro-sphingosine kinase activimembrane fraction* | YLR261C	YPS1009	YPS1009 vs related control
YLR262C-A	YLR262C-A ... TMA7 biological process unknown molecular function unknown cytoplasm* | Protein of unknown that associates with ribosomes; null mutant exhibits translation defects, altered polyribosome profiles, and resistance to the translation inhibitor anisomcyinYLR263W	YJM428	YJM428 vs related control
YLR262C-A	YLR262C-A ... TMA7 biological process unknown molecular function unknown cytoplasm* | Protein of unknown that associates with ribosomes; null mutant exhibits translation defects, altered polyribosome profiles, and resistance to the translation inhibitor anisomcyinYLR263W	YPS1009	YPS1009 vs related control
YLR265C	YLR265C ... NEJ1 DNA repair* molecular function unknown nucleus | YLR266C	YJM428	YJM428 vs related control
YLR266C	YLR266C ... PDR8 response to stress* DNA binding* nucleus | YLR267W	YJM428	YJM428 vs related control
YLR266C	YLR266C ... PDR8 response to stress* DNA binding* nucleus | YLR267W	YPS1009	YPS1009 vs related control
YLR268W	YLR268W ... SEC22 ER to Golgi transport* v-SNARE activity endoplasmic reticulum* | YLR269C	YJM428	YJM428 vs related control
YLR272C	YLR272C ... YCS4 mitotic chromosome condensatio molecular function unknown nuclear condensin complex | YLR273C	YPS1009	YPS1009 vs related control
YLR275W	YLR275W ... SMD2 nuclear mRNA splicing, via spl "RNA splicing factor activity, trans"U4/U6 x U5 tri-snRNP complex | YLR276C	YPS1009	YPS1009 vs related control
YLR276C	YLR276C PAC cluster DBP9 35S primary transcript process ATP-dependent RNA helicase activitynucleolus | YLR277C	YJM428	YJM428 vs related control
YLR276C	YLR276C PAC cluster DBP9 35S primary transcript process ATP-dependent RNA helicase activitynucleolus | YLR277C	YPS1009	YPS1009 vs related control
YLR285W	YLR285W ... NNT1 chromatin silencing at ribosom nicotinamide N-methyltransferase accytoplasm | YLR286C	YPS1009	YPS1009 vs related control
YLR288C	YLR288C ... MEC3 chromatin silencing at telomer DNA binding nucleus | YLR289W	YJM428	YJM428 vs related control
YLR288C	YLR288C ... MEC3 chromatin silencing at telomer DNA binding nucleus | YLR289W	YPS1009	YPS1009 vs related control
YLR291C	YLR291C PAC cluster GCD7 translational initiation translation initiation factor activmitochondrion* | YLR292C	YJM428	YJM428 vs related control
YLR299W	YLR299W iESR cluster ECM38 glutathione catabolism protein-glutamine gamma-glutamyltraintracellular | YLR300W	YPS1009	YPS1009 vs related control
YLR304C	YLR304C ... ACO1 mitochondrial genome maintenan aconitate hydratase activity cytosol* | YLR305C	YJM428	YJM428 vs related control
YLR305C	YLR305C ... STT4 actin cytoskeleton organizatio 1-phosphatidylinositol 4-kinase actmitochondrion* | YLR306W	YJM428	YJM428 vs related control
YLR306W	YLR306W ... UBC12 protein monoubiquitination* ubiquitin conjugating enzyme activicellular component unknown | YLR307C-A	YJM428	YJM428 vs related control
YLR309C	YLR309C ... IMH1 vesicle-mediated transport molecular function unknown cytosol* | YLR310C	YJM428	YJM428 vs related control
YLR309C	YLR309C ... IMH1 vesicle-mediated transport molecular function unknown cytosol* | YLR310C	YPS1009	YPS1009 vs related control
YLR310C	YLR310C ... CDC25 regulation of cell cycle* Ras guanyl-nucleotide exchange factcytoplasm* | YLR311C	YPS1009	YPS1009 vs related control
YLR314C	YLR314C ... CDC3 cell wall organization and bio structural constituent of cytoskeleprospore membrane* | YLR315W	YJM428	YJM428 vs related control
YLR316C	YLR316C ... TAD3 tRNA modification tRNA specific adenosine deaminase acytoplasm* | YLR317W	YPS1009	YPS1009 vs related control
YLR319C	YLR319C ... BUD6 actin filament organization* cytoskeletal regulatory protein binactin cap* | YLR320W	YPS1009	YPS1009 vs related control
YLR323C	YLR323C ... CWC24 biological process unknown molecular function unknown spliceosome complex | YLR324W	YJM428	YJM428 vs related control
YLR323C	YLR323C ... CWC24 biological process unknown molecular function unknown spliceosome complex | YLR324W	YPS1009	YPS1009 vs related control
YLR326W	YLR326W ... YLR326W biological process unknown molecular function unknown cellular component unknown | YLR327C	YPS1009	YPS1009 vs related control
YLR335W	YLR335W ... NUP2 mRNA-nucleus export* structural molecule activity mitochondrion* | YLR336C	YJM428	YJM428 vs related control
YLR335W	YLR335W ... NUP2 mRNA-nucleus export* structural molecule activity mitochondrion* | YLR336C	YPS1009	YPS1009 vs related control
YLR340W	YLR340W PAC cluster RPP0 translational elongation* structural constituent of ribosome cytosolic large ribosomal subunit ( | YLR341W	YJM428	YJM428 vs related control
YLR340W	YLR340W PAC cluster RPP0 translational elongation* structural constituent of ribosome cytosolic large ribosomal subunit ( | YLR341W	YPS1009	YPS1009 vs related control
YLR345W	YLR345W iESR cluster YLR345W biological process unknown molecular function unknown cytoplasm | YLR346C	YPS1009	YPS1009 vs related control
YLR346C	YLR346C ... YLR346C biological process unknown molecular function unknown mitochondrion | YLR347C	YJM428	YJM428 vs related control
YLR347W-A	YLR347W-A ˜ Dubious Dubious open reading frame unlikely to encode a protein, based on available experimental and comparative sequence data; overlaps the verified ORF KAP95/YLR347CYLR364C-A	YJM428	YJM428 vs related control
YLR351C	YLR351C ... NIT3 biological process unknown "hydrolase activity, acting on carbo"cytoplasm* | YLR352W	YPS1009	YPS1009 vs related control
YLR352W	YLR352W ... YLR352W biological process unknown molecular function unknown cellular component unknown | YLR353W	YPS1009	YPS1009 vs related control
YLR363W-A	YLR363W-A ... YLR363W-A biological process unknown molecular function unknown nucleus | YLR364W	YPS1009	YPS1009 vs related control
YLR373C	YLR373C ... VID22 vacuolar protein catabolism molecular function unknown integral to plasma membrane | YLR374C	YPS1009	YPS1009 vs related control
YLR375W	YLR375W ... STP3 biological process unknown molecular function unknown nucleus | YLR376C	YPS1009	YPS1009 vs related control
YLR383W	YLR383W ... SMC6 DNA repair* molecular function unknown nucleus* | YLR384C	YPS1009	YPS1009 vs related control
YLR385C	YLR385C ... SWC7 chromatin remodeling molecular function unknown nucleus* | YLR386W	YJM428	YJM428 vs related control
YLR385C	YLR385C ... SWC7 chromatin remodeling molecular function unknown nucleus* | YLR386W	YPS1009	YPS1009 vs related control
YLR394W	YLR394W ... CST9 synaptonemal complex formation DNA binding nuclear chromosome | YLR395C	YPS1009	YPS1009 vs related control
YLR397C	YLR397C PAC cluster AFG2 response to drug ATPase activity intracellular | YLR398C	YJM428	YJM428 vs related control
YLR398C	YLR398C ... SKI2 mRNA catabolism* RNA helicase activity* cytoplasm* | YLR399C	YPS1009	YPS1009 vs related control
YLR406C	YLR406C ... RPL31B protein biosynthesis structural constituent of ribosome cytosolic large ribosomal subunit ( | YLR406C-A	YPS1009	YPS1009 vs related control
YLR407W	YLR407W ... YLR407W biological process unknown molecular function unknown cellular component unknown | YLR408C	YJM428	YJM428 vs related control
YLR409C	YLR409C PAC cluster UTP21 35S primary transcript process snoRNA binding nucleus* | YLR410W	YJM428	YJM428 vs related control
YLR409C	YLR409C PAC cluster UTP21 35S primary transcript process snoRNA binding nucleus* | YLR410W	YPS1009	YPS1009 vs related control
YLR410W	YLR410W ... VIP1 actin cytoskeleton organizatio molecular function unknown cytoplasm | YLR411W	YJM428	YJM428 vs related control
YLR413W	YLR413W PAC cluster YLR413W biological process unknown molecular function unknown cellular component unknown | YLR414C	YJM428	YJM428 vs related control
YLR420W	YLR420W ... URA4 pyrimidine nucleotide biosynth dihydroorotase activity cytoplasm* | YLR421C	YPS1009	YPS1009 vs related control
YLR421C	YLR421C ... RPN13 proteolysis and peptidolysis endopeptidase activity "proteasome regulatory particle, lid" | YLR422W	YPS1009	YPS1009 vs related control
YLR424W	YLR424W ... SPP382 nuclear mRNA splicing, via spl RNA binding cytoplasm* | YLR425W	YPS1009	YPS1009 vs related control
YLR427W	YLR427W ... MAG2 DNA dealkylation alkylbase DNA N-glycosylase activitcytoplasm | YLR428C	YPS1009	YPS1009 vs related control
YLR429W	YLR429W ... CRN1 actin filament organization* "protein binding, bridging*" actin cortical patch | YLR430W	YPS1009	YPS1009 vs related control
YLR433C	YLR433C PAC cluster CNA1 cell wall organization and bio calcium-dependent protein serine/thcytoplasm* | YLR434C	YJM428	YJM428 vs related control
YLR435W	YLR435W PAC cluster TSR2 processing of 20S pre-rRNA molecular function unknown cytoplasm* | YLR436C	YJM428	YJM428 vs related control
YLR435W	YLR435W PAC cluster TSR2 processing of 20S pre-rRNA molecular function unknown cytoplasm* | YLR436C	YPS1009	YPS1009 vs related control
YLR437C	YLR437C ˜ DIF1 biological process unknown molecular function unknown | Protein that regulates the nuclear localization of ribonucleotide reductase Rnr2p and Rnr4p subunits; phosphorylated by Dun1p in response to DNA damage and degraded; N-terminal half has similarity to S. pombe Spd1 proteinYLR438C-A	YJM428	YJM428 vs related control
YLR438C-A	YLR438C-A ... LSM3 nuclear mRNA splicing, via spl RNA binding nucleolus* | YLR438W	YPS1009	YPS1009 vs related control
YLR440C	YLR440C ... SEC39 secretory pathway molecular function unknown endoplasmic reticulum* | YLR441C	YPS1009	YPS1009 vs related control
YLR447C	YLR447C PAC cluster VMA6 vacuolar acidification* hydrogen-transporting ATPase activivacuolar membrane* | YLR448W	YJM428	YJM428 vs related control
YLR448W	YLR448W RP cluster RPL6B protein biosynthesis* structural constituent of ribosome*cytosolic large ribosomal subunit ( | YLR449W	YJM428	YJM428 vs related control
YLR448W	YLR448W RP cluster RPL6B protein biosynthesis* structural constituent of ribosome*cytosolic large ribosomal subunit ( | YLR449W	YPS1009	YPS1009 vs related control
YLR450W	YLR450W ... HMG2 ergosterol biosynthesis hydroxymethylglutaryl-CoA reductaseendoplasmic reticulum membrane* | YLR451W	YPS1009	YPS1009 vs related control
YLR454W	YLR454W ... FMP27 biological process unknown molecular function unknown mitochondrion | YLR455W	YPS1009	YPS1009 vs related control
YLR457C	YLR457C ... NBP1 biological process unknown molecular function unknown nucleus | YLR458W	YPS1009	YPS1009 vs related control
YPL003W	YPL003W ... ULA1 protein neddylation NEDD8 activating enzyme activity cellular component unknown | YPL004C	YJM428	YJM428 vs related control
YPL009C	YPL009C ... YPL009C biological process unknown molecular function unknown cytoplasm | YPL010W	YJM428	YJM428 vs related control
YPL012W	YPL012W ... RRP12 processing of 20S pre-rRNA* molecular function unknown nucleus* | YPL013C	YJM428	YJM428 vs related control
YPL043W	YPL043W PAC cluster NOP4 rRNA processing RNA binding nucleolus | YPL044C	YJM428	YJM428 vs related control
YPL055C	YPL055C ... LGE1 meiosis* molecular function unknown nucleus | YPL056C	YJM428	YJM428 vs related control
YPL056C	YPL056C ... YPL056C biological process unknown molecular function unknown cellular component unknown | YPL057C	YJM428	YJM428 vs related control
YPL061W	YPL061W ... ALD6 acetate biosynthesis aldehyde dehydrogenase activity cytoplasm* | YPL062W	YJM428	YJM428 vs related control
YPL065W	YPL065W ... VPS28 protein-vacuolar targeting* molecular function unknown endosome* | YPL066W	YJM428	YJM428 vs related control
YPL068C	YPL068C ... YPL068C biological process unknown molecular function unknown nucleus | YPL069C	YJM428	YJM428 vs related control
YPL081W	YPL081W RP cluster RPS9A protein biosynthesis* structural constituent of ribosome cytoplasm* | YPL082C	YJM428	YJM428 vs related control
YPL082C	YPL082C ... MOT1 regulation of transcription fr ATPase activity mitochondrion* | YPL083C	YJM428	YJM428 vs related control
YPL089C	YPL089C ... RLM1 cell wall organization and bio DNA binding* nucleus | YPL090C	YJM428	YJM428 vs related control
YPL090C	YPL090C RP cluster RPS6A protein biosynthesis structural constituent of ribosome cytosolic small ribosomal subunit ( | YPL091W	YJM428	YJM428 vs related control
YPL093W	YPL093W ... NOG1 ribosome-nucleus export GTPase activity nucleolus | YPL094C	YJM428	YJM428 vs related control
YPL096W	YPL096W ... PNG1 misfolded or incompletely synt peptide-N4-(N-acetyl-beta-glucosaminucleus* | YPL097W	YJM428	YJM428 vs related control
YPL112C	YPL112C ... PEX25 peroxisome organization and bi molecular function unknown peroxisomal membrane | YPL113C	YJM428	YJM428 vs related control
YPL114W	YPL114W ... | YPL115C	YJM428	YJM428 vs related control
YPL139C	YPL139C ... UME1 regulation of meiosis transcription corepressor activity nucleus | YPL140C	YJM428	YJM428 vs related control
YPL146C	YPL146C PAC cluster NOP53 ribosome biogenesis* protein binding nucleus* | YPL147W	YJM428	YJM428 vs related control
YPL170W	YPL170W ... DAP1 sterol metabolism heme binding membrane | YPL171C	YJM428	YJM428 vs related control
YPL197C	YPL197C ... | YPL198W	YJM428	YJM428 vs related control
YPL198W	YPL198W RP cluster RPL7B protein biosynthesis structural constituent of ribosome cytosolic large ribosomal subunit ( | YPL199C	YJM428	YJM428 vs related control
YPL199C	YPL199C ... YPL199C biological process unknown molecular function unknown cytoplasm | YPL200W	YJM428	YJM428 vs related control
YPL210C	YPL210C ... SRP72 protein-ER targeting* signal sequence binding signal recognition particle (sensu | YPL211W	YJM428	YJM428 vs related control
YPL217C	YPL217C PAC cluster BMS1 rRNA processing* GTP binding cytoplasm* | YPL218W	YJM428	YJM428 vs related control
YPL231W	YPL231W ... FAS2 fatty acid biosynthesis* phosphopantetheinyltransferase actimitochondrion* | YPL232W	YJM428	YJM428 vs related control
YPL233W	YPL233W ... NSL1 chromosome segregation molecular function unknown kinetochore* | YPL234C	YJM428	YJM428 vs related control
YPL241C	YPL241C ... CIN2 microtubule-based process molecular function unknown cellular component unknown | YPL242C	YJM428	YJM428 vs related control
YPL250C	YPL250C ... ICY2 biological process unknown molecular function unknown cellular component unknown | YPL251W	YJM428	YJM428 vs related control
YPL252C	YPL252C ... YAH1 heme a biosynthesis electron carrier activity mitochondrial matrix | YPL253C	YJM428	YJM428 vs related control
YPL267W	YPL267W ... ACM1 biological process unknown molecular function unknown cellular component unknown | YPL268W	YJM428	YJM428 vs related control
YPL268W	YPL268W ... PLC1 pseudohyphal growth* phosphoinositide phospholipase C acnucleus* | YPL269W	YJM428	YJM428 vs related control
YPR015C	YPR015C ... YPR015C biological process unknown molecular function unknown cellular component unknown | YPR016C	YJM428	YJM428 vs related control
YPR020W	YPR020W ... ATP20 ATP synthesis coupled proton t structural molecule activity proton-transporting ATP synthase co | YPR021C	YJM428	YJM428 vs related control
YPR025C	YPR025C ... CCL1 transcription initiation from general RNA polymerase II transcripmitochondrion* | YPR026W	YJM428	YJM428 vs related control
YPR035W	YPR035W ... GLN1 nitrogen compound metabolism* glutamate-ammonia ligase activity cytoplasm | YPR036W	YJM428	YJM428 vs related control
YPR036W	YPR036W ... VMA13 vacuolar acidification hydrogen-transporting ATPase activivacuolar membrane (sensu Fungi)* | YPR036W-A	YJM428	YJM428 vs related control
YPR040W	YPR040W ... TIP41 signal transduction molecular function unknown cytoplasm* | YPR041W	YJM428	YJM428 vs related control
YPR041W	YPR041W PAC cluster TIF5 regulation of translational in translation initiation factor activcytosolic small ribosomal subunit ( | YPR042C	YJM428	YJM428 vs related control
YPR056W	YPR056W ... TFB4 transcription initiation from general RNA polymerase II transcriptranscription factor TFIIH complex | YPR057W	YJM428	YJM428 vs related control
YPR060C	YPR060C PAC cluster ARO7 aromatic amino acid family bio chorismate mutase activity cytoplasm* | YPR061C	YJM428	YJM428 vs related control
YPR069C	YPR069C ... SPE3 pantothenate biosynthesis* spermidine synthase activity cytoplasm* | YPR070W	YJM428	YJM428 vs related control
YPR091C	YPR091C ... YPR091C biological process unknown molecular function unknown endoplasmic reticulum | YPR092W	YJM428	YJM428 vs related control
YPR102C	YPR102C RP cluster RPL11A protein biosynthesis* structural constituent of ribosome cytosolic large ribosomal subunit ( | YPR103W	YJM428	YJM428 vs related control
YPR107C	YPR107C ... YTH1 mRNA polyadenylylation* RNA binding mRNA cleavage and polyadenylation s | YPR108W	YJM428	YJM428 vs related control
YPR114W	YPR114W ... YPR114W biological process unknown molecular function unknown endoplasmic reticulum | YPR115W	YJM428	YJM428 vs related control
YPR123C	YPR123C ... | YPR124W	YJM428	YJM428 vs related control
YPR126C	YPR126C ... | YPR127W	YJM428	YJM428 vs related control
YPR129W	YPR129W ... SCD6 RNA metabolism RNA binding cytoplasm | YPR130C	YJM428	YJM428 vs related control
YPR134W	YPR134W ... MSS18 Group I intron splicing molecular function unknown mitochondrion | YPR135W	YJM428	YJM428 vs related control
YPR135W	YPR135W ... CTF4 DNA repair* DNA binding nucleus* | YPR136C	YJM428	YJM428 vs related control
YPR137W	YPR137W PAC cluster RRP9 rRNA modification* snoRNA binding small nucleolar ribonucleoprotein c | YPR138C	YJM428	YJM428 vs related control
YPR142C	YPR142C PAC cluster | YPR143W	YJM428	YJM428 vs related control
YPR143W	YPR143W PAC cluster RRP15 processing of 27S pre-rRNA molecular function unknown nucleus* | YPR144C	YJM428	YJM428 vs related control
YPR148C	YPR148C ... YPR148C biological process unknown molecular function unknown cytoplasm | YPR149W	YJM428	YJM428 vs related control
YPR152C	YPR152C ˜ URN1 biological process unknown molecular function unknown | Putative protein of unknown function containing WW and FF domains; overexpression causes accumulation of cells in G1 phaseYPR153W	YJM428	YJM428 vs related control
YPR154W	YPR154W ... PIN3 actin cytoskeleton organizatio molecular function unknown cytoplasm* | YPR155C	YJM428	YJM428 vs related control
YPR161C	YPR161C ... SGV1 protein amino acid phosphoryla cyclin-dependent protein kinase actnucleus | YPR162C	YJM428	YJM428 vs related control
YPR163C	YPR163C PAC cluster TIF3 translational initiation translation initiation factor activribosome | YPR164W	YJM428	YJM428 vs related control
YPR174C	YPR174C ... YPR174C biological process unknown molecular function unknown nuclear membrane* | YPR175W	YJM428	YJM428 vs related control
YPR175W	YPR175W ... DPB2 nucleotide-excision repair* epsilon DNA polymerase activity cytoplasm* | YPR176C	YJM428	YJM428 vs related control
YPR190C	YPR190C PAC cluster RPC82 transcription from RNA polymer DNA-directed RNA polymerase activitDNA-directed RNA polymerase III com | YPR191W	YJM428	YJM428 vs related control
YHL002W	YHL002W ... HSE1 protein-vacuolar targeting protein binding endosome | YHL003C	YPS163_Chr8-4n and/or T73_Chr8-4n	aneuploid vs. isogenic euploid strain pairs
YHL006W-A	YHL006W-A | YHL007C	YPS163_Chr8-4n and/or T73_Chr8-4n	aneuploid vs. isogenic euploid strain pairs
YHL008C	YHL008C ... YHL008C biological process unknown transporter activity vacuole (sensu Fungi) | YHL009C	YPS163_Chr8-4n and/or T73_Chr8-4n	aneuploid vs. isogenic euploid strain pairs
YHL010C	YHL010C … ETP1 biological process unknown nuclear localization sequence | Putative protein of unknown function that is required for growth on ethanol; contains a zinc finger region and has homology to human BRAP2, which is a cytoplasmic protein that binds nuclear localization sequencesYHL011C	YPS163_Chr8-4n and/or T73_Chr8-4n	aneuploid vs. isogenic euploid strain pairs
YHL013C	YHL013C … PAC cluster OTU2 biological process unknown molecular function unknown | Protein of unknown function that may interact with ribosomes, based on co-purification experiments; member of the ovarian tumor-like (OTU) superfamily of predicted cysteine proteases; shows cytoplasmic localizationYHL014C	YPS163_Chr8-4n and/or T73_Chr8-4n	aneuploid vs. isogenic euploid strain pairs
YHL015W	YHL015W ... RPS20 protein biosynthesis structural constituent of ribosome cytosolic small ribosomal subunit ( | YHL015W-A	YPS163_Chr8-4n and/or T73_Chr8-4n	aneuploid vs. isogenic euploid strain pairs
YHL019C	YHL019C ... APM2 vesicle-mediated transport clathrin binding AP-1 adaptor complex | YHL019W-A	YPS163_Chr8-4n and/or T73_Chr8-4n	aneuploid vs. isogenic euploid strain pairs
YHL020C	YHL020C ... OPI1 positive regulation of transcr transcription corepressor activity nucleus | YHL021C	YPS163_Chr8-4n and/or T73_Chr8-4n	aneuploid vs. isogenic euploid strain pairs
YHL022C	YHL022C ... SPO11 meiotic DNA double-strand brea "endodeoxyribonuclease activity, pro"nuclear chromosome | YHL023C	YPS163_Chr8-4n and/or T73_Chr8-4n	aneuploid vs. isogenic euploid strain pairs
YHL023C	YHL023C ... RMD11 biological process unknown molecular function unknown cellular component unknown | YHL024W	YPS163_Chr8-4n and/or T73_Chr8-4n	aneuploid vs. isogenic euploid strain pairs
YHL028W	YHL028W ... WSC4 cell wall organization and bio transmembrane receptor activity endoplasmic reticulum membrane* | YHL029C	YPS163_Chr8-4n and/or T73_Chr8-4n	aneuploid vs. isogenic euploid strain pairs
YHL033C	YHL033C RP cluster RPL8A protein biosynthesis structural constituent of ribosome cytosolic large ribosomal subunit ( | YHL034C	YPS163_Chr8-4n and/or T73_Chr8-4n	aneuploid vs. isogenic euploid strain pairs
YHL035C	YHL035C ... VMR1 transport "ATPase activity, coupled to transme"mitochondrion* | YHL036W	YPS163_Chr8-4n and/or T73_Chr8-4n	aneuploid vs. isogenic euploid strain pairs
YHL038C	YHL038C ... CBP2 Group I intron splicing "RNA splicing factor activity, trans"mitochondrion | YHL039W	YPS163_Chr8-4n and/or T73_Chr8-4n	aneuploid vs. isogenic euploid strain pairs
YHL040C	YHL040C ... ARN1 iron-siderophore transport siderophore-iron transporter activiendosome* | YHL041W	YPS163_Chr8-4n and/or T73_Chr8-4n	aneuploid vs. isogenic euploid strain pairs
YHL047C	YHL047C ... ARN2 iron ion homeostasis* siderophore-iron transporter activiplasma membrane* | YHL048C-A	YPS163_Chr8-4n and/or T73_Chr8-4n	aneuploid vs. isogenic euploid strain pairs
YHL048W	YHL048W ... COS8 response to unfolded protein molecular function unknown nuclear membrane | YHL049C	YPS163_Chr8-4n and/or T73_Chr8-4n	aneuploid vs. isogenic euploid strain pairs
YHR002W	YHR002W ... LEU5 coenzyme A transport coenzyme A transporter activity mitochondrial inner membrane | YHR003C	YPS163_Chr8-4n and/or T73_Chr8-4n	aneuploid vs. isogenic euploid strain pairs
YHR005C	YHR005C ... GPA1 signal transduction during con GTPase activity plasma membrane* | YHR005C-A	YPS163_Chr8-4n and/or T73_Chr8-4n	aneuploid vs. isogenic euploid strain pairs
YHR009C	YHR009C ... YHR009C biological process unknown molecular function unknown cytoplasm | YHR010W	YPS163_Chr8-4n and/or T73_Chr8-4n	aneuploid vs. isogenic euploid strain pairs
YHR016C	YHR016C ... YSC84 endocytosis* molecular function unknown actin cortical patch | YHR017W	YPS163_Chr8-4n and/or T73_Chr8-4n	aneuploid vs. isogenic euploid strain pairs
YHR017W	YHR017W ... YSC83 biological process unknown molecular function unknown mitochondrion | YHR018C	YPS163_Chr8-4n and/or T73_Chr8-4n	aneuploid vs. isogenic euploid strain pairs
YHR018C	YHR018C ... ARG4 arginine biosynthesis argininosuccinate lyase activity cytosol | YHR019C	YPS163_Chr8-4n and/or T73_Chr8-4n	aneuploid vs. isogenic euploid strain pairs
YHR021W-A	YHR021W-A ... ECM12 cell wall organization and bio molecular function unknown cellular component unknown | YHR022C	YPS163_Chr8-4n and/or T73_Chr8-4n	aneuploid vs. isogenic euploid strain pairs
YHR023W	YHR023W ... MYO1 response to osmotic stress* microfilament motor activity contractile ring (sensu Saccharomyc | YHR024C	YPS163_Chr8-4n and/or T73_Chr8-4n	aneuploid vs. isogenic euploid strain pairs
YHR024C	YHR024C ... MAS2 mitochondrial protein processi mitochondrial processing peptidase mitochondrial processing peptidase | YHR025W	YPS163_Chr8-4n and/or T73_Chr8-4n	aneuploid vs. isogenic euploid strain pairs
YHR028C	YHR028C ... DAP2 protein processing dipeptidyl-peptidase and tripeptidyvacuolar membrane (sensu Fungi) | YHR028W-A	YPS163_Chr8-4n and/or T73_Chr8-4n	aneuploid vs. isogenic euploid strain pairs
YHR030C	YHR030C ... SLT2 cell wall organization and bio MAP kinase activity cytoplasm* | YHR031C	YPS163_Chr8-4n and/or T73_Chr8-4n	aneuploid vs. isogenic euploid strain pairs
YHR036W	YHR036W … BRL1 biological process unknown molecular function unknown | Essential nuclear envelope integral membrane protein identified as a suppressor of a conditional mutation in the major karyopherin, CRM1; homologous to and interacts with Brr6p, a nuclear envelope protein involved in nuclear exportYHR037W	YPS163_Chr8-4n and/or T73_Chr8-4n	aneuploid vs. isogenic euploid strain pairs
YHR051W	YHR051W ... COX6 aerobic respiration* cytochrome-c oxidase activity respiratory chain complex IV (sensu | YHR052W	YPS163_Chr8-4n and/or T73_Chr8-4n	aneuploid vs. isogenic euploid strain pairs
YHR056C	YHR056C ... RSC30 regulation of transcription, D DNA binding RSC complex | YHR056W-A	YPS163_Chr8-4n and/or T73_Chr8-4n	aneuploid vs. isogenic euploid strain pairs
YHR063C	YHR063C ... PAN5 pantothenate biosynthesis 2-dehydropantoate 2-reductase activcytoplasm* | YHR063W-A	YPS163_Chr8-4n and/or T73_Chr8-4n	aneuploid vs. isogenic euploid strain pairs
YHR065C	YHR065C PAC cluster RRP3 35S primary transcript process ATP-dependent RNA helicase activitynucleolus | YHR066W	YPS163_Chr8-4n and/or T73_Chr8-4n	aneuploid vs. isogenic euploid strain pairs
YHR085W	YHR085W ... IPI1 rRNA processing* molecular function unknown nucleus* | YHR086W	YPS163_Chr8-4n and/or T73_Chr8-4n	aneuploid vs. isogenic euploid strain pairs
YHR090C	YHR090C ... YNG2 chromatin modification enzyme activator activity nucleus* | YHR091C	YPS163_Chr8-4n and/or T73_Chr8-4n	aneuploid vs. isogenic euploid strain pairs
YHR092C	YHR092C ... HXT4 hexose transport glucose transporter activity* plasma membrane | YHR093W	YPS163_Chr8-4n and/or T73_Chr8-4n	aneuploid vs. isogenic euploid strain pairs
YHR099W	YHR099W ... TRA1 regulation of transcription fr histone acetyltransferase activity histone acetyltransferase complex* | YHR100C	YPS163_Chr8-4n and/or T73_Chr8-4n	aneuploid vs. isogenic euploid strain pairs
YHR102W	YHR102W ... KIC1 cell wall organization and bio kinase activity cytoplasm* | YHR103W	YPS163_Chr8-4n and/or T73_Chr8-4n	aneuploid vs. isogenic euploid strain pairs
YHR105W	YHR105W ... YPT35 biological process unknown molecular function unknown endosome | YHR106W	YPS163_Chr8-4n and/or T73_Chr8-4n	aneuploid vs. isogenic euploid strain pairs
YHR107C	YHR107C ... CDC12 cell wall organization and bio GTPase activity* cytoplasm* | YHR108W	YPS163_Chr8-4n and/or T73_Chr8-4n	aneuploid vs. isogenic euploid strain pairs
YHR108W	YHR108W ... GGA2 Golgi to vacuole transport molecular function unknown Golgi trans face | YHR109W	YPS163_Chr8-4n and/or T73_Chr8-4n	aneuploid vs. isogenic euploid strain pairs
YHR113W	YHR113W ... YHR113W proteolysis and peptidolysis metalloendopeptidase activity* cytoplasm* | YHR114W	YPS163_Chr8-4n and/or T73_Chr8-4n	aneuploid vs. isogenic euploid strain pairs
YHR117W	YHR117W ... TOM71 biological process unknown protein transporter activity mitochondrial outer membrane | YHR118C	YPS163_Chr8-4n and/or T73_Chr8-4n	aneuploid vs. isogenic euploid strain pairs
YHR120W	YHR120W ... MSH1 DNA repair ATP binding mitochondrion | YHR121W	YPS163_Chr8-4n and/or T73_Chr8-4n	aneuploid vs. isogenic euploid strain pairs
YHR127W	YHR127W ... YHR127W biological process unknown molecular function unknown nucleus | YHR128W	YPS163_Chr8-4n and/or T73_Chr8-4n	aneuploid vs. isogenic euploid strain pairs
YHR129C	YHR129C ... ARP1 establishment of mitotic spind structural constituent of cytoskeledynactin complex | YHR130C	YPS163_Chr8-4n and/or T73_Chr8-4n	aneuploid vs. isogenic euploid strain pairs
YHR132C	YHR132C ... ECM14 cell wall organization and bio metalloendopeptidase activity vacuole (sensu Fungi) | YHR132W-A	YPS163_Chr8-4n and/or T73_Chr8-4n	aneuploid vs. isogenic euploid strain pairs
YHR132W-A	YHR132W-A ... YHR132W-A biological process unknown molecular function unknown cytoplasm* | YHR133C	YPS163_Chr8-4n and/or T73_Chr8-4n	aneuploid vs. isogenic euploid strain pairs
YHR135C	YHR135C ... YCK1 protein amino acid phosphoryla casein kinase I activity endoplasmic reticulum* | YHR136C	YPS163_Chr8-4n and/or T73_Chr8-4n	aneuploid vs. isogenic euploid strain pairs
YHR140W	YHR140W ... YHR140W biological process unknown molecular function unknown integral to membrane | YHR141C	YPS163_Chr8-4n and/or T73_Chr8-4n	aneuploid vs. isogenic euploid strain pairs
YHR154W	YHR154W ... RTT107 negative regulation of DNA tra molecular function unknown nucleus | YHR155W	YPS163_Chr8-4n and/or T73_Chr8-4n	aneuploid vs. isogenic euploid strain pairs
YHR167W	YHR167W ... THP2 mRNA-nucleus export* nucleic acid binding THO complex | YHR168W	YPS163_Chr8-4n and/or T73_Chr8-4n	aneuploid vs. isogenic euploid strain pairs
YHR169W	YHR169W PAC cluster DBP8 35S primary transcript process ATP-dependent RNA helicase activitynucleolus | YHR170W	YPS163_Chr8-4n and/or T73_Chr8-4n	aneuploid vs. isogenic euploid strain pairs
YHR171W	YHR171W iESR cluster ATG7 protein-vacuolar targeting* ubiquitin-like conjugating enzyme acytoplasm* | YHR172W	YPS163_Chr8-4n and/or T73_Chr8-4n	aneuploid vs. isogenic euploid strain pairs
YHR172W	YHR172W ... SPC97 microtubule nucleation structural constituent of cytoskeleouter plaque of spindle pole body* | YHR173C	YPS163_Chr8-4n and/or T73_Chr8-4n	aneuploid vs. isogenic euploid strain pairs
YHR178W	YHR178W ... STB5 transcription* transcription factor activity nucleus | YHR179W	YPS163_Chr8-4n and/or T73_Chr8-4n	aneuploid vs. isogenic euploid strain pairs
YHR179W	YHR179W ... OYE2 biological process unknown NADPH dehydrogenase activity cytoplasm* | YHR180C-B	YPS163_Chr8-4n and/or T73_Chr8-4n	aneuploid vs. isogenic euploid strain pairs
YHR184W	YHR184W ... SSP1 protein complex assembly* molecular function unknown prospore membrane | YHR185C	YPS163_Chr8-4n and/or T73_Chr8-4n	aneuploid vs. isogenic euploid strain pairs
YHR186C	YHR186C ... KOG1 biological process unknown molecular function unknown mitochondrion* | YHR187W	YPS163_Chr8-4n and/or T73_Chr8-4n	aneuploid vs. isogenic euploid strain pairs
YHR187W	YHR187W ... IKI1 regulation of transcription fr RNA polymerase II transcription elotranscription elongation factor com | YHR188C	YPS163_Chr8-4n and/or T73_Chr8-4n	aneuploid vs. isogenic euploid strain pairs
YHR192W	YHR192W ... YHR192W biological process unknown molecular function unknown cytoplasm | YHR193C	YPS163_Chr8-4n and/or T73_Chr8-4n	aneuploid vs. isogenic euploid strain pairs
YHR193C	YHR193C PAC cluster EGD2 nascent polypeptide associatio unfolded protein binding nascent polypeptide-associated comp | YHR193C-A	YPS163_Chr8-4n and/or T73_Chr8-4n	aneuploid vs. isogenic euploid strain pairs
YHR196W	YHR196W PAC cluster UTP9 processing of 20S pre-rRNA snoRNA binding nucleus* | YHR197W	YPS163_Chr8-4n and/or T73_Chr8-4n	aneuploid vs. isogenic euploid strain pairs
YHR200W	YHR200W ... RPN10 ubiquitin-dependent protein ca endopeptidase activity proteasome complex (sensu Eukaryota | YHR201C	YPS163_Chr8-4n and/or T73_Chr8-4n	aneuploid vs. isogenic euploid strain pairs
YPL009C	YPL009C ... YPL009C biological process unknown molecular function unknown cytoplasm | YPL010W	YJM428_Chr16-4n	aneuploid vs. isogenic euploid strain pairs
YPL011C	YPL011C ... TAF3 transcription initiation from general RNA polymerase II transcriptranscription factor TFIID complex | YPL012W	YJM428_Chr16-4n	aneuploid vs. isogenic euploid strain pairs
YPL013C	YPL013C ... MRPS16 protein biosynthesis structural constituent of ribosome mitochondrial small ribosomal subun | YPL014W	YJM428_Chr16-4n	aneuploid vs. isogenic euploid strain pairs
YPL019C	YPL019C ... VTC3 vacuole fusion, non-autophagic molecular function unknown vacuolar membrane | YPL020C	YJM428_Chr16-4n	aneuploid vs. isogenic euploid strain pairs
YPL028W	YPL028W ... ERG10 ergosterol biosynthesis acetyl-CoA C-acetyltransferase acticytosol | YPL029W	YJM428_Chr16-4n	aneuploid vs. isogenic euploid strain pairs
YPL043W	YPL043W PAC cluster NOP4 rRNA processing RNA binding nucleolus | YPL044C	YJM428_Chr16-4n	aneuploid vs. isogenic euploid strain pairs
YPL045W	YPL045W ... VPS16 protein-vacuolar targeting* molecular function unknown vacuolar membrane (sensu Fungi)* | YPL046C	YJM428_Chr16-4n	aneuploid vs. isogenic euploid strain pairs
YPL059W	YPL059W ... GRX5 response to osmotic stress* thiol-disulfide exchange intermediamitochondrial matrix | YPL060W	YJM428_Chr16-4n	aneuploid vs. isogenic euploid strain pairs
YPL061W	YPL061W ... ALD6 acetate biosynthesis aldehyde dehydrogenase activity cytoplasm* | YPL062W	YJM428_Chr16-4n	aneuploid vs. isogenic euploid strain pairs
YPL070W	YPL070W ... MUK1 regulation of transcription molecular function unknown cytoplasm | YPL071C	YJM428_Chr16-4n	aneuploid vs. isogenic euploid strain pairs
YPL071C	YPL071C ... YPL071C biological process unknown molecular function unknown cytoplasm* | YPL072W	YJM428_Chr16-4n	aneuploid vs. isogenic euploid strain pairs
YPL078C	YPL078C ... ATP4 ATP synthesis coupled proton t structural molecule activity* "proton-transporting ATP synthase, s" | YPL079W	YJM428_Chr16-4n	aneuploid vs. isogenic euploid strain pairs
YPL079W	YPL079W RP cluster RPL21B protein biosynthesis structural constituent of ribosome cytosolic large ribosomal subunit ( | YPL080C	YJM428_Chr16-4n	aneuploid vs. isogenic euploid strain pairs
YPL080C	YPL080C ... | YPL081W	YJM428_Chr16-4n	aneuploid vs. isogenic euploid strain pairs
YPL082C	YPL082C ... MOT1 regulation of transcription fr ATPase activity mitochondrion* | YPL083C	YJM428_Chr16-4n	aneuploid vs. isogenic euploid strain pairs
YPL090C	YPL090C RP cluster RPS6A protein biosynthesis structural constituent of ribosome cytosolic small ribosomal subunit ( | YPL091W	YJM428_Chr16-4n	aneuploid vs. isogenic euploid strain pairs
YPL099C	YPL099C … AIM43 biological process unknown molecular function unknown mitochondrion | Protein of unknown function; the authentic, non-tagged protein is detected in purified mitochondria in high-throughput studies; null mutant displays elevated frequency of mitochondrial genome lossYPL100W	YJM428_Chr16-4n	aneuploid vs. isogenic euploid strain pairs
YPL104W	YPL104W ... MSD1 protein biosynthesis aspartate-tRNA ligase activity mitochondrion | YPL105C	YJM428_Chr16-4n	aneuploid vs. isogenic euploid strain pairs
YPL111W	YPL111W ... CAR1 arginine catabolism to ornithi arginase activity cytosol | YPL112C	YJM428_Chr16-4n	aneuploid vs. isogenic euploid strain pairs
YPL117C	YPL117C ... IDI1 ergosterol biosynthesis isopentenyl-diphosphate delta-isomecytosol | YPL118W	YJM428_Chr16-4n	aneuploid vs. isogenic euploid strain pairs
YPL120W	YPL120W ... VPS30 protein-vacuolar targeting* molecular function unknown membrane fraction | YPL121C	YJM428_Chr16-4n	aneuploid vs. isogenic euploid strain pairs
YPL146C	YPL146C PAC cluster NOP53 ribosome biogenesis* protein binding nucleus* | YPL147W	YJM428_Chr16-4n	aneuploid vs. isogenic euploid strain pairs
YPL149W	YPL149W ... ATG5 protein-vacuolar targeting* molecular function unknown cytosol* | YPL150W	YJM428_Chr16-4n	aneuploid vs. isogenic euploid strain pairs
YPL156C	YPL156C ... PRM4 conjugation with cellular fusi molecular function unknown integral to membrane | YPL157W	YJM428_Chr16-4n	aneuploid vs. isogenic euploid strain pairs
YPL157W	YPL157W ... TGS1 ribosome biogenesis* RNA methyltransferase activity nucleolus | YPL158C	YJM428_Chr16-4n	aneuploid vs. isogenic euploid strain pairs
YPL158C	YPL158C … AIM44 biological process unknown molecular function unknown | Protein of unknown function; GFP-fusion protein localizes to the bud neck; transcription is regulated by Swi5p; null mutant displays elevated frequency of mitochondrial genome lossYPL159C	YJM428_Chr16-4n	aneuploid vs. isogenic euploid strain pairs
YPL170W	YPL170W ... DAP1 sterol metabolism heme binding membrane | YPL171C	YJM428_Chr16-4n	aneuploid vs. isogenic euploid strain pairs
YPL173W	YPL173W ... MRPL40 protein biosynthesis structural constituent of ribosome mitochondrial large ribosomal subun | YPL174C	YJM428_Chr16-4n	aneuploid vs. isogenic euploid strain pairs
YPL177C	YPL177C ... CUP9 transcription initiation from specific RNA polymerase II transcrinucleus | YPL178W	YJM428_Chr16-4n	aneuploid vs. isogenic euploid strain pairs
YPL189C-A	YPL189C-A … COA2 biological process unknown molecular function unknown | Cytochrome oxidase assembly factor; null mutation results in respiratory deficiency with specific loss of cytochrome oxidase activity; functions downstream of assembly factors Mss51p and Coa1p and interacts with assembly factor Shy1pYPL189W	YJM428_Chr16-4n	aneuploid vs. isogenic euploid strain pairs
YPL190C	YPL190C ... NAB3 regulation of transcription fr poly(A) binding nucleus | YPL191C	YJM428_Chr16-4n	aneuploid vs. isogenic euploid strain pairs
YPL191C	YPL191C ... YPL191C biological process unknown molecular function unknown cytoplasm | YPL192C	YJM428_Chr16-4n	aneuploid vs. isogenic euploid strain pairs
YPL193W	YPL193W ... RSA1 ribosomal large subunit assemb molecular function unknown nucleoplasm | YPL194W	YJM428_Chr16-4n	aneuploid vs. isogenic euploid strain pairs
YPL195W	YPL195W ... APL5 vesicle-mediated transport* molecular function unknown AP-3 adaptor complex | YPL196W	YJM428_Chr16-4n	aneuploid vs. isogenic euploid strain pairs
YPL198W	YPL198W RP cluster RPL7B protein biosynthesis structural constituent of ribosome cytosolic large ribosomal subunit ( | YPL199C	YJM428_Chr16-4n	aneuploid vs. isogenic euploid strain pairs
YPL199C	YPL199C ... YPL199C biological process unknown molecular function unknown cytoplasm | YPL200W	YJM428_Chr16-4n	aneuploid vs. isogenic euploid strain pairs
YPL202C	YPL202C ... AFT2 transcription initiation from transcription factor activity* nucleus* | YPL203W	YJM428_Chr16-4n	aneuploid vs. isogenic euploid strain pairs
YPL210C	YPL210C ... SRP72 protein-ER targeting* signal sequence binding signal recognition particle (sensu | YPL211W	YJM428_Chr16-4n	aneuploid vs. isogenic euploid strain pairs
YPL211W	YPL211W PAC cluster NIP7 rRNA processing* molecular function unknown nucleolus* | YPL212C	YJM428_Chr16-4n	aneuploid vs. isogenic euploid strain pairs
YPL217C	YPL217C PAC cluster BMS1 rRNA processing* GTP binding cytoplasm* | YPL218W	YJM428_Chr16-4n	aneuploid vs. isogenic euploid strain pairs
YPL226W	YPL226W PAC cluster NEW1 biological process unknown ATPase activity* cytoplasm* | YPL227C	YJM428_Chr16-4n	aneuploid vs. isogenic euploid strain pairs
YPL231W	YPL231W ... FAS2 fatty acid biosynthesis* phosphopantetheinyltransferase actimitochondrion* | YPL232W	YJM428_Chr16-4n	aneuploid vs. isogenic euploid strain pairs
YPL239W	YPL239W ... YAR1 response to osmotic stress* molecular function unknown cytoplasm | YPL240C	YJM428_Chr16-4n	aneuploid vs. isogenic euploid strain pairs
YPL243W	YPL243W ... SRP68 protein-ER targeting* signal sequence binding signal recognition particle (sensu | YPL244C	YJM428_Chr16-4n	aneuploid vs. isogenic euploid strain pairs
YPL245W	YPL245W PAC cluster YPL245W biological process unknown molecular function unknown cytoplasm* | YPL246C	YJM428_Chr16-4n	aneuploid vs. isogenic euploid strain pairs
YPL249C	YPL249C ... GYP5 ER to Golgi transport* Rab GTPase activator activity cytosol* | YPL249C-A	YJM428_Chr16-4n	aneuploid vs. isogenic euploid strain pairs
YPL252C	YPL252C ... YAH1 heme a biosynthesis electron carrier activity mitochondrial matrix | YPL253C	YJM428_Chr16-4n	aneuploid vs. isogenic euploid strain pairs
YPL256C	YPL256C ... CLN2 regulation of cyclin dependent cyclin-dependent protein kinase regcytoplasm* | YPL257W	YJM428_Chr16-4n	aneuploid vs. isogenic euploid strain pairs
YPL262W	YPL262W ... FUM1 tricarboxylic acid cycle* fumarate hydratase activity cytosol* | YPL263C	YJM428_Chr16-4n	aneuploid vs. isogenic euploid strain pairs
YPL263C	YPL263C PAC cluster KEL3 biological process unknown molecular function unknown cytoplasm | YPL264C	YJM428_Chr16-4n	aneuploid vs. isogenic euploid strain pairs
YPL265W	YPL265W ... DIP5 amino acid transport amino acid transporter activity* plasma membrane | YPL266W	YJM428_Chr16-4n	aneuploid vs. isogenic euploid strain pairs
YPR010C-A	YPR010C-A … Putative protein of unknown function; conserved among Saccharomyces sensu stricto speciesYPR137C-A	YJM428_Chr16-4n	aneuploid vs. isogenic euploid strain pairs
YPR013C	YPR013C ... YPR013C biological process unknown molecular function unknown cellular component unknown | YPR014C	YJM428_Chr16-4n	aneuploid vs. isogenic euploid strain pairs
YPR017C	YPR017C ... DSS4 secretory pathway guanyl-nucleotide exchange factor amembrane fraction* | YPR018W	YJM428_Chr16-4n	aneuploid vs. isogenic euploid strain pairs
YPR025C	YPR025C ... CCL1 transcription initiation from general RNA polymerase II transcripmitochondrion* | YPR026W	YJM428_Chr16-4n	aneuploid vs. isogenic euploid strain pairs
YPR033C	YPR033C PAC cluster HTS1 histidyl-tRNA aminoacylation histidine-tRNA ligase activity cytoplasm* | YPR034W	YJM428_Chr16-4n	aneuploid vs. isogenic euploid strain pairs
YPR035W	YPR035W ... GLN1 nitrogen compound metabolism* glutamate-ammonia ligase activity cytoplasm | YPR036W	YJM428_Chr16-4n	aneuploid vs. isogenic euploid strain pairs
YPR045C	YPR045C ... YPR045C biological process unknown molecular function unknown nucleus | YPR046W	YJM428_Chr16-4n	aneuploid vs. isogenic euploid strain pairs
YPR049C	YPR049C ... ATG11 protein-vacuolar targeting* molecular function unknown extrinsic to membrane | YPR050C	YJM428_Chr16-4n	aneuploid vs. isogenic euploid strain pairs
YPR058W	YPR058W ... YMC1 transport transporter activity mitochondrial inner membrane | YPR059C	YJM428_Chr16-4n	aneuploid vs. isogenic euploid strain pairs
YPR060C	YPR060C PAC cluster ARO7 aromatic amino acid family bio chorismate mutase activity cytoplasm* | YPR061C	YJM428_Chr16-4n	aneuploid vs. isogenic euploid strain pairs
YPR065W	YPR065W ... ROX1 negative regulation of transcr specific transcriptional repressor nuclear chromosome | YPR066W	YJM428_Chr16-4n	aneuploid vs. isogenic euploid strain pairs
YPR067W	YPR067W iESR cluster ISA2 iron ion transport molecular function unknown mitochondrial intermembrane space | YPR068C	YJM428_Chr16-4n	aneuploid vs. isogenic euploid strain pairs
YPR069C	YPR069C ... SPE3 pantothenate biosynthesis* spermidine synthase activity cytoplasm* | YPR070W	YJM428_Chr16-4n	aneuploid vs. isogenic euploid strain pairs
YPR072W	YPR072W ... NOT5 regulation of transcription fr 3'-5'-exoribonuclease activity cytoplasm* | YPR073C	YJM428_Chr16-4n	aneuploid vs. isogenic euploid strain pairs
YPR078C	YPR078C ... YPR078C meiosis* molecular function unknown cellular component unknown | YPR079W	YJM428_Chr16-4n	aneuploid vs. isogenic euploid strain pairs
YPR080W	YPR080W PAC cluster TEF1 translational elongation translation elongation factor activribosome* | YPR081C	YJM428_Chr16-4n	aneuploid vs. isogenic euploid strain pairs
YPR082C	YPR082C ... DIB1 nuclear mRNA splicing, via spl "RNA splicing factor activity, trans"U4/U6 x U5 tri-snRNP complex | YPR083W	YJM428_Chr16-4n	aneuploid vs. isogenic euploid strain pairs
YPR085C	YPR085C … ASA1 biological process unknown molecular function unknown | Putative protein of unknown function; subunit of the ASTRA complex (Rvb1p, Rvb2p, Tra1p, Tti1p, Tti2, Asa1p and Tra1p) which is part of the chromatin remodeling machineryYPR086W	YJM428_Chr16-4n	aneuploid vs. isogenic euploid strain pairs
YPR086W	YPR086W ... SUA7 transcription initiation from general RNA polymerase II transcripnucleoplasm | YPR087W	YJM428_Chr16-4n	aneuploid vs. isogenic euploid strain pairs
YPR092W	YPR092W ... | YPR093C	YJM428_Chr16-4n	aneuploid vs. isogenic euploid strain pairs
YPR102C	YPR102C RP cluster RPL11A protein biosynthesis* structural constituent of ribosome cytosolic large ribosomal subunit ( | YPR103W	YJM428_Chr16-4n	aneuploid vs. isogenic euploid strain pairs
YPR108W	YPR108W ... RPN7 ubiquitin-dependent protein ca structural molecule activity "proteasome regulatory particle, lid" | YPR108W-A	YJM428_Chr16-4n	aneuploid vs. isogenic euploid strain pairs
YPR112C	YPR112C PAC cluster MRD1 35S primary transcript process snoRNA binding* nucleolus | YPR113W	YJM428_Chr16-4n	aneuploid vs. isogenic euploid strain pairs
YPR123C	YPR123C ... | YPR124W	YJM428_Chr16-4n	aneuploid vs. isogenic euploid strain pairs
YPR124W	YPR124W ... CTR1 copper ion import copper uptake transporter activity plasma membrane | YPR125W	YJM428_Chr16-4n	aneuploid vs. isogenic euploid strain pairs
YPR129W	YPR129W ... SCD6 RNA metabolism RNA binding cytoplasm | YPR130C	YJM428_Chr16-4n	aneuploid vs. isogenic euploid strain pairs
YPR130C	YPR130C ... | YPR131C	YJM428_Chr16-4n	aneuploid vs. isogenic euploid strain pairs
YPR132W	YPR132W RP cluster RPS23B protein biosynthesis* structural constituent of ribosome cytosolic small ribosomal subunit ( | YPR133C	YJM428_Chr16-4n	aneuploid vs. isogenic euploid strain pairs
YPR133C	YPR133C … SPN1 (IWS1) nucleotide-excision repair* delta DNA polymerase activity delta DNA polymerase complex | Protein that interacts with Spt6p and copurifies with Spt5p and RNA polymerase II, probable transcriptional elongation factor; metazoan homologs contain an acidic N terminus; mutations in the gene confer an Spt- phenotypeYPR133W-A	YJM428_Chr16-4n	aneuploid vs. isogenic euploid strain pairs
YPR136C	YPR136C PAC cluster | YPR137W	YJM428_Chr16-4n	aneuploid vs. isogenic euploid strain pairs
YPR137W	YPR137W PAC cluster RRP9 rRNA modification* snoRNA binding small nucleolar ribonucleoprotein c | YPR138C	YJM428_Chr16-4n	aneuploid vs. isogenic euploid strain pairs
YPR138C	YPR138C ... MEP3 ammonium transport ammonium transporter activity plasma membrane | YPR139C	YJM428_Chr16-4n	aneuploid vs. isogenic euploid strain pairs
YPR140W	YPR140W ... TAZ1 phospholipid biosynthesis* acyltransferase activity mitochondrion | YPR141C	YJM428_Chr16-4n	aneuploid vs. isogenic euploid strain pairs
YPR142C	YPR142C PAC cluster | YPR143W	YJM428_Chr16-4n	aneuploid vs. isogenic euploid strain pairs
YPR143W	YPR143W PAC cluster RRP15 processing of 27S pre-rRNA molecular function unknown nucleus* | YPR144C	YJM428_Chr16-4n	aneuploid vs. isogenic euploid strain pairs
YPR144C	YPR144C PAC cluster NOC4 processing of 20S pre-rRNA* snoRNA binding nucleus* | YPR145W	YJM428_Chr16-4n	aneuploid vs. isogenic euploid strain pairs
YPR145W	YPR145W PAC cluster ASN1 asparagine biosynthesis asparagine synthase (glutamine-hydrcytoplasm | YPR146C	YJM428_Chr16-4n	aneuploid vs. isogenic euploid strain pairs
YPR160W	YPR160W ... GPH1 glycogen catabolism glycogen phosphorylase activity cytoplasm | YPR161C	YJM428_Chr16-4n	aneuploid vs. isogenic euploid strain pairs
YPR161C	YPR161C ... SGV1 protein amino acid phosphoryla cyclin-dependent protein kinase actnucleus | YPR162C	YJM428_Chr16-4n	aneuploid vs. isogenic euploid strain pairs
YPR167C	YPR167C ... MET16 methionine metabolism* phosphoadenylyl-sulfate reductase (cytoplasm* | YPR168W	YJM428_Chr16-4n	aneuploid vs. isogenic euploid strain pairs
YPR169W	YPR169W PAC cluster JIP5 protein monoubiquitination molecular function unknown nucleus* | YPR170C	YJM428_Chr16-4n	aneuploid vs. isogenic euploid strain pairs
YPR171W	YPR171W ... BSP1 actin cytoskeleton organizatio "protein binding, bridging" bud neck* | YPR172W	YJM428_Chr16-4n	aneuploid vs. isogenic euploid strain pairs
YPR179C	YPR179C ... HDA3 regulation of transcription, D histone deacetylase activity nucleus* | YPR180W	YJM428_Chr16-4n	aneuploid vs. isogenic euploid strain pairs
YPR186C	YPR186C ... PZF1 transcription initiation from RNA polymerase III transcription fatranscription factor complex | YPR187W	YJM428_Chr16-4n	aneuploid vs. isogenic euploid strain pairs
YPR190C	YPR190C PAC cluster RPC82 transcription from RNA polymer DNA-directed RNA polymerase activitDNA-directed RNA polymerase III com | YPR191W	YJM428_Chr16-4n	aneuploid vs. isogenic euploid strain pairs
YPR191W	YPR191W ... QCR2 aerobic respiration* ubiquinol-cytochrome-c reductase acmitochondrion* | YPR192W	YJM428_Chr16-4n	aneuploid vs. isogenic euploid strain pairs
YPR192W	YPR192W ... AQY1 water transport water channel activity plasma membrane | YPR193C	YJM428_Chr16-4n	aneuploid vs. isogenic euploid strain pairs

## Sheet: Amp. genes - higher expression
	Comparison in which identified
YLR299W	closely related strain pairs (Fig 4A)
YIL094C	closely related strain pairs (Fig 4A)
YLL042C	closely related strain pairs (Fig 4A)
YLR004C	closely related strain pairs (Fig 4A)
YPL111W	closely related strain pairs (Fig 4A)
YPL119C	closely related strain pairs (Fig 4A)
YPL110C	closely related strain pairs (Fig 4A)
YPL087W	closely related strain pairs (Fig 4A)
YIL074C	closely related strain pairs (Fig 4A)
YLR342W-A	closely related strain pairs (Fig 4A)
YLR120C	closely related strain pairs (Fig 4A)
YPL156C	closely related strain pairs (Fig 4A)
YHR053C	closely related strain pairs (Fig 4A)
YPL088W	closely related strain pairs (Fig 4A)
YPR184W	closely related strain pairs (Fig 4A)
YPR021C	closely related strain pairs (Fig 4A)
YLR290C	closely related strain pairs (Fig 4A)
YPR026W	closely related strain pairs (Fig 4A)
YPR160W	closely related strain pairs (Fig 4A)
YCR090C	closely related strain pairs (Fig 4A)
YLR350W	closely related strain pairs (Fig 4A)
YPL186C	closely related strain pairs (Fig 4A)
YJR022W	closely related strain pairs (Fig 4A)
YPR044C	closely related strain pairs (Fig 4A)
YPR167C	closely related strain pairs (Fig 4A)
YPL234C	closely related strain pairs (Fig 4A)
YLR023C	closely related strain pairs (Fig 4A)
YPL272C	closely related strain pairs (Fig 4A)
YJR116W	closely related strain pairs (Fig 4A)
YPL148C	closely related strain pairs (Fig 4A)
YJL085W	closely related strain pairs (Fig 4A)
YPL167C	closely related strain pairs (Fig 4A)
YLR245C	closely related strain pairs (Fig 4A)
YPL036W	closely related strain pairs (Fig 4A)
YJL051W	closely related strain pairs (Fig 4A)
YLR286C	closely related strain pairs (Fig 4A)
YIL096C	closely related strain pairs (Fig 4A)
YIR038C	closely related strain pairs (Fig 4A)
YJL099W	closely related strain pairs (Fig 4A)
YLR367W	closely related strain pairs (Fig 4A)
YJL005W	closely related strain pairs (Fig 4A)
YIR016W	closely related strain pairs (Fig 4A)
YPR109W	closely related strain pairs (Fig 4A)
YJL023C	closely related strain pairs (Fig 4A)
YPL149W	closely related strain pairs (Fig 4A)
YLR120C	closely related strain pairs (Fig 4A)
YLR446W	closely related strain pairs (Fig 4A)
YLR258W	closely related strain pairs (Fig 4A)
YIR007W	closely related strain pairs (Fig 4A)
YLR237W	closely related strain pairs (Fig 4A)
YPR196W	isogenic strain pairs (Fig 4B)
YPR093C	isogenic strain pairs (Fig 4B)
YPL229W	isogenic strain pairs (Fig 4B)
YPR151C	isogenic strain pairs (Fig 4B)
YPL123C	isogenic strain pairs (Fig 4B)
YPR156C	isogenic strain pairs (Fig 4B)
YPL116W	isogenic strain pairs (Fig 4B)
YPR006C	isogenic strain pairs (Fig 4B)
YPL189W	isogenic strain pairs (Fig 4B)
YPL222W	isogenic strain pairs (Fig 4B)
YPR108W-A	isogenic strain pairs (Fig 4B)
YPL205C	isogenic strain pairs (Fig 4B)
YPR157W	isogenic strain pairs (Fig 4B)
YPR127W	isogenic strain pairs (Fig 4B)
YPL165C	isogenic strain pairs (Fig 4B)
YPL014W	isogenic strain pairs (Fig 4B)
YHR094C	isogenic strain pairs (Fig 4B)
YHR048W	isogenic strain pairs (Fig 4B)
YHR181W	isogenic strain pairs (Fig 4B)
YHR215W	isogenic strain pairs (Fig 4B)
YHR209W	isogenic strain pairs (Fig 4B)
YHL014C	isogenic strain pairs (Fig 4B)
YHR063W-A	isogenic strain pairs (Fig 4B)
YHL037C	isogenic strain pairs (Fig 4B)
YHR137W	isogenic strain pairs (Fig 4B)
YLR142W	Class 3b
YLR080W	Class 3b
YLR237W	Class 3b
YLR331C	Class 3b
YLR456W	Class 3b
YLL055W	Class 3b
YLR286W-A	Class 3b
YLL025W	Class 3b
YLR255C	Class 3b
YLR341W	Class 3b
YLL037W	Class 3b
YLR101C	Class 3b
YLR437C	Class 3b
YLR452C	Class 3b
YLL060C	Class 3b
YLR154C	Class 3b
YLL023C	Class 3b
YLR347C	Class 3b
YLR376C	Class 3b
YLR123C	Class 3b
YLR078C	Class 3b
YLR329W	Class 3b
YLR031W	Class 3b
YLR350W	Class 3b
YHR145C	Class 3b
YLR342W	Class 3b
YLL035W	Class 3b
YLR285C-A	Class 3b
YLR242C	Class 3b
YLR313C	Class 3b
YLR209C	Class 3b
YLR046C	Class 3b
YLR018C	Class 3b
YLR390W-A	Class 3b
YLR267W	Class 3b
YLR273C	Class 3b
YLL004W	Class 3b
YHL012W	Class 3b
YLR051C	Class 3b
YHR056W-A	Class 3b
YLR438C-A	Class 3b
YLR023C	Class 3b
YLR137W	Class 3b
YLR330W	Class 3b
YLR417W	Class 3b
YLR003C	Class 3b
YLR421C	Class 3b
YLR271W	Class 3b
YHL043W	Class 3b
YLR298C	Class 3b
YLR181C	Class 3b
YLR124W	Class 3b
YLR247C	Class 3b
YLR196W	Class 3b
YHR160C	Class 3b
YLR120W-A	Class 3b
YHR055C	Class 3b
YLR299W	Class 3b
YLR005W	Class 3b
YLR316C	Class 3b
YHL037C	Class 3b
YLR147C	Class 3b
YLR244C	Class 3b
YLR318W	Class 3b
YHR179W	Class 3b
YLR433C	Class 3b
YLR285W	Class 3b
YLR022C	Class 3b
YHR097C	Class 3b
YLR093C	Class 3b
YLR007W	Class 3b
YHR156C	Class 3b
YLR254C	Class 3b
YLR360W	Class 3b
YHR078W	Class 3b
YLR343W	Class 3b
YLR287C	Class 3b
YLR146C	Class 3b
YHR130C	Class 3b
YLR333C	Class 3b
YLR153C	Class 3b
YLR363W-A	Class 3b
YLR225C	Class 3b
YLR092W	Class 3b
YHR148W	Class 3b
YHR199C-A	Class 3b
YHL016C	Class 3b
YHR064C	Class 3b
YLR387C	Class 3b
YLL042C	Class 3b
YHR104W	Class 3b
YLR016C	Class 3b
YHL024W	Class 3b
YHL042W	Class 3b
YHR105W	Class 3b
YHR157W	Class 3b
YHR004C	Class 3b
YHL021C	Class 3b
YHR043C	Class 3b
YHR215W	Class 3b
YLR233C	Class 3b
YHR088W	Class 3b
YHR133C	Class 3b
YHR045W	Class 3b
YHR094C	Class 3b
YHL028W	Class 3b
YHR211W	Class 3b
YLL063C	Class 3b
YLR194C	Class 3b
YLR243W	Class 3b
YLR265C	Class 3b
YLR227C	Class 3b
YLR065C	Class 3b
YHR069C-A	Class 3b
YHR102W	Class 3b
YHR214W	Class 3b
YHR112C	Class 3b
YHR188C	Class 3b
YLR438W	Class 3b
YLR118C	Class 3b
YHR137C-A	Class 3b
YHL010C	Class 3b
YHR049W	Class 3b
YHR175W	Class 3b
YHR155W	Class 3b
YHR152W	Class 3b
YHR138C	Class 3b
YHL030W	Class 3b
YHR098C	Class 3b
YHR214W-A	Class 3b
YLL052C	Class 3b
YLL053C	Class 3b
YLL027W	Class 3b
YLL054C	Class 3b
YLR431C	Class 3b
YLL012W	Class 3b
YLR066W	Class 3b
YLR120C	Class 3b
YLR297W	Class 3b
YLR286C	Class 3b
YLR327C	Class 3b
YLL061W	Class 3b

## Sheet: MLR classifications
UID	NAME	Strain	Assigned Class	ahat (intercept)	bhat (slope)	Class 1 Post. Probability (int 0; slope 1)	Class 2a Post. Probability (int < 0; slope 1)	Class 2b Post. Probability (int > 0; slope 1)	Class 3a Post. Probability (slope < 1)	Class 3b Post. Probability (slope > 1)	DNA meanreads	RNA meanreads
YLR130C	YLR130C ... ZRT2 low-affinity zinc ion transpor low-affinity zinc ion transporter aplasma membrane | YLR131C	YPS1009	1	0.1216	0.7764	0.5368	0.0268	0.0169	0.4172	0.0023	482.83	1989.22
YLR405W	YLR405W PAC cluster DUS4 tRNA modification tRNA dihydrouridine synthase activicellular component unknown | YLR406C	YPS1009	1	0.1536	0.7459	0.5686	0.0408	0.0147	0.3731	0.0028	434.83	471.89
YLR241W	YLR241W ... YLR241W biological process unknown molecular function unknown cellular component unknown | YLR242C	YPS1009	1	0.0509	0.8354	0.5236	0.1339	0.0025	0.3382	0.0018	892.17	1271.33
YLR434C	YLR434C ... | YLR435W	YPS1009	1	0.1728	0.6093	0.3506	0.2175	0.0378	0.3185	0.0756	171.33	6.44
YLR320W	YLR320W ... MMS22 double-strand break repair molecular function unknown nucleus | YLR321C	YPS1009	1	0.0989	0.7904	0.6235	0.0513	0.0094	0.3141	0.0018	1699	886.33
YLR010C	YLR010C ... TEN1 telomere capping molecular function unknown nuclear telomere cap complex | YLR011W	YPS1009	1	0.1938	0.6236	0.3354	0.1994	0.0427	0.3065	0.116	229.67	34.56
YLR460C	YLR460C ... YLR460C biological process unknown molecular function unknown cellular component unknown | YLR461W	YPS1009	1	0.1415	1.1562	0.2984	0.1589	0.0474	0.2979	0.1974	590.33	31.22
YLR178C	YLR178C iESR cluster TFS1 regulation of proteolysis and lipid binding* soluble fraction | YLR179C	YPS1009	1	-0.0403	0.8028	0.3134	0.2953	0.0226	0.2553	0.1133	243.5	43.67
YLR337C	YLR337C ... VRP1 endocytosis* actin binding actin cortical patch | YLR338W	YPS1009	1	0.0887	0.6446	0.367	0.2991	0.0149	0.2539	0.0651	823.83	50.56
YLR139C	YLR139C ... SLS1 protein biosynthesis* molecular function unknown integral to membrane* | YLR140W	YPS1009	1	0.0928	0.6756	0.4015	0.3058	0.0091	0.2493	0.0343	770	128.67
YLR464W	YLR464W ... YLR464W biological process unknown molecular function unknown cellular component unknown | YLR465C	YPS1009	1	-1.1964	0.6456	0.3753	0.206	0.113	0.2407	0.065	7.67	5.11
YLR070C	YLR070C ... XYL2 monosaccharide metabolism D-xylulose reductase activity cellular component unknown | YLR071C	YPS1009	1	0.0311	1.0544	0.3273	0.2222	0.0431	0.2388	0.1686	385.83	8.44
YLR268W	YLR268W ... SEC22 ER to Golgi transport* v-SNARE activity endoplasmic reticulum* | YLR269C	YPS1009	1	0.0647	0.7689	0.5808	0.184	0.0085	0.2189	0.0078	289	791.67
YLR034C	YLR034C ... SMF3 intracellular sequestering of iron ion transporter activity vacuolar membrane (sensu Fungi) | YLR035C	YPS1009	1	0.1584	0.8525	0.5858	0.0597	0.0795	0.2166	0.0584	609.17	1484.78
YLR379W	YLR379W ... | YLR380W	YPS1009	1	-0.0749	0.9509	0.3426	0.3022	0.0234	0.216	0.1158	151	17.78
YLR418C	YLR418C ... CDC73 RNA elongation from RNA polyme RNA polymerase II transcription elonucleus* | YLR419W	YPS1009	1	0.1573	0.8678	0.6067	0.0474	0.0929	0.2147	0.0384	438	508.11
YLR374C	YLR374C ... | YLR375W	YPS1009	1	-0.6988	2.036	0.2599	0.2573	0.0397	0.2045	0.2386	125.67	6.89
YLR136C	YLR136C ... TIS11 mRNA catabolism* mRNA binding cytoplasm* | YLR137W	YPS1009	1	0.1915	0.7077	0.5655	0.1757	0.0246	0.2037	0.0306	393.83	122.89
YLR097C	YLR097C ... HRT3 ubiquitin-dependent protein ca ubiquitin-protein ligase activity nuclear ubiquitin ligase complex | YLR098C	YPS1009	1	0.1413	0.819	0.6795	0.0699	0.0438	0.1934	0.0134	417	254.33
YLR008C	YLR008C ... PAM18 mitochondrial matrix protein i unfolded protein binding* mitochondrial inner membrane preseq | YLR009W	YPS1009	1	0.0241	0.8162	0.6422	0.1632	0.0077	0.1819	0.005	227.83	703.44
YLR437C-A	YLR437C-A … Dubious Dubious open reading frame unlikely to encode a protein, based on available experimental and comparative sequence data; partially overlaps the verified ORF CAR2/YLR438WYLR466C-A	YPS1009	1	-0.5508	3.4361	0.3052	0.1916	0.0366	0.1787	0.2878	73	5.67
YLR198C	YLR198C PAC cluster | YLR199C	YPS1009	1	-0.0685	0.9578	0.4007	0.3084	0.0253	0.1733	0.0923	108.5	43.44
YLR347W-A	YLR347W-A … Dubious Dubious open reading frame unlikely to encode a protein, based on available experimental and comparative sequence data; overlaps the verified ORF KAP95/YLR347CYLR364C-A	YPS1009	1	-0.2008	1.6089	0.3565	0.1937	0.0447	0.1679	0.2373	70.67	21
YLR083C	YLR083C PAC cluster EMP70 transport transporter activity membrane fraction* | YLR084C	YPS1009	1	0.1209	0.8425	0.7243	0.0465	0.0489	0.1669	0.0134	782.33	5822.33
YLR020C	YLR020C ... YEH2 cell wall mannoprotein biosynt sterol esterase activity plasma membrane* | YLR021W	YPS1009	1	0.0038	0.8892	0.5553	0.2808	0.0019	0.1579	0.004	630.17	1033.33
YLR033W	YLR033W ... RSC58 chromatin remodeling molecular function unknown RSC complex | YLR034C	YPS1009	1	0.1209	0.9074	0.6813	0.0485	0.0813	0.1488	0.0401	670.33	1085.56
YLR380W	YLR380W ... CSR1 cell wall organization and bio phosphatidylinositol transporter accytoplasm* | YLR381W	YPS1009	1	0.087	0.8092	0.6698	0.1764	0.0081	0.1378	0.0079	471.67	500.67
YLR176C	YLR176C ... RFX1 negative regulation of transcr specific transcriptional repressor cytoplasm* | YLR177W	YPS1009	1	-0.0436	0.8863	0.4666	0.3469	0.0086	0.1352	0.0426	890.33	97.11
YLR370C	YLR370C iESR cluster ARC18 actin filament organization* structural constituent of cytoskeleArp2/3 protein complex | YLR371W	YPS1009	1	0.0915	1.0584	0.4482	0.0205	0.2252	0.13	0.1761	222.33	608.89
YLR151C	YLR151C ... PCD1 biological process unknown pyrophosphatase activity peroxisome | YLR152C	YPS1009	1	-0.3535	1.5982	0.4167	0.2263	0.0307	0.1288	0.1975	441.17	29
YLR115W	YLR115W ... CFT2 mRNA polyadenylylation* RNA binding mRNA cleavage and polyadenylation s | YLR116W	YPS1009	1	0.0594	0.8138	0.6637	0.1843	0.0126	0.1258	0.0137	1099	730.11
YLR146W-A	YLR146W-A YLR146W-A YPR145C-A	YPS1009	1	-0.0056	0.9805	0.5544	0.2221	0.0272	0.1242	0.072	86.83	44.89
YLR415C	YLR415C ... YLR415C biological process unknown molecular function unknown cellular component unknown | YLR416C	YPS1009	1	0.1035	1.0657	0.5505	0.0434	0.1401	0.1229	0.1431	77.17	33.33
YLR245C	YLR245C ... CDD1 cytidine catabolism* cytidine deaminase activity cytoplasm* | YLR246W	YPS1009	1	0.1292	0.8755	0.6676	0.1332	0.0349	0.1222	0.0421	187.67	85.89
YLR392C	YLR392C ... YLR392C biological process unknown molecular function unknown cytoplasm | YLR393W	YPS1009	1	0.0333	1.0252	0.5998	0.1591	0.0406	0.1167	0.0838	593.83	145.56
YLR378C	YLR378C ... SEC61 protein-ER targeting* protein transporter activity integral to endoplasmic reticulum m | YLR379W	YPS1009	1	-0.0174	0.8933	0.4825	0.3838	0.004	0.1098	0.02	469.83	4196.67
YLR386W	YLR386W ... VAC14 vacuole inheritance* enzyme activator activity vacuolar membrane (sensu Fungi)* | YLR387C	YPS1009	1	0.0874	0.8459	0.8198	0.0615	0.0146	0.1006	0.0035	1055.33	1333.78
YLL010C	YLL010C ... PSR1 response to stress phosphoprotein phosphatase activityplasma membrane | YLL011W	YPS1009	1	-0.0227	0.9198	0.5847	0.2766	0.0086	0.0948	0.0353	479.83	496.33
YLL032C	YLL032C ... YLL032C biological process unknown molecular function unknown cytoplasm | YLL033W	YPS1009	1	0.0169	0.868	0.6809	0.2112	0.0077	0.0905	0.0097	1080	610.33
YLR174W	YLR174W ... IDP2 glutamate biosynthesis* isocitrate dehydrogenase (NADP+) accytosol | YLR175W	YPS1009	1	-0.151	1.1773	0.5273	0.2598	0.0215	0.0854	0.1061	494.83	66.56
YLR287C-A	YLR287C-A ... RPS30A protein biosynthesis structural constituent of ribosome cytosolic small ribosomal subunit ( | YLR288C	YPS1009	1	0.0575	0.945	0.7461	0.0987	0.0356	0.0832	0.0365	153.17	23594.6
YLR263W	YLR263W ... RED1 synaptonemal complex formation molecular function unknown synaptonemal complex | YLR264C-A	YPS1009	1	-0.1146	1.0259	0.4289	0.4269	0.0051	0.0806	0.0585	1049	112.33
YLR288C	YLR288C ... MEC3 chromatin silencing at telomer DNA binding nucleus | YLR289W	YPS1009	1	0.0482	0.9745	0.717	0.125	0.0351	0.0797	0.0432	593	200.44
YHR007C	YHR007C ... ERG11 ergosterol biosynthesis sterol 14-demethylase activity endoplasmic reticulum | YHR007C-A	NCYC110	1	0.1213	0.7209	0.5096	0.3185	0.0903	0.0788	0.0028	761.83	23901.8
YLR014C	YLR014C ... PPR1 regulation of transcription, D transcription factor activity nucleus | YLR015W	YPS1009	1	0.0486	1.123	0.5054	0.0245	0.1653	0.0779	0.227	1025.17	762
YLR397C	YLR397C PAC cluster AFG2 response to drug ATPase activity intracellular | YLR398C	YPS1009	1	0.0382	1.0867	0.3298	0.0071	0.292	0.0776	0.2934	803.83	1769.78
YLR216C	YLR216C ... CPR6 protein folding unfolded protein binding* cytoplasm | YLR217W	YPS1009	1	0.0551	0.9793	0.7349	0.1092	0.0407	0.0746	0.0407	412.83	2438.89
YLR063W	YLR063W PAC cluster YLR063W biological process unknown molecular function unknown cytoplasm | YLR064W	YPS1009	1	0.0702	0.8963	0.836	0.0491	0.0331	0.0727	0.0092	389.33	406.11
YLR220W	YLR220W ... CCC1 iron ion homeostasis* molecular function unknown Golgi apparatus* | YLR221C	YPS1009	1	0.0751	0.9618	0.8038	0.0347	0.0644	0.0697	0.0274	389.17	920.11
YLR368W	YLR368W ... MDM30 mitochondrion organization and molecular function unknown mitochondrion | YLR369W	YPS1009	1	0.0367	1.1008	0.711	0.0669	0.0664	0.0635	0.0922	656.17	383.11
YLR272C	YLR272C ... YCS4 mitotic chromosome condensatio molecular function unknown nuclear condensin complex | YLR273C	YPS1009	1	-0.035	0.9481	0.5759	0.3474	0.004	0.0568	0.0159	1385.33	1243.33
YLR369W	YLR369W ... SSQ1 DNA-dependent DNA replication* unfolded protein binding mitochondrial matrix | YLR370C	YPS1009	1	-0.0155	0.9659	0.7093	0.1981	0.014	0.0538	0.0247	731	520.78
YLR148W	YLR148W ... PEP3 late endosome to vacuole trans protein binding vacuolar membrane (sensu Fungi)* | YLR149C	YPS1009	1	0.0238	0.9054	0.7822	0.1519	0.0086	0.0505	0.0067	1067.17	729.33
YLR290C	YLR290C iESR cluster YLR290C biological process unknown molecular function unknown mitochondrion | YLR291C	YPS1009	1	0.015	0.9872	0.7619	0.1351	0.0243	0.0504	0.0285	354	94.44
YLR009W	YLR009W PAC cluster RLP24 ribosomal large subunit biogen molecular function unknown nucleolus | YLR010C	YPS1009	1	-0.1737	1.2002	0.4581	0.3692	0.0071	0.0459	0.1197	297.17	2250.33
YLR412W	YLR412W … PAC cluster BER1 biological process unknown molecular function unknown | Protein involved in microtubule-related processes, N-acetylation; GFP-fusion protein localizes to the cytoplasm and is induced in response to the DNA-damaging agent MMS; YLR412W is not an essential gene; similar to Arabidopsis SRR1 geneYLR413W	YPS1009	1	-0.0428	1.062	0.7252	0.1716	0.0192	0.0411	0.0428	319.67	557.56
YLL036C	YLL036C PAC cluster PRP19 nuclear mRNA splicing, via spl "RNA splicing factor activity, trans"cytoplasm* | YLL037W	YPS1009	1	-0.1033	1.1556	0.6799	0.2051	0.0122	0.0359	0.0668	604.83	965.11
YLR359W	YLR359W ... ADE13 purine nucleotide biosynthesis adenylosuccinate lyase activity cellular component unknown | YLR360W	YPS1009	1	-0.0681	1.0157	0.56	0.3725	0.0037	0.0358	0.0281	551	4216.56
YLR024C	YLR024C ... UBR2 protein monoubiquitination* ubiquitin-protein ligase activity cytoplasm | YLR025W	YPS1009	1	0.033	0.9112	0.8921	0.0635	0.0074	0.0353	0.0017	2168.83	785.67
YLR057W	YLR057W ... YLR057W biological process unknown molecular function unknown cellular component unknown | YLR058C	YPS1009	1	0.0338	0.9722	0.8486	0.0782	0.0235	0.0342	0.0155	1000	1173.33
YLR381W	YLR381W ... CTF3 chromosome segregation protein binding condensed nuclear chromosome kineto | YLR382C	YPS1009	1	0.0285	1.0358	0.8344	0.0597	0.0398	0.0335	0.0326	784	381
YLR084C	YLR084C ... RAX2 bud site selection molecular function unknown mitochondrion* | YLR085C	YPS1009	1	0.0242	0.9947	0.8471	0.0799	0.0246	0.0303	0.018	1351.5	1395
YLR208W	YLR208W ... SEC13 ER to Golgi transport* structural molecule activity cytoplasm* | YLR209C	YPS1009	1	-0.0956	1.0838	0.6576	0.2648	0.0061	0.0284	0.0431	349.67	2266.22
YLR222C	YLR222C PAC cluster UTP13 processing of 20S pre-rRNA snoRNA binding small nucleolar ribonucleoprotein c | YLR223C	YPS1009	1	-0.1117	1.1944	0.7008	0.1696	0.0177	0.0283	0.0837	894	3461.44
YLR060W	YLR060W PAC cluster FRS1 phenylalanyl-tRNA aminoacylati phenylalanine-tRNA ligase activity cytoplasm* | YLR061W	YPS1009	1	-0.1326	1.1122	0.4459	0.4431	0.0028	0.0277	0.0806	682.83	6446.56
YLR128W	YLR128W ... DCN1 biological process unknown molecular function unknown cellular component unknown | YLR129W	YPS1009	1	-0.2577	1.5404	0.4893	0.1292	0.0214	0.0267	0.3334	374.33	53.33
YLR229C	YLR229C ... CDC42 establishment of cell polarity GTPase activity* plasma membrane* | YLR230W	YPS1009	1	0.0315	1.0136	0.8722	0.025	0.0541	0.0266	0.022	269.67	1356.78
YLR224W	YLR224W ... YLR224W ubiquitin-dependent protein ca protein binding ubiquitin ligase complex | YLR225C	YPS1009	1	-0.0856	1.0731	0.6704	0.2569	0.0073	0.0265	0.0388	470.67	679.33
YLR129W	YLR129W PAC cluster DIP2 processing of 20S pre-rRNA snoRNA binding small nucleolar ribonucleoprotein c | YLR130C	YPS1009	1	-0.1137	1.1064	0.6365	0.2785	0.0068	0.0251	0.0531	1151.17	4315.22
YLR096W	YLR096W ... KIN2 exocytosis protein kinase activity plasma membrane* | YLR097C	YPS1009	1	-0.0409	0.9995	0.5682	0.3921	0.0018	0.0234	0.0145	1340.5	1794.44
YLL007C	YLL007C ... YLL007C biological process unknown molecular function unknown cytoplasm | YLL008W	YPS1009	1	-0.1194	1.2182	0.7235	0.1525	0.0148	0.0213	0.0879	900.5	241.67
YLR274W	YLR274W … MCM5 DNA replication initiation* chromatin binding* cytoplasm* | Component of the hexameric MCM complex, which is important for priming origins of DNA replication in G1 and becomes an active ATP-dependent helicase that promotes DNA melting and elongation when activated by Cdc7p-Dbf4p in S-phaseYLR275W	YPS1009	1	0.0158	1.0582	0.8096	0.0201	0.0894	0.0213	0.0597	896.67	1062.89
YLR145W	YLR145W ... RMP1 rRNA processing* molecular function unknown cytoplasm* | YLR146C	YPS1009	1	-0.0438	1.1817	0.7513	0.1148	0.0257	0.0212	0.087	247.17	288.11
YLR002C	YLR002C PAC cluster NOC3 rRNA processing* protein binding* nucleus* | YLR003C	YPS1009	1	-0.266	1.4644	0.4119	0.2204	0.0066	0.0208	0.3403	875.83	2074.33
YLR238W	YLR238W ... FAR10 cell cycle arrest in response molecular function unknown endoplasmic reticulum | YLR239C	YPS1009	1	-0.2679	1.4272	0.4815	0.1919	0.0101	0.0195	0.2969	608.67	201.78
YLR451W	YLR451W ... LEU3 regulation of transcription fr specific RNA polymerase II transcrinucleus | YLR452C	YPS1009	1	-0.1022	1.1074	0.698	0.2306	0.0068	0.0187	0.0459	961	587
YLR301W	YLR301W ... YLR301W cotranslational protein-membra molecular function unknown endoplasmic reticulum membrane | YLR302C	YPS1009	1	-0.0842	1.2342	0.7466	0.1039	0.0209	0.0162	0.1124	335.17	744.11
YLR056W	YLR056W ... ERG3 ergosterol biosynthesis C-5 sterol desaturase activity endoplasmic reticulum | YLR057W	YPS1009	1	-0.0767	1.1175	0.8199	0.1121	0.015	0.0135	0.0395	451	18937.2
YHL038C	YHL038C ... CBP2 Group I intron splicing "RNA splicing factor activity, trans"mitochondrion | YHL039W	NCYC110	1	0.0596	0.9066	0.6085	0.2388	0.1361	0.0124	0.0042	705.83	780.62
YLR127C	YLR127C ... APC2 mitotic sister chromatid segre protein binding* anaphase-promoting complex | YLR128W	YPS1009	1	-0.029	1.1599	0.7628	0.0374	0.0443	0.0119	0.1436	1026.33	339.56
YLR384C	YLR384C ... IKI3 regulation of transcription fr RNA polymerase II transcription elotranscription elongation factor com | YLR385C	YPS1009	1	-0.0065	0.9858	0.8743	0.1017	0.0066	0.0119	0.0055	1548.83	7031.33
YHL013C	YHL013C … PAC cluster OTU2 biological process unknown molecular function unknown | Protein of unknown function that may interact with ribosomes, based on co-purification experiments; member of the ovarian tumor-like (OTU) superfamily of predicted cysteine proteases; shows cytoplasmic localizationYHL014C	NCYC110	1	0.0586	0.9195	0.5374	0.3238	0.1203	0.0118	0.0066	417.83	642.62
YLR443W	YLR443W ... ECM7 cell wall organization and bio molecular function unknown integral to membrane | YLR444C	YPS1009	1	-0.0565	1.0914	0.8482	0.1046	0.0113	0.0096	0.0263	569.83	512.33
YHR066W	YHR066W PAC cluster SSF1 ribosomal large subunit assemb rRNA binding nucleolus | YHR067W	NCYC110	1	0.0335	1.0441	0.508	0.2381	0.2255	0.0089	0.0195	572.17	2722.12
YHR191C	YHR191C ... CTF8 mitotic sister chromatid cohes molecular function unknown DNA replication factor C complex | YHR192W	NCYC110	1	0.028	1.0605	0.529	0.2065	0.2376	0.0068	0.02	183.5	253.88
YHR181W	YHR181W ... SVP26 biological process unknown molecular function unknown endoplasmic reticulum | YHR182C-A	NCYC110	1	-0.0089	1.1121	0.5266	0.2774	0.1659	0.0053	0.0248	320.67	516.75
YHL039W	YHL039W PAC cluster YHL039W biological process unknown molecular function unknown cytoplasm | YHL040C	NCYC110	1	0.014	1.01	0.6108	0.2606	0.1168	0.0046	0.0072	664.17	2459.88
YHR069C	YHR069C ... RRP4 35S primary transcript process 3'-5'-exoribonuclease activity nuclear exosome (RNase complex)* | YHR069C-A	NCYC110	1	0.011	0.9808	0.6335	0.2816	0.0768	0.0041	0.004	366.33	1041
YLR430W	YLR430W ... SEN1 35S primary transcript process ATP-dependent RNA helicase activitynucleus | YLR431C	YPS1009	1	-0.0186	1.042	0.9247	0.0545	0.0088	0.004	0.0079	2440.33	3489.56
YHR142W	YHR142W ... CHS7 ER to Golgi transport* molecular function unknown endoplasmic reticulum membrane | YHR143W	NCYC110	1	-0.0367	1.1343	0.5821	0.2532	0.1355	0.0032	0.026	397.33	930.88
YHR060W	YHR060W ... VMA22 protein complex assembly* unfolded protein binding endoplasmic reticulum membrane | YHR061C	NCYC110	1	-0.0665	1.3135	0.3933	0.1338	0.1821	0.0022	0.2885	254.67	497.25
YHR027C	YHR027C ... RPN1 ubiquitin-dependent protein ca endopeptidase activity* cytoplasm* | YHR028C	NCYC110	1	-0.1136	1.1846	0.4629	0.4472	0.0488	0.0019	0.0392	1290	8446.5
YHR101C	YHR101C ... BIG1 cell wall biosynthesis (sensu molecular function unknown endoplasmic reticulum* | YHR102W	NCYC110	1	-0.0772	1.153	0.541	0.3777	0.0545	0.0019	0.0249	487.17	443.12
YHR072W	YHR072W ... ERG7 ergosterol biosynthesis lanosterol synthase activity endoplasmic reticulum* | YHR072W-A	NCYC110	1	-0.0828	1.1035	0.4935	0.4644	0.0261	0.0015	0.0145	884.67	4927.12
YHR042W	YHR042W PAC cluster NCP1 ergosterol biosynthesis electron transporter activity mitochondrion* | YHR043C	NCYC110	1	-0.0351	1.0978	0.6989	0.1776	0.1048	0.0011	0.0177	720.33	7759.62
YHL007C	YHL007C ... STE20 protein amino acid phosphoryla protein serine/threonine kinase actincipient bud site* | YHL008C	NCYC110	1	-0.036	1.06	0.6247	0.3408	0.0273	0.0008	0.0064	1128.83	2134.25
YHL017W	YHL017W ... YHL017W biological process unknown molecular function unknown clathrin-coated vesicle | YHL018W	NCYC110	1	-0.0615	1.1262	0.7029	0.2064	0.0582	0.0006	0.0319	737.5	1253.12
YLR150W	YLR150W PAC cluster STM1 telomere maintenance* DNA binding* cytoplasm* | YLR151C	YPS1009	2a	-0.3323	0.7658	0	0.5008	0	0.4817	0.0175	325.67	25807.7
YLL028W	YLL028W ... TPO1 polyamine transport spermine transporter activity* plasma membrane* | YLL029W	YPS1009	2a	-0.0632	0.7251	0.0001	0.5075	0	0.47	0.0224	717.67	626.44
YLR134W	YLR134W PAC cluster PDC5 pyruvate metabolism* pyruvate decarboxylase activity cytoplasm* | YLR135W	YPS1009	2a	-0.0611	0.6961	0.0238	0.486	0.0002	0.4651	0.0249	736	157.56
YLR183C	YLR183C PAC cluster TOS4 G1/S-specific transcription in transcription factor activity cytoplasm* | YLR184W	YPS1009	2a	-0.2624	0.7735	0	0.518	0	0.4647	0.0173	582.67	877.56
YLR188W	YLR188W ... MDL1 oligopeptide transport ATPase activity* mitochondrial inner membrane | YLR189C	YPS1009	2a	-0.4622	0.7348	0	0.5234	0	0.449	0.0276	735.33	869.44
YLR408C	YLR408C ... YLR408C biological process unknown molecular function unknown endosome | YLR409C	YPS1009	2a	-0.4019	0.6571	0.0001	0.4952	0	0.4399	0.0649	171.17	29.89
YLR094C	YLR094C ... GIS3 intracellular signaling cascad molecular function unknown cytoplasm* | YLR095C	YPS1009	2a	-0.1289	0.7705	0.0004	0.5434	0	0.4362	0.02	479.67	188.56
YLR185W	YLR185W RP cluster RPL37A protein biosynthesis structural constituent of ribosome cytosolic large ribosomal subunit ( | YLR186W	YPS1009	2a	-0.0692	0.7655	0.0017	0.5428	0	0.4348	0.0208	200.67	5530.78
YHL015W	YHL015W ... RPS20 protein biosynthesis structural constituent of ribosome cytosolic small ribosomal subunit ( | YHL015W-A	NCYC110	2a	0.0766	0.7797	0.1014	0.4642	0.003	0.4307	0.0007	198.33	16705.9
YLR149C	YLR149C iESR cluster YLR149C biological process unknown molecular function unknown cellular component unknown | YLR149C-A	YPS1009	2a	-0.5195	0.6499	0.001	0.5026	0	0.4296	0.0666	829.5	21.11
YLR173W	YLR173W ... YLR173W biological process unknown molecular function unknown cellular component unknown | YLR174W	YPS1009	2a	-0.0457	0.7111	0.0665	0.493	0.0007	0.4126	0.0272	700.17	200.33
YLR197W	YLR197W … PAC cluster NOP56 (SIK1) RNA catabolism exoribonuclease II activity mitochondrion* | Essential evolutionarily-conserved nucleolar protein component of the box C/D snoRNP complexes that direct 2'-O-methylation of pre-rRNA during its maturation; overexpression causes spindle orientation defectsYLR198C	YPS1009	2a	-0.1295	0.8411	0	0.5793	0	0.4085	0.0123	588	12808.9
YLL002W	YLL002W ... RTT109 negative regulation of DNA tra molecular function unknown nucleus | YLL003W	YPS1009	2a	-0.2846	0.7328	0.0001	0.5651	0	0.3978	0.0369	552.17	249.22
YLR284C	YLR284C ... ECI1 fatty acid beta-oxidation dodecenoyl-CoA delta-isomerase actiperoxisome | YLR285C-A	YPS1009	2a	-0.5292	0.7545	0	0.5706	0	0.3894	0.0401	353.67	46
YLR028C	YLR028C ... ADE16 aerobic respiration* IMP cyclohydrolase activity* cytosol | YLR029C	YPS1009	2a	-0.1302	0.8406	0	0.6135	0	0.3715	0.015	698.67	2401.67
YLR187W	YLR187W ... SKG3 biological process unknown molecular function unknown cytoplasm* | YLR188W	YPS1009	2a	-0.005	0.815	0.0718	0.5485	0.0003	0.3633	0.0161	1157.17	966.11
YLR419W	YLR419W ... YLR419W biological process unknown helicase activity cytoplasm* | YLR420W	YPS1009	2a	-0.1104	0.8246	0.0014	0.6237	0	0.3551	0.0198	1571.67	1854.22
YLR204W	YLR204W ... QRI5 biological process unknown molecular function unknown mitochondrion | YLR205C	YPS1009	2a	-0.8417	0.8773	0	0.6104	0	0.3414	0.0481	154	319.33
YLR326W	YLR326W ... YLR326W biological process unknown molecular function unknown cellular component unknown | YLR327C	YPS1009	2a	-0.5087	0.7878	0	0.6056	0	0.3402	0.0543	279.5	96
YLR052W	YLR052W ... IES3 chromatin remodeling molecular function unknown nucleus* | YLR053C	YPS1009	2a	-0.1815	0.7919	0.0013	0.6269	0	0.3317	0.0401	337.83	415.56
YLR335W	YLR335W ... NUP2 mRNA-nucleus export* structural molecule activity mitochondrion* | YLR336C	YPS1009	2a	-0.1556	0.82	0.0004	0.6471	0	0.3253	0.0272	889.5	1658.67
YLR077W	YLR077W ... FMP25 biological process unknown molecular function unknown mitochondrion | YLR078C	YPS1009	2a	-0.2649	0.803	0	0.632	0	0.3208	0.0472	629.17	399.67
YLL043W	YLL043W ... FPS1 transport* transporter activity* cytoplasm* | YLL044W	YPS1009	2a	-0.028	0.8495	0.0129	0.6585	0	0.3096	0.0189	776	1721.11
YLR218C	YLR218C ... YLR218C biological process unknown molecular function unknown cytoplasm* | YLR219W	YPS1009	2a	-1.146	0.949	0	0.6348	0	0.308	0.0572	181.83	87.11
YLR260W	YLR260W ... LCB5 response to heat* D-erythro-sphingosine kinase activimembrane fraction* | YLR261C	YPS1009	2a	-0.2043	0.8153	0.0001	0.6526	0	0.3078	0.0395	872.83	405
YLR055C	YLR055C ... SPT8 histone acetylation* transcription cofactor activity nucleus* | YLR056W	YPS1009	2a	-0.3305	0.828	0	0.6284	0	0.3069	0.0647	663	382.11
YLR262C-A	YLR262C-A ... TMA7 biological process unknown molecular function unknown cytoplasm* | Protein of unknown that associates with ribosomes; null mutant exhibits translation defects, altered polyribosome profiles, and resistance to the translation inhibitor anisomcyinYLR263W	YPS1009	2a	-0.2524	0.8603	0	0.6856	0	0.2945	0.02	119.33	655.78
YLR021W	YLR021W … IRC25 biological process unknown molecular function unknown | Component of a heterodimeric Poc4p-Irc25p chaperone involved in assembly of alpha subunits into the 20S proteasome; may regulate formation of proteasome isoforms with alternative subunits under different conditionsYLR022C	YPS1009	2a	-0.2271	0.8301	0.0003	0.6674	0	0.2937	0.0387	249.33	362.33
YLR206W	YLR206W ... ENT2 endocytosis* clathrin binding actin cortical patch | YLR207W	YPS1009	2a	-0.0186	0.8476	0.0382	0.6486	0.0002	0.2926	0.0205	659.5	1214.44
YLR079W	YLR079W ... SIC1 G1/S transition of mitotic cel protein binding* cytoplasm* | YLR080W	YPS1009	2a	-0.3685	0.8769	0.0003	0.6425	0	0.279	0.0783	355.5	424.33
YLR321C	YLR321C ... SFH1 chromatin remodeling protein binding RSC complex | YLR322W	YPS1009	2a	-0.4053	0.8485	0	0.6756	0	0.2773	0.0471	555.67	718.22
YHR009C	YHR009C ... YHR009C biological process unknown molecular function unknown cytoplasm | YHR010W	NCYC110	2a	-0.0746	0.763	0	0.733	0	0.2655	0.0015	668.5	1811.38
YHR162W	YHR162W ... YHR162W biological process unknown molecular function unknown mitochondrion | YHR163W	NCYC110	2a	-0.1517	0.803	0	0.736	0	0.2628	0.0012	148.67	1577.12
YLR072W	YLR072W ... YLR072W biological process unknown molecular function unknown cytoplasm | YLR073C	YPS1009	2a	-0.6438	0.9806	0	0.6415	0	0.2616	0.0969	720.5	294
YLR076C	YLR076C PAC cluster | YLR077W	YPS1009	2a	-0.053	0.7196	0.3165	0.3412	0.0138	0.2584	0.0701	188.33	350.11
YLR149C-A	YLR149C-A ... | YLR150W	YPS1009	2a	-1.0077	2.3354	0.2071	0.3323	0.0218	0.2492	0.1896	69.83	5.89
YLL044W	YLL044W RP cluster | YLL045C	YPS1009	2a	-0.4435	1.0137	0.0348	0.5869	0.0007	0.2462	0.1315	150.83	214.11
YLR099W-A	YLR099W-A ... YLR099W-A biological process unknown molecular function unknown cellular component unknown | YLR100W	YPS1009	2a	-0.1699	0.8873	0.0632	0.611	0.0007	0.2429	0.0821	120	199.44
YLR011W	YLR011W ... LOT6 biological process unknown FMN reductase activity cytoplasm* | YLR012C	YPS1009	2a	-0.6965	1.1238	0.001	0.6383	0	0.2372	0.1235	242.17	66.22
YLR086W	YLR086W ... SMC4 mitotic sister chromatid segre ATPase activity nuclear condensin complex | YLR087C	YPS1009	2a	-0.0957	0.8709	0.0357	0.6979	0.0002	0.2266	0.0396	1570	963.56
YLR429W	YLR429W ... CRN1 actin filament organization* "protein binding, bridging*" actin cortical patch | YLR430W	YPS1009	2a	-0.0581	0.848	0.1646	0.58	0.0014	0.2254	0.0287	720.83	3718.78
YLR102C	YLR102C ... APC9 mitotic sister chromatid segre protein binding* anaphase-promoting complex | YLR103C	YPS1009	2a	-0.3766	0.9226	0	0.706	0	0.2239	0.0702	318	75.89
YLR344W	YLR344W RP cluster RPL26A protein biosynthesis structural constituent of ribosome*cytosolic large ribosomal subunit ( | YLR345W	YPS1009	2a	-0.1564	0.8835	0.0001	0.7448	0	0.2197	0.0354	203.17	4195.33
YLR323C	YLR323C ... CWC24 biological process unknown molecular function unknown spliceosome complex | YLR324W	YPS1009	2a	-0.2763	0.899	0.0005	0.7372	0	0.2127	0.0496	319.67	290.78
YLR406C	YLR406C ... RPL31B protein biosynthesis structural constituent of ribosome cytosolic large ribosomal subunit ( | YLR406C-A	YPS1009	2a	-0.493	0.9224	0	0.7327	0	0.2099	0.0574	202.83	7080
YLR117C	YLR117C ... CLF1 nuclear mRNA splicing, via spl molecular function unknown spliceosome complex* | YLR118C	YPS1009	2a	-0.4524	0.954	0	0.7391	0	0.1897	0.0712	871.67	367.89
YLL039C	YLL039C iESR cluster UBI4 response to stress* protein tag* cytoplasm | YLL040C	YPS1009	2a	-0.1478	0.9206	0.1398	0.603	0.0017	0.1874	0.0681	534	361
YLR175W	YLR175W PAC cluster CBF5 rRNA modification* pseudouridylate synthase activity small nucleolar ribonucleoprotein c | YLR176C	YPS1009	2a	-0.1194	0.9069	0.0193	0.7526	0.0001	0.1874	0.0406	661.17	5621.22
YLR389C	YLR389C ... STE23 proteolysis and peptidolysis* metallopeptidase activity integral to membrane | YLR390W	YPS1009	2a	-0.1381	0.9154	0	0.7987	0	0.1823	0.0191	1130.67	2582
YLL008W	YLL008W PAC cluster DRS1 35S primary transcript process ATP-dependent RNA helicase activitynucleolus | YLL009C	YPS1009	2a	-0.108	0.9089	0.1352	0.6247	0.0012	0.1819	0.057	901.5	3022.67
YLR442C	YLR442C ... SIR3 double-strand break repair via histone binding* mitochondrion* | YLR443W	YPS1009	2a	-0.2309	0.9306	0.0002	0.7657	0	0.1788	0.0554	1118.67	634.67
YHR013C	YHR013C PAC cluster ARD1 protein amino acid acetylation peptide alpha-N-acetyltransferase acytoplasm* | YHR014W	NCYC110	2a	-0.1654	0.7325	0	0.8193	0	0.1784	0.0023	322.83	716
YLR045C	YLR045C ... STU2 mitotic spindle organization a structural constituent of cytoskelespindle pole body* | YLR046C	YPS1009	2a	-0.1071	0.9154	0.0775	0.6913	0.0005	0.1781	0.0527	1178.33	1182.22
YLL045C	YLL045C RP cluster RPL8B protein biosynthesis structural constituent of ribosome cytosolic large ribosomal subunit ( | YLL046C	YPS1009	2a	-0.1549	0.9118	0.0001	0.7912	0	0.1779	0.0308	232	26936.6
YLL029W	YLL029W … FRA1 biological process unknown molecular function unknown | Protein involved in negative regulation of transcription of iron regulon; forms an iron independent complex with Fra2p, Grx3p, and Grx4p; cytosolic; mutant fails to repress transcription of iron regulon and is defective in spore formationYLL030C	YPS1009	2a	-0.1193	0.9168	0.007	0.7731	0	0.1773	0.0425	854.5	1465.56
YLR189C	YLR189C ... ATG26 sterol metabolism sterol 3-beta-glucosyltransferase acytoplasm | YLR190W	YPS1009	2a	-0.245	0.9204	0	0.7931	0	0.1717	0.0353	1347.83	918.22
YLR095C	YLR095C ... IOC2 chromatin remodeling protein binding ISW1 complex | YLR096W	YPS1009	2a	-0.2976	0.9944	0.0002	0.7422	0	0.1684	0.0892	867.33	700
YLL038C	YLL038C PAC cluster ENT4 endocytosis* clathrin binding actin cortical patch | YLL039C	YPS1009	2a	-0.352	1.0076	0	0.7427	0	0.1682	0.0891	292.83	322.67
YLR230W	YLR230W ... | YLR231C	YPS1009	2a	-0.3858	1.3737	0.288	0.3657	0.0158	0.1667	0.1638	178.67	22.89
YLR195C	YLR195C ... NMT1 N-terminal peptidyl-glycine N- glycylpeptide N-tetradecanoyltransfcytosol | YLR196W	YPS1009	2a	-0.2066	0.9715	0.0295	0.7288	0.0002	0.1644	0.077	523.17	686.44
YLR082C	YLR082C ... SRL2 nucleobase, nucleoside, nucleo molecular function unknown cytoplasm* | YLR083C	YPS1009	2a	-0.2107	0.94	0	0.7874	0	0.1624	0.0502	464.5	145
YLR116W	YLR116W ... MSL5 nuclear mRNA splicing, via spl RNA binding commitment complex | YLR117C	YPS1009	2a	-0.3394	1.0049	0.0002	0.748	0	0.1619	0.0899	564.33	113.67
YHR219W	YHR219W ... YHR219W biological process unknown molecular function unknown cellular component unknown | YIL001W	NCYC110	2a	-0.2829	0.4908	0	0.8318	0	0.1606	0.0075	101.5	98.5
YLR068W	YLR068W ... FYV7 processing of 20S pre-rRNA molecular function unknown nucleus* | YLR069C	YPS1009	2a	-1.2236	1.6626	0	0.6222	0	0.1527	0.2251	225.5	149.78
YLR226W	YLR226W ... BUR2 mitotic sister chromatid segre cyclin-dependent protein kinase regnucleus | YLR227C	YPS1009	2a	-0.041	0.8686	0.3729	0.4426	0.0038	0.1524	0.0283	510.67	322.11
YLR240W	YLR240W ... VPS34 protein amino acid phosphoryla protein kinase activity* membrane fraction | YLR241W	YPS1009	2a	-0.1601	0.9379	0.0006	0.8061	0	0.151	0.0423	1039.33	518.89
YLL048C	YLL048C ... YBT1 bile acid transport "ATPase activity, coupled to transme"vacuole (sensu Fungi) | YLL049W	YPS1009	2a	-0.024	0.8926	0.331	0.5027	0.0017	0.1504	0.0141	1900.17	12031.8
YLR073C	YLR073C … PAC cluster RFU1 biological process unknown molecular function unknown | Protein that inhibits Doa4p deubiquitinating activity; contributes to ubiquitin homeostasis by regulating the conversion of free ubiquitin chains to ubiquitin monomers by Doa4p; GFP-fusion protein localizes to endosomesYLR074C	YPS1009	2a	-0.2346	0.9644	0	0.7953	0	0.1465	0.0582	242.67	777.78
YLR423C	YLR423C ... ATG17 autophagy kinase activator activity cytoplasm | YLR424W	YPS1009	2a	-0.4527	1.0825	0.0022	0.7326	0	0.1448	0.1204	492.83	86.44
YLR270W	YLR270W iESR cluster DCS1 deadenylylation-dependent deca "hydrolase activity, acting on acid"cytoplasm* | YLR271W	YPS1009	2a	-0.2758	0.949	0	0.8102	0	0.1442	0.0457	453.83	340.33
YLR427W	YLR427W ... MAG2 DNA dealkylation alkylbase DNA N-glycosylase activitcytoplasm | YLR428C	YPS1009	2a	-0.2329	0.9608	0.0001	0.8008	0	0.1435	0.0556	730.5	829.56
YLR103C	YLR103C ... CDC45 DNA replication initiation* DNA binding pre-replicative complex* | YLR104W	YPS1009	2a	-0.277	1.0396	0.0033	0.7677	0	0.1308	0.0981	792.33	653.67
YLR186W	YLR186W PAC cluster EMG1 35S primary transcript process snoRNA binding cytoplasm* | YLR187W	YPS1009	2a	-0.26	0.9744	0	0.8139	0	0.1301	0.056	311.33	1104.11
YLR466W	YLR466W ... YRF1-4 telomerase-independent telomer DNA helicase activity nucleus | YLR467W	YPS1009	2a	-8.7318	-1.9118	0.1852	0.5991	0.0059	0.1275	0.0822	31.17	14.67
YLL018C	YLL018C ... DPS1 protein biosynthesis RNA binding* cytoplasm | YLL018C-A	YPS1009	2a	-0.3589	0.9568	0	0.8336	0	0.1274	0.039	656.67	4857.22
YLR192C	YLR192C ... HCR1 protein biosynthesis* translation initiation factor activeukaryotic translation initiation f | YLR193C	YPS1009	2a	-0.2027	0.9856	0.0015	0.8065	0	0.1273	0.0646	305	2863.89
YLL022C	YLL022C ... HIF1 chromatin silencing at telomer molecular function unknown nucleus* | YLL023C	YPS1009	2a	-0.4782	1.1648	0	0.7231	0	0.1266	0.1503	458.83	351.67
YHL025W	YHL025W ... SNF6 chromatin remodeling general RNA polymerase II transcripSWI/SNF complex* | YHL026C	NCYC110	2a	-0.1175	0.7084	0	0.8717	0	0.1249	0.0034	364	412.38
YLR457C	YLR457C ... NBP1 biological process unknown molecular function unknown nucleus | YLR458W	YPS1009	2a	-0.5091	1.1652	0	0.7303	0	0.1247	0.145	404.33	103.11
YLR170C	YLR170C ... APS1 vesicle-mediated transport clathrin binding AP-1 adaptor complex | YLR171W	YPS1009	2a	-0.3684	0.9697	0	0.8248	0	0.1239	0.0513	200.67	272.11
YLR026C	YLR026C ... SED5 ER to Golgi transport* t-SNARE activity Golgi cis-face | YLR027C	YPS1009	2a	-0.1109	0.9554	0.2563	0.5683	0.0026	0.1221	0.0507	427.67	451.22
YLR036C	YLR036C ... YLR036C biological process unknown molecular function unknown cellular component unknown | YLR037C	YPS1009	2a	-0.1712	0.9985	0.0223	0.7848	0.0001	0.1207	0.072	281.5	62.89
YLR362W	YLR362W ... STE11 protein amino acid phosphoryla MAP kinase kinase kinase activity cytoplasm | YLR363C	YPS1009	2a	-0.0829	0.9332	0.4085	0.4219	0.0067	0.1185	0.0445	775.67	230.67
YLL049W	YLL049W … LDB18 biological process unknown molecular function unknown | Protein of unknown function; required for nuclear migration; null mutant shows a reduced affinity for the alcian blue dye suggesting a decreased net negative charge of the cell surfaceYLL050C	YPS1009	2a	-1.106	1.0134	0	0.8164	0	0.1182	0.0653	195.67	68.89
YLR407W	YLR407W ... YLR407W biological process unknown molecular function unknown cellular component unknown | YLR408C	YPS1009	2a	-0.1675	0.956	0	0.8503	0	0.116	0.0336	289.17	552.67
YLR257W	YLR257W ... YLR257W biological process unknown molecular function unknown cytoplasm | YLR258W	YPS1009	2a	-0.4772	1.1811	0	0.7229	0	0.1155	0.1616	423	1906.67
YLR275W	YLR275W ... SMD2 nuclear mRNA splicing, via spl "RNA splicing factor activity, trans"U4/U6 x U5 tri-snRNP complex | YLR276C	YPS1009	2a	-0.9169	1.4667	0	0.6406	0	0.1137	0.2456	215	187.33
YLR210W	YLR210W ... CLB4 G2/M transition of mitotic cel cyclin-dependent protein kinase regcytoplasm* | YLR211C	YPS1009	2a	-0.2784	1.0401	0.0001	0.7941	0	0.1133	0.0925	550	233.89
YHR122W	YHR122W ... YHR122W transcription molecular function unknown cytoplasm* | YHR123W	NCYC110	2a	0.0843	0.6392	0.1168	0.7579	0.0095	0.1116	0.0042	299.83	321.25
YLR025W	YLR025W ... SNF7 late endosome to vacuole trans molecular function unknown cytoplasm* | YLR026C	YPS1009	2a	-0.6853	1.7933	0.1049	0.4875	0.0019	0.1112	0.2946	225.83	207.56
YLR043C	YLR043C ... TRX1 response to oxidative stress* thiol-disulfide exchange intermediacytosol* | YLR044C	YPS1009	2a	-0.3796	1.1888	0.0043	0.7153	0	0.1111	0.1692	101.17	2981.33
YHR047C	YHR047C … AAP1 proteolysis and peptidolysis* aminopeptidase activity cytoplasm* | Arginine/alanine aminopeptidase, overproduction stimulates glycogen accumulationYHR048W	NCYC110	2a	0.1074	0.719	0.3465	0.5104	0.0313	0.1097	0.0021	1019.17	5228.12
YLR228C	YLR228C ... ECM22 sterol biosynthesis RNA polymerase II transcription facnucleus | YLR229C	YPS1009	2a	-0.2394	1.0185	0.0002	0.8154	0	0.1082	0.0762	1048.83	353.56
YLL040C	YLL040C ... VPS13 sporulation (sensu Fungi)* molecular function unknown mitochondrion* | YLL041C	YPS1009	2a	-0.128	0.9829	0.1284	0.7079	0.0009	0.108	0.0548	3622.17	2015.89
YLR143W	YLR143W ... YLR143W biological process unknown molecular function unknown cytoplasm | YLR144C	YPS1009	2a	-0.2178	1.0293	0.0104	0.7973	0.0001	0.1078	0.0844	808.67	615.67
YLR200W	YLR200W ... YKE2 protein folding* tubulin binding cytoplasm* | YLR201C	YPS1009	2a	-0.4545	1.168	0.0007	0.731	0	0.1077	0.1607	168.5	610.22
YLR037C	YLR037C ... DAN2 biological process unknown molecular function unknown cell wall (sensu Fungi) | YLR038C	YPS1009	2a	-0.6202	1.9099	0.1765	0.4068	0.006	0.1074	0.3032	184.67	10.89
YLR135W	YLR135W ... SLX4 DNA replication* 5'-flap endonuclease activity nucleus | YLR136C	YPS1009	2a	-0.2863	1.162	0.1214	0.6262	0.0014	0.1073	0.1437	983.83	261.11
YHR198C	YHR198C … AIM18 biological process unknown molecular function unknown mitochondrion | Putative protein of unknown function; the authentic, non-tagged protein is detected in highly purified mitochondria in high-throughput studies; null mutant displays elevated frequency of mitochondrial genome lossYHR199C	NCYC110	2a	-0.3954	0.8176	0	0.8931	0	0.1049	0.002	406.83	305.75
YLR104W	YLR104W ... YLR104W biological process unknown molecular function unknown cellular component unknown | YLR105C	YPS1009	2a	-0.5784	1.1421	0	0.7572	0	0.1042	0.1387	193	237.22
YLR106C	YLR106C ... MDN1 rRNA processing* ATPase activity nucleus* | YLR107W	YPS1009	2a	-0.0528	0.9403	0.3001	0.5729	0.0016	0.0991	0.0263	5811	15700.9
YHR041C	YHR041C ... SRB2 transcription from RNA polymer RNA polymerase II transcription medmediator complex | YHR042W	NCYC110	2a	-0.5185	0.7415	0	0.8979	0	0.0981	0.004	223.67	152.25
YLL056C	YLL056C ... YLL056C biological process unknown molecular function unknown cellular component unknown | YLL057C	YPS1009	2a	-0.4659	1.0784	0	0.7991	0	0.0971	0.1038	296.5	32.11
YLR223C	YLR223C ... IFH1 rRNA processing* transcription factor activity nucleus* | YLR224W	YPS1009	2a	-0.4468	1.2762	0.0078	0.6781	0.0001	0.0959	0.2182	1366.5	1336.67
YLR342W-A	YLR342W-A ... YLR342W-A biological process unknown molecular function unknown cellular component unknown | YLR343W	YPS1009	2a	-0.8021	1.6397	0.1432	0.4963	0.0038	0.0956	0.261	70.67	23.67
YLR166C	YLR166C ... SEC10 establishment of cell polarity protein binding exocyst | YLR167W	YPS1009	2a	-0.1128	0.994	0.1342	0.7155	0.0007	0.0953	0.0543	1064	1067.22
YLR074C	YLR074C PAC cluster BUD20 bud site selection molecular function unknown nucleus | YLR075W	YPS1009	2a	-0.332	1.211	0.0629	0.6609	0.0007	0.0943	0.1812	198.67	651
YLR182W	YLR182W ... SWI6 meiosis* protein binding* cytoplasm* | YLR183C	YPS1009	2a	-0.1343	1.0154	0.2092	0.6341	0.0017	0.0912	0.0639	916	1100.78
YLR383W	YLR383W ... SMC6 DNA repair* molecular function unknown nucleus* | YLR384C	YPS1009	2a	-0.2994	1.1051	0.001	0.7807	0	0.0903	0.128	1274	584.56
YLR107W	YLR107W ... REX3 RNA processing 3'-5' exonuclease activity cytoplasm* | YLR108C	YPS1009	2a	-0.414	1.065	0	0.8133	0	0.0892	0.0975	557.5	275.67
YLR435W	YLR435W PAC cluster TSR2 processing of 20S pre-rRNA molecular function unknown cytoplasm* | YLR436C	YPS1009	2a	-1.0255	1.6585	0	0.5556	0	0.0881	0.3563	270.83	1239.22
YLR090W	YLR090W ... XDJ1 biological process unknown chaperone regulator activity nucleus* | YLR091W	YPS1009	2a	-0.428	1.1253	0	0.7777	0	0.0866	0.1357	475.83	589.44
YLR179C	YLR179C ... YLR179C biological process unknown molecular function unknown cytoplasm* | YLR180W	YPS1009	2a	-1.1354	1.1785	0	0.7677	0	0.0862	0.1461	186.33	575.67
YLR410W	YLR410W ... VIP1 actin cytoskeleton organizatio molecular function unknown cytoplasm | YLR411W	YPS1009	2a	-0.0982	0.9801	0.0154	0.8642	0	0.0844	0.036	1321.5	2050.78
YLR314C	YLR314C ... CDC3 cell wall organization and bio structural constituent of cytoskeleprospore membrane* | YLR315W	YPS1009	2a	-0.2561	1.1481	0.0598	0.7055	0.0005	0.0836	0.1507	543	1556.33
YHR202W	YHR202W ... YHR202W biological process unknown molecular function unknown vacuole (sensu Fungi)* | YHR203C	NCYC110	2a	-0.0538	0.8535	0	0.9152	0	0.0832	0.0016	703.33	336.12
YLR113W	YLR113W ... HOG1 protein amino acid phosphoryla MAP kinase activity cytoplasm* | YLR114C	YPS1009	2a	-0.2377	0.9877	0	0.8804	0	0.0808	0.0389	523.33	1983
YLL003W	YLL003W ... SFI1 G2/M transition of mitotic cel molecular function unknown half bridge of spindle pole body | YLL004W	YPS1009	2a	-0.2025	1.0239	0	0.8535	0	0.0797	0.0668	1221.5	492.11
YLR262C	YLR262C ... YPT6 intracellular protein transpor GTPase activity Golgi apparatus | YLR262C-A	YPS1009	2a	-0.1779	1.0778	0.2947	0.5346	0.0041	0.0795	0.087	142.5	352.89
YLL067C	YLL067C ... YLL067C biological process unknown helicase activity cellular component unknown | YLR001C	YPS1009	2a	3.2571	2.222	0.1484	0.6194	0.0033	0.0791	0.1498	27.33	19.78
YLL066C	YLL066C ... YLL066C biological process unknown helicase activity cellular component unknown | YLL066W-B	YPS1009	2a	3.6393	2.4709	0.1352	0.6015	0.0036	0.0762	0.1836	21.5	16.11
YHL004W	YHL004W ... MRP4 protein biosynthesis structural constituent of ribosome*mitochondrial small ribosomal subun | YHL005C	NCYC110	2a	-0.2755	0.7134	0	0.9187	0	0.0759	0.0054	474.33	735.75
YLR352W	YLR352W ... YLR352W biological process unknown molecular function unknown cellular component unknown | YLR353W	YPS1009	2a	-0.152	1.0644	0.2843	0.558	0.0028	0.0754	0.0794	907.33	280.44
YLR017W	YLR017W PAC cluster MEU1 glutamate biosynthesis* S-methyl-5-thioadenosine phosphorylcytoplasm | YLR018C	YPS1009	2a	-0.5425	1.0132	0	0.8766	0	0.0727	0.0507	423.17	1646.56
YLL062C	YLL062C ... MHT1 sulfur amino acid metabolism homocysteine S-methyltransferase accytoplasm | YLL063C	YPS1009	2a	-0.3769	1.3424	0.2293	0.485	0.0037	0.0695	0.2124	308	88.89
YLR032W	YLR032W ... RAD5 DNA repair ATPase activity nuclear chromatin | YLR033W	YPS1009	2a	-0.3059	1.1174	0	0.7934	0	0.0695	0.1371	1395.33	592.44
YLR306W	YLR306W ... UBC12 protein monoubiquitination* ubiquitin conjugating enzyme activicellular component unknown | YLR307C-A	YPS1009	2a	-0.4788	1.3529	0.0053	0.6205	0	0.0683	0.3059	281.17	64.44
YLR211C	YLR211C ... YLR211C biological process unknown molecular function unknown cytoplasm | YLR212C	YPS1009	2a	-0.9052	1.7074	0.0042	0.5074	0	0.0669	0.4215	306.17	30.67
YLR449W	YLR449W PAC cluster FPR4 biological process unknown peptidyl-prolyl cis-trans isomerasenucleus | YLR450W	YPS1009	2a	-0.8557	1.7216	0.0052	0.4899	0.0001	0.0631	0.4419	476.33	2526.11
YLL011W	YLL011W PAC cluster SOF1 rRNA modification* snoRNA binding small nucleolar ribonucleoprotein c | YLL012W	YPS1009	2a	-0.5019	1.5784	0.1798	0.4255	0.0029	0.0616	0.3301	652	2191.67
YLR215C	YLR215C ... CDC123 regulation of mitotic cell cyc molecular function unknown cytoplasm | YLR216C	YPS1009	2a	-0.239	1.2291	0.181	0.5655	0.0019	0.0612	0.1904	414	318.78
YLR309C	YLR309C ... IMH1 vesicle-mediated transport molecular function unknown cytosol* | YLR310C	YPS1009	2a	-0.365	1.2336	0.0009	0.6969	0	0.0583	0.2439	1171.33	965
YLR455W	YLR455W ... YLR455W biological process unknown molecular function unknown nucleus | YLR456W	YPS1009	2a	-0.344	1.3565	0.1838	0.498	0.002	0.0576	0.2587	337.67	538.11
YHR147C	YHR147C ... MRPL6 protein biosynthesis structural constituent of ribosome mitochondrial large ribosomal subun | YHR148W	NCYC110	2a	0.0648	0.7137	0.3929	0.4862	0.0598	0.057	0.0041	291.83	560
YHR005C-A	YHR005C-A ... TIM10 mitochondrial inner membrane p unfolded protein binding* mitochondrial intermembrane space* | Essential protein of the mitochondrial intermembrane space, forms a complex with Tim9p (TIM10 complex) that mediates insertion of hydrophobic proteins at the inner membrane, has homology to Mrs5p, which is also involved in this processYHR006W	NCYC110	2a	-0.0613	0.7604	0.0165	0.9218	0.0009	0.0561	0.0047	161	1252.5
YLL034C	YLL034C PAC cluster RIX7 ribosomal large subunit-nucleu ATPase activity* nucleus* | YLL035W	YPS1009	2a	-0.3214	1.2936	0.1408	0.5557	0.0014	0.0554	0.2468	1010	2362
YLR172C	YLR172C PAC cluster DPH5 peptidyl-diphthamide biosynthe diphthine synthase activity cytoplasm | YLR173W	YPS1009	2a	-0.2773	1.2336	0.1678	0.5756	0.0016	0.0551	0.1999	359.83	1805.67
YLL058W	YLL058W ... YLL058W sulfur metabolism cystathionine gamma-synthase activicellular component unknown | YLL059C	YPS1009	2a	-0.3943	1.2869	0.0069	0.6413	0	0.0548	0.297	566.33	146.78
YLR165C	YLR165C ... PUS5 rRNA modification* pseudouridylate synthase activity mitochondrion | YLR166C	YPS1009	2a	-0.4886	1.5139	0.1318	0.4551	0.0016	0.0539	0.3575	303.33	74.33
YLR119W	YLR119W ... SRN2 protein-vacuolar targeting* molecular function unknown endosome* | YLR120C	YPS1009	2a	-0.4945	1.4487	0.0636	0.5035	0.0008	0.0514	0.3807	285.67	145
YLR336C	YLR336C PAC cluster SGD1 osmoregulation molecular function unknown nucleus* | YLR337C	YPS1009	2a	-0.2294	1.2275	0.3928	0.4106	0.0056	0.0474	0.1437	1114	1942.78
YHR006W	YHR006W ... STP2 positive regulation of transcr specific RNA polymerase II transcrinucleus | YHR007C	NCYC110	2a	-0.1156	0.7852	0.0027	0.9453	0.0001	0.047	0.0048	716.17	389.38
YLR105C	YLR105C ... SEN2 tRNA splicing tRNA-intron endonuclease activity mitochondrial outer membrane* | YLR106C	YPS1009	2a	-0.2634	1.248	0.2322	0.5154	0.0022	0.0458	0.2043	457.67	552.56
YLR015W	YLR015W ... BRE2 chromatin silencing at telomer transcription regulator activity* COMPASS complex | YLR016C	YPS1009	2a	-0.5292	1.4477	0.0015	0.5108	0	0.045	0.4427	661.83	499.56
YHR136C	YHR136C ... SPL2 response to temperature enzyme inhibitor activity cytoplasm | YHR137C-A	NCYC110	2a	-1.1484	1.599	0.0176	0.8885	0.0052	0.0442	0.0445	192.33	15.25
YLR221C	YLR221C PAC cluster RSA3 ribosomal large subunit assemb molecular function unknown nucleolus* | YLR222C	YPS1009	2a	-0.9526	1.5328	0	0.4921	0	0.0432	0.4648	306.33	1504.89
YLR138W	YLR138W ... NHA1 monovalent inorganic cation ho cation:cation antiporter activity plasma membrane | YLR139C	YPS1009	2a	-0.3767	1.2562	0.0007	0.649	0	0.0431	0.3072	1217.67	2557.44
YLR292C	YLR292C ... SEC72 posttranslational protein-memb protein transporter activity endoplasmic reticulum membrane* | YLR293C	YPS1009	2a	-0.3421	1.098	0	0.8317	0	0.0429	0.1254	262.17	934
YHR059W	YHR059W ... FYV4 biological process unknown molecular function unknown mitochondrion | YHR060W	NCYC110	2a	-0.1494	0.7969	0.0003	0.9534	0	0.0408	0.0054	175.83	240.25
YHR070W	YHR070W ... TRM5 tRNA methylation tRNA (guanine) methyltransferase accytoplasm* | YHR071C-A	NCYC110	2a	-0.1939	0.8594	0	0.9583	0	0.0391	0.0026	525.5	756
YLR351C	YLR351C ... NIT3 biological process unknown "hydrolase activity, acting on carbo"cytoplasm* | YLR352W	YPS1009	2a	-0.4393	1.2362	0	0.6545	0	0.0386	0.3069	327.5	859.33
YLR276C	YLR276C PAC cluster DBP9 35S primary transcript process ATP-dependent RNA helicase activitynucleolus | YLR277C	YPS1009	2a	-0.3105	1.2957	0.0285	0.565	0.0002	0.037	0.3693	694	3350.22
YHL002C-A	YHL002C-A | YHL002W	NCYC110	2a	-0.208	1.6659	0.1513	0.5046	0.1746	0.035	0.1345	252.17	10.38
YHR175W-A	YHR175W-A ... YHR175W-A biological process unknown molecular function unknown cellular component unknown | YHR176W	NCYC110	2a	0.0925	1.3968	0.188	0.3577	0.2776	0.0339	0.1429	74.17	46.25
YHL014C	YHL014C ... YLF2 biological process unknown molecular function unknown mitochondrion | YHL015W	NCYC110	2a	-0.1558	0.8493	0	0.9629	0	0.0336	0.0035	525.33	255.62
YHR119W	YHR119W ... SET1 chromatin silencing at telomer histone lysine N-methyltransferase COMPASS complex | YHR120W	NCYC110	2a	-0.271	0.9034	0	0.9678	0	0.0306	0.0016	1239.5	1988.62
YHR165W-A	YHR165W-A | YHR166C	NCYC110	2a	-0.1377	1.1061	0.1821	0.6607	0.0858	0.0269	0.0444	95	22.88
YHR116W	YHR116W ... COX23 aerobic respiration molecular function unknown cytoplasm* | YHR117W	NCYC110	2a	-0.2876	0.8542	0	0.9653	0	0.0264	0.0083	184.67	185.5
YLR278C	YLR278C ... YLR278C biological process unknown molecular function unknown nucleus | YLR279W	YPS1009	2a	-0.1736	1.1392	0.2118	0.6008	0.0009	0.0256	0.1608	1493.33	896.44
YHR124W	YHR124W ... NDT80 meiosis* transcription factor activity nuclear chromosome | YHR125W	NCYC110	2a	-0.3696	1.7469	0.1708	0.5461	0.1368	0.0243	0.1221	809.67	26.25
YHR168W	YHR168W ... MTG2 protein biosynthesis GTPase activity* mitochondrial inner membrane* | YHR169W	NCYC110	2a	-0.4619	0.9676	0	0.9583	0	0.0241	0.0176	507.17	262.25
YHL050C	YHL050C ... YHL050C biological process unknown helicase activity cellular component unknown | YHL050W-A	NCYC110	2a	-0.4303	1.3037	0.0002	0.9305	0	0.0235	0.0457	278	137.88
YHR195W	YHR195W ... NVJ1 microautophagy protein binding nuclear membrane | YHR196W	NCYC110	2a	-0.2899	0.8829	0	0.973	0	0.0235	0.0035	410	526.5
YHR167W	YHR167W ... THP2 mRNA-nucleus export* nucleic acid binding THO complex | YHR168W	NCYC110	2a	-0.0409	0.8799	0.0351	0.9376	0.0011	0.023	0.0031	373.67	417.75
YHR034C	YHR034C ... PIH1 rRNA processing* molecular function unknown cytoplasm* | YHR035W	NCYC110	2a	-0.2952	0.8755	0	0.9695	0	0.0227	0.0078	366.67	246.75
YHR108W	YHR108W ... GGA2 Golgi to vacuole transport molecular function unknown Golgi trans face | YHR109W	NCYC110	2a	-0.161	0.8834	0	0.9742	0	0.0224	0.0035	676.5	2611.25
YHR049C-A	YHR049C-A | YHR049W	NCYC110	2a	-1.0276	1.8623	0.0125	0.8833	0.0028	0.0207	0.0807	158.5	6.12
YHR032W	YHR032W ... YHR032W biological process unknown molecular function unknown cellular component unknown | YHR032W-A	NCYC110	2a	-0.2316	0.8992	0	0.9777	0	0.0188	0.0034	645.5	2321.88
YHR036W	YHR036W … BRL1 biological process unknown molecular function unknown | Essential nuclear envelope integral membrane protein identified as a suppressor of a conditional mutation in the major karyopherin, CRM1; homologous to and interacts with Brr6p, a nuclear envelope protein involved in nuclear exportYHR037W	NCYC110	2a	-0.3821	0.9016	0	0.978	0	0.0187	0.0033	583.17	398.88
YHR026W	YHR026W PAC cluster PPA1 vacuolar acidification hydrogen-transporting ATPase activiintegral to membrane* | YHR027C	NCYC110	2a	0.0203	0.8657	0.4388	0.4997	0.0405	0.0186	0.0024	275	2876.25
YHR127W	YHR127W ... YHR127W biological process unknown molecular function unknown nucleus | YHR128W	NCYC110	2a	-0.5569	0.9669	0	0.968	0	0.0185	0.0135	321.5	279.75
YHR070C-A	YHR070C-A | YHR070W	NCYC110	2a	-0.3608	1.21	0.1122	0.795	0.0366	0.0181	0.0381	143.67	5.62
YHR143W	YHR143W ... DSE2 cell wall organization and bio "glucan 1,3-beta-glucosidase activit"cell wall (sensu Fungi)* | YHR143W-A	NCYC110	2a	0.0143	0.853	0.3816	0.5463	0.0483	0.0181	0.0057	420.67	848.25
YHR218W	YHR218W ... YHR218W biological process unknown molecular function unknown cellular component unknown | YHR218W-A	NCYC110	2a	-1.5964	6.1506	0.0845	0.6106	0.0046	0.018	0.2822	327.83	252.38
YHR177W	YHR177W ... YHR177W biological process unknown molecular function unknown cellular component unknown | YHR178W	NCYC110	2a	-0.2362	0.9721	0.0191	0.9463	0.0016	0.0169	0.0161	586.83	232.38
YLR328W	YLR328W ... NMA1 NAD metabolism nicotinamide-nucleotide adenylyltracytoplasm* | YLR329W	YPS1009	2a	-0.2253	1.1095	0	0.7508	0	0.0169	0.2324	508.17	861.67
YHL022C	YHL022C ... SPO11 meiotic DNA double-strand brea "endodeoxyribonuclease activity, pro"nuclear chromosome | YHL023C	NCYC110	2a	-0.8935	2.5386	0.1231	0.5874	0.0745	0.0167	0.1983	513	19.62
YHR106W	YHR106W ... TRR2 response to oxidative stress thioredoxin-disulfide reductase actmitochondrion | YHR107C	NCYC110	2a	-0.5106	1.1709	0.0037	0.9504	0.0004	0.0159	0.0296	399.5	251.12
YHL009C	YHL009C ... YAP3 regulation of transcription fr transcription factor activity nucleus | YHL010C	NCYC110	2a	-0.2584	0.9286	0.0001	0.9754	0	0.0152	0.0093	444.33	503
YLR212C	YLR212C ... TUB4 mitotic spindle organization a structural constituent of cytoskeleouter plaque of spindle pole body* | YLR213C	YPS1009	2a	-0.1907	1.2206	0.2678	0.3987	0.0014	0.0152	0.317	550.33	433.44
YHR032W-A	YHR032W-A | YHR033W	NCYC110	2a	-0.3902	1.3055	0.0834	0.8355	0.0184	0.0151	0.0475	74	35.12
YHR194W	YHR194W ... MDM31 mitochondrion organization and molecular function unknown nucleus* | YHR195W	NCYC110	2a	-0.3302	0.9302	0	0.9771	0	0.0148	0.0081	625.33	207
YHR085W	YHR085W ... IPI1 rRNA processing* molecular function unknown nucleus* | YHR086W	NCYC110	2a	-0.0819	0.9077	0.0718	0.9027	0.0041	0.0148	0.0067	439.5	731.75
YHR067W	YHR067W ... HTD2 fatty acid biosynthesis 3-hydroxyacyl-[acyl-carrier proteinmitochondrion | YHR068W	NCYC110	2a	-0.3768	0.9848	0.0001	0.9717	0	0.0144	0.0139	345	109.62
YHL029C	YHL029C … OCA5 metabolism molecular function unknown | Cytoplasmic protein required for replication of Brome mosaic virus in S. cerevisiae, which is a model system for studying replication of positive-strand RNA viruses in their natural hostsYHL030W	NCYC110	2a	-0.012	0.8982	0.2114	0.7616	0.0096	0.0143	0.0031	853.17	1442.25
YHR087W	YHR087W … iESR cluster RTC3 RNA metabolism molecular function unknown | Protein of unknown function involved in RNA metabolism; has structural similarity to SBDS, the human protein mutated in Shwachman-Diamond Syndrome (the yeast SBDS ortholog = SDO1); null mutation suppresses cdc13-1 temperature sensitivityYHR088W	NCYC110	2a	-1.7006	2.2636	0.0001	0.8961	0	0.0142	0.0896	162	23.38
YHR187W	YHR187W ... IKI1 regulation of transcription fr RNA polymerase II transcription elotranscription elongation factor com | YHR188C	NCYC110	2a	-0.0241	0.9498	0.3192	0.596	0.0591	0.0134	0.0123	412.33	492.5
YHR210C	YHR210C ... YHR210C biological process unknown molecular function unknown cellular component unknown | YHR211W	NCYC110	2a	-0.2453	1.6792	0.25	0.2918	0.2287	0.0132	0.2164	346.5	47.12
YHR007C-A	YHR007C-A ... YHR007C-A biological process unknown molecular function unknown cellular component unknown | YHR008C	NCYC110	2a	-0.2036	1.2675	0.1772	0.7165	0.0441	0.0129	0.0493	117.83	108.88
YHR169W	YHR169W PAC cluster DBP8 35S primary transcript process ATP-dependent RNA helicase activitynucleolus | YHR170W	NCYC110	2a	-0.1535	0.9465	0.0219	0.9547	0.0013	0.0128	0.0094	525.83	1333
YHR084W	YHR084W ... STE12 pseudohyphal growth* transcription factor activity nucleus | YHR085W	NCYC110	2a	-0.4704	0.9716	0	0.979	0	0.0119	0.0092	826.5	806.12
YHR171W	YHR171W iESR cluster ATG7 protein-vacuolar targeting* ubiquitin-like conjugating enzyme acytoplasm* | YHR172W	NCYC110	2a	-0.7519	1.3241	0.0001	0.9457	0	0.0118	0.0425	866.17	184.38
YHR008C	YHR008C ... SOD2 replicative cell aging* manganese superoxide dismutase actimitochondrion* | YHR009C	NCYC110	2a	-0.2791	1.023	0.002	0.9703	0.0001	0.0116	0.016	271	2286
YHR003C	YHR003C ... YHR003C biological process unknown molecular function unknown mitochondrion | YHR004C	NCYC110	2a	-0.1775	0.9521	0.0001	0.9805	0	0.0113	0.0081	572.17	1284.12
YHR129C	YHR129C ... ARP1 establishment of mitotic spind structural constituent of cytoskeledynactin complex | YHR130C	NCYC110	2a	-0.2612	1.0458	0.0109	0.959	0.0007	0.0112	0.0182	492.17	359
YHR118C	YHR118C ... ORC6 DNA replication initiation* DNA replication origin binding pre-replicative complex* | YHR119W	NCYC110	2a	-0.1948	0.9433	0	0.9823	0	0.0112	0.0065	540.67	444.5
YHR038W	YHR038W ... RRF1 protein biosynthesis translation termination factor actimitochondrion | YHR039C	NCYC110	2a	-0.2535	0.9945	0.0011	0.9755	0.0001	0.0109	0.0124	300.67	142.12
YHR144C	YHR144C PAC cluster DCD1 pyrimidine nucleotide metaboli dCMP deaminase activity cytoplasm | YHR145C	NCYC110	2a	-0.0463	0.9271	0.1252	0.8546	0.0054	0.0107	0.0041	398.17	460.75
YHR090C	YHR090C ... YNG2 chromatin modification enzyme activator activity nucleus* | YHR091C	NCYC110	2a	-0.6442	1.1254	0	0.9679	0	0.0102	0.0218	405.67	303.25
YHR075C	YHR075C ... PPE1 protein biosynthesis* structural constituent of ribosome*mitochondrial small ribosomal subun | YHR076W	NCYC110	2a	-0.648	1.5758	0.0136	0.8918	0.0016	0.0101	0.0829	515	93.25
YHL031C	YHL031C ... GOS1 vesicle fusion* v-SNARE activity integral to membrane | YHL032C	NCYC110	2a	-0.4012	1.0116	0	0.9776	0	0.0101	0.0123	264.67	491.38
YHR140W	YHR140W ... YHR140W biological process unknown molecular function unknown integral to membrane | YHR141C	NCYC110	2a	-0.9694	1.0374	0	0.9774	0	0.01	0.0127	345.17	22.75
YHR149C	YHR149C ... SKG6 biological process unknown molecular function unknown bud neck* | YHR150W	NCYC110	2a	-0.1879	0.9704	0.0009	0.9805	0	0.0098	0.0087	899	2188.25
YHR132W-A	YHR132W-A ... YHR132W-A biological process unknown molecular function unknown cytoplasm* | YHR133C	NCYC110	2a	-0.2034	0.9636	0	0.9833	0	0.0096	0.0072	180.67	397.5
YHR016C	YHR016C ... YSC84 endocytosis* molecular function unknown actin cortical patch | YHR017W	NCYC110	2a	-0.5251	1.0979	0	0.97	0	0.0093	0.0206	576	216.12
YHL002W	YHL002W ... HSE1 protein-vacuolar targeting protein binding endosome | YHL003C	NCYC110	2a	-0.4128	1.0579	0	0.9746	0	0.0092	0.0163	603.17	708.5
YHR050W-A	YHR050W-A ... YHR050W-A biological process unknown molecular function unknown cellular component unknown | YHR051W	NCYC110	2a	0.0019	0.9629	0.4122	0.4906	0.0802	0.0089	0.008	85.5	709.5
YHR176W	YHR176W ... FMO1 protein folding monooxygenase activity endoplasmic reticulum membrane | YHR177W	NCYC110	2a	-0.475	1.2689	0.0025	0.9457	0.0002	0.0088	0.0428	513	71.25
YHR001W	YHR001W ... OSH7 steroid biosynthesis oxysterol binding cellular component unknown | YHR001W-A	NCYC110	2a	-0.0211	0.9255	0.3381	0.6347	0.0159	0.0087	0.0027	579.17	892
YHR086W	YHR086W ... NAM8 nuclear mRNA splicing, via spl RNA binding* commitment complex* | YHR086W-A	NCYC110	2a	-0.5935	0.994	0	0.9831	0	0.0085	0.0084	687.33	549
YHR110W	YHR110W ... ERP5 secretory pathway molecular function unknown integral to membrane | YHR111W	NCYC110	2a	-0.4145	0.9529	0	0.9878	0	0.0085	0.0037	292.67	564.38
YHR206W	YHR206W ... SKN7 response to osmotic stress* transcription factor activity* nucleus | YHR207C	NCYC110	2a	-0.1319	0.9569	0.0003	0.986	0	0.0085	0.0052	793.5	1521.62
YHR040W	YHR040W ... BCD1 snoRNA metabolism nucleic acid binding cytoplasm* | YHR041C	NCYC110	2a	-0.5643	1.221	0.0001	0.96	0	0.008	0.0319	400.83	644.5
YHR107C	YHR107C ... CDC12 cell wall organization and bio GTPase activity* cytoplasm* | YHR108W	NCYC110	2a	-0.3845	1.0695	0	0.975	0	0.008	0.0169	538.33	2098.25
YHL023C	YHL023C ... RMD11 biological process unknown molecular function unknown cellular component unknown | YHL024W	NCYC110	2a	-0.3132	0.9626	0	0.9885	0	0.0074	0.0041	1501.17	811.88
YHR182W	YHR182W ... YHR182W biological process unknown molecular function unknown cytoplasm | YHR183W	NCYC110	2a	-0.1502	0.9872	0.0012	0.9845	0	0.0069	0.0074	926.33	447.75
YHR062C	YHR062C ... RPP1 rRNA processing* ribonuclease P activity* ribonuclease MRP complex* | YHR063C	NCYC110	2a	-0.1079	1.0356	0.2065	0.7567	0.0175	0.0068	0.0125	354	546
YHL018W	YHL018W ... YHL018W biological process unknown molecular function unknown mitochondrion | YHL019C	NCYC110	2a	-0.3367	1.3503	0.0653	0.8538	0.0067	0.0066	0.0676	168.83	66.62
YHR201C	YHR201C ... PPX1 polyphosphate metabolism exopolyphosphatase activity cytoplasm | YHR202W	NCYC110	2a	-0.3114	1.0037	0	0.9849	0	0.0066	0.0085	473.67	1036.62
YHR121W	YHR121W ... LSM12 RNA metabolism RNA binding cytoplasm* | YHR122W	NCYC110	2a	-0.189	0.9727	0	0.9885	0	0.0066	0.0049	274.83	956.88
YHR089C	YHR089C PAC cluster GAR1 rRNA modification* RNA binding nucleolus* | YHR090C	NCYC110	2a	-0.2151	1.0389	0.0004	0.9806	0	0.0063	0.0127	198.83	3774.38
YHR035W	YHR035W ... YHR035W biological process unknown molecular function unknown cellular component unknown | YHR036W	NCYC110	2a	-0.5157	1.2769	0	0.9432	0	0.0062	0.0505	799.67	198.38
YHR077C	YHR077C ... NMD2 mRNA catabolism* protein binding cytoplasm* | YHR078W	NCYC110	2a	-0.2413	1.0193	0	0.9841	0	0.006	0.0099	1442.83	2933
YHR057C	YHR057C ... CPR2 biological process unknown peptidyl-prolyl cis-trans isomerasecellular component unknown | YHR058C	NCYC110	2a	-0.2627	0.9831	0	0.9887	0	0.0059	0.0053	230.33	478.88
YHR079C	YHR079C ... IRE1 protein amino acid phosphoryla protein serine/threonine kinase actendoplasmic reticulum membrane* | YHR079C-A	NCYC110	2a	-0.0659	0.9821	0.1242	0.8598	0.0046	0.0058	0.0056	1350.33	1434.88
YHL034C	YHL034C ... SBP1 RNA metabolism RNA binding nucleolus | YHL034W-A	NCYC110	2a	-0.3241	1.1106	0	0.9725	0	0.0057	0.0218	316.83	4433.88
YHR207C	YHR207C ... SET5 biological process unknown molecular function unknown cytoplasm* | YHR208W	NCYC110	2a	-0.1049	1.0857	0.2977	0.6476	0.0322	0.0057	0.0167	617.33	654
YHR143W-A	YHR143W-A PAC cluster RPC10 transcription from RNA polymer DNA-directed RNA polymerase activitDNA-directed RNA polymerase III com | YHR144C	NCYC110	2a	-0.1041	1.105	0.3071	0.6328	0.0353	0.0057	0.0191	112.5	1377.12
YHR103W	YHR103W ... SBE22 cell wall organization and bio molecular function unknown cytoplasm | YHR104W	NCYC110	2a	-0.079	0.9928	0.0894	0.8959	0.0032	0.0053	0.0062	1087.83	1747.88
YHR192W	YHR192W ... YHR192W biological process unknown molecular function unknown cytoplasm | YHR193C	NCYC110	2a	-0.2276	1.0114	0	0.9872	0	0.005	0.0078	350.17	531.12
YHR154W	YHR154W ... RTT107 negative regulation of DNA tra molecular function unknown nucleus | YHR155W	NCYC110	2a	-0.1987	0.9966	0	0.9891	0	0.0049	0.006	1276.17	938.5
YHR099W	YHR099W ... TRA1 regulation of transcription fr histone acetyltransferase activity histone acetyltransferase complex* | YHR100C	NCYC110	2a	-0.1541	0.9764	0	0.9923	0	0.0047	0.003	4971.5	8462.38
YHR186C	YHR186C ... KOG1 biological process unknown molecular function unknown mitochondrion* | YHR187W	NCYC110	2a	-0.133	0.9761	0	0.9923	0	0.0047	0.0029	1798.67	1547.75
YHR031C	YHR031C ... RRM3 DNA replication DNA helicase activity* nuclear telomeric heterochromatin | YHR032C-A	NCYC110	2a	-0.662	1.3711	0	0.9051	0	0.0046	0.0904	893.17	732.62
YHR002W	YHR002W ... LEU5 coenzyme A transport coenzyme A transporter activity mitochondrial inner membrane | YHR003C	NCYC110	2a	-0.3707	1.0687	0	0.9806	0	0.0046	0.0147	508.83	195.62
YHR166C	YHR166C ... CDC23 mitotic sister chromatid segre protein binding* anaphase-promoting complex | YHR167W	NCYC110	2a	-0.1582	1.1482	0.1801	0.7753	0.0138	0.0042	0.0266	778	506
YHR113W	YHR113W ... YHR113W proteolysis and peptidolysis metalloendopeptidase activity* cytoplasm* | YHR114W	NCYC110	2a	-0.3567	1.0858	0	0.9787	0	0.004	0.0173	568.33	554.88
YHR165C	YHR165C ... PRP8 nuclear mRNA splicing, via spl "RNA splicing factor activity, trans"U4/U6 x U5 tri-snRNP complex* | YHR165W-A	NCYC110	2a	-0.2153	1.044	0	0.9851	0	0.0039	0.011	2803.17	5420.25
YHR200W	YHR200W ... RPN10 ubiquitin-dependent protein ca endopeptidase activity proteasome complex (sensu Eukaryota | YHR201C	NCYC110	2a	-0.7128	1.2028	0	0.9581	0	0.0037	0.0382	289.5	969.88
YHR033W	YHR033W ... YHR033W biological process unknown molecular function unknown cytoplasm | YHR034C	NCYC110	2a	-0.6353	1.7561	0.0973	0.5811	0.0162	0.0036	0.3018	389.5	69.5
YHL032C	YHL032C ... GUT1 glycerol metabolism glycerol kinase activity cytoplasm | YHL033C	NCYC110	2a	-0.0954	1.0748	0.2898	0.6738	0.0201	0.0034	0.0129	701.83	373.12
YHR189W	YHR189W ... PTH1 protein biosynthesis aminoacyl-tRNA hydrolase activity mitochondrion | YHR190W	NCYC110	2a	-0.5465	1.1431	0	0.967	0	0.0033	0.0297	194	96.88
YHR017W	YHR017W ... YSC83 biological process unknown molecular function unknown mitochondrion | YHR018C	NCYC110	2a	-0.0362	1.0033	0.4374	0.5246	0.0299	0.0033	0.0047	497	551.38
YHR159W	YHR159W ... YHR159W biological process unknown molecular function unknown cytoplasm | YHR160C	NCYC110	2a	-0.8019	1.1113	0	0.9756	0	0.0031	0.0214	544.83	178
YHR028C	YHR028C ... DAP2 protein processing dipeptidyl-peptidase and tripeptidyvacuolar membrane (sensu Fungi) | YHR028W-A	NCYC110	2a	-0.3621	1.0883	0	0.9786	0	0.0031	0.0184	1024	1549
YHR132C	YHR132C ... ECM14 cell wall organization and bio metalloendopeptidase activity vacuole (sensu Fungi) | YHR132W-A	NCYC110	2a	-0.0388	0.9888	0.1168	0.8753	0.0019	0.0031	0.0028	542.17	2137.62
YHR115C	YHR115C ... DMA1 mitotic spindle checkpoint* molecular function unknown cytoplasm | YHR116W	NCYC110	2a	-0.3694	1.022	0	0.9904	0	0.003	0.0066	465	972.88
YHR091C	YHR091C ... MSR1 protein biosynthesis* arginine-tRNA ligase activity mitochondrion | YHR092C	NCYC110	2a	-0.3278	1.0606	0	0.9843	0	0.003	0.0127	806.5	658.38
YHR037W	YHR037W ... PUT2 glutamate biosynthesis* 1-pyrroline-5-carboxylate dehydrogemitochondrion | YHR038W	NCYC110	2a	-0.9714	1.2819	0	0.9065	0	0.0029	0.0906	654.83	1032.62
YHR114W	YHR114W ... BZZ1 actin filament organization* molecular function unknown cytoplasm* | YHR115C	NCYC110	2a	-0.3729	1.04	0	0.9883	0	0.0028	0.0089	781.67	1027.12
YHR123W	YHR123W ... EPT1 phosphatidylethanolamine biosy ethanolaminephosphotransferase actiendoplasmic reticulum | YHR124W	NCYC110	2a	-0.2486	1.2081	0.0118	0.9209	0.0005	0.0028	0.0641	544.33	679.88
YHR065C	YHR065C PAC cluster RRP3 35S primary transcript process ATP-dependent RNA helicase activitynucleolus | YHR066W	NCYC110	2a	-0.1799	1.2224	0.1972	0.7313	0.0136	0.0028	0.0552	632.67	2082.88
YHL003C	YHL003C ... LAG1 replicative cell aging* sphingosine N-acyltransferase activendoplasmic reticulum | YHL004W	NCYC110	2a	-0.2188	1.0951	0	0.9761	0	0.0025	0.0214	553.33	1468
YHR058C	YHR058C ... MED6 transcription from RNA polymer RNA polymerase II transcription medmediator complex | YHR059W	NCYC110	2a	-0.204	1.0484	0	0.987	0	0.0025	0.0106	346.5	461.62
YHR146W	YHR146W ... CRP1 biological process unknown DNA binding nucleus | YHR147C	NCYC110	2a	-0.5309	1.3678	0	0.7987	0	0.0024	0.1989	573.67	2062.5
YHR080C	YHR080C ... YHR080C biological process unknown molecular function unknown mitochondrion | YHR081W	NCYC110	2a	-0.428	1.1441	0	0.9591	0	0.0024	0.0386	1652.33	1432.62
YHL027W	YHL027W ... RIM101 sporulation (sensu Fungi)* specific transcriptional repressor nucleus | YHL028W	NCYC110	2a	-0.33	1.2157	0	0.9145	0	0.0024	0.0831	682.17	949.88
YHR158C	YHR158C ... KEL1 cellular morphogenesis* molecular function unknown cytoplasm* | YHR159W	NCYC110	2a	-0.1515	1.0639	0.0005	0.9833	0	0.0024	0.0138	1359.5	2291.88
YHR199C	YHR199C … AIM46 biological process unknown molecular function unknown mitochondrion | Putative protein of unknown function; the authentic, non-tagged protein is detected in highly purified mitochondria in high-throughput studies; null mutant displays elevated frequency of mitochondrial genome lossYHR199C-A	NCYC110	2a	-0.1851	1.3198	0.3096	0.5353	0.0365	0.0023	0.1162	334.67	711.25
YHL006C	YHL006C ... SHU1 error-free DNA repair molecular function unknown nucleus | YHL006W-A	NCYC110	2a	-0.2886	1.2453	0.0022	0.8784	0.0001	0.0022	0.1171	145.33	45.5
YHR074W	YHR074W ... QNS1 biological process unknown "hydrolase activity, acting on carbo"cytoplasm* | YHR075C	NCYC110	2a	-0.2319	1.0999	0	0.9738	0	0.0022	0.024	953	2328.75
YHR012W	YHR012W ... VPS29 retrograde transport, endosome molecular function unknown endosome* | YHR013C	NCYC110	2a	-0.3637	1.1989	0	0.913	0	0.002	0.085	426.33	694.75
YHR023W	YHR023W ... MYO1 response to osmotic stress* microfilament motor activity contractile ring (sensu Saccharomyc | YHR024C	NCYC110	2a	-0.2189	1.0778	0	0.9801	0	0.002	0.0179	2357.17	3748.88
YHR073W	YHR073W ... OSH3 steroid biosynthesis oxysterol binding cytoplasm | YHR073W-A	NCYC110	2a	-0.1691	1.0762	0	0.9804	0	0.002	0.0175	1215.67	2735.25
YHL019C	YHL019C ... APM2 vesicle-mediated transport clathrin binding AP-1 adaptor complex | YHL019W-A	NCYC110	2a	-0.4773	1.1678	0	0.9231	0	0.0017	0.0752	764.67	298
YHR081W	YHR081W ... LRP1 DNA repair* molecular function unknown nuclear exosome (RNase complex) | YHR082C	NCYC110	2a	-0.2989	1.1888	0	0.9011	0	0.0017	0.0971	270.67	725.38
YHR134W	YHR134W ... WSS1 protein sumoylation molecular function unknown cellular component unknown | YHR135C	NCYC110	2a	-0.4837	1.1508	0	0.9372	0	0.0016	0.0611	316.83	206.62
YHR131C	YHR131C ... YHR131C biological process unknown molecular function unknown cytoplasm | YHR131W-A	NCYC110	2a	-0.2511	1.0034	0	0.9959	0	0.0016	0.0025	1029.83	949.25
YHR063C	YHR063C ... PAN5 pantothenate biosynthesis 2-dehydropantoate 2-reductase activcytoplasm* | YHR063W-A	NCYC110	2a	-0.1404	1.1222	0.004	0.9436	0.0001	0.0014	0.0509	481.17	1090.88
YHR161C	YHR161C ... YAP1801 endocytosis clathrin binding actin cortical patch | YHR162W	NCYC110	2a	-0.1822	1.1214	0.0001	0.9443	0	0.0013	0.0543	727.67	1051.62
YHR111W	YHR111W ... UBA4 protein modification URM1 activating enzyme activity cytoplasm | YHR112C	NCYC110	2a	-0.4792	1.2501	0	0.7406	0	0.0012	0.2581	530.33	514
YHR172W	YHR172W ... SPC97 microtubule nucleation structural constituent of cytoskeleouter plaque of spindle pole body* | YHR173C	NCYC110	2a	-0.4752	1.0948	0	0.9526	0	0.001	0.0465	1124.83	746.5
YHR205W	YHR205W ... SCH9 protein amino acid phosphoryla protein serine/threonine kinase actcytoplasm* | YHR206W	NCYC110	2a	-0.3404	1.2022	0	0.7637	0	0.001	0.2353	959	3310.5
YHL011C	YHL011C PAC cluster PRS3 histidine biosynthesis* ribose-phosphate diphosphokinase accytoplasm | YHL012W	NCYC110	2a	-0.0688	1.0897	0.3532	0.6185	0.0089	0.001	0.0183	424.17	4898.5
YHR076W	YHR076W ... PTC7 biological process unknown protein phosphatase type 2C activitmitochondrion | YHR077C	NCYC110	2a	-0.196	1.1104	0	0.9252	0	0.0009	0.0738	453.67	1227.25
YLR372W	YLR372W PAC cluster SUR4 sphingolipid biosynthesis* fatty acid elongase activity endoplasmic reticulum* | YLR373C	YPS1009	2b	0.3229	1.0108	0	0	0.4538	0.3085	0.2377	401.17	7050.89
YLR367W	YLR367W RP cluster RPS22B protein biosynthesis structural constituent of ribosome cytosolic small ribosomal subunit ( | YLR368W	YPS1009	2b	0.5717	1.0256	0	0	0.4459	0.2822	0.2719	181	4609.44
YHL040C	YHL040C ... ARN1 iron-siderophore transport siderophore-iron transporter activiendosome* | YHL041W	NCYC110	2b	0.5097	0.6282	0.0007	0.0002	0.7281	0.2487	0.0224	765.83	955.88
[truncated: 400 more rows]

## Sheet: Linear increase non-amp genes
UID	Benamini-Hochberg corrected p-value for linear fit (OR MLR Class 3b)	Strain
YBR296C	0.000396519	NCYC panel
YPL257W-B	0.000396519	NCYC panel
YAR009C	0.000412955	NCYC panel
[truncated: 132 more rows]
